# Supplementary material
Source: publisher site journal article supplement (https://www.spandidos-publications.com/6392/downloadSupplementary)
Supplement: Supplementary file 1 [file downloadSupplementary]

## Sheet: Sheet1
Table SII. Different abundance in microbial composition between the AONFH and NC groups at the species level.
Species	AONFH_1	AONFH_2	AONFH_3	AONFH_4	AONFH_5	AONFH_6	AONFH_7	AONFH_8	AONFH_9	AONFH_10	AONFH_11	AONFH_12	AONFH_13	AONFH_14	AONFH_15	AONFH_16	AONFH_17	AONFH_18	AONFH_19	AONFH_20	AONFH_21	AONFH_22	AONFH_23	AONFH_24	AONFH_25	AONFH_26	AONFH_27	AONFH_28	AONFH_29	AONFH_30	AONFH_31	AONFH_32	AONFH_33	AONFH_34	AONFH_35	AONFH_36	AONFH_37	AONFH_38	AONFH_39	AONFH_40	AONFH_41	AONFH_42	AONFH_43	AONFH_44	AONFH_45	AONFH_46	AONFH_47	AONFH_48	AONFH_49
Pseudomonas_aeruginosa	4.7871	3.3343	536.808	2.9675	8.2045	4.3873	6.0961	22.4514	35.8804	1357.34	6.0328	2.7886	2.1059	1.8611	3.739	12463.2	33913	3.5524	3.8919	6.3542	3.5255	288.926	5558.31	5.6189	90.2548	3.5468	3.8762	6.1856	8.216	25.0806	5.2249	4.2321	2.3226	99.3023	2.7091	4.6113	3.7592	8.1501	161.941	5.1318	1.7808	18.8003	44.2132	15.5116	24.2258	264.303	15.7585	29.7135	12.4324
Chlamydia_trachomatis	353.217	140.928	522.759	98.9372	347.264	508.078	234.173	694.776	1337.33	977.074	3.7469	185.068	89.3562	49.453	18.7727	65.5261	57.6866	33.6358	56.34	216.695	106.04	648.688	27.0953	34.3391	26.5983	122.806	75.354	295.716	198.844	33.0262	661.893	2666.6	177.98	494.489	479.494	499.146	491.669	790.972	344.066	468.951	294.677	1004.34	1953.78	775.625	837.932	1837.41	703.151	1217.97	570.413
Chlamydia_abortus	11.6472	13.3608	53.5336	28.537	71.5151	54.4467	61.2214	106.815	192.995	142.797	0	0.0868	0.2411	0.1481	0.2165	0.1543	0.3235	0.352	0	0	0.0258	0.1796	2.8548	1.3398	0	0	1.2054	0	2.3261	0.0671	194.363	137.901	50.8396	51.6209	110.4	165.199	108.436	228.229	90.4915	136.28	58.2281	115.365	321.248	113.139	183.018	260.162	128.938	214.265	95.238
Klebsiella_quasivariicola	0.2699	0.1097	0.9685	0.5804	0.6861	1.4077	1.2177	579.645	1025.63	664.791	0	0	0	0	0	0	0	0	0	0	0	0	0	0	0	0.1118	0	0	0	0	0.5451	0	0	0	0	0.5191	0	0.7954	0	0.5799	0	2.5451	6.9573	2.0019	4.2809	3.9719	2.8062	5.7759	2.5747
Kangiella_spongicola	11.84	13.7151	65.6228	20.688	46.4513	33.2057	34.2193	50.171	93.0112	62.1103	0	0	0	0	0	0.0287	0.1448	0	0.1006	0	0	0	0	0.1086	0	0	0	0	0	0	41.3694	32.9123	10.9406	12.9453	25.9794	40.6166	26.5436	43.5977	23.8615	36.1714	13.6177	52.5557	160.537	49.8977	81.2329	129.417	51.1621	101.4	37.1138
Roseovarius_nitratireducens	0.6069	1.2025	3.3448	6.2834	15.106	10.5754	12.127	23.1061	41.5041	28.6636	0	0	0	0	0.1187	0	0	0	0	0	0	0	0	0	0	0	0	0	0	0	2.5547	1.3187	0.3641	0.4851	1.1965	1.5565	1.2559	1.962	0.9218	1.0013	0.3207	66.4087	215.197	58.3067	86.042	157.763	66.5069	124.691	51.3676
Acinetobacter_pittii	0.8688	0.7237	3.1529	6.3865	14.3676	6.5924	10.475	325.8	591.642	363.721	0	0	0	0	0	0	0	0	0	0	0	0	0	0	0	0	0	0	0	0	0.3555	0.7924	0.3329	0.6555	1.1348	1.2345	0.4151	1.8673	0.898	1.1346	0.6167	2.3889	11.2795	2.6772	5.0311	9.7508	3.376	6.7313	2.3459
Candidatus_Hodgkinia_cicadicola	5.7381	7.1244	36.5924	6.0321	7.8798	13.8162	18.3118	33.1236	89.6143	37.7116	0	0	0	0	0	0	0	0	0	0	0	0	0	0	0	0	0	0	0	0	32.7976	37.0636	11.7472	10.8538	21.3323	26.4881	24.9347	36.1724	15.4127	29.2109	14.0583	33.645	110.087	32.6266	41.5317	76.2101	31.9841	66.1264	25.9103
Idiomarina_aestuarii	7.9171	11.3508	43.6796	5.1538	13.6462	8.2309	9.9829	34.7643	73.725	36.9181	0	0	0	0	0	0	0	0	0	0	0	0	0.1404	0	0	0	0.1372	0	0	0	29.2869	28.3752	8.0181	10.9448	17.4705	29.1299	21.956	40.3701	13.963	26.5458	10.9786	23.3612	75.7917	18.7203	31.6152	55.3614	26.4163	39.3198	19.0507
Chlamydia_unclassified	5.8186	7.9314	24.956	3.739	7.8469	4.2856	9.3114	37.3398	74.2515	39.2894	0	0.4169	0	0.3006	0	0	0.9676	0.6808	0.1714	0	0.1473	0	2.0306	0	0	0.3651	0.1045	0	0	0.0805	24.8946	16.9951	7.3613	8.9879	16.3516	23.4514	17.1766	30.8051	14.6952	16.8625	8.3127	18.6329	77.3804	21.4477	33.406	53.029	22.7662	26.2124	17.1248
Bacillus_aciditolerans	0.1011	0.2164	0.3869	3.1814	6.1658	5.6246	5.1505	3.0618	7.7816	4.829	0	0	0	0	0	0	0	0	0	0	0	0	0	0	0	0	0	0	0	0	0.6014	0.4453	0.2322	0.2522	0.2109	0.8201	0.6161	0.8977	0.1272	0.4982	0.2481	28.4044	93.4837	29.4217	37.4652	70.5883	31.9918	55.3719	23.8357
Gammaproteobacteria_bacterium_2W06	11.3625	15.3629	52.9936	8.22	13.5489	14.2171	12.4626	25.8219	47.1693	34.9715	0	0	0	0	0	0	0	0	0.105	0	0	0	0	0	0	0	0.129	0	0	0	12.8949	12.1588	3.5071	4.3427	10.0972	12.381	7.7563	15.7279	8.0317	9.7538	4.3641	16.7895	51.4439	19.7637	25.9187	43.4023	17.6907	34.4025	16.065
Basidiobolus_meristosporus	2.4611	2.6764	7.7977	12.6007	24.6167	20.2458	27.6024	9.558	21.6233	14.8295	1.6988	0.2868	0.183	0.5169	0.5477	0.7093	1.6367	0.2578	0.6959	1.0852	0.6668	0.3178	0.3431	1.1129	0.7102	0.6351	0.9101	0.5453	1.9462	0.6642	7.5631	4.8701	1.4465	1.8669	4.3029	4.766	4.519	6.5232	2.4427	4.616	2.0206	21.7172	68.2676	26.7904	28.8376	50.4051	21.7659	39.7086	20.0836
Phanerochaete_pseudomagnoliae	2.5209	3.3102	8.0473	5.5169	7.2453	5.6064	3.6975	15.7643	25.1014	14.0148	0	0	0	0	0	0	0	0	0	0	0	0	0	0	0	0	0	0	0.1871	0	10.403	5.1468	2.5154	2.5321	5.7975	8.3932	4.7307	11.5453	4.9782	6.3791	2.2398	13.1339	34.9567	13.4937	17.1818	28.1087	13.057	17.631	10.9966
Spizellomyces_punctatus	3.1798	3.3742	13.1671	2.913	5.8724	3.171	6.1558	5.8084	5.6157	6.2139	0	0	0	0	0	0	0	0	0	0	0	0	0	0	0	0	0	0	0	0	13.2288	10.7332	4.3547	5.0807	9.9886	11.3326	8.1086	15.9901	8.3608	8.8142	3.7825	11.9955	36.4718	10.9733	17.7329	26.5492	12.9362	24.5768	10.5438
Paenibacillus_sp._IHB_B_3415	3.0436	4.1522	15.9079	27.2011	53.7585	40.1608	49.4345	10.0952	18.7896	10.8365	0.176	0	0	0	0	0	0	0	0	0	0	0.1993	0	0	0.0355	0	0	0	0	0.0277	0.4284	0.3333	0.1981	0.088	0.2449	0.6498	0.6315	0.8281	0.2633	1.059	0.1521	9.9775	29.921	9.7521	13.9297	24.2264	13.4399	17.2466	8.4602
Microbacterium_arborescens	8.2636	8.9893	36.9653	3.1595	4.2906	5.0365	5.3383	14.7342	26.7201	18.5587	0	0	0.0413	0	0	0	0	0	0	0	0.0301	0	0	0	0	0	0	0	0	0	10.8976	7.6906	2.8497	3.4395	8.145	11.0698	5.6618	10.9822	4.4523	6.5994	2.6914	9.9989	22.6107	9.8029	15.0375	19.8921	8.7208	18.6899	8.6022
Saitoella_complicata	1.0553	3.1504	7.3943	1.4452	0.884	1.0981	2.7496	10.0571	29.3377	9.8092	0	0	0	0	0	0	0	0	0	0	0	0	0	0	0	0	0	0	0	0	4.8404	2.3977	0.9709	1.9403	1.9752	3.8047	3.5182	4.4472	2.8464	3.0515	1.7105	13.3518	36.3158	9.383	16.5982	35.1781	10.7389	19.6272	9.2742
Aeromonas_hydrophila	3.1253	4.1127	15.1523	3.8721	5.5744	5.2204	5.2141	8.7465	16.7573	14.5273	0	0	0	0	0	0	0	0	0	0	0	0.0651	0	0	0	0	0	0	0	0	11.2014	6.5931	2.3677	2.4068	6.0239	7.3123	5.6295	11.0442	4.2737	7.7668	2.9181	8.6848	32.8484	8.6422	11.5116	18.9315	8.7225	18.3085	6.7712
archaeon	1.9026	1.5463	5.2099	11.9266	24.0851	19.2924	22.0066	7.7057	11.3199	8.0116	0	0	0.0464	0	0	0	0	0	0.0778	0	0	0	0	0	0	0	0	0	0	0	2.4101	0.1838	0.728	0.4894	2.047	1.4242	2.1573	2.4679	0.8211	1.7927	0.6987	6.699	27.4702	11.5568	11.784	20.446	10.5584	15.0811	6.4697
Acinetobacter_idrijaensis	1.8173	3.5668	13.3386	3.9265	7.4901	5.3595	5.4425	5.6792	12.4953	5.5701	0	0	0	0	0	0	0	0	0	0	0	0	0	0	0	0	0	0	0.3191	0	8.1519	9.3461	2.7149	2.7054	6.1684	8.1121	4.882	14.6906	3.6035	6.4592	2.4412	8.098	21.8708	7.4043	13.0336	23.1998	8.9378	20.9047	6.671
Bacillus_sp._XXST-01	1.4331	3.7216	4.9384	4.0513	6.2547	5.2265	6.8051	12.0029	24.056	17.7192	0	2.2028	0	0	0	0	1.5716	1.9804	0	0	0.3415	0	1.8824	0	0	0	0	0	0	0	10.002	4.3186	2.5528	2.5148	4.105	8.3426	7.9006	9.0365	3.5539	4.6455	2.752	5.8452	18.8415	5.8103	8.9685	22.1295	9.7375	12.873	7.1279
Tissierella_creatinini	2.0989	0.8059	8.6597	5.0376	10.8677	7.8566	8.6861	8.8533	14.763	12.8247	0.7126	2.4356	0.5967	0.2693	0.214	0.4949	0.0799	0	0	0.3029	1.6977	0.9353	0	0.6147	0	2.4822	0.1872	0	0.8034	0	3.3414	2.6983	0.4718	1.5001	2.8165	9.1278	2.5076	4.1322	1.1612	3.5636	2.0657	6.8635	22.332	9.0898	11.1273	19.4451	9.7707	17.0905	7.2967
Candidatus_Chloroploca_sp._M-50	0.1267	0.1004	0	0	0	0	0	0	0	0	0	0	0	0	0	0	0	0	0	0	0	0	0	0	0	0	0	0	0	0	0	0	0	0	0	0	0	0	0	0	0	10.8841	26.2316	10.4184	17.2953	20.8489	7.6345	17.0606	8.5847
Syncephalis_pseudoplumigaleata	1.4974	1.7034	6.6429	1.4389	5.4776	4.4604	2.9146	9.8322	18.2161	12.2602	0	0	0	0	0	0	0	0	0	0	0	0	0	0	0	0	0	0	0	0	5.5216	4.3776	0.7598	0.9093	2.0449	1.3016	1.2385	4.5162	1.5945	4.1613	1.1755	6.736	17.5268	5.8313	9.8603	14.6866	6.0953	12.3541	5.1803
Spizellomyces_sp._'palustris'	1.4751	1.517	8.2033	4.6435	12.3352	9.2969	10.7197	3.1652	2.5561	2.0355	0	0	0	0	0	0	0.3125	0	0	0	0	0	0	0	0.1808	0	0	0	0	0	0.4931	0.2226	0.283	0.3957	0.3174	0.8124	0.2915	0.3644	0.3604	0	0.2166	6.9545	22.7963	6.7215	12.8605	14.2416	6.5398	14.9005	4.2431
Pseudarthrobacter_sp._AG30	0.1069	0.1588	1.2778	1.5511	2.3217	2.2092	2.385	2.1316	3.1578	2.1549	0	0	0	0	0	0	0	0	0	0	0	0	0	0	0	0	0	0	0	0	0.0799	0.1425	0.0541	0.032	0.0677	0.0771	0.1555	0.2332	0	0.1275	0.0693	7.0772	21.3279	6.6379	11.0969	18.6047	9.2235	16.3535	5.3275
Oceanicella_sp._SM1341	0.2287	0.0508	0.4545	2.0404	4.0239	2.0644	2.8496	0.169	0.3028	0.8746	0	0	0	0	0	0	0	0	0	0	0	0	0	0	0	0	0	0	0	0	0	0	0.0461	0	0	0	0	0	0.0983	0.1361	0	8.3251	22.7927	7.271	7.8742	16.7938	8.0798	11.84	4.8933
Crocosphaera_chwakensis	0.2818	0.1489	1.8302	0.8079	0.8465	1.6069	2.3089	3.4856	7.0011	4.5696	0	0	0	0	0	0	0	0	0	0	0	0	0	0	0	0	0	0	0	0	0.5618	0.6679	0.2219	0.2252	0.4762	0.7226	0.2915	1.0931	0.2027	0.5977	0.2437	6.4397	23.6977	7.7207	7.7651	15.7939	7.431	12.6431	4.7952
Schizosaccharomyces_pombe	1.4224	2.0687	6.2524	0.5402	2.57	1.4289	0.4003	6.8825	15.5027	8.425	0	0	0	0	0	0	0	0	0	0	0	0	0	0	0	0	0	0	0	0	2.5927	1.6623	0.7564	0.5865	0.8555	2.3555	1.3397	2.3602	0.8048	1.5239	0.6213	7.274	22.7799	6.9598	7.3696	13.0502	5.9502	11.2051	6.9673
Allomyces_macrogynus	1.572	2.7113	8.9845	17.6324	34.4401	27.2039	33.0392	6.1101	6.968	4.6394	0	0	0	0	0	0	0	0	0	0	0	0	0	0	0	0	0	0	0	0	2.2102	3.1493	0.6919	0.4743	2.1423	2.6223	1.0047	1.0918	0.4977	2.0978	1.0999	5.3736	15.4409	3.8965	6.688	9.5085	4.9442	8.2883	3.1659
Linderina_pennispora	0.4414	0.7178	1.2341	0.6579	0.9283	2.695	2.5603	4.5114	7.7151	5.4998	0	0	0	0	0	0	0	0	0	0	0	0.0418	0	0	0	0	0	0	0	0	0.4049	0.6193	0.3291	0.1114	0.9418	1.072	1.2975	1.8243	0.2005	1.1822	0.6627	6.0491	19.8082	5.4841	9.2796	9.2599	7.1544	13.1337	4.1517
Diversispora_epigaea	0.4753	0.3288	0.3813	0.9682	2.9201	3.5336	2.3006	2.7861	5.7934	2.384	0	0	0	0	0	0	0	0	0	0	0	0	0	0	0	0	0	0	0	0	2.4516	2.8582	0.5284	0.4123	1.3465	1.76	1.8008	3.394	2.0449	1.7645	1.1124	5.1524	20.0173	6.1564	8.0245	11.9988	4.9621	12.4792	4.4144
Deltaproteobacteria_bacterium	1.2153	1.6378	7.7387	1.0355	1.7894	1.1613	1.811	3.9042	7.8965	5.0278	1.8871	0	0	0	0	0	0	0	0.1031	0	0.1844	0	0	0	0	0	3.2778	0	0	0	1.3397	0.7407	0.2253	0.1998	0.5167	0.7479	0.6904	1.2395	0.5391	0.2361	0.3363	5.3692	16.6791	5.3555	8.8877	12.2774	4.144	12.7782	3.6111
Eukaryota_unclassified	1.2163	1.6242	4.4244	1.8512	2.3832	3.1176	2.5764	6.8703	16.6237	11.2298	0	0	0	0	0	0	0	0	0	0	0	0	0	0	0	0	0	0	0	0	1.1503	0.188	0.2234	0.1788	0.9475	0.6365	0.3998	1.0585	0.3378	1.1416	0.6143	3.2638	11.6269	3.2543	5.1058	9.1144	3.3356	7.0193	2.4845
Smittium_simulii	0.3967	0.4716	2.4453	2.8318	4.2897	4.3433	4.9267	12.0707	17.4363	11.9448	0	0	0	0	0	0	0	0	0	0	0	0	0	0	0	0	0	0	0	0	1.2813	0.9309	0.3213	0.3424	0.9653	1.3276	1.1081	1.6619	1.0959	1.0097	0.5351	3.4943	10.1332	4.0599	6.211	8.3521	4.8358	7.6214	2.8873
Rhizopus_microsporus	1.2977	1.0609	3.3419	6.7958	16.1139	12.0604	18.0797	6.3632	9.5108	5.2158	0	0	0	0	0	0	0	0	0	0	0	0	0	0	0	0	0	0	0	0	2.6954	1.5174	0.5423	1.0873	1.4302	1.886	1.8633	1.5148	0.8174	3.0901	1.0453	2.8761	12.1711	2.5848	4.6134	8.4124	4.386	7.6604	3.0036
Holophagae_bacterium	0.0258	0.0153	0	0.4713	0.7967	0.6617	0.8006	0	0.0824	0.1981	0	0	0	0	0	0	0	0	0	0	0	0	0	0	0	0	0	0	0	0	0	0	0	0.0155	0	0	0	0	0.0835	0	0	4.5266	14.8655	5.3304	6.78	11.8757	6.224	9.5352	4.0663
Ceratobasidium_theobromae	0.1059	0.1052	0.7513	0.0764	0.4097	0.6056	0.2067	0.719	0.7855	1.2199	0	0	0	0	0	0	0	0	0.0425	0	0	0	0	0	0	0	0	0	0	0	0.158	0.1415	0.0714	0.0213	0	0	0.1637	0.0765	0.0383	0.1695	0.0455	4.5437	15.3508	4.8404	8.2327	9.7682	5.6722	9.3801	4.8978
Vibrio_vulnificus	0.6767	0.9507	1.6347	0.2646	1.4256	1.4033	0.9551	5.4791	11.3983	4.2532	0	0	0	0	0	0	0	0	0	0	0	0	0	0	0	0	0	0	0	0	4.2318	3.4451	1.557	1.0325	2.0272	2.6624	2.4346	6.1752	1.859	1.9574	1.7555	3.8344	10.5496	3.8782	5.331	12.8182	3.9822	6.276	3.4517
Powellomyces_hirtus	5.1772	6.1055	18.1737	5.79	8.7486	9.7599	12.3162	8.9146	12.1561	10.0134	0	0.4786	0	0	0	0	0	0	0	0	0	0	0	0	0	0	0	0	0	0	0.4687	0.2086	0.1812	0.0872	0.2021	0.6771	0.6117	0.8059	0.5798	0.2825	0.2033	2.8976	4.5609	2.0946	4.3994	6.7714	2.6457	3.4443	0.9979
Conidiobolus_coronatus	0.9622	2.3291	4.4159	5.6723	14.0719	9.699	11.1344	3.6907	10.4217	3.108	0	0	0	0	0	0	0	0	0	0	0	0	0	0	0	0	0	0	0	0	3.2991	1.6433	0.8284	0.2997	1.1184	1.7598	0.8936	4.2014	0.45	2.4378	0.7949	4.3728	9.2734	2.955	4.8766	9.6481	4.187	7.3267	2.6143
Mortierella_verticillata	0.707	1.3882	1.9757	0.849	2.0308	2.3291	2.1802	4.8439	3.8898	4.0112	0	0	0	0	0	0	0	0	0	0	0	0	0	0	0	0	0	0	0	0	0.2042	1.2167	0.6351	0.5339	0.7828	0.7414	0.6163	0.5168	0.1097	0.8383	0.8205	4.9811	10.6924	4.4132	7.2498	8.0498	4.9702	9.0869	2.5715
Thaumarchaeota_archaeon	0.0403	0.0479	0.2549	0.9896	2.2246	1.7121	1.9634	0.591	0.7908	0.3903	0	0	0	0	0	0	0	0	0	0	0	0	0	0	0	0	0	0.0126	0	0	0.2182	0.1421	0.0754	0.0933	0.247	0.2009	0.2055	0.3308	0.1284	0.1616	0.0903	4.6363	14.7255	4.023	7.3972	11.6971	5.0309	7.7792	3.8119
Aestuariibacter_sp._GS-14	0.2115	0.2095	0.3746	0.1516	1.0209	0.402	0.8207	0.5231	1.1258	0.8122	0	0	0	0	0	0	0	0	0	0	0	0	0	0	0	0	0	0	0	0	0.527	0.188	0.1427	0.1268	0.2233	0.5084	0	0.1538	0.1521	0	0.0229	4.4298	14.0668	4.5414	7.3189	11.4011	5.2754	9.5126	3.447
Gigaspora_rosea	0.8433	0.5099	2.5558	5.4801	12.0066	9.9399	10.4391	3.7148	5.9409	6.5913	0	0	0	0	0	0	0	0	0	0	0	0	0	0	0	0	0	0	0	0	1.7745	1.5572	0.7275	0.418	1.9014	2.8249	2.5574	3.2275	1.5315	1.2891	1.1766	3.6368	10.4851	4.9162	3.752	6.3043	3.8902	5.7084	3.0723
Saccharospirillum_mangrovi	0.4928	1.7764	3.4724	1.0605	3.1368	2.5652	2.8714	9.6389	14.4558	7.6313	0	0	0	0	0	0	0	0	0.1044	0	0	0.1334	0	0	0	0	0	0	0	0	3.5574	4.5264	1.3219	1.0441	1.9857	3.3486	2.7027	5.4472	2.694	3.7409	1.6936	2.0202	8.2384	3.6586	3.6435	5.2527	3.2091	8.4501	2.0024
Glomus_cerebriforme	1.1948	1.8169	5.0333	3.8773	7.1669	6.7084	6.673	3.2907	9.5198	5.2589	0	0.2244	0	0	0	0	0	0	0	0	0	0	0	0	0	0	0	0	0	0	3.2289	1.6619	0.6517	1.0734	1.3549	1.7919	1.4107	3.785	1.1545	1.1025	1.2281	2.6364	9.1883	3.0761	5.2102	11.2454	4.3025	6.2056	2.9395
Rhizopus_stolonifer	1.7126	1.5572	5.9929	1.4312	1.8557	3.0507	2.1275	3.3324	6.7046	6.0056	0	0	0	0	0	0	0	0	0	0	0	0	0	0	0	0	0	0	0	0	2.5491	1.2586	0.3855	0.1602	0.9667	1.7311	1.7021	2.5358	0.4013	1.4187	0.7145	4.2174	8.024	5.1396	4.5567	7.4675	2.928	4.8656	1.8524
Pseudomonas_sp._2(2015)	0.6829	0.7064	2.3557	1.4581	3.1192	4.4278	3.8793	5.8167	8.7443	8.4226	0	0	0	0	0	0	0	0	0	0	0	0	0	0	0	0	0	0	0	0	3.7932	2.8757	1.0434	0.7042	1.689	2.344	2.6895	5.6587	1.6864	2.6996	0.7834	1.8924	6.9874	2.5467	4.4043	10.7365	4.5955	5.5734	1.879
Thamnocephalis_sphaerospora	1.0152	0.7703	3.5622	7.2186	16.5418	10.2302	11.2108	4.7656	6.4596	4.4961	0	0	0	0	0	0	0	0	0	0	0	0	0	0	0	0	0	0	0	0	1.4963	1.4557	0.366	0.0377	0.6488	0.4437	0.6591	0.3291	1.7607	1.1959	0.5355	3.8738	13.3856	2.8282	3.2617	5.8106	2.4167	5.3654	2.4682
Absidia_glauca	1.1845	1.6967	5.9191	18.5624	42.1669	30.7653	34.5503	1.2606	1.4458	1.3287	0	0.0333	0.0127	0	0	0	0.0423	0	0	0	0	0	0.0253	0	0	0	0	0	0	0	0.2822	0.3355	0	0.0754	0	0.0342	0.2196	0.549	0.4329	0	0.0816	2.0824	6.2616	2.2663	3.0665	3.2566	2.7582	2.9569	2.1658
Lactobacillus_harbinensis	0.8181	0.8565	3.4665	0.4497	1.4623	3.5044	2.7967	4.0381	8.2648	7.4486	0	0	0	0	0	0	0	0	0	0	0	0	0	0	0	0	0	0	0	0	3.4936	2.076	0.8246	1.089	2.6038	2.4853	2.6681	2.1231	2.0842	1.9377	1.5475	2.898	5.0722	2.1386	5.5581	10.9715	3.1308	6.0851	3.0776
Anaeromyces_robustus	0.5705	0.2644	3.6285	1.6298	2.604	2.7082	3.1006	4.5007	9.9716	3.9166	0	0	0	0	0	0	0	0	0	0	0	0	0.1023	0	0	0	0	0	0	0	1.8218	1.0209	0.6544	0.9664	1.295	1.2212	1.2994	2.2014	1.4307	1.2492	0.6576	3.2539	10.0203	2.0002	4.1097	6.8611	3.4013	6.1096	2.8008
Phycomyces_blakesleeanus	0.4099	0.6524	0.91	0.2957	1.052	1.3724	0.6646	4.8283	3.0665	2.8744	0	0	0	0	0	0	0	0	0	0	0	0	0	0	0	0	0	0	0	0	1.8468	1.5567	0.83	0.3281	1.1278	1.1826	1.1174	2.6949	0.2968	1.3042	0.1767	2.8295	8.8509	3.2153	4.4686	7.0834	5.328	7.1886	2.4742
Macrococcus_caseolyticus	4.1852	5.5675	19.6198	0.9302	2.3481	2.214	1.8471	4.4615	5.9209	4.0405	0	0	0	0	0	0	0	0	0	0	0	0	0	0	0	0	0	0	0	0	2.3972	2.7385	0.8621	1.111	1.9682	1.8066	1.8659	4.2632	1.5137	2.2314	0.8447	2.2376	6.3688	3.4366	3.8919	5.2188	1.6213	3.9393	2.4688
Nocardioides_sp._BN130099	0.1866	0.1076	0.2553	0.9909	3.221	3.023	4.0825	6.4116	11.7592	5.2672	0	0	0	0	0	0	0	0	0	0	0	0	0	0	0	0	0	0	0	0	0	0	0.0458	0	0.5806	0.7994	0.4278	0.3949	0.1953	0.3057	0.121	2.5845	9.7309	2.2019	3.5819	10.0461	2.4557	3.7016	2.2209
Hypsizygus_marmoreus	0.1096	0	0	0	0	0	0	0.1356	0	0.1403	0	0	0	0	0	0	0	0	0	0	0	0	0	0	0	0	0	0	0	0	0.1092	0.0974	0.037	0.0438	0.0926	0	0	0	0	0	0	4.098	11.0157	4.2667	4.8025	9.8139	4.0392	5.9001	3.9881
Glycocaulis_sp._ZYF765	1.0124	2.3855	5.5461	1.0398	6.0601	3.7352	7.6226	5.3884	4.4301	5.459	0	0	0	0	0	0	0	0	0	0	0	0	0	0	0	0	0	0	0	0	1.4503	1.8676	0.3191	0.4097	1.0142	2.5793	1.1338	1.0202	0.6113	1.3636	0.7017	1.7358	10.1248	1.6876	6.1136	4.338	3.4533	4.2408	2.5967
Molluscum_contagiosum_virus	0.616	0.7323	4.5328	0.3057	0.366	0.9458	0.9196	3.3411	5.7523	4.0041	0	0	0	0	0.5003	0	0	0	0	0	0	0	0	0	0	0	0	0	0	0	0.9921	0.7582	0.3838	0.2841	0.8408	1.7773	0.2206	0.6204	0.6137	1.0554	0.4917	2.6582	10.6479	2.7237	4.3895	6.4957	2.9395	4.23	1.7246
Chloroflexi_bacterium	1.6935	2.098	8.4503	0.5249	0.5445	0.9751	0.7429	1.0067	0.6557	0.1705	1.3185	4.521	0	0.1229	0	0.4649	0	0	0	0	0	1.0898	0	0.9754	0.1928	0.4047	0.7156	0	0	0.1378	1.5832	0.0592	0.0449	0.7499	1.0901	0.1017	5.2331	0.2906	0.3838	10.3118	0.427	2.8266	10.114	1.7973	2.7588	4.8613	3.1284	4.1361	2.056
Lobosporangium_transversale	0.8639	0.5523	1.7387	0.8673	1.9043	0.7499	2.7605	1.9303	5.0864	3.5085	0	0	0	0	0	0	0	0	0	0	0	0	0	0	0	0	0	0	0	0	1.0655	1.2098	0.2734	0.4997	1.5902	1.0078	1.9983	3.898	1.2084	2.64	0.5109	2.7546	10.868	2.5686	3.2347	7.3535	2.0054	5.6243	1.5227
Goodfellowiella_sp._AN110305	0.7084	0.3369	0	0	0	0.202	1.0998	4.7319	2.7156	3.2651	0	0	0	0	0	0	0	0	0	0	0	0	0	0	0	0	0	0	0	0	4.873	1.7002	0.9323	0.7644	1.0774	2.4526	1.1544	1.2367	1.0703	1.8031	0.7351	3.2379	7.9591	3.2837	3.5986	6.6033	1.5285	6.0224	2.3633
Prosthecomicrobium_hirschii	0.0594	0.3003	0.4738	0.0639	0.3443	0.2542	0.9227	0.9925	2.5631	1.0273	0	0	0	0	0	0	0	0	0	0	0	0	0	0	0	0	0	0	0	0	0	0	0	0.0178	0.1507	0.0857	0.1729	0.0648	0.0641	0	0.0385	3.2414	12.2128	3.1682	4.2179	7.6583	3.6869	6.4422	2.4109
Caulochytrium_protostelioides	0.4034	0.3869	2.2287	1.8209	2.6578	5.1423	2.8847	3.0167	7.8722	8.0406	0	0	0	0	0	0	0	0	0	0	0	0	0	0	0	0	0	0	0	0	3.8542	3.9944	0.8508	1.3202	1.1249	2.3241	1.4562	3.8055	0.9995	1.7566	0.7922	1.9804	5.3405	1.2906	5.2087	3.8187	2.1295	5.5266	1.4449
Marssonina_coronariae	0.1858	0.2761	0.2468	0.1997	0.3588	0.3973	0.5408	1.8959	2.6706	1.2487	0	0	0	0	0	0	0	0	0	0	0	0	0	0	0	0	0	0	0	0	0	0	0	0	0	0.134	0	0	0	0	0	4.1493	9.3378	2.0668	3.3308	8.1493	2.7559	7.897	1.9016
Mythimna_unipuncta_nucleopolyhedrovirus	0.172	0.1243	0.3584	0.5947	0.6256	0.2117	0.5499	1.4649	1.7028	1.6334	0	0	0	0	0	0	0	0	0	0	0	0	0	0	0	0	0	0	0	0	0.3127	0.198	0.0341	0.0243	0.0427	0	0.0785	0.0736	0.0728	0.1073	0.0919	2.8104	8.3181	3.1715	3.8417	6.9943	3.8946	5.7362	2.6044
Actinomyces_radicidentis	0.2805	0.3335	0.4969	0.2011	0.5417	0.2666	0	0.8675	0	0.8979	0	0	0	0	0	0	0	0	0	0	0	0	0	0	0	0	0	0	0	0	0.4195	0.2494	0.0947	0.1121	0	0.2698	0.6531	0.204	0	0.2975	0	2.137	9.4001	2.9474	3.353	6.6655	2.0176	5.5647	3.3322
Acinetobacter_junii	0.0632	0.169	0.0839	0.4076	0.7931	1.0359	1.1648	0.4103	0.7064	0.546	0	0	0	0	0	0	0	0	0	0	0	0	0	0	0	0	0	0	0	0	0	0.0842	0.016	0.0568	0.3203	0.1823	0.1839	0.4136	0.1364	0.201	0.082	3.0192	7.192	2.8994	5.3807	9.5271	3.7064	5.9085	2.2994
Xylaria_sp.	0.1309	0.3043	1.6323	0.4342	0.5602	0.9164	1.2473	2.5752	1.6717	0.4152	0	0	0	0	0	0	0	0	0	0	0	0.0784	0	0	0	0	0	0	0	0	0.8251	0.857	0.2275	0.3682	0.5911	0.8206	1.0196	0.5089	0.6139	1.5564	0.321	2.7245	7.0145	2.8322	3.0602	5.6776	3.2377	4.6552	2.2
Mortierella_elongata	0.3364	0.1029	0.5536	1.1232	5.0952	2.9666	6.5559	1.1389	1.6789	1.7597	0	0	0	0	0	0	0	0	0	0	0	0	0	0	0	0	0	0	0	0	0.5797	0.3759	0.0357	0.1056	0.268	0.7611	0.2461	0.1538	0.1902	0.3925	0.0686	3.1351	9.657	2.4534	4.1843	5.1637	2.6562	4.9724	1.9591
Synchytrium_microbalum	0.5459	0.2822	0	2.8394	5.9536	2.6053	5.059	5.2652	11.331	5.3582	0	0	0	0	0	0	0	0	0	0	0	0	0	0	0	0	0	0	0	0	0.7302	1.8872	0.3625	0.4095	1.4585	0.5396	0.961	0.7629	0.891	1.4241	0.6861	3.8525	4.499	1.2594	2.8803	3.5375	1.4874	3.6835	1.1965
Batrachochytrium_salamandrivorans	0.6574	0.5781	4.4119	0.3361	1.3434	2.417	1.4143	4.1937	8.8113	4.4899	0	0	0	0	0	0	0	0	0	0	0	0	0	0	0	0	0	0	0	0	1.3879	1.269	0.2799	0.8198	1.602	2.0346	0.6778	1.2191	0.6895	0.8331	0.2394	1.5059	5.4302	1.6503	2.2388	3.2514	3.7146	2.7739	1.9137
Gonapodya_prolifera	0.4703	0.9899	2.4637	0.1846	0.263	0.3601	0.8542	2.3787	2.7931	2.7166	0	0	0	0	0	0	0.0443	0	0	0	0	0	0	0	0	0	0.0259	0	0	0	0.851	0.5861	0.228	0.2361	1.1249	0.4337	0.512	1.1322	0.9	0.4748	0.3405	1.7805	7.3234	2.2699	2.1232	5.0774	2.4494	4.7496	1.7656
Absidia_repens	1.013	1.9477	5.4536	1.2659	3.3249	2.7592	3.087	2.5559	3.5583	3.1817	0	0	0	0	0	0	0	0	0	0	0	0	0	0	0	0	0	0	0	0	0.8414	0.4775	0.1667	0.1495	0.2958	0.6987	0.2177	1.5172	0.6158	1.3783	0.2876	1.8911	3.3717	1.5684	2.215	7.759	2.0616	4.7007	1.0149
Bifiguratus_adelaidae	0.428	0.4523	0	0.1446	0.7577	0.3768	0.1321	0.7665	1.9318	3.7564	0	0	0	0	0	0	0	0	0	0	0	0	0	0	0	0	0	0	0	0	1.4789	1.2026	0.6841	0.0996	1.8955	1.0138	0.6246	1.9617	0.3263	0.962	0.6466	2.2529	7.304	1.9404	3.111	5.1696	1.8775	4.1063	2.3555
Nostocaceae_unclassified	0.0172	0	0	0	0	0.0983	0.0669	0.1918	0	0.0662	0	0	0	0	0	0	0.068	0	0	0	0	0.0528	0	0	0	0	0	0	0	0	0.0515	0.0919	0	0	0	0	0	0	0	0	0	2.6134	6.3174	2.1087	3.3983	7.7476	3.0674	5.2005	1.6462
Pestivirus_A	0.6003	0	0.8191	0	0.2977	2.2379	0	4.9147	6.8805	1.8929	0	0	0	0	0	0	0	0	0	0	0	0	0	0	0	0	0	0	0	0	1.474	2.0119	0.3428	0.3137	0.5861	0.8894	0.609	1.4782	0.1663	0	0	0.1601	2.2786	1.4553	2.9453	8.2737	1.8269	2.5518	2.9647
Rhodobacteraceae_bacterium_CH30	2.5221	4.0904	16.9168	4.0307	9.9395	5.3894	5.2533	2.8834	6.0407	3.8858	0	0	0	0	0	0	0	0	0	0	0	0	0	0	0	0	0	0	0	0	0.2341	0.7989	0.236	0.1427	0.0855	0.0973	0.4831	0.7352	0.1544	0.4409	0.4611	0.7125	2.3721	1.1527	1.351	2.3831	1.0234	1.6706	1.1226
Arthrobacter_sp._D2	0.0935	0.1112	0.2485	0.6032	0.7223	1.4665	0.7259	1.735	1.7923	2.8733	0	0	0	0	0	0	0	0	0	0	0	0	0	0	0	0	0	0	0	0	2.2374	0.7481	0.4733	0.4484	1.4222	1.4838	1.9592	2.8567	0.2018	1.7851	0.3639	2.2342	6.0824	2.6007	3.9119	5.64	2.0176	3.5773	1.2053
Lichtheimia_ramosa	0.9868	0.8929	1.59	6.6308	12.8563	15.8227	11.0825	2.3005	4.3757	2.4657	0	0	0.0518	0	0	0	0	0	0	0.3176	0	0	0	0	0	0	0	0	0	0	0.6707	0.469	0.1721	0.2179	0.2155	0.2791	0.7609	0.371	0.3923	0	0.3308	0.6182	2.366	1.462	1.8833	1.4305	0.7195	1.7507	0.929
Candidatus_Dadabacteria_bacterium	0.094	0.0447	0.6994	0.2021	0.7262	1.0186	1.0946	0.6977	1.3214	1.0833	0	0	0	0	0	0	0	0	0	0	0	0	0	0	0	0	0	0	0	0	0.4499	0.2006	0.1142	0.0451	0.3336	0.2712	0	0.1641	0.1623	0.4188	0.1463	2.1094	7.5604	2.4054	3.2586	5.8764	2.3327	3.6764	1.7677
Sphaerosporella_brunnea	0.2075	0.3453	1.9848	0.7139	1.1219	1.3016	0.4832	2.002	4.5072	2.2315	0	0	0	0	0	0	0	0	0	0	0	0	0	0	0	0	0	0	0	0	2.9787	1.3279	0.4201	0.9453	1.683	2.5143	2.8982	2.8977	1.254	2.1126	0.6459	1.2933	6.3801	1.4619	3.1001	2.503	0.4477	2.9987	0.881
Hesseltinella_vesiculosa	0.2034	0.4327	1.9899	0.3802	0.7855	1.0841	1.3724	2.7231	2.8056	1.3582	0	0	0	0	0	0	0	0	0	0	0	0	0	0	0	0	0	0	0	0	1.0576	0.6286	0.1193	0.1413	0.2988	0.5101	0.1991	1.4021	0.0923	1.3126	0.3058	1.5895	4.3052	2.0335	1.0706	4.5182	1.1534	4.2984	1.3634
Chytriomyces_confervae	1.498	3.047	5.4054	0.6093	1.6361	0.8092	1.5009	1.9676	3.0149	4.2424	0	0	0	0	0	0	0	0	0	0	0	0	0	0	0	0	0	0	0	0	0.6955	0.3716	0.3804	0.45	0.8352	1.4925	0.8858	2.9076	0.9134	0.9134	0.3159	1.6557	3.3179	1.3156	2.3875	2.5784	2.5793	3.442	1.6459
Gluconobacter_sp._AC10	0.6411	0.4274	1.1027	2.4226	5.7978	6.0172	5.0616	0.938	1.5272	1.0896	0	0	0.0122	0	0	0	0	0	0	0	0	0.0127	0	0	0	0	0	0	0	0	0	0.0443	0.0281	0.0589	0.1877	0.072	0.0193	0.0725	0	0.0264	0.0108	1.5365	4.4716	1.4381	2.0112	2.8249	1.636	2.7199	1.1088
Rhizophagus_irregularis	0.4847	0.6903	1.5709	3.7886	8.8963	6.5727	9.3283	1.3946	3.3475	2.0749	0	0	0	0	0	0	0	0	0	0	0	0	0	0	0	0	0	0	0	0	0.6849	1.0994	0.1009	0.2525	0.8371	0.0959	0.3784	2.0461	0.464	1.3045	0.4274	1.8605	1.3371	1.2276	1.9893	2.9372	0.8669	2.8362	0.9176
Arthrobotrys_flagrans	0.3509	0.1665	0.5605	1.3606	3.2585	2.105	3.4793	0.7827	0.5576	1.0127	0	0	0	0	0	0	0	0	0	0	0	0	0	0	0	0	0	0	0	0	0	0	0.035	0	0	0	0	0.1508	0	0	0	1.3638	4.0858	1.6014	2.3744	3.0309	1.8194	3.5245	1.4669
Neocallimastix_frontalis	0.2338	0.5249	1.1043	0.5027	1.5048	1.2591	0.9073	1.4459	4.3148	2.993	0	0	0	0	0	0	0	0	0	0	0	0	0	0	0	0	0	0	0	0	0.9322	0.6234	0.2104	0.3114	0.5926	0.9742	1.0884	0.5668	0.5606	0.3306	0.5727	2.2666	7.0654	1.0114	2.1733	3.8455	1.6814	2.6499	0.9847
Laetiporus_sulphureus	0.0899	0.4632	0.9556	0.2578	0	0.2564	0.698	0	0.383	0.2302	0	0	0	0	0	0	0	0	0	0	0	0	0	0	0	0	0	0	0	0	0	0.1598	0.1214	0.0359	0.076	0.2594	0.1395	0	0.1294	0.1907	0	1.8058	5.494	1.3337	2.8658	4.1084	2.6675	4.5863	1.2271
Syncephalastrum_racemosum	0.5895	0.243	0.8473	0.3966	1.681	0.987	1.0254	0.7481	0.1303	0.9291	0	0	0	0	0	0	0	0	0	0	0	0	0	0	0	0	0	0	0	0	0.4907	0.2101	0.2042	0.1961	0.4064	0.4733	1.0455	0.884	0.9614	0.7609	0.2579	1.1506	5.0723	1.8742	1.5802	6.3024	0.8274	2.4407	1.0409
candidate_division_Zixibacteria_bacterium	0.0426	0.3041	0	0.6875	0.3293	0.1823	0.3309	1.503	4.6305	2.3744	0	0	0	0	0	0	0	0	0	0	0	0	0	0	0	0	0	0	0	0	0	0.0568	0	0	0.1081	0.0615	0	0	0.2301	0.0678	0.0553	1.2401	5.5463	1.1857	1.7198	4.3247	2.1273	4.893	1.293
Candidatus_Magnetomorum_sp._HK-1	0.0718	0.0569	0	0.5147	0.3698	0.1365	0.1858	0.6218	2.5997	1.379	0	0	0	0	0	0	0	0	0	0	0	0	0	0	0	0	0	0	0	0	0	0.1277	0	0	0	0	0	0	0	0	0	1.6411	5.2369	2.3078	2.0742	4.7248	1.8076	3.7645	1.0889
Kazachstania_naganishii	0.0314	0.0374	0	0	0	0	0	0.1167	0.2009	0.1208	0	0	0	0	0	0	0	0	0	0	0	0	0	0	0	0	0	0	0	0	0	0	0.0318	0	0	0	0	0	0	0	0	1.8295	7.4387	1.5161	3.1012	3.6213	2.2902	3.6094	0.6677
Synchytrium_endobioticum	0.3615	0.2363	0.1656	0	0.1204	0.438	1.306	1.2433	2.2896	1.0655	0	0	0	0	0	0	0	0	0	0	0	0	0	0	0	0	0	0	0	0	0.8845	0.4389	0.0855	0.1991	0.2142	0.2438	0.2407	0.7183	0.1824	0.5236	0.2154	1.2093	4.5089	1.8975	1.1397	3.506	2.0161	4.22	0.5839
Candidatus_Methanofastidiosum_methylthiophilus	0.1753	0.469	0.4659	0.4713	0.3386	0.6249	0.6805	1.1386	2.2404	2.6937	0	0	0	0	0	0	0	0	0	0	0	0	0	0	0	0	0	0	0	0	0.1311	0.1169	0.0444	0.0525	0.4444	0	0.2041	0.3826	0.3784	0	0.1137	1.8213	7.7758	2.2756	1.0478	4.5665	1.8915	3.1674	1.3294
Thermococcus_profundus	0.0879	0.1829	0.2337	0.1891	0.0849	0.3134	0.256	0.7343	0.4214	1.0133	0	0	0	0	0	0	0	0	0	0	0	0	0	0	0	0	0	0	0	0	0.1973	0	0.0445	0.0527	0.3901	0.0634	0.1024	0.1919	0.0475	0	0.0285	1.1876	3.6401	1.3859	2.4307	2.652	2.0754	3.6446	1.0335
Talaromyces_amestolkiae	1.6096	0.82	0.611	0.2472	0	0.9835	0	0	1.4691	0	0	0	0	0	0	0	0	0	0	0	0	0	0	0	0	0	0	0	0	0	0	0	0	0	0	0	0	0	0	0	0	1.1943	4.759	1.4922	2.0613	5.0432	0.3101	2.9322	1.2204
Sporocytophaga_myxococcoides	0.0877	0.0521	0.4659	0	0.0846	0.125	0.5104	0	0	0	0	0	0	0	0	0	0	0	0	0	0	0	0	0	0	0	0	0	0	0	0.1311	0.1169	0.0444	0	0	0.2529	0.102	0.1913	0.2365	0.0697	0.0284	1.3205	5.1839	1.1378	2.1611	3.8455	1.7142	5.5896	0.8641
Plesiocystis_pacifica	0.3884	0.2417	0.4051	0.2186	0.687	0.8694	1.1412	1.8859	3.2469	2.6978	0	0	0	0	0	0	0	0	0	0	0	0	0	0	0	0	0	0	0	0	1.216	1.1519	0.2572	0.3656	0.8373	1.173	0.769	1.8852	0.4936	1.1319	0.3296	1.4857	4.6902	1.6456	2.8691	3.742	2.0267	2.1139	0.7816
Wenzhouxiangella_sp.	0.0754	0.0896	0.4008	0.1622	0	0.43	1.3171	0.6996	0.9636	0.2896	0	0	0	0	0	0	0	0	0	0	0	0	0	0	0	0	0	0	0	0	0.3383	0.4022	0.229	0.0904	0.1912	0	0.5267	0.6582	0	0	0.0978	1.8018	3.7904	1.538	2.5914	2.0675	0.7119	4.4877	0.6861
Blyttiomyces_helicus	0.3263	0.2826	0.2796	1.6126	4.5941	1.3331	2.974	0.7235	1.3521	0.7488	0	0	0	0	0	0	0	0	0	0	0	0	0	0	0	0	0	0	0	0	0.3555	0	0.1805	0.285	0.3013	0.5144	0.1384	1.2969	0.036	0.3782	0	0.9934	2.3775	1.4643	2.1109	3.4439	0.9302	1.8507	0.6855
Bacteriodetes_bacterium	0.0169	0	0.5388	0.2907	0.5222	0.4819	0.7215	0.1254	0.2159	0.0649	0	0	0	0	0	0	0	0	0	0	0	0	0	0	0	0	0	0	0	0	0	0	0.0171	0.0203	0.0428	0.0488	0.0393	0.0738	0	0	0	0.9831	4.7966	1.8487	2.9793	2.8725	1.6408	1.7958	1.5119
Microbulbifer_sp._ZGT114	0.0694	0.055	0.246	0.0498	0.3576	0.99	0.539	0.6013	2.3661	1.8669	0	0	0	0	0	0	0	0	0	0	0	0	0	0	0	0	0	0	0	0	0.2769	0.1234	0.1172	0.0555	0.2347	0.2671	0.3772	0.303	0	0.2946	0.1201	1.1541	3.4217	1.03	2.0749	2.6652	1.5607	3.3451	1.1933
Koala_retrovirus	0.0825	0.1308	0.2923	0.1774	0	0.3921	0.6405	0.3062	0.1757	0.3169	0	0	0	0	0	0	0	0	0	0	0	0	0	0	0	0	0	0	0	0	0	0.3667	0.0835	0.033	0.2789	0	0.1921	0.12	0	0	0	0.6857	4.8789	1.2748	1.9724	3.7701	2.3737	1.4029	0.709
Gordonia_sp._AMA120	2.5657	2.5406	8.1079	0.2646	0.4752	0	0.7163	0.9132	1.1791	1.4177	0	0	0	0	0	0	0	0	0	0	0	0	0	0	0	0	0	0	0	0	1.104	0.3281	0.3114	0.1475	0.3119	0.71	0.2864	0	0.2656	0.9787	0.3192	0.8947	4.0016	0.9125	2.0221	5.3971	0.1659	0	0.7463
Debaryomyces_fabryi	0.6944	0.0825	1.476	0.1493	0.5364	0	1.617	0	0	1.6002	0	0	0	0	0	0	0	0	0	0	0	0	0	0	0	0	0	0	0	0	0.8307	1.111	0.4218	0.5827	0.528	1.4024	0.3233	0.6061	1.3489	0.2209	0	1.2984	5.3378	1.03	1.4524	1.1422	1.1237	2.0661	0.9477
Methylocaldum_szegediense	0.1923	0	0	0	1.4852	0	0	0.2178	0.4267	0.9017	0.3906	0	0.0982	0	0	0	0	0	0	0	0	0	0	0	0	0	0	1.5604	0	0	0	0.0783	0	0.0352	0	0	0	0.2561	0	0.0934	0.0866	1.2193	4.8585	1.3602	2.8364	1.2872	0.7914	4.1506	0.712
Ustilago_trichophora	0.0575	0.1507	0.0814	0.0329	0.7261	0.4051	0.0594	0.3704	2.1087	1.2089	0	0	0	0	0	0	0	0	0	0	0	0	0	0	0	0	0	0	0	0	0.5054	0.338	0.0855	0	0	0	0.1967	0	0.3648	0.1344	0	1.2013	3.4408	0.9801	1.0524	4.4125	0.7235	1.8876	0.6743
Penicillium_decumbens	0.374	1.4193	3.0323	0.5051	1.5275	0.8133	0.8466	3.4244	4.9309	3.4799	0	0	0	0	0	0	0	0	0	0	0	0	0	0	0	0	0	0	0	0	0.6022	0.6264	0.2548	0.2816	0.808	0.4841	0.1953	0.5126	0.2173	0.5338	0.2394	0.5926	2.1827	0.5911	0.4011	2.0239	0.5883	1.6403	0.7378
Rhodospirillaceae_bacterium_SYSU_D60009	0.2492	0.374	0.3869	0.3273	0	0.2768	0	0.6929	0.9723	0.8246	0	0	0	0	0	0	0	0	0	0	0	0	0	0	0	0	0	0	0	0	0.4244	1.0156	0.0246	0.0996	0	0.1993	0.1934	0.1508	0.1794	0	0	1.0493	3.9254	1.6617	1.3335	3.3377	1.5586	2.4843	1.1807
Moosepox_virus_GoldyGopher14	0.0518	0	0.2751	1.6137	4.9975	3.9847	3.9173	1.3445	1.4881	0.497	0	0	0	0	0	0	0	0	0	0	0	0	0	0	0	0	0	0	0	0	0.0774	0.207	0.0786	0.031	0.1312	0.1493	0.0602	0.1129	0.0559	0.0823	0.0336	1.2366	2.9076	1.0076	0.928	1.7028	1.396	1.9801	0.6279
Hydrocarboniclastica_marina	0.3127	0.0531	0	0	0.1725	0.5095	0.1734	0.9946	1.7124	0.1716	0	0	0	0	0	0	0	0	0	0	0	0	0	0	0	0	0	0	0	0	0.8016	0.3574	0.0452	0.2142	0.1132	0.6444	0.6239	0.7798	0.3857	0.2843	0.1159	0.0928	5.0188	1.7393	1.7352	2.9392	1.5662	1.519	1.1515
Violaceomyces_palustris	0.1747	0.1187	0.2653	0.1073	0	0.2847	0.3875	0.5557	1.1162	0	0	0	0	0	0	0	0	0	0	0	0	0	0	0	0	0	0	0	0	0	0.8957	0.1331	0.0505	0.1795	0.3796	0.7201	0.2324	0.2178	0.2155	0.6353	0	0.8296	3.9848	0.6016	0.9695	2.8738	0.6731	2.0157	0.7191
Aspergillus_nidulans	0.0295	0	0	0.3802	0.4552	0.168	0	0.6561	0.3765	0.4527	0	0	0	0	0	0	0	0	0	0	0	0	0	0	0	0	0	0	0	0	0	0	0	0	0	0	0	0.1286	0	0	0.0764	0.9183	2.788	0.4917	1.4088	2.1005	1.51	2.7556	1.2065
Thermobacillus_sp._ZCTH02-B1	0.0409	0.0324	0.0724	0.1171	0	0.233	0.0529	0.1011	0.87	0.2092	0	0	0	0	0	0	0	0	0	0	0	0	0	0	0	0	0	0	0	0	0	0.0363	0.0276	0	0.069	0.0393	0.0317	0	0	0.0433	0	1.0751	4.751	1.313	1.1394	3.1361	1.2855	1.5629	0.6608
Thermosynechococcus_unclassified	0.0995	0.0591	0.2643	0.4278	0.3842	0.3546	0.9653	0.646	0.9533	0.8597	0	0	0	0	0	0	0	0	0	0	0	0	0	0	0	0	0	0	0	0	0.2975	0.4642	0.0755	0.1193	0.3152	0.0718	0.1737	0.8683	0.3221	0.4748	0.1935	1.4467	6.3236	0.7839	1.5606	2.3182	0.2683	2.5371	0.4903
Roseobacter_sp._SK209-2-6	0.058	0.1378	0.308	0	0.4477	0	0	0.2151	0	0	0	0	0	0	0	0	0	0	0	0	0	0	0	0	0	0	0	0	0	0	0	0	0	0.139	0	0	0	0.253	0.2502	0	0	0.7225	2.3991	0.5373	2.2515	6.6739	1.4069	1.971	0.5273
Mycolicibacterium_moriokaense	0.1508	0.0896	0.6011	0.1622	1.3106	0.215	0.7317	2.5186	5.0589	1.1586	0	0	0	0	0	0	0	0	0	0	0	0	0	0	0	0	0	0	0	0	0.4511	0.4022	0	0.0904	0.3823	0.2176	0	1.3164	0.3255	1.3196	0.1956	0.7834	0.6689	0.769	1.352	3.7214	0.6102	2.2438	0.9148
Kwoniella_shandongensis	0.2398	0.1425	0	0	0.463	0.6837	1.8612	0.4449	2.2978	1.8418	0	0	0	0	0	0	0	0	0	0	0	0	0	0	0	0	0	0	0	0	0	1.2788	0.1214	0	0.4558	0.3459	0.5582	1.0464	0.7763	0.5721	0.311	0.4981	3.5445	0.8891	1.0747	3.9441	1.94	0	0.3636
Pedobacter_sp._CJ43	0.1792	0.0609	0	0.2201	0.1977	0.146	0.298	0.4749	1.4718	0.1966	0	0	0	0	0	0	0	0	0	0	0	0	0	0	0	0	0	0	0	0	0.3062	0	0.1036	0.0614	0.1946	0.5169	0.2979	0.2234	0	0.1629	0.1328	1.6485	3.9352	0.8542	1.0708	1.6841	1.4497	0.9792	0.8539
Rotavirus_C	0.1112	0.3087	1.1832	0.557	1.0006	0.4749	0.8619	0.412	0.7093	0	0	0	0	0	0	0	0	0	0	0	0	0	0	0	0	0	0	0	0	0	0	0.1974	0.0375	0	0	0.2141	0	0	0.12	0.177	0	0.9227	4.7109	0.9612	1.0506	1.625	1.0488	1.5753	0.9547
Gemmatimonadetes_bacterium_SCN_70-22	0.085	0.2021	1.1294	0	0	0.9696	0.4949	2.0505	2.9871	2.4488	0	0	0	0	0	0	0	0	0	0	0	0	0	0	0	0	0	0	0	0	0.5085	0.6801	0	0.1529	0	0.4905	0.7916	0.371	0.1835	0	0.2205	0.0883	2.5134	1.2609	0.762	0.4661	1.1464	1.2647	0.9668
Moorea_producens	0.0848	0.1511	0.7882	0.4556	0.5728	0.2417	0.2467	1.4939	2.8428	1.0579	0	0	0	0	0	0	0	0	0	0	0	0	0	0	0	0	0	0	0	0	0.507	0.226	0	0	0.2148	0	0	0.2774	0.0915	0.1348	0.1099	1.2326	2.5058	0.4714	1.013	1.8588	1.0858	2.3417	0.6426
Mucor_circinelloides	0.1092	0.2933	0.1873	0	0.1361	0.201	0.2736	0	1.5986	0.2707	0	0	0	0	0	0	0	0	0	0	0	0	0	0	0	0	0	0	0	0	0.1054	0.2913	0.2639	0.131	0.0893	0.2034	0.1804	0	0.3955	0	0.2286	1.5595	1.4795	1.4636	1.8321	1.7776	0.96	1.7977	0.4275
Sistotremastrum_suecicum	0.2834	0.2526	1.8823	0.7616	1.0944	1.01	0.9623	1.5773	2.263	2.0407	0	0	0	0	0	0	0	0	0	0	0	0	0	0	0	0	0	0	0	0	0.2119	0	0.1434	0.0425	0.3591	0.4088	0.6596	0.3092	0	0.6762	0.0459	0.4415	2.3039	0.6567	0.9526	0.7769	1.1464	1.0539	1.0205
Gracilimonas_amylolytica	0.042	0.0998	0	0	0.1622	0	0	0	0	0	0	0	0	0	0	0	0	0	0	0	0	0	0	0	0	0	0	0	0	0	0	0	0	0	0	0	0	0	0	0	0	0.698	3.4766	1.4794	1.7568	1.8421	0.4531	2.4991	0.8279
bacterium_TMED181	0.0128	0	0	0.0827	0.3466	0.1097	0.1493	0.4758	0.4915	0.197	0	0	0	0	0	0	0	0	0	0	0	0	0	0	0	0	0	0	0	0	0.0383	0	0	0.0154	0	0	0.0298	0	0	0	0.0166	0.7192	3.1842	0.7845	1.9922	3.3744	1.0028	2.1255	0.6805
Pseudooceanicola_lipolyticus	0.531	0.7307	2.5243	2.841	8.9203	5.7156	6.0949	0.596	1.0418	0.2056	0	0	0	0	0	0	0	0	0	0	0	0	0	0	0	0	0	0	0	0	0	0.0745	0	0	0	0	0	0	0	0	0	0.7285	1.0368	0.7585	0.5239	0.4807	0.5517	1.4906	0.5761
Actinocorallia_populi	0.1403	0.0417	0.1864	0.377	0.4063	0.3	0.2722	3.3833	6.497	2.4243	0	0	0	0	0	0	0	0	0	0	0	0	0	0	0	0	0	0	0	0	0.3146	0.2805	0.0355	0.042	0.0889	0.5058	0.1633	0	0.0757	0.3347	0.091	0.5828	2.0735	0.3901	0.6287	2.115	0.5675	1.0434	0.5317
Limimaricola_cinnabarinus	0.0626	0.1489	0	0	0	0.3571	0	0.4647	1.2002	0.2405	0	0	0	0	0	0	0	0	0	0	0	0	0	0	0	0	0	0	0	0	0.3746	0	0.317	0.0751	0.3174	0	0	0.8198	0.1352	0	0	1.1709	3.7028	0.8127	0.7484	0.3433	0.6755	1.0647	0.5697
Tulasnella_calospora	0.519	0.2272	4.7829	0.1169	0.4199	0.155	0.211	0	2.1003	2.1044	0	0.0626	0	0	0	0	0	0	0	0	0	0	0	0	0	0	0	0	0	0	0.3277	0.5844	0.1664	0.1971	0.2778	0.3162	0.2551	0.7174	0.2365	0.4352	0.2843	0.4553	1.944	1.5238	1.3098	1.5021	0.5911	1.6303	0.4985
Arthrobacter_sp._SX1312	2.1169	3.3346	7.0554	0.5585	1.3456	1.0371	0.6734	0.3359	0.6324	0.3258	0	0	0	0	0	0	0	0	0	0	0	0	0	0	0	0	0	0	0	0	0	0.1255	0.0315	0	0.043	0	0	0.0617	0.0305	0	0.0611	0.94	2.4247	0.6083	0.4648	1.7832	0.3509	1.3824	0.3045
Tremella_mesenterica	0.0815	0.1454	1.7335	0.263	0.9449	0.5813	1.4243	0.6052	2.0841	0.9397	0	0	0	0	0	0	0	0	0	0	0	0	0	0	0	0	0	0	0	0	0.8536	0.6524	0.1651	0.1466	0.4134	0.8235	0.8543	1.4236	0.176	0.9081	0.2644	0.8471	1.9289	1.3608	1.7057	0.8943	1.2097	0.1733	0.3092
Babjeviella_inositovora	0.1214	0.1805	1.1294	0.1306	0.2345	0.3463	0.3535	1.014	1.1638	1.1661	0	0	0	0	0	0	0	0	0	0	0	0	0	0	0	0	0	0	0	0	1.4528	0.5667	0.3381	0.2548	0.8465	0.1752	0.7068	0.795	0.3277	0.7728	0.4725	0.8831	1.4362	0.7881	1.1794	2.6635	1.0645	0.9034	0.4143
Wolfiporia_cocos	0.0907	0.1489	0.4819	0.7055	0.1083	0.4371	0.243	0.2324	0.7586	0.2405	0	0	0	0	0	0	0	0	0	0	0	0	0	0	0	0	0	0	0	0	0	0.167	0.0634	0	0	0.1807	0	0	0	0.5977	0	1.583	2.5149	1.1285	1.3801	1.5382	0.8093	0.5962	0.5728
Synechocystis_sp._PCC_7509	0.1104	0.0328	0	0.1781	0	0	0	1.0246	1.5877	0.4242	0	0	0	0	0	0	0	0	0	0	0	0	0	0	0	0	0	0	0	0	0.1652	0	0	0	0	0	0	0	0	0	0	0.9178	3.1022	1.0751	1.2376	0.6056	0.7447	1.291	0.8374
Psathyrella_aberdarensis	0.0701	0	0	0.1508	0.1354	0	0.2722	0	0.6721	0.1347	0	0	0	0	0	0	0	0	0	0	0	0	0	0	0	0	0	0	0	0	0	0	0	0	0.0889	0	0	0	0	0	0	1.1657	1.6588	0.3901	1.1526	2.3073	0.3783	1.1924	0.904
Hyphomonas_beringensis	0.0869	0.1723	0	0.1246	0.2239	0	0.3374	0.3226	0.1852	1.0018	0	0	0	0	0	0	0	0	0	0	0	0	0	0	0	0	0	0	0	0	0.1733	0	0.0293	0	0.0735	0	0.0675	0	0.0626	0	0	0.6623	1.3709	0.3761	1.9917	0.9534	1.4851	2.5869	0.9668
Desulfofundulus_unclassified	0.2039	0.1359	0	0.3136	0	0.1606	0.3475	0.652	1.1118	1.2158	0	0	0	0	0	0	0	0	0	0	0	0	0	0	0	0	0	0	0	0	0.0893	0.0796	0	0	0	0	0.1389	0.1302	0	0	0	1.0916	2.0581	0.5346	0.9608	2.0997	0.8538	2.0638	1.0357
Woolly_monkey_sarcoma_virus	0.0255	0	0.2711	0.0548	0	0.0727	0.2969	0.0946	0	0.4898	0	0	0	0	0	0	0	0	0	0	0	0	0	0	0	0	0	0	0	0	0	0	0.0258	0	0.1293	0	0.0594	0.1113	0	0	0.0331	0.7948	2.2621	1.4658	1.8289	2.2374	1.0317	0.8672	0.6188
Piptocephalis_cylindrospora	0.3309	0	0.4164	1.5861	1.6383	1.4514	2.744	0.4362	2.7253	1.3544	0	0	0	0	0	0	0	0	0	0	0	0	0	0	0	0	0	0	0	0	0.3515	0.4179	0.1587	0.3758	0.0993	1.1304	0.3648	0.171	0.1691	0.2493	0.1016	0.5698	2.3168	0.5812	0.9366	3.8669	0.634	1.6654	0.3565
Enhygromyxa_salina	0.0393	0	0.2088	0.0845	0.607	0.2241	0.1525	0.4374	0.3765	0.83	0	0	0	0	0	0	0	0	0	0	0	0	0	0	0	0	0	0	0	0	0.1175	0	0.0597	0.0236	0.249	0.4534	0.0915	0.3429	0.1696	0	0.051	0.3673	4.0658	0.8013	1.0566	1.1849	0.3709	1.8371	0.6256
Meiothermus_timidus	0.0967	0	0	0	0	0	0.3755	0.1795	0.618	0.1858	0	0	0	0	0	0	0	0	0	0	0	0	0	0	0	0	0	0	0	0	0	0	0.0979	0	0.1226	0	0	0	0.1044	0	0	1.0049	3.1461	1.1658	0.5781	2.9172	1.0436	1.2336	0.22
Phlebiopsis_gigantea	0.0458	0	0	0	0.3541	0.1307	0.3558	0	0	0	0	0	0	0	0	0	0	0	0	0	0	0	0	0	0	0	0	0	0	0	0	0	0	0	0	0	0	0.2	0	0	0.1784	0.1905	2.9816	1.0199	1.3697	5.0268	1.6072	2.533	0.7646
Candidatus_Sumerlaea_chitinovorans	0.0274	0.1303	0.2912	0.1178	0.1058	0.3125	0.1063	0.61	2.8004	1.7888	0	0	0	0	0	0	0	0	0	0	0	0	0	0	0	0	0	0	0	0	0.9832	0.7305	0.2219	0.1971	0.625	0.3162	0.2551	0.8369	0.2365	0.6101	0.1066	0.3415	1.944	0.4064	0.9005	1.5021	1.1083	0.4658	0.8308
Catenaria_anguillulae	0.2016	0	0	0.2344	1.4035	0.3108	0.4231	0.7041	0.2836	0.6036	0	0	0	0	0	0	0	0	0	0	0	0	0	0	0	0	0	0	0	0	0	0	0.0899	0	0.225	0.2561	0.2067	0	0	0	0.1151	0.72	2.5741	0.8894	1.3008	0.9501	1.3905	1.8322	0.1346
Paramicrosporidium_saccamoebae	0.2434	0	0.1921	0.3394	0.3303	0	0.1403	0.3174	0.5464	1.4782	0	0	0	0	0	0	0	0	0	0	0	0	0	0	0	0	0	0	0	0	0.3837	0.2281	0.0866	0	0.6504	0.2468	0.1991	0	0	0.1361	0	0.5532	3.1492	0.5362	1.9945	1.7308	0.5767	0.3073	0.6184
Thiothrix_sp.	0.0815	0.0969	0	0.3507	0.315	0.2325	0	0.1513	0	0.4698	0	0	0	0	0	0	0	0	0	0	0	0	0	0	0	0	0	0	0	0	0	0	0	0	0	0	0	0	0	0	0	0.7624	2.17	0.756	1.8276	1.7886	1.2097	1.2132	0.5565
Piromyces_sp.	0.0866	0.2059	1.1503	0.2793	0.6688	0	0.6721	0.6426	3.0425	2.3279	0	0	0	0	0	0	0	0	0	0	0	0	0	0	0	0	0	0	0	0	0.6474	0.8081	0.3944	0.1038	0.5487	1.1241	0.4031	0.1889	0.4672	0	0.2246	1.1693	1.024	0.8829	1.0349	1.899	0.5838	0.184	0.5908
Metarhizium_album	0.045	0.1069	0.9556	0.29	0	0	0	0.3337	1.1489	1.036	0	0	0	0	0	0	0	0	0	0	0	0	0	0	0	0	0	0	0	0	0	0	0	0	0	0.2594	0	0	0	0	0	1.0274	2.6584	1.0836	1.0747	1.972	0.485	2.1021	0.6135
Aureobasidium_pullulans	0.181	0.1076	0.2405	0.0973	0.8738	0.129	1.5805	0	0	0	0	0	0	0	0	0	0	0	0	0	0	0	0	0	0	0	0	0	0	0	0.1353	0	0	0	0	0	0.1053	0	0	0.2879	0	0.752	2.1404	1.0906	0.9464	1.7367	1.3424	1.5386	0.6175
Protomyces_lactucaedebilis	0.4472	0.8508	3.1652	0.1714	1.0387	0	0	0.5915	1.9728	0.6884	0	0	0	0	0	0	0	0	0	0	0	0	0	0	0	0	0	0	0	0	1.1918	0	0	0.1433	0.202	0.2299	0.4638	0.3478	0	0.5071	0	0.6623	5.4195	0.2216	1.1907	2.6219	0.4299	0.6775	0.2417
Leptolyngbya_sp._NIES-3755	0.0084	0	0.1341	0.0723	0.065	0.1918	0.0326	0.156	0.1612	0.2584	0	0	0.0371	0	0	0	0	0	0	0	0	0	0	0	0	0	0	0	0	0	0.1006	0.0448	0.0255	0.0202	0.0853	0.0728	0	0.1101	0.0545	0.0268	0.0109	0.8211	1.8398	0.764	1.8846	2.2593	0.5216	1.7157	0.7141
Verrucomicrobia_bacterium	0.115	0.1367	0	0	0.444	0.3278	0.4462	1.7066	0	1.7664	0	0	0	0	0	0	0	0	0	0	0	0	0	0	0	0	0	0	0	0	0.3439	0.6132	0	0	0	0.1659	0	1.2544	0	0.3658	0.1491	0.1194	1.6996	0.3198	0.6871	0	0.7752	0.9774	0.523
Nocardioides_sp._CCTCC_AB_2018079	0.1332	0.3694	0.7077	0.1909	0	0.2531	0.3446	2.1414	7.0897	3.7507	0	0	0	0	0	0	0	0	0	0	0	0	0	0	0	0	0	0	0	0	0.9293	0	0	0.1064	0.1125	0.6403	0.31	0.3874	0.1916	0.4237	0.2879	0.4611	1.3124	0.4115	0.5305	0	0.2394	0.3774	0.0673
Stenotrophomonas_maltophilia	0.1516	0.0451	0	0.2445	0.8785	0.5405	0.4414	0.7034	1.9376	0.5824	0	0	0	0	0	0	0	0	0	0	0	0	0	0	0	0	0	0	0	0	0.5669	0.3033	0.307	0	0.2883	0	0.706	1.6545	0.0818	0.4825	0.295	0.4726	0.8967	0.5623	1.5859	2.4944	0.6135	1.7726	0.4599
Thermoplasmata_archaeon	0.0525	0.0937	0.5584	0	0.1014	0.1498	0.3058	0	0	0	0	0	0	0	0	0	0	0	0	0	0	0	0	0	0	0	0	0	0	0	0	0.07	0	0.0315	0	0	0	0	0.0567	0	0	0.7094	4.815	0.487	1.3343	1.5843	0.7084	1.3398	0.5178
Sphaerobolus_stellatus	0.2292	0.4359	0.4872	0	1.2393	0	0	1.0206	1.1714	1.9366	0	0	0	0	0	0	0	0	0	0	0	0	0	0	0	0	0	0	0	0	0.5484	0.2445	0.0928	0.1649	0.5809	0.3967	0.3201	0.6001	0.1979	0.2917	0.1189	0.5714	1.6263	0.255	0.4109	1.0054	0.4945	0.3897	0.5561
Limnoraphis_robusta	0.0529	0	0	0	0	0	0	0	0	0.4066	0	0	0	0	0	0	0	0	0	0	0	0	0	0	0	0	0	0	0	0	0	0	0	0	0	0	0	0	0	0	0	0.4399	0.7825	0.3435	0.1582	2.7571	0.4283	1.6874	0.8829
archaeon_GW2011_AR4	0.0811	0.0482	0.6463	0	0	0	0.3147	0	0.777	0.3114	0	0	0	0	0	0	0	0	0	0	0	0	0	0	0	0	0	0	0	0	0.1212	0	0	0	0	0.4678	0	0.1769	0.2625	0	0.0526	0.4211	5.5135	0.2255	1.5748	1.3337	0.5467	2.0678	0.5533
Candidatus_Kentron_sp._FM	0.0095	0	0	0	0	0	0.0369	0	0.1214	0	0	0	0	0	0	0	0	0	0	0	0	0	0	0	0	0	0	0	0	0	0	0	0	0	0	0	0	0	0	0	0	1.1254	2.8097	0.8457	1.8457	2.1885	0.7433	1.8177	0.6485
Malassezia_pachydermatis	0.2175	0	0	0.2338	0	0.31	0	1.8157	2.0841	1.0441	0	0	0	0	0	0	0	0	0	0	0	0	0	0	0	0	0	0	0	0	1.3008	0.29	0.1651	0.1304	0.2756	0.3137	0	0.4745	0.4694	1.0379	0.141	0	0.643	0.2016	0	0.8943	0.8798	0	0.2473
Ardenticatena_maritima	0.4559	0.1667	1.1181	0	0.6772	0.1	0	1.5615	3.5846	1.4815	0	0	0	0	0	0	0	0	0	0	0	0	0	0	0	0	0	0	0	0	0.6293	0	0	0.2522	0.7111	0.607	0.4898	0.153	0	0.4463	0.091	0.4371	2.903	1.1053	0.4191	1.7305	0.1892	0.8943	0.2127
Gammaproteobacteria_bacterium_MedPE	0.1775	0	0.3695	0.1031	0.7222	0.2598	0.642	0.6584	1.4704	0.8656	0	0	0	0	0	0	0	0	0	0	0	0	0	0	0	0	0	0	0	0	0	0	0.0485	0	0	0.1384	0	0	0.0932	0	0.028	0.3338	2.9627	1.0089	0.609	2.7472	0.5625	0.7745	0.9778
Bythopirellula_goksoyri	0.1179	0	0	0	0	0	0.4575	1.3122	3.0122	1.3582	0	0	0	0	0	0	0	0	0	0	0	0	0	0	0	0	0	0	0	0	0.1763	0.3143	0	0	0	0.5101	0	0.7716	0	0.5625	0	0.2449	1.0455	0.4371	0.7044	0.9694	0	1.2526	0.3575
Rhodospirillaceae_bacterium_SYSU_D60014	0.0156	0.0557	0.166	0.1008	0.181	0.1336	0.0606	0.5217	0.499	0.12	0	0	0	0	0	0	0	0	0	0	0	0	0	0	0	0	0	0	0	0	0.0467	0.0417	0	0	0.0396	0	0.0364	0	0	0	0	0.649	1.3854	0.6661	0.5134	1.456	1.0953	1.7263	0.5685
Psilocybe_cyanescens	0.1206	0.049	0.6577	0.1639	0	0.2353	0.4681	0.1531	0	0.7923	0	0	0	0	0	0	0	0	0	0	0	0	0	0	0	0	0	0	0	0	0	0.11	0.2506	0.0989	0.4183	0	0.1921	1.9805	0.1781	0	0.3211	0.8376	0.6762	0.9594	0.2278	0.8704	0.4281	0.324	0.4094
Diaporthe_ampelina	0.0531	0	0.5647	0.2285	0	0.4545	0	0	0.3394	0	0	0	0	0	0	0	0	0	0	0	0	0	0	0	0	0	0	0	0	0	0.1589	0.1417	0	0	0	0	0	0	0.344	0.169	0	0.5519	0.6283	0.9851	0.7938	2.0393	0.5732	2.2584	0.6445
Schizosaccharomyces_japonicus	0.4926	0.1831	0	3.393	4.5144	5.465	6.1245	0	0	0.4993	0	0	0	0	0	0	0	0	0	0	0	0	0	0	0	0	0	0	0	0	0	0	0.0376	0	0.0941	0	0	0	0.1002	0	0	0.0965	1.3165	0.344	0	0.764	0.5256	0.3948	0.7039
Mesorhizobium_sp._LSHC420B00	0.1039	0.0618	1.1043	0	0	0.1481	1.613	0.3856	0	0.9977	0	0	0	0	0	0	0	0	0	0	0	0	0	0	0	0	0	0	0	0	0	0.1385	0.1052	0	0	0.1499	0	0	0	0	0	0.7555	1.8432	0.3853	0.6209	1.9939	0.7006	0.8833	0.7878
Cowpox_virus	0.2461	0.2925	0.8718	0	0.6336	0	0	0	1.5722	0.3151	0	0	0	0	0	0	0	0	0	0	0	0	0	0	0	0	0	0	0	0	0.368	0.6562	0.1246	0	0	0.5916	0.0955	0.358	0.4426	0.3915	0.2128	0.3408	2.1827	0.1521	0.6128	0.8995	0.4425	0	0.5597
Golovinomyces_cichoracearum	0.097	0	0	0	0	0.1093	0	0	1.1167	0.1418	0	0.5544	0.1526	0	0	0	0.2585	0.5429	0	0.3265	0	1.1136	0.1548	0.33	0.0499	0.2229	0	0	0	0.1554	0	0	0.0442	0.0721	0	0.1261	0	0.5252	0	0.2439	0.1914	0.4601	0.8731	0.902	0.592	0.6072	1.4233	0	0.8255
Caulobacter_radicis	0.1063	0.1895	0	0	0	0	0	0.1972	0.6789	0	0	0	0	0	0	0	0	0	0	0	0	0	0	0	0	0	0	0	0	0	0	0	0.1614	0	0	0	0	0.4637	0	0.5071	0	0.1104	5.6551	0.6896	0.4763	2.9132	0.5732	1.1292	0.3223
Fomitopsis_rosea	0.2461	0.0975	0.4359	0.0882	1.9008	0.4678	0.9551	0.6088	0.7861	0.7876	0	0	0	0	0	0	0	0	0	0	0	0	0	0	0	0	0	0	0	0	0.368	0.3281	0.1661	0.0492	0.104	0.8283	0.4774	0.537	0.6197	0.261	0.3192	0.1704	0.7276	0.2281	0.3677	2.2488	0.6637	0.8717	0.1244
Alphaproteobacteria_bacterium_HGW-Alphaproteobacteria-3	0.1179	0	1.2528	0	0	0	0	1.7496	1.1296	0.9054	0	0	0	0	0	0	0	0	0	0	0	0	0	0	0	0	0	0	0	0	0	0.3143	0.2387	0.0707	0	0.17	0.4116	0.5144	0.1272	0.75	0	0.7347	2.4395	0.4371	0.3522	0.3231	1.2716	2.0041	0.5362
Nitrospirillum_amazonense	0.0214	0.0254	0.1136	0.046	0	0.1219	0.083	0.7935	1.7759	0.7391	0	0	0	0	0	0	0	0	0	0	0	0	0	0	0	0	0	0	0	0	0	0	0.0433	0	0.0542	0.1234	0	0	0	0.068	0	0.3998	2.2758	0.674	0.4472	0.8207	0.7497	0.5453	0.4539
Rhodanobacter_denitrificans	0.0709	0.1119	0	0.4048	0	0.671	0.3654	2.201	5.2348	2.4175	0	0	0	0	0	0	0	0	0	0	0	0	0	0	0	0	0	0	0	0	0	0	0	0	0	0	0	0	0	0.2995	0.0765	0	0	0.0873	0	0.0653	0	0	0.1608
bacterium_TMED15	0.7926	2.0688	4.8834	0	0	0	0	0	0	0.132	0	0	0	0	0	0	0	0	0	0	0	0	0	0	0	0	0	0	0	0	0	0	0	0	0	0	0	0	0	0	0	0.4285	0.4066	1.3386	0.7191	1.131	0.2782	0.8768	0.1564
Lactobacillus_formosensis	1.9414	2.593	8.0425	0.0397	0.0849	0.0526	0	0	0	0	0	0.0425	0	0	0	0	0	0	0	0	0	0	0	0	0	0	0	0	0	0	0	0	0	0.0221	0	0.0532	0	0	0	0	0	0.4111	0.78	0.2446	0.3942	0.4822	0.3558	0.2804	0.5667
Caulobacter_sp._K31	0.0568	0.1013	0	0.0611	0.1097	0.081	0.2204	1.0537	0.3628	0.4362	0	0	0	0	0	0	0	0	0	0	0	0	0	0	0	0	0	0	0	0	0.2548	0.6057	0.115	0.2042	0.2879	0.1638	0.5949	0.7435	0.3064	0	0.1473	0.4719	1.3432	0.6844	0.6787	0.7784	0.3063	0.8448	0.3444
Rhizopogon_vinicolor	0.0458	0.0545	0	0.2957	0.177	0.1307	0.1779	0	0	0.1761	0	0	0	0	0	0	0	0	0	0	0	0	0	0	0	0	0	0	0	0	0	0	0	0	0	0	0	0	0	0	0	1.619	1.6263	0.17	1.3697	3.5187	1.2363	1.9484	0.278
Bhargavaea_cecembensis	0.0961	0.1142	0	0	0.3711	0	0	1.0695	1.8414	0.369	0	0	0	0	0	0	0	0	0	0	0	0	0	0	0	0	0	0	0	0	0.2873	0	0	0	0	0	0.2236	0	0.2074	0	0.2492	0.998	1.1362	0.3563	0.8612	0	0.5182	0.8167	0.7284
Salarchaeum_sp._JOR-1	0.03	0	0.1593	0	0	0.0855	0	0.1112	0.1915	0.2302	0	0	0	0	0	0	0	0	0	0	0	0	0	0	0	0	0	0	0	0	0	0	0	0	0	0	0	0	0	0	0	0.9963	3.1901	0.0556	0.7165	2.1364	0.485	1.1466	0.3636
Cryptococcus_neoformans	0.0742	0.1323	0.3944	0.2394	0.4299	0.1058	0.144	1.377	1.1854	0.5701	0	0	0	0	0	0	0	0	0	0	0	0	0	0	0	0	0	0	0	0	0.3329	0.2969	0.1503	0.0445	0.2822	0.1071	0.2591	0.1619	0.1602	0.3542	0.1444	0.3855	1.0971	0.5504	0.4435	1.0173	0.2002	0.4732	0.4502
Mitosporidium_daphniae	0.0911	0.2165	0	0	0.1759	0.1299	0.1768	0.507	1.7457	1.0495	0	0	0	0	0	0	0	0	0	0	0	0	0	0	0	0	0	0	0	0	0.1362	0.1214	0.1383	0.546	0.4617	0.2628	0.4241	0.1987	0.1966	0.2898	0.1772	0.5677	2.9622	0.0844	1.3608	1.2485	1.2283	0.5807	0.3453
Ignavibacteria_bacterium	0.0665	0	0.5299	0.1429	0	0.1895	0	0	0.2124	0	0	0	0	0	0	0	0	0	0	0	0	0	0	0	0	0	0	0	0	0	0	0.2659	0.1682	0.1594	0.0843	0.1918	0.1548	0.2901	0.1435	0.1058	0.1293	0.6906	2.3585	0.6779	1.0925	0.9112	0.1793	1.8367	0.5544
Terrestrivirus_sp.	0.1484	0.1323	0.3944	0.1596	0.4299	0	0.7201	0.8262	0.9483	0.9977	0	0	0	0	0	0	0	0	0	0	0	0	0	0	0	0	0	0	0	0	0	0.1979	0.1503	0.089	0.2822	0.2141	0	0.9717	0	0.5903	0.385	0.0771	0.8777	0.1376	0.6653	0	0.9007	0.3155	0.3376
Mycena_chlorophos	0.0331	0	0	0	0	0.1887	0.1284	2.087	3.3817	1.7788	0	0	0	0	0	0	0	0	0	0	0	0	0	0	0	0	0	0	0	0	0.1979	0	0	0	0	0	0	0	0.0714	0	0.0858	0.2749	0.5869	0.3067	0	0.7256	0.2677	1.4062	0.301
Enhydrobacter_sp._CC-CFT640	0.0452	0	0	0.0973	0	0.387	0.1756	0	0.8672	0.6951	0	0	0	0	0	0	0	0	0	0	0	0	0	0	0	0	0	0	0	0	0	0	0	0.0542	0	0	0	0	0	0	0	0	1.0702	0.6711	0.5408	1.2405	0.9763	0.3847	0.3431
Hyphomonas_unclassified	0.0681	0.0809	0	0	0.263	0.0971	0	0.379	1.0876	0.9153	0	0	0	0	0	0	0	0	0	0	0	0	0	0	0	0	0	0	0	0	0.1018	0	0.0345	0	0	0	0.1585	0	0.0735	0	0	0.2829	1.2079	0.5681	0.4069	0.3733	0.6428	0.7236	0.4646
Pseudoalteromonas_sp._CO348	0.1189	0.1413	0.4211	0.0852	0	0.226	0.4614	0	0.2531	1.3697	0	0	0	0	0	0	0	0	0	0	0	0	0	0	0	0	0	0	0	0	0	0	0	0	0	0	0.1845	0	0	0.3782	0	0.4939	1.4058	0.2939	0.7104	1.3035	0.7481	0.8421	0.3605
Acidobacteria_bacterium_13_1_20CM_3_53_8	0.0681	0.0809	0	0	0	0.0971	0	0.6317	0.2175	0.7846	0	0	0	0	0	0	0	0	0	0	0	0	0	0	0	0	0	0	0	0	0	0.0908	0	0.0408	0	0	0	0	0	0	0	0.2122	1.2079	0.505	0.5086	1.12	0.4591	1.1577	0.2065
Salinarimonas_sp._BN140002	0.0694	0.1238	0	0	0	0.792	0.2695	0.5154	2.2182	1.3335	0	0	0	0	0	0	0	0	0	0	0	0	0	0	0	0	0	0	0	0	0.4154	0.7407	0.1054	0.1665	0.264	0.2003	0.5658	0.303	0.5995	0.6628	0.1351	0.0721	0.8212	0.1931	0.2075	0.9518	0.4682	0.8855	0.1579
Elstera_cyanobacteriorum	0.0289	0.1029	0	0	0.3344	0.1646	0	0.1071	0	0.1109	0	0	0	0	0	0	0	0	0	0	0	0	0	0	0	0	0	0	0	0	0	0	0	0	0	0	0	0	0	0	0	1.559	3.0719	0.9632	0.9486	0.4747	0.6227	0.9814	0.4376
Mule_deerpox_virus	0.0444	0.1055	0	0.8113	1.6286	1.3922	0.6891	0.2471	0.4254	0.4262	0	0	0	0	0	0	0	0	0	0	0	0	0	0	0	0	0	0	0	0	0.0664	0.1775	0.1123	0	0.2813	0.3842	0.5167	0.2906	0.1916	0	0.1439	0.5994	0.5249	0.5349	0.5969	0.3651	0.419	0.3774	0.4039
bacterium_HR30	0.3449	0	1.222	0	0	0	0	0	0	0.8832	0	0	0	0	0	0	0	0	0	0	0	0	0	0	0	0	0	0	0	0	0	0	0	0	0	0	0	1.0035	0	0	0	0.4777	2.7194	0.8527	0	0	0	0	0
Elsinoe_australis	0.0708	0.2105	0	0.1523	0.8208	0.909	0.1375	0.2629	1.3578	0.2721	0	0	0	0	0	0	0	0	0	0	0	0	0	0	0	0	0	0	0	0	0	0.0945	0	0	0	0	0.1649	0	0	0.1127	0.1378	0.3679	0.6283	0.1313	0.7409	0.3884	0.5732	0.9034	0.376
Murine_osteosarcoma_virus	0.0394	0.0937	0.6281	0.0847	0	0.1123	0	0.7311	0.2517	0.1513	0	0	0	0	0	0	0	0	0	0	0	0	0	0	0	0	0	0	0	0	0.2357	0	0	0	0	0.1137	0	0	0.085	0.1254	0	0.1637	1.6309	0.0731	0.8241	0.8641	0.8501	1.1723	0.5377
Podospora_comata	0.0723	0	0	0	0.2792	0	0	0.2683	0.9239	0.2777	0	0	0	0	0	0	0	0	0	0	0	0	0	0	0	0	0	0	0	0	0	0	0	0	0.0916	0.2086	0	0	0	0	0	0.3755	1.9239	0.4692	0.4321	1.1893	0.78	1.2293	0.2741
Ferrovibrio_sp._K5	0.1397	0.0996	0.8909	0	0.3237	0	0	0.7258	1.2496	1.6098	0	0	0	0	0	0	0	0	0	0	0	0	0	0	0	0	0	0	0	0	0.3343	0.149	0.0849	0.1005	0.2833	0.2418	0.2602	0.4878	0.1206	0.4445	0.145	0.1742	1.1566	0.1036	0.0835	0.3064	0.3014	1.544	0.5932
Methylosarcina_lacus	0.0351	0	0	0	0	0	0	0	0	0	0	0	0	0	0	0	0	0	0	0	0	0	0	0	0	0	0	0	0	0	0	0	0	0.042	0	0	0	0	0	0	0	0.3643	1.0368	0.7802	0.8383	1.3459	0.5675	0.8943	0.319
dichloromethane-degrading_culture_LZ	0.0678	0.1611	0.3601	0	0	0	0.1315	0.2515	0.4329	0	0	0	0	0	0	0	0	0	0	0	0	0	0	0	0	0	0	0	0	0	0.8106	0	0.1372	0	0.0859	0.1955	0.0789	0.1479	0	0	0.1318	0.2112	0.2003	0.5654	0.5062	0.7431	0.2741	1.7282	0.1028
Pisolithus_tinctorius	0.1005	0.0896	0	0.3243	0.0971	0.215	0.3903	0.1866	0.1606	0	0	0	0.0369	0	0	0	0	0	0	0	0	0	0	0	0	0	0	0	0	0	0.0752	0	0	0	0	0	0	0	0	0	0.0326	0.47	1.6351	0.1864	0.4507	0.4135	0.2712	0.4274	0.2287
Nostoc_punctiforme	0.0355	0	0	0.0382	0.0686	0.1013	0	0.0659	0.1134	0	0	0	0	0	0	0	0	0	0	0	0	0	0	0	0	0	0	0	0	0	0	0	0	0	0	0	0	0.0775	0	0	0.023	0.5902	1.3649	0.395	1.008	0.4868	0.7183	0.5283	0.5385
Rhizoctonia_solani	0.0268	0.0636	0	0.1151	0.4135	0.3053	0.1039	0.0993	0	0	0	0	0	0	0	0	0	0	0	0	0	0	0	0	0	0	0	0	0	0	0.0801	0	0	0.0321	0.0679	0	0	0.1168	0.0578	0	0	0.1112	0.4749	0.3474	1.1998	0.8806	0.2888	0.6827	0.1624
Phycisphaeraceae_bacterium	0.1189	0.3297	0.4211	0	0.3061	0	0	0.7352	1.0126	0	0	0	0	0	0	0	0	0	0	0	0	0	0	0	0	0	0	0	0	0	0.237	0.2113	0.0802	0.095	0.4017	0.4573	0	0	0.2566	0.2521	0.0514	0	0.9372	0.1469	0.7104	0.869	0.3206	0	0.4807
Neurospora_crassa	0.0247	0	0	0	0	0.2817	0.0958	0	0	0	0	0	0	0	0	0	0	0	0	0	0	0	0	0	0	0	0	0	0	0	0	0	0	0	0	0	0	0	0	0	0	0.3078	1.6063	0.3663	0.7379	0.8124	0.0666	1.3646	0.2996
Bacillus_bataviensis	0.0252	0	0	0	0.2923	0.2877	0.0979	0.7489	0.8059	0.6783	0	0	0	0	0	0	0	0	0	0	0	0	0	0	0	0	0	0	0	0	0	0	0.0255	0	0	0	0	0.1101	0.0545	0	0.0327	0.3145	1.1934	0.2339	0.4523	0.83	0.4082	0.7506	0.1148
Diutina_rugosa	0.0344	0.2043	0.7308	0.1478	0.1328	0	0.2669	0.3827	0	0	0	0	0	0	0	0	0	0	0	0	0	0	0	0	0	0	0	0	0	0	0.3085	0.0917	0.0348	0.0824	0	0.1984	0.08	0.6001	0.0742	0	0.0446	0.2857	2.2362	0.1912	0.7191	1.6965	0.4636	0.7307	0.1564
Eastern_grey_kangaroopox_virus	0.075	0	0	0	0	0.2139	0.1456	0	0.4792	0.4321	0	0	0	0	0	0	0	0	0	0	0	0	0	0	0	0	0	0	0	0	0	0	0.0759	0	0.0951	0	0	0	0	0	0	0.1558	0.6653	0.6258	0.8965	2.262	0.6069	0.4783	0.455
Trichodesmium_erythraeum	0.0861	0	0	0.0925	0.1662	0	0.668	0	0	0	0	0	0	0	0	0	0	0	0	0	0	0	0	0	0	0	0	0	0	0	0	0	0	0	0	0	0	0	0	0	0	0.1788	2.2898	0.1596	0.5143	0.4718	0.8123	1.0973	0.1305
Yarrowia_lipolytica	0.0398	0	0	0	0	0	0	0.1479	1.2729	0.4592	0	0	0	0	0	0	0	0	0	0	0	0	0	0	0	0	0	0	0	0	0	0	0	0	0	0	0	0	0	0	0	0.1656	0.4713	0.5172	0.4763	1.0925	0.3224	0	0.1813
Moumouvirus	0.0415	0.0987	0	0.1785	0.8014	0.2367	0.4832	0.462	0	1.2751	0	0	0	0	0	0	0	0	0	0	0	0	0	0	0	0	0	0	0	0	0	0	0.168	0.0498	0	0	0	0.5433	0	0	0.0538	0.2587	0.4908	0.1539	0.496	1.8203	0.5596	0.7056	0.0629
Oligoflexus_tunisiensis	0.0266	0	0	0.2856	0.1026	0.0757	0.3093	0.0986	0.8486	0	0	0	0	0	0	0	0	0	0	0	0	0	0	0	0	0	0	0	0	0	0	0	0	0	0	0	0	0	0	0	0	0.4415	0.7854	0.394	0.4763	1.0196	0.2866	0.2258	0.4028
Candidatus_Heimdallarchaeota_archaeon	0.1533	0	0	0	0	0.2185	0.4462	0	0.4897	0.8832	0	0	0	0	0	0	0	0	0	0	0	0	0	0	0	0	0	0	0	0	0	0	0	0.0459	0	0	0	0.1673	0	0.2439	0	0.1592	0.2266	0.6395	0.4581	0.8405	0.1034	0.3258	0.1743
Hericium_alpestre	0.0283	0.1345	0	0.0608	0	0.0806	0.1098	0	0	0	0	0	0	0	0	0	0	0	0	0	0	0	0	0	0	0	0	0	0	0	0	0	0	0	0	0	0	0	0.061	0	0	0.3525	0.6689	0.1049	0	0.4652	0.3814	1.3223	0.2573
Desulfobacteraceae_bacterium_4484_190.2	0.0349	0.083	0	0	0.2695	0	0.2708	0.259	0.4458	0.268	0	0	0	0	0	0	0	0	0	0	0	0	0	0	0	0	0	0	0	0	0.4174	0.1861	0	0	0.0884	0.2013	0	0.3046	0	0	0.181	0.0725	1.2379	0.1294	0	0.5739	0.2823	0.4449	0
Archaea_unclassified	0.0323	0.0384	0	0.0695	0.8738	0.2765	0.6272	0	0.2065	0.2483	0	0	0	0	0	0	0	0	0	0	0	0	0	0	0	0	0	0	0	0	0	0	0	0	0	0.0932	0	0.141	0	0	0	0.2014	0.5733	0.1798	0.2897	1.0633	0.3487	0.8243	0.098
Geitlerinema_sp._PCC_7407	0.084	0	0.2232	0	0	0	0.163	0.1558	0.2683	0.1613	0	0	0	0	0	0	0	0	0	0	0	0	0	0	0	0	0	0	0	0	0	0	0	0	0	0	0	0	0	0	0	0.1745	0.4967	0.3115	0.6274	0.2303	0.5663	1.0711	0.3821
Edafosvirus_sp.	0.0494	0	0	0	0	0	0	0	0	0	0	0	0	0	0	0	0	0	0	0	0	0	0	0	0	0	0	0	0	0	0	0	0	0	0	0	0	0	0	0	0	0	0.292	0.2747	0.4427	0.5416	1.1989	0.4199	0
Acinetobacter_indicus	0.0422	0	0	0	0	0	0.164	0	0	0	0	0	0	0	0	0	0	0	0	0	0	0	0	0	0	0	0	0	0	0	0	0	0	0	0	0	0	0	0	0.1344	0	0	0.4996	0.6267	1.1362	0.9266	0.5697	0.3592	0.3203
Nostoc_linckia	0.0797	0	0	0.3427	0.1539	0	0.1547	0.5915	1.5275	0.6122	0	0	0	0	0	0	0	0	0	0	0	0	0	0	0	0	0	0	0	0	0	0	0.0403	0	0.101	0	0	0.1739	0.172	0.1268	0	0.0828	0.9425	0.1478	0.4763	0.6555	0.1075	0	0.1209
Rhodotorula_graminis	0.0238	0	0.379	0.0511	0	0	0.0923	0.4411	0	0.0913	0	0	0	0	0	0	0	0	0	0	0	0	0	0	0	0	0	0	0	0	0	0	0	0	0	0	0	0	0	0	0	0.5927	0.7029	0.1763	0.6393	1.1732	0.6412	0.6063	0.3966
Rhodospirillaceae_bacterium_SYSU_D60006	0.0701	0.2084	0.3727	0	0	0	0	0.2603	0	0	0	0	0	0	0	0	0	0	0	0	0	0	0	0	0	0	0	0	0	0	0	0	0	0	0	0	0	0.3061	0	0.2231	0	0	0.4147	0.2601	0.2096	0.3845	0	0.5962	0.1063
Planctomycetes_bacterium	0.0365	0	0	0	0	0	0	0	0	0	0	0	0	0	0	0	0	0	0	0	0	0	0	0	0	0	0	0	0	0	0	0	0	0	0	0	0	0	0	0	0	0.0759	0.432	0.5418	0.5457	0	0.6896	0.1553	0.0554
Azospirillum_brasilense	0.0271	0	0	0	0	0.1544	0	0.201	0	0.312	0	0	0	0	0	0	0	0	0	0	0	0	0	0	0	0	0	0	0	0	0	0	0	0	0	0	0	0	0	0	0	0.2813	0.3202	0.1506	0.2427	0	0.2191	0.9208	0.0821
Neofusicoccum_parvum	0.0632	0	0	0	0.244	0	0	0	0	0	0	0	0	0	0	0	0	0	0	0	0	0	0	0	0	0	0	0	0	0	0	0	0	0	0	0	0	0	0	0	0	0.2625	0.3736	0.0586	0.5664	0.6929	0.3408	0	0.0479
Nostoc_sp._HK-01	0.0723	0	0	0	0	0	0	1.0732	0	0.4165	0	0	0	0	0	0	0	0	0	0	0	0	0	0	0	0	0	0	0	0	0	0	0	0	0	0	0	0	0	0	0	0.1502	0	0	0	0	0	0	0.0548
Klebsiella_sp._2680	0.0417	0	0	0	0.1612	0	0	0	0	0.3207	0	0	0	0	0	0	0	0	0	0	0	0	0	0	0	0	0	0	0	0	0	0	0	0	0	0	0	0	0	0	0	0	0.2469	0.0774	0.1247	0.4578	0.2252	0.7098	0
Paenibacillus_phocaensis	0.0264	0	16.9537	0	0	0	3.0699	0.9784	0	14.7343	0	0	0	0	0	0	3.6915	1.3103	0.0316	0	0	0	0	0	0	0	0	0	0	0	0	0	0	0	0	0	0	0	0	0	0	0	0	0	0	0	0	0.1121	0
Tenericutes_bacterium_GWA2_38_26	0.0068	0	0	0	0	0	0	0	0	0	0	0	0.9217	0	0	0	0	3.853	0	0	0	0	0	0	0	0	0	0	0	0	0	0	0	0	0	0	0	0	0	0	0	0.0283	0	0.0379	0.5906	0.0747	0	0.1159	0
Lichtheimia_corymbifera	1.064	0.2759	1.807	4.6854	7.7592	5.6578	7.7125	3.0232	6.7824	4.2608	0	0	0	0	0	0	0	0	0	0	0	0	0	0	0	0	0	0	0	0	0.7027	1.1397	0.4757	0.5393	1.2989	0.8652	0.2501	1.484	2.4057	0.2705	0.1945	1.3811	8.4827	1.8301	1.4782	2.5895	1.847	5.631	1.8835
Neocallimastix_cameroonii	1.0638	1.2543	7.3882	15.7101	39.7207	29.7995	34.6904	0	0.175	0.2104	0	0	0	0	0	0	0	0	0	0	0	0	0	0	0	0	0	0	0	0	0	0	0	0	0	0	0	0	0	0	0	0.4553	1.944	0.8635	1.0642	1.6523	0.5911	0.8151	0.3323
Rhizoclosmatium_globosum	0.4365	0.2978	1.8815	2.2205	3.7493	2.5059	4.3145	1.5747	2.7005	3.7689	0	0	0	0	0	0	0	0	0	0	0	0	0	0	0	0	0	0	0	0	0.2468	1.4616	0.3371	0.5581	0.127	0.7226	1.4336	2.2506	0.3943	1.0594	0.6688	1.2122	4.728	0.9968	3.1562	1.8402	1.9031	2.6485	1.3604
Jimgerdemannia_flammicorona	1.7348	2.4353	10.5559	0.0887	0.7384	1.0473	1.4257	2.3376	4.6479	1.6698	0	0	0	0	0	0	0	0	0	0	0	0	0	0.165	0	0	0	0	0	0	0.5329	0.3597	0.3413	0.3234	0	0	0.7849	1.4715	0.4367	0.4291	0.1749	1.5411	3.9876	1.7505	2.6195	2.5883	1.6369	3.1531	0.8181
Candidatus_Entotheonella_palauensis	0.1559	0.2779	0.8282	0.6702	0.9029	0	0.9073	0.5783	0.9957	0.8979	0	0	0	0	0	0	0	0	0	0	0	0	0	0	0	0	0	0	0	0	0	1.039	0.1578	0.1868	0.1975	1.5738	0.5442	1.7004	0	0.2479	0	1.2952	1.8432	1.0114	1.6299	0.8545	1.0509	1.9874	0.2363
Planctomycetes_bacterium_Pan216	0.1135	0.1055	0.6031	1.4371	3.229	2.8692	2.7857	0.2471	0.1418	0.0852	0	0	0.1016	0	0	0	0	0	0	0	0	0	0	0	0	0	0	0	0	0	0	0	0	0	0	0	0	0	0	0	0	0.646	0.8172	0.7046	1.1356	1.5155	0.7454	0.8811	0.5239
Proteobacteria_bacterium	0.0888	0.1055	0.9435	0.1909	0	0	0.3446	0.6589	0.5672	0.6819	0	0	0	0	0	0	0	0	0	0	0	0	0	0	0	0	0	0	0	0	0.531	0.4735	0	0	0	0.2561	0	0	0	0	0	0.1844	3.1497	0.9876	2.1222	1.4603	0.7183	0.7547	0.8077
Brevibacillus_laterosporus	0.0415	0.296	0	0.5354	1.4425	0.355	0.6443	0.308	0.7954	0.1594	0	0	0	0	0	0	0	0	0	0	0	0	0	0	0	0	0	0	0	0	0	0	0	0	0	0.1197	0	0.3622	0	0	0	0.6035	1.9631	0.3078	0.868	2.2754	0.6716	0.882	0.3776
Dimargaris_cristalligena	0.1087	0	0	0.2338	0	0.31	0	0.4035	0.6947	0.4176	0	0	0	0	0	0	0	0	0	0	0	0	0	0	0	0	0	0	0	0	0	0	0.055	0.2607	0	0.1569	0	0	0	0	0	0.6777	0.3215	0.1008	0.3249	0.8943	0.5865	0.2311	0.4946
Rhodococcus_erythropolis	0.1189	0	0	0	0	0.1695	0	0	0	0	3.4757	0.8214	0	0	0	0.1935	0	0	0	0	0.5093	0.4551	0.5615	3.8901	0	0	0.1372	0	0	0	0.3555	0	0	0	0	0	1.1069	0.5188	1.1546	0.1891	0.0771	0	0	0	0	0	0	0	0
Pseudomonas_sp._FSL_W7-0098	0.5892	0	0	0	0	0	0	0	0	0	0	0	0	0	0	0.2076	0	0.0841	0	0	0	0	0	0	0	0	0	0	0	0	0	0	0	0	0	0	0	0	0	0	0	0	0	0	0.3237	0	0	0	0.0821
Bifidobacterium_biavatii	0.3137	0.6393	5.0011	0.3373	0.3462	0.575	0.6088	0.582	0.7158	4.9054	3.4069	0.3613	0.6916	0.0744	2.484	0.2553	2.2093	9.8829	1.503	0.2511	1.2001	0.3432	5.5041	1.1281	1.2783	2.5146	0.0517	0.2617	0	0.3586	6.9694	1.1353	16.1508	0	0.284	1.3575	0.1565	33.3455	1.4992	0.8555	3.8653	1.2569	31.4013	0.5401	5.5571	3.1943	4.049	10.953	4.417
Neocallimastix_californiae	0.5473	0.0613	0	1.2372	3.0777	1.8728	1.2894	0.3827	4.0958	1.868	0	0	0	0	0	0	0	0	0	0	0	0	0	0	0	0	0	0	0	0	0.9254	0.275	0	0.1855	0.2614	0.7439	0.5704	0.9002	0.4452	1.3126	0	0.8038	1.8296	0.8367	0.8863	0.8483	0.2782	0.3294	0.7626
Cyanothece_sp._PCC_7425	0.4909	0.8337	2.6089	0.1508	0.1354	0	0.1361	0.5205	0	0.4041	0	0	0	0	0	0	0	0	0	0	0	0	0	0	0	0	0	0	0	0	1.2585	1.0286	0.1775	0.3363	0.5333	0.4047	0.8163	1.8364	0.3784	0.4463	0.5913	1.2385	1.6588	0.8452	0.8383	2.3073	1.1349	1.0434	0.4254
Bovine_gammaherpesvirus_6	0.1657	0.3282	0.5869	0.9499	1.493	0.1575	1.929	2.2542	2.8225	1.2726	0	0	0	0	0	0	0	0	0	0	0	0	0	0	0	0	0	0	0	0	0.8258	0.1473	0.2236	0.2648	0.14	0.6373	0.2571	0.723	0.4768	1.5813	0.6446	0.1147	0.3265	0.3072	0.9901	0.3028	0	0	0
Caldithrix_sp._RBG_13_44_9	0.2461	0.2925	0.4359	0.3528	0	0.4678	0	0.3044	2.0962	0	0	0	0	0	0	0	0	0	0	0	0	0	0	0	0	0	0	0	0	0	0	0.1094	0	0	0.2079	0	0	0	0.177	0	0	0.5965	0.485	0.2281	0.3677	0	0.1106	0.523	0.2488
candidate_division_TM7_genomosp._GTL1	0.7563	0.0817	0	0.1478	0	0.1961	0	0	0.8786	0.2641	0	0	0	0	0	0	0	0	0	0	0	0	0	0	0	0	0	0	0	0	0.8226	0	0	0	0	0.1984	0.6402	0	0	0	0.1784	0.2857	0.8132	0.255	0	0	0	0.5845	0
Tetrapisispora_blattae	0.0845	0	0	0	0	0.2409	0	0.4703	0	0	0	0	0	0	0	0	0	0	0	0	0	0	0	0	0	0	0	0	0	0	0	0	0	0	0.1071	0	0	0	0	0	0	0.0878	0.4996	0.0783	0.2525	0	0.1139	0.7183	0.1922
Ruminococcus_sp._AF34-12	0.834	0.2473	77.7956	1.7696	5.5163	8.7478	146.685	143.816	6.4871	19.0837	17.2426	13.4972	1.082	0.9591	8.9184	4.8251	16.1113	10.5356	22.519	11.4987	18.9219	1.8685	9.5761	13.9688	13.3419	14.459	6.6479	2.6602	11.6503	7.6042	21.1842	7.0679	1.9044	1.8579	2.3113	9.1769	0.0707	33.0448	2.5504	10.1882	1.254	45.6288	186.063	5.0544	16.666	5.8597	10.412	15.1094	3.5274
Meira_miltonrushii	0.7296	0.7547	2.9045	8.1201	17.6801	13.6339	19.4192	5.8502	9.3426	8.5549	0	0	0	0	0	0	0	0	0	0	0	0	0	0	0	0	0	0	0	0	2.7695	2.499	1.1838	1.2975	3.1025	1.9121	2.3732	3.7182	1.0384	3.6196	0.932	3.0421	9.1491	2.0554	2.3203	4.365	2.0951	3.7724	2.1875
Lactobacillus_mucosae	2.0218	0.1341	1.1181	2.3389	1.2272	1.4018	1.5221	1.1951	0.224	0.1347	0.6278	0.7397	0.5154	0.0594	4.1726	1.158	0.1296	0	0.4252	6.6112	0.1103	0.2192	2.0284	0.1766	0.5716	0.1789	0.089	0.512	0.3524	0.2545	13.309	0	0.2079	0.4375	0.8	0	0	0.153	0.2271	0	0.1184	0	0.6306	13.7616	0	5.003	0	1.4906	0.5359
Aestuariimicrobium_kwangyangense	0.057	0.2711	0	0	0	0.6503	0	0.2116	0	0	1.6672	1.0506	0	0	0	0	0	0	0	0	0.9773	0.4366	0.6734	0	0.2602	0	0	0.333	0	0	0.3411	0	0	0	0	0	1.3273	0.9954	1.3538	0	0.2958	0	0.3372	0	0	0	0	0	0
Pectobacterium_phage_PP1	0.1275	0	0	0	0	0	0	0	0	0	2.2371	0	0.3749	0.6353	0.3366	0	0	0	0	0.9527	0.5464	0	1.8071	1.926	0.582	0.3252	3422.9	0	1.259	0.4535	0	0	0	0	0	0	0	0	0	0	0	0	0	0	0	0	0	0	0
Piromyces_sp._E2	0.7368	1.3906	4.4248	0.0695	0	0.1843	0.3763	5.2894	11.6659	7.626	0	0	0	0	0	0	0	0	0	0	0	0	0	0	0	0	0	0	0	0	0.0967	0.2586	0.0327	0	0	0	0	1.1284	0	0.3085	0.1258	0	0.7644	0.1198	0.1931	0.3544	0.3487	0.2748	0.049
Pararhizobium_haloflavum	0.5864	0.9847	1.4145	0.1806	0.4866	0.2395	0.652	0.9351	0.8049	0.5686	0	0	0	0	0	0	0.1263	0	0	0	0	0	0	0	0	0	0	0	0	0	1.0048	0	0.085	0	0.5322	0.1212	0.1955	0	0.1813	0.2672	0	0	1.2416	0.5451	1.3804	0.6908	0.2265	0.8925	0.3184
Traorella_massiliensis	0.5334	0.0326	3.7852	0.3085	1.4813	0.9374	13.6198	13.3104	0	4.1037	4.5849	2.517	0.2094	0.3243	0	1.0225	0.108	5.2759	0.1969	5.9971	1.5506	0.9413	1.1647	0.2759	1.1878	7.7294	2.0238	0	1.7383	0.5847	1.229	0	0.1664	0.1051	3.6588	5.6462	0.2574	0	0.1376	0.2029	3.4609	1.2438	1.296	4.3176	6.1887	1.5021	1.9399	8.3864	5.2124
Puccinia_coronata	0.0762	0.3625	0.8102	0.3278	0	0.2174	0.8876	0	0	1.1712	0	0	0	0	0	0	0	0	0	0	0	0	0	0	0	0	0	0	0	0	0	0	0	0	0	0.4399	0.3549	0	0	0.4851	0	0.3168	2.2539	0.2827	0.9111	0	1.2336	0	0.1156
Acinetobacter_baumannii	79.9004	56.9524	646.108	168.581	231.642	255.755	246.758	185.585	1967.15	1103.47	110.305	38.6533	28.4499	32.7699	109.469	10207.3	24723	44.8585	89.2876	109.93	49.6054	231.846	5027.67	59.6299	106.452	171.319	44.0316	165.933	120.301	41.6519	113.806	105.094	24.8854	99.4104	68.8424	81.0367	76.1799	171.821	251.81	51.1153	50.5618	310.74	436.278	113.46	140.457	658.231	145.989	324.81	95.1802
Klebsiella_phage_vB_KpnP_FZ12	0.0613	0	0	0	0	0	0	0.1518	0	0	0.837	0.3297	0.2705	28.1503	0.5397	0.233	0.4838	0.6986	0.049	1.2221	0.7009	0.2818	0.1449	1.4412	0.3266	0.1565	0.3776	0.5374	5362.22	0.3636	0	0.0545	0	0	0	0	0	0	0	0	2.1747	0	0	0	0	0	0.2757	0	0.093
Dichomitus_squalens	0.1858	0.4417	0.9873	0.1997	0.5381	0	0	0.6894	1.1869	0.8919	0	0	0	0	0	0	0	0	0	0	0	0	0	0	0	0	0	0	0	0	1.6669	0.867	0.047	0.3898	0.4709	0.938	0.3244	0.4054	1.0025	0.5911	0.0602	0.2895	3.845	0.4306	0	0.764	0.1253	0.5923	0.4226
Candidatus_Saccharibacteria_bacterium_TM7_G1_3_12A	0.0734	0	0	0	0.2836	0	0	0.2725	0	0	0	0	0	0	0	0.0598	0	0.2281	0	0.1372	0.236	0.2249	0	2.773	0	0	2.4582	0	0	0	0.5491	0	0.1859	0	0	0.4237	0.171	0	0.4755	0	0	0	0	0	0	0	0	0	1.392
Neglecta_timonensis	2.0084	0.2037	35.545	2.1907	2.3662	0	27.3152	11.6329	3.977	15.4084	6.4836	4.8745	0.8318	0.4716	0.2191	1.7594	0.7887	0.693	2.3798	8.0936	1.896	1.9584	1.8762	6.3381	2.1058	4.6196	0.2374	1.5919	3.2192	0.0421	2.8069	1.1862	0.042	0.2736	3.8599	3.5975	0.3848	8.1904	1.7778	0.5281	0.5773	4.6208	8.3216	4.2774	12.8555	3.4131	3.9013	8.0502	7.0168
Bacteroides_sp._A1C1	0.9114	0	27.993	0	0	6.4843	0	0	13.8181	12.1744	1.5777	0	1.184	0	0	0.3786	0.0418	0.0823	0	0	0	0.713	0	0	0	0.0135	0	0.1854	0	0.0848	0	0.099	0	0.0127	0.0941	0	0	0	0.0229	0	0	0.2084	0.0627	0	0.095	0	0	5.7234	26.9438
Pseudomonas_sp._TMW_2.1634	0.9033	0	0	0	0	0	0	0	0	0.1673	0	0	0	0	0	0	0	0	0	0	0	0	0	0	0	0	0	0	0	0	0	0	0	0	0	0	0	0	0	0	0.0455	0	0.3166	0	0.0819	0	0.1201	0.4075	0
Murine_leukemia_virus	1.5317	2.1213	6.8617	0.4297	0.941	0.768	1.2973	3.4037	4.6946	2.5051	0	0	0	0	0	0	0	0	0	0	0	0	0	0	0	0	0	0	0	0	8.5481	6.768	2.1656	2.4445	6.0618	6.9859	3.6002	7.6109	3.7811	4.4928	2.4044	1.9796	3.5093	1.408	2.9181	3.4077	1.8796	4.1958	1.7002
Synergistaceae_unclassified	62.7415	0	0.9637	0	0	0	0	0	0	0	0	1.4326	0	0	0	0	0	1.7892	0	0	0	0	0	0	1.4506	0	0	0	0	0	0	0	0	0	0	0	0	1.0818	0	7.5927	0	0	0	0	7.7272	0	0	0	0
Kosakonia_sp._S29	0.0892	0	0	0	0	0	0	0	0	0	0	0.1369	0	0.0987	0	0	3.0473	0	0	0.222	0	0	0.0702	0	0	0	0	0	0.2934	0.0529	0	0.1585	0.0301	0.0356	0	0	0	0	0	0	0.0771	0	0	0.1102	0	0	0	0	0
Thermothelomyces_thermophilus	0.1299	0.1544	0	0	0.7524	0.9258	0	1.4459	2.0744	2.4942	0	0	0	0	0	0	0	0	0	0	0	0	0	0	0	0	0	0	0	0	1.1653	1.039	0.3944	0.1557	0.823	0.3747	1.2094	1.7004	0.4205	0.4132	0.1685	0.4047	2.3039	1.0836	2.1344	2.1364	1.4011	1.9322	0.8862
Citrobacter_sp._wls613	0.0982	0.1473	0	0	0	0	0	0	0	3.9447	0	0	0	0.181	0	0	30.8462	0	0	0	0	0	0.5305	0	0	0	0.0839	0	0	0.1939	0	0.3351	0.0226	0.4792	0	0	0.2538	0	0	0.1421	0.4392	0	0	0.0828	0.2368	0	0	0	0.1102
Acidobacteria_bacterium	0.1864	0	0	0	3.3785	0.1324	1.9944	7.3056	2.3318	3.2471	8.9839	10.6152	0	0	0	15.0592	0.6586	7.4689	0.32	0.2495	10.0886	2.1483	16.7229	0	7.9258	0.3407	2.6984	5.0714	11.211	4.7515	0.794	0.2302	0.1747	17.1263	0.4796	3.1557	0.618	1.4951	0.3366	8.2503	0.3769	2.1034	17.5557	35.7071	3.8653	4.881	0.8769	2.1862	0.7747
Choanephora_cucurbitarum	0.181	0.1076	0	0.1946	0	0	1.0537	0.3358	1.7345	0.6951	0	0	0	0	0	0	0	0	0	0	0	0	0	0	0	0	0	0	0	0	1.0826	0.7239	0.3665	0.434	0.4588	0.6527	0.632	1.9747	0.1953	0.8638	0.1174	0.752	1.6053	1.0067	1.0816	2.9771	0	1.9233	0.2744
Dethiobacter_sp.	0.1323	0.1573	0.8204	0	0.1704	0	0	0	0	0	0	0	0	0	0	0	0	0	0	0	0	0	0	0	0	0	0	0	0	0	0.7915	0.6469	0.1563	0.2644	0.3354	0.9544	0.9755	1.155	0.4284	0.842	0.3147	0.2749	0.2608	0.2045	0.1977	0.2419	0.2974	0.4687	0.2007
TUpanvirus_soda_lake	0.1209	0.0479	1.071	0	0.3113	0	0.9386	0	0.2575	0.3096	0	0	0	0	0	0	0	0	0	0	0	0	0	0	0	0	0	0	0	0	0.3616	0.1075	0	0	0	0	0	0.3518	0	0	0.0523	0.2512	1.1917	0.3737	0.1204	1.326	0.1087	0.3427	0.489
Clostridium_sp._CAG:590	16.7447	0.495	6.9881	1.4661	2.7825	1.4998	5.0165	5.2243	9.1392	7.9561	9.5816	3.9862	3.1856	0.4602	2.4157	2.9765	8.8166	42.0707	15.6866	5.813	7.9494	2.1194	8.4521	3.531	6.2895	14.2224	1.0673	0.576	1.0093	0.9354	15.4692	2.9806	15.7309	0	3.959	3.6868	0.102	155.246	1.9868	1.813	4.1247	2.2586	59.9637	3.7129	20.3172	7.5708	5.9107	36.0477	10.4766
Ruminococcus_sp._AF18-29	0.1191	0.1311	20.0177	0.6372	1.3963	7.7939	40.5738	46.1232	0.5602	8.1267	11.7138	1.288	0.1524	0.0785	0.208	0.4283	1.8928	17.3669	0.5326	11.2768	1.0443	0.3655	2.925	0.1467	5.2631	10.3255	5.074	0.0395	0.6221	1.0603	7.0186	0.7506	0.7853	0.0811	0.1142	47.4234	0.5453	8.4023	0.3208	0.9483	6.7574	3.8464	2.6931	10.5687	7.1414	12.641	0.8757	13.4409	4.5642
Parasitella_parasitica	1.2801	1.893	3.1706	11.6721	15.2389	15.0607	14.2965	1.3819	1.2854	2.0223	0	0.0967	0	0	0	0	0	0	0	0	0	0.0463	0	0	0	0	0	0	0	0	0.3712	1.5695	0.1257	0	0.3146	1.0744	0.289	0.6727	0.7346	0.9873	0.3609	0.5158	1.2784	0.4881	0.3709	3.5677	0.1674	2.5019	1.3631
TM7_phylum_sp._oral_taxon_955	0.3308	0	0	0	0.453	0.0669	0.1272	0.2432	0	0.1259	0.5737	2.2456	0	0.1688	0.4413	0	7.0001	0.3157	0	0	0.9906	0.5145	0.1108	10.5808	0	0	6.2098	0.0747	0.579	1.1442	2.3278	0.4778	0.2232	0.0955	0.6937	0.2932	0.3426	0.5095	0.2025	1.771	0	0	0.3325	0.1215	0.3059	0	1.713	0	0.8394
Mitsuokella_multacida	3.1031	0.3977	5660.41	0.7181	1.4682	1.0141	3.5865	2.3014	2.1253	1.3133	0	40.3832	0.2003	0.0299	0	0.0574	0.4832	0.0632	0.8782	0.2523	0	0.4002	0.177	0.0957	0	0.8518	0.0966	33.0818	0.5254	0	0.8763	0.2472	0	0.8342	0.8465	85.0563	0.1089	0.1173	0.022	0.7969	0.0583	0.3882	53.5716	0.4665	0.3698	0.4625	0.3237	0.784	2.8924
Butyricicoccus_sp._AF10-3	20.1997	13.7513	62.2933	28.0222	21.2234	34.748	58.5493	53.3505	14.9072	33.5812	21.3103	4.4619	12.2732	3.2398	16.9851	10.4669	25.4516	54.5864	55.2841	21.7586	12.0101	5.9202	38.1984	15.7304	58.8769	29.9982	5.9996	52.2848	3.1685	7.8665	24.2566	29.9734	10.4882	1.7219	56.9557	29.0967	1.0945	40.3678	21.6523	9.5601	31.9978	14.3551	134.965	16.1249	45.5625	21.3216	5.9688	45.6222	5.9811
Propionibacteriaceae_bacterium_NML_130396	0.0533	0.0634	0.1417	0	0	0.076	0	0.2969	0	0	3.2748	1.8426	0	0	0	0	0	0	0	0	1.1998	0.0817	0.6928	1.0741	0	0	0	0.1557	0	0	0.1595	0	0	0.2238	0	0	0.5587	0	2.0145	0.3394	0.3113	0	0.9461	0	0.0797	0	0	0	0
Clostridium_sp._KLE_1755	6.4993	4.782	12.291	5.6862	26.639	1.5364	29.5368	42.7543	18.8308	26.5376	12.0165	32.038	2.0536	1.6215	6.0243	9.2853	2.9494	9.5174	14.4685	21.139	24.8946	22.6383	12.6835	21.926	16.7148	12.2912	4.7922	84.6948	0	2.7082	30.1127	15.9478	15.0818	1.473	13.893	41.8969	18.1511	13.1579	15.9364	11.9829	16.6371	8.332	5.2238	11.8917	95.9811	17.4819	24.4171	31.553	11.9219
Cellvibrio_sp._BR	2.3429	2.8934	10.3041	0	0	0	0	0	0	0.1585	0.4825	0.4751	0.2426	0	0.3267	0.4701	0.4881	0.3844	0.4942	0.4623	0.3535	0.1896	0.3898	0	0.3766	0.1052	0.2857	0.2409	1.222	0.2201	0.4935	0	0.0418	0.0495	0.3137	0	0.096	0	0.089	0.2625	0.0535	0	22.931	0	0	0.2262	0	0	0.0626
Mucor_ambiguus	3.0049	2.8861	18.8457	6.2273	4.9691	3.3414	18.23	22.1366	6.3043	16.8797	4.9101	5.0054	6.2434	0.164	3.5198	2.1708	38.3734	19.9433	2.4847	36.1624	8.1477	2.4962	1.8665	9.4492	8.6782	5.1649	0.6841	6.0577	1.4629	6.412	20.9467	16.9625	1.9366	1.3837	2.4543	9.4386	2.4569	58.5405	8.7762	18.9776	1.5741	4.8722	23.764	2.8691	13.883	31.3068	4.5804	24.8263	3.62
TM7_phylum_sp._oral_taxon_346	4.8742	0.5421	0.8316	0.2997	1.2434	1.3157	3.2552	1.8815	1.2472	4.3871	7.5346	22.9376	0.776	0.8817	3.7349	3.3051	63.346	8.7908	0.5379	6.3258	30.2327	5.9876	9.3031	87.792	3.897	0.9881	85.3517	6.796	7.5738	2.843	21.5337	1.3712	2.7364	4.7602	7.2038	6.9004	20.5235	9.1074	5.1949	20.3099	1.0229	0.6654	12.5122	2.3466	9.4034	1.6776	11.089	1.3886	24.1656
Marinobacter_sp._ZYF650	1.2468	1.0485	6.2727	0.1464	1.628	0.4253	0	0.1504	0	0	0	0.3137	0	0	0	0	0	0	0	0	0	0	0	0	0	0	0	0	0	0	0.2425	0.2162	0.0821	0.0972	0	0.2339	0.1887	0	0.0875	0	0	0	0	0	0	0	0	0	0
Azospirillum_sp._CAG:260	17.7449	13.4283	79.1535	18.7816	20.2165	47.7373	94.9376	55.4649	33.1685	52.783	29.4349	22.0546	2.6239	1.9465	53.2791	21.2222	29.7558	72.1244	41.204	25.9971	11.4428	23.2457	24.9503	46.2887	28.2655	20.5685	15.7257	17.764	29.4849	9.0581	76.1903	9.8542	15.2731	7.6011	25.9427	194.25	155.526	57.4646	21.8474	14.9202	7.6025	67.0702	178.786	26.859	41.3848	29.7262	16.1961	109.576	25.2149
Bacillus_sp._FJAT-45086	8.5282	0	1.9325	0	2.5951	0	0	0	0	0	0	0	0	0	0	0	0	0	1.9089	0	0	0	0.0992	0	0	0	0	0	0	0	0	0	0	0	0	0	0	0.4534	0	0	0	1.4832	7.5774	0	0	0	0	0	0
Parabacteroides_sp._AF18-52	0.1018	0	5.1407	0.0547	0.8849	2.8671	0.6916	0	2.6022	6.1598	0	0	0.2806	0	2.5533	0.0622	0	0	2.2869	0	0	0	0	0.0641	0	0.4545	0	0.223	0	0	0.0381	0	0	0.0458	0	0.4039	0	1.3887	0	0.081	0	0.8198	0.6774	18.3369	0	0.5583	0	0.2164	0.0579
Fusarium_longipes	0.1616	0.3752	0.4096	0.6359	3.6669	2.629	3.1012	0.286	0.7386	1.332	0	0	0	0	0	0	0	0	0	0	0	0	0	0	0	0	0	0	0	0	0.6915	0.9248	0.117	0.1848	0.7814	0.5559	0.2691	0.3363	0.4159	1.1034	0.1	0.2402	0.9114	0.5001	1.3817	2.1129	0.5197	0.6552	0.5843
Ruminococcus_sp._JE7A12	23.1945	191.017	4.3653	14.1085	1.6015	0	11.3014	12.6124	0.0747	26.7506	1.2211	4.2707	17.1912	16.3631	0.1851	5.5745	151.541	8.687	12.7441	42.5562	1.4795	10.7409	4.8647	1.5431	3.7089	4.2148	14.659	32.3631	54.1884	175.685	10.1042	36.8086	13.009	15.2823	1.8091	11.906	35.8393	110.569	795.923	5.1384	15.3648	12.1266	131.59	212.814	8.3878	0.217	3.2895	5.3686	6.2505
Lachnoclostridium_sp._SNUG30099	0.0516	0	0	0	0	0.0735	0	0	0	0	0	0	0	0	0	0	0	0	0	0.1926	0	0	0.3045	0	0	0	0	0	0.2546	0	0	0	0	0	0	0	0	0	0.0557	0	0	0	0	0.0478	0.077	0	0	0	0
Sphingobacterium_sp._PM2-P1-29	0.1217	0	5.5126	0	0	0.0643	0	0	0.2881	1.2992	4.0882	46.1755	0	0	0	11.6369	0	0	0	0	0.1933	0	0	1.0218	0	0	0	0	0	0	0	0	0	0	18.5772	1.2362	0	3.6414	0	0	0.0249	79.9279	36.1371	0.1965	0.8086	0.2473	0	0	0
Rickettsiella_grylli	0.0605	0.1078	0	0	0	0	0	0	0	0	0	0	0	0	0	0	0	9.6714	0	0	0.6477	0	0	1.3698	0	0	0.977	0	0	0	0	0	0.0612	0	0	0.5233	0	1.0554	0	0	0	0	0	0	0	0	0	0	0
Dehalobacter_sp._FTH1	0.0099	0	0.8905	0	0	0	8.6079	7.1694	0	0.0379	0	0	0	0	0	0	0.0778	0	0	0	0	0	0	0	0	0	0	0	0	0	1.931	0	0	0	0	0	0	0	0	0	0	0	0.1166	0	0	0.054	0	0	0
Singulisphaera_sp._GP187	0.1479	0.2009	0.1123	0	0	0.1205	0.164	0.3136	0	0	0	0	0	0	0	0	0	0	0	0	0	0	0	0	0	0	0	0	0	0	0.5686	0.5633	0.1497	0.3799	0.3213	0.9142	0.9343	1.936	0.9119	1.0754	0.3836	0.0878	0.9993	0.1567	0.505	0.5791	0.1709	0.2694	0.1922
Bordetella_avium	0.3703	0	0	0	0	0	0	0	0	0	0	0	0	0	0	0	0	0	0	0	0	0	0	0	0	0	0	0	0	0	0	0	0	0	0	0	0	0	0	0	0.2363	0	0	0	0	0	0	0	0
Ruminococcus_sp._AM41-2AC	3.9477	0.9391	1.9075	4.1686	2.6914	15.3609	4.2651	4.5752	3.8243	3.0197	1.0306	0.5279	0.6435	0.0445	2.3748	1.708	0.3524	5.7721	39.4673	1.335	3.9974	11.5905	3.6595	6.1616	2.3369	23.4604	1.1073	0.0522	50.2881	2.1291	1.6969	6.0513	3.4098	1.1246	2.1768	1.0568	4.0566	12.964	7.7202	4.2276	1.6283	3.232	5.7056	2.7449	13.548	2.1064	2.8433	132.477	9.0362
Clostridium_sp._AM58-1XD	11.369	0.6549	0.2243	0.3467	0.5768	0.3209	4.3828	1.7266	2.0637	0.3242	11.2753	2.8966	0.148	0.2748	0.1415	0.6695	0.0832	0.0874	1.3313	4.9358	1.2822	0.9691	0.0332	1.2602	0.5618	0.9703	1.092	0.0473	1.1755	0.8757	0.9739	0.7087	1.7949	0.3813	2.0093	1.9804	0.9956	1.5657	0.8222	0	0.1776	0.4823	3.2186	2.9415	4.8168	1.0109	0.9925	8.8558	1.9172
Tuber_magnatum	0.1129	0	0.1902	0.7097	0.6373	0.941	1.6012	0.2859	0	0.7503	0	0	0	0	0	0	0	0	0	0	0	0	0	0	0	0	0	0	0	0	0.5351	0	0	0.1716	0	0	0.0833	0.1562	0	0	0	0.0743	1.0579	0	0.2138	0	0	1.2168	0.0543
Bacteroides_sp._AF20-13LB	22.4883	0.0373	139.286	0.5432	57.5219	48.162	88.3286	11.3316	5.5013	13.595	5.0021	3.5438	1.0776	0.0479	16.808	16.3672	0	0.0896	8.6831	57.5753	0.4334	0	0	0	0.1976	23.7173	0.2915	3.2259	0.285	0.6032	17.1978	0.1349	0	0	0.055	1.4518	0	17.6654	0.0469	1.6518	0	53.2846	3.9756	15.4649	2.4853	65.6633	0.5493	6.5637	6.1162
Desulfobacteraceae_bacterium_CG2_30_51_40	0.0746	0	0.793	0	0	0	0	0.2769	0	0	0	0	0	0	0	0	0	0	0	0	0	0	0	0	0	0	0	0	0	0	0.2231	0	0.0755	0.0894	0	0.2153	0.1737	0	0.5636	0	0	0	0.2206	0.2075	0.1115	0	0.2012	0.3171	0
Clostridium_leptum_CAG:27	1.4352	0	0.7606	0.0571	0	0	2.2715	1.7338	0	0.5739	3.9245	0.7063	0.147	0.6748	0	0.8202	0.1483	0.3504	0.1216	0.8535	0.047	0.2009	0	23.2531	0	2.2667	0.0509	0	0.7417	0	0.1462	0	1.8837	0	2.883	3.7474	0.0509	23.3272	0.4248	0.1555	0.1427	0.2287	1.3491	1.4593	5.3241	0.9606	6.362	3.5169	5.6157
Bacteroides_sp._CAG:189	0.5624	0	2.6883	3.5529	5.1257	4.9333	1.0847	0	4.1583	4.4939	0.3982	0	2.0163	0	12.653	2.2432	0	0	1.6728	18.4236	0.5835	0	0	2.0569	0.1554	1.8203	0	2.6895	0	0.0351	2.1064	1.6341	0	0.0711	9.2797	0.8798	0	1.6582	0.6305	0	0.2775	0.9096	0.9065	19.4419	0.9256	38.525	0	6.1876	0.2625
Dielma_fastidiosa	44.4471	14.5674	2.0299	8.075	2.6627	2.7971	2.2631	3.1422	1.3301	0.8541	1.2405	28.2162	0	0	0.1208	3.1327	0	2.5522	0.7656	0	0.3519	5.8803	1.1593	0	3.0332	1.8173	4.3295	2.143	0	2.4945	0.2811	0.6234	0.0394	9.9412	0.7539	2.9317	1.1173	0	1.6441	4.1269	0.3491	1.6889	4.0842	0	4.779	0	9.9817	3.1363	0.8272
Pseudoflavonifractor_sp._Marseille-P3106	24.6022	71.5336	1.0435	2.5812	3.1544	2.2218	4.3209	2.0994	10.0939	1.2671	6.6834	4.8896	0.0814	1.1636	7.7193	1.0914	0	1.9006	1.6418	2.7808	2.9212	5.0295	3.3032	5.2666	3.3392	8.7147	4.4721	0.2603	1.4511	4.3802	15.7116	0.4459	4.045	1.3885	8.6847	1.2637	7.6331	16.5285	3.0384	1.7341	0.2602	1.7714	6.6009	3.4294	11.8448	4.0506	5.9726	28.0793	25.9823
Pseudoflavonifractor_sp._An176	15.2868	0	0	0.166	0	0	2.1679	0.6387	0.6789	0.2025	2.6559	0.3846	0.155	0.2144	0	0.2768	0	0.5096	0.5053	0.1323	0.113	1.6487	0.2491	0.4333	1.0094	2.3075	0	0	0	0.4689	0.4237	0	0	0	0.5998	2.2965	0	0.473	0.2531	0	0.3042	0.4359	0	1.5298	4.2237	0	0.6382	2.7806	2.4467
Tuber_melanosporum	0.042	0	0.2232	0	0.4866	0.1197	0	0	0	0.3226	0	0	0	0	0	0	0	0	0	0	0	0	0	0	0	0	0	0	0	0	0.3768	0	0	0	0	0	0.0978	0.1833	0.0906	0	0	0.0872	0.9933	0	0.251	0.2303	0.1133	0.714	0.0637
Clostridium_sp._AM54-14XD	0.1623	0	0.0908	0.0551	0.4619	0.2923	4.7743	3.17	0.2183	0.4265	8.942	0.1771	0.0502	0.0142	0.947	0.1947	0.0674	0.2919	2.0465	0	0	0.1308	2.966	0.086	0.3314	0	0.0394	0.3492	0.0843	0.3494	0.281	0	0.0346	0.5735	0	0	0	0.1118	0.0184	0	0	0.213	11.4159	5.7018	0.1021	0.0937	0	1.525	6.9301
Acidipropionibacterium_acidipropionici	0.1576	0	0	0	0	0	0	0.2924	0	0	1.3825	0.5445	0	0	0	0.1283	0	0	0	0	0.6753	0.2414	0	0	0	0	0	0.1151	0	0	1.1784	0.1051	0	0	0	0	1.1006	0.3439	0.7654	0.5014	0.2555	0	0.9319	0	0	0	0	0	0
Faecalicoccus_pleomorphus	0.2563	0.9667	11.6718	0.9556	3.5264	3.8429	5.6022	5.9887	1.4351	11.9762	6.4962	0.4599	2.458	0.2865	5.2043	7.8178	0.738	3.101	5.2019	2.6155	3.6896	0.0382	0.3537	0.1257	5.4675	28.4703	0.0778	1.5306	0	1.8642	2.314	0.5324	0.0505	0.4488	27.8715	1.0586	0	0.7625	1.0235	0.7189	2.9362	2.1819	9.2978	0.6016	4.0825	2.6553	2.1882	4.0815	3.2751
Odoribacter_unclassified	0.1981	0.2826	0	0	0	0	0	0.5882	0	0.1522	0	0.0913	4.4264	2.6979	0	0.258	1.2502	1.4769	1.6137	2.0723	0	1.2744	0.6551	0.1995	0.9042	0.9096	1.2806	0.2314	0	1.6207	0	0.1057	2.5672	1.7101	0.3013	0.1143	0.6457	0	0	0.1261	2.3127	0	0	0.8081	0.1184	1.0863	0.9618	1.0105	0.3004
Lactobacillus_iners	0.0494	0.0587	0	0	0	0	0.3834	0.3666	0	0	0	0.5688	0	0	0	0.1608	0.5844	0	0	0	0.1058	0.1513	0.1167	0.2487	0	0	1.7102	0	0	0	0.2954	0	0	0	0	0.285	0.4599	0	0.1066	1.4143	0	0	0	0.1831	0	0	0	0	0.0749
Candidatus_Saccharibacteria_bacterium_TM7_ANC_38.39_G1_1	3.0514	0.3596	0.8194	0	0.9522	0	0.9794	1.6251	0.9797	1.855	3.2717	11.9743	0.3883	0.6202	3.2831	0.4121	55.8201	1.1675	0	3.2119	22.2841	2.7927	4.269	50.0606	1.4568	2.5496	42.2268	2.8695	2.5071	1.8321	14.6683	1.4202	0.4058	1.495	3.0269	1.7077	5.4466	6.7757	1.1615	8.075	0.0924	0.1161	4.7389	2.3076	2.4417	1.2059	7.8238	0.432	15.1601
Candidatus_Saccharimonas_sp.	5.4322	0.7269	0.0807	0	0.467	3.2075	2.1527	2.2627	0	2.0017	8.5908	29.7452	0.0362	2.6869	3.158	2.3025	73.8828	3.1156	0.556	3.9247	32.1188	3.8623	7.2185	62.729	2.9394	2.6257	83.8267	2.5118	11.1964	5.3791	22.2628	2.1277	2.2989	2.8149	3.7488	7.9411	14.2238	10.1781	4.2195	34.3581	0	1.0329	20.3604	6.1146	5.8511	0.6688	9.5538	2.8763	19.4059
Pseudomonas_synxantha	0.0246	0	0	0	0	0	0	0	0	0	0	0	0	0	0	0	0	0	0	0	0	0	0	0	0	0	0	0	0	0	0	0	0	0	0	0	0	0	0	0	0	0	0.582	0	0	0	0	0	0
Flavonifractor_plautii	916.777	3394.63	1753.61	2281.08	2081.44	861.066	1448.06	1017.9	1749.56	1197.89	1565.55	393.665	146.945	50.9797	5007.23	268.336	375.709	668.715	446.475	1454.53	496.574	266.599	254.353	3414.32	318.344	803.626	290.959	657.677	125.838	204.353	1180.92	410.653	26.6492	108.029	6921.08	308.085	286.623	1256.42	334.519	339.277	125.244	1127.4	1189.7	713.66	801.343	1069.42	574.535	1874.88	3359.78
Mycobacterium_tuberculosis	6.7662	84.3905	95.7226	9.883	6.4916	6.0798	85.8892	124.907	36.1297	55.0919	138.718	34.0276	12.4237	0.7453	5.2055	3.2447	150.538	66.2075	44.9875	54.6353	170.755	31.2633	12.4017	179.904	22.6892	23.4761	3.8092	17.5805	7.9809	13.9248	25.1487	70.0739	21.4833	8.6665	8.5124	191.617	4.7699	66.5376	15.2994	51.1643	7.3931	7.6721	223.234	19.352	34.8638	113.804	8.9118	67.2781	9.8729
Oscillibacter_unclassified	92.4748	13.9603	26.424	15.9627	6.2957	4.7642	19.0053	6.4084	12.1894	8.7228	6.2277	5.6255	1.2884	0.1459	7.1723	2.1032	0.407	10.2402	8.8584	18.4476	37.7052	0.1045	31.6578	20.9044	23.9383	2.6221	1.1042	73.8396	3.4854	1.9248	12.7766	7.6419	0.3057	50.6553	32.2602	4.7897	0.6249	11.7453	2.1611	3.0171	0.4945	9.6863	54.7414	1.0147	12.4501	14.0463	9.9095	52.1614	4.7639
Absiella_sp._AM54-8XD	18.1088	4.0962	91.6407	1.1332	9.0811	3.5833	9.8408	12.8233	12.7202	18.7372	7.1331	3.0612	1.4897	0.6059	4.5848	6.6811	2.9547	11.4427	15.9441	4.8001	7.6299	3.5594	9.0092	4.3532	12.5657	12.7182	6.0486	3.6265	4.4028	8.9289	7.9713	16.6245	0.3694	1.6524	5.3992	11.8467	0.5662	19.5846	9.625	45.8524	4.1013	5.3903	69.7257	8.5687	21.3055	7.5292	3.4988	19.847	13.2782
Lactobacillus_sanfranciscensis	1.8419	1.1174	0	0.0397	1.3661	0.1643	2.4745	1.4998	0	3.9181	15.9869	18.8146	26.5002	32.6668	0.8972	8.8211	18.559	8.6557	2.4366	5.7162	1.5339	13.2165	8.0415	59.2034	7.6166	4.2281	17.6112	2.7562	3.5575	17.9427	0.5365	73.28	20.4158	18.4774	3.3315	1.6358	13.1603	0.4027	0.0801	4.4673	24.5958	0	0.5591	3.8248	5.2689	0	106.989	2.0543	6.0766
Bacteroides_sp._AM37-9	52.7433	0	59.6316	233.968	31.1288	126.115	49.9812	7.4825	50.9251	72.2946	6.5261	0.7397	76.5435	0.6183	302.716	16.337	0.4472	0.6384	74.3549	383.64	3.9154	0.27	2.2391	5.231	5.0558	17.4668	0.2262	31.1766	0.7881	0.8657	18.7553	14.9063	0.075	5.8494	38.4861	14.9776	0.0866	49.4373	8.718	0.6428	3.2443	44.0464	12.5554	120.275	5.4992	474.984	1.2386	140.393	3.2912
Bacteroides_sp._AF34-31BH	199.13	0.0303	535.116	98.8753	6.6585	83.2889	15.1227	2.5515	16.2937	164.668	4.6682	0.1292	21.6294	0	67.481	25.6856	1.4565	0.6047	32.0167	87.1813	0.1878	0.1343	0.1807	7.7262	0	3.3411	1.7083	29.7533	0	0.2446	40.0037	17.8599	0.2095	0.1515	35.33	2.3853	0.1756	69.3689	2.9417	0.1623	0.0331	11.2982	4.7558	9.7595	6.4174	106.73	0	29.5108	2.557
Bacteroides_sp._AM54-2NS	18.3237	0	46.5147	78.4525	123.977	249.912	16.583	3.397	33.9181	21.7832	3.9114	0.8633	50.6711	0.2794	161.167	6.2517	0.486	0.3856	33.262	381.811	2.5332	0.1377	0.5634	16.6909	3.2273	53.7456	0.796	15.1082	0.064	0.9416	12.342	3.7213	0	1.8944	14.5925	8.0322	0.0825	19.0676	1.9733	1.7357	2.0201	45.9581	32.4652	79.7203	7.6619	206.428	0.6624	81.465	4.4201
Fischerella_muscicola	0.7902	0.411	2.0997	0	0	0	0	0	0	0	0	0	0	0	0	0	0	0	0	0	0	0	0	0	0	0	0	0	0	0	0	0	0.15	0	0.1252	0.1425	0	0	0.3198	1.1	0	0.2052	1.1682	0.3663	0.5903	0.5416	0.5328	1.2596	0.0749
Flavonifractor_sp._An135	28.2827	9.4196	114.442	10.3283	24.9942	86.8718	60.8435	90.1861	54.3231	67.49	108.432	4.0222	2.4074	68.311	43.5569	11.5079	76.081	45.8736	7.1032	28.0025	15.4231	5.1599	17.0337	15.1022	192.927	11.9743	2.7359	22.345	10.4922	1.6265	28.4416	2.9172	2.5297	3.0654	40.4751	32.9282	3.9677	40.9993	24.9384	4.3298	0.7515	6.1017	58.0729	10.3979	51.254	128.743	10.6902	38.1952	27.9417
Crassaminicella_sp._SY095	0.5009	0.0993	0.8874	0.5386	0	0	0	0	0	0	0	0	0.4909	0.416	0	1.3591	0.3293	0	0	0.6238	0	0	0.1972	0.8407	0	7.6664	0	0.2438	0	0.1485	0	0	0.3381	0.6006	0	0	0	0.7287	0	0	0.758	0	0.4937	1.3932	0.499	0	0	0	0
Megasphaera_stantonii	1.82	0.1401	20.0366	0.4728	0.8952	0.1999	2.4798	2.4027	3.6336	0.9279	8.7494	1.4379	0.1011	0.8156	0.5704	0.1919	1.4466	0.3518	0.4471	1.6068	0.6635	0.1204	0.3031	7.5346	0.6753	1.1024	0.1694	2.5141	0.2881	0.1048	1.7272	1.1681	0.0504	0.4039	0.9711	20.8504	0.556	1.4402	0.2968	0.6986	0.0637	0.0408	11.5321	0.4844	0.3972	7.3957	0.3055	1.7536	0.7947
[Clostridium]_polysaccharolyticum	0.5872	34.741	24.3291	2.5134	1.1286	0.5555	13.9882	17.3505	12.4464	15.7132	4.557	0	0	4.0442	18.2543	3.3299	2.6892	20.2757	19.3716	31.6575	0.2087	1.4918	0.9203	11.77	10.0025	1.9876	7.1956	0	1.4426	20.6145	31.4628	38.4426	14.2	0.8174	11.3575	12.6462	0	5.1012	1.0512	7.7479	14.6556	11.1304	16.1276	2.8947	2.9106	6.4091	21.2798	3.3123	5.022
Coprobacillus_unclassified	33.5216	43.0967	130.709	21.2277	310.786	70.8929	366.908	569.991	148.594	102.465	195.102	69.449	49.0505	71.5971	74.3683	132.457	41.6314	203.69	131.106	54.9865	106.353	71.8009	283.636	77.0019	114.627	89.7873	102.907	57.278	136.246	83.7434	113.519	107.838	39.8425	79.0348	37.3796	70.9218	74.9288	111.034	41.578	110.116	50.1452	41.9752	363.947	250.754	91.7184	43.3332	154.298	144.516	74.7437
Clostridiales_bacterium_52_15	47.4448	1.4464	48.3945	6.5092	19.9236	11.5164	106.083	131.983	44.6347	97.5017	22.9907	14.9044	8.9651	6.1484	19.5401	25.588	31.0878	62.7651	16.6807	62.1292	11.3579	15.1238	54.06	17.6589	44.8792	27.7665	3.8374	19.5365	10.2763	19.0592	28.749	140.474	0.7694	8.4088	38.8869	12.9904	1.0369	62.9523	28.9266	22.5011	8.3803	4.6659	413.595	51.4914	85.7931	39.3461	11.4445	91.5756	17.2183
Aquiflexum_balticum	0.1002	0.3176	0	0.0718	0	0	0.6481	0.4957	0	1.5392	0.3906	0.6923	4.369	2.8286	0	0.0544	3.688	2.3859	0.8001	1.4971	0.0716	1.5345	0.4733	0.1681	1.9052	0.7666	2.2358	0.1951	0.8243	2.3163	0.0999	0.1781	6.8295	1.2011	0.254	0.0964	2.2546	0	0	0.425	3.422	0	0	0.6192	0.0998	0	0	0.2839	2.3295
Robinsoniella_sp._RHS	2.3974	0.5525	1.9737	0.6053	0.8703	2.2216	7.3394	6.7124	0.1799	3.9913	1.2134	0.3892	0.7666	0.5531	0.9802	1.5157	1.3904	3.6744	1.4941	2.4634	2.0948	0.8318	5.6146	4.7385	1.5571	2.202	1.0716	1.0258	1.7263	3.5908	4.4049	11.461	2.4807	1.5702	3.6601	9.2541	1.32	3.5282	17.4604	4.8707	0.7595	0.1724	3.5339	0.3394	8.6324	0	2.8705	8.6555	5.2686
Atlantibacter_hermannii	0.0658	0.1339	0	0	0	0	0.2497	0.1194	0	7.352	0.3925	0.0773	0	0.3275	0.3543	0.4018	22.7117	0.7666	0.7202	0	0.2157	0.1542	0.3419	0.3379	0	0.0856	0.0775	0.1879	3.3352	0.2624	0.0481	0.1716	0.5048	0.9483	0.2039	6.0795	0.1562	0.2929	0	0	0.146	0	0	0.1491	0.4408	0.92	0	0.1367	6.6834
Clostridium_sp._CAG:793	0.4775	0.2629	3.7742	4.1995	0.244	39.9944	0	0	2.8359	0.9246	0	0	1.4442	0	7.0296	0	0	0.4906	0.5011	0	0	0	0	0	0.5046	26.8455	0	0.5185	0.156	0	0.531	0	0	0	0	0.5123	0	2.85	0.1916	1.1298	0	0.7378	15.2235	0	0	0.4868	0	0.7547	0
Clostridium_sp._CAG:226	0.8992	0.0448	53.0387	0.4956	0	1.1511	36.7241	20.9928	1.3716	2.5449	5.8651	0.2425	0.0861	0.3599	0.5912	0.6021	0.7594	4.2699	2.7534	1.9481	1.7415	0.549	1.6241	1.122	1.1891	1.5687	0.0486	0	0	2.3166	6.1824	4.1757	0.1397	0.3277	1.8153	1.1291	0	19.1587	1.7155	0.12	0.6471	0.4616	21.0739	0.6258	6.4508	7.1279	1.1149	12.752	1.6239
Actinopolymorpha_singaporensis	0.157	0.0622	0	0	0	0	0	0	0	0	0.6121	1.2055	0	0	0	0	0	0	0	0	1.1213	0.6413	0	0.527	0.4777	0	0	0	0	0	0.1565	0	0	0	0	0	1.7057	0	1.2426	0.4996	0.1358	0	0	0	0	0	0	0	0
Pseudomonas_umsongensis	0.3167	0	0	0	0.0342	0	0.328	0	0	0.4868	0	0.1313	0	0	0	0	0.2364	0	0	0	0	0	0	0.1748	0.5785	0	0.2258	0	0	0.0751	0.1264	0.2253	0	0.0923	0.0376	0.1984	0.0542	0	0	0.0281	0.0751	0	0.4996	0	0.1465	0	0.189	0	0.0868
Dentipellis_sp._KUC8613	0.1336	0.1588	0.355	0.9335	3.2246	1.9045	4.4071	0	0	0	0	0	0	0	0	0	0	0	0	0	0	0	0	0	0	0	0	0	0	0	0	0	0	0	0	0	0	0	0	0	0	0	0	0	0	0	0	0	0
Geobacter_sulfurreducens	0.1541	0	0	0	0	0	2.6921	0.858	0	1.6281	0	0	0.2266	0	0	0.3764	1.0638	0	0	0	0	0	0	0	0	0	0	0	0	0	0	0	0	0	0	0	0	0	0	0	0	0	0	0	0	0	0	0	0
Cylindrobasidium_torrendii	0.0484	0.115	0.5141	0.416	2.2417	0.6896	1.1264	0	0	0	0	0	0	0	0	0	0	0	0	0	0	0	0	0	0	0	0	0	0	0	0	0	0	0	0	0	0	0	0	0	0	0	0	0	0	0	0	0	0
Aneurinibacillus_migulanus	5.1291	27.0021	221.395	33.3113	87.3241	105.955	337.206	397.377	141.778	153.58	359.327	169.493	40.4661	38.94	76.8085	46.6891	206.005	133.631	189.33	482.145	93.5175	57.2335	49.2011	101.187	378.124	118.275	102.216	126.246	91.9818	42.258	815.53	83.7395	14.8358	5.6471	79.333	368.741	64.574	506.165	124.037	92.9189	11.9477	61.7623	605.352	59.9707	118.231	439.072	166.003	258.511	37.9362
Clostridium_sp._CAG:352	1.4846	0.6617	35.3884	2.2548	4.0439	0.198	13.5593	17.4221	24.13	24.2404	69.231	8.0295	1.0249	2.3391	7.9335	13.4548	9.4465	47.0475	10.7986	3.9739	31.0527	2.0433	1.7211	11.8139	4.3714	8.7718	0.579	21.1655	3.9321	3.2137	3.4766	9.4723	0	0.4235	6.0766	70.8454	0.7331	13.1372	17.3597	1.0903	2.0245	3.2958	48.3648	27.599	21.4486	78.661	15.1737	18.8443	8.2917
Citrobacter_sp._A1	0.1664	0.0283	0	0	0	0	0.1845	0.0882	0	2.4654	0	0.6023	3.215	1.3819	0	0.1548	2.9066	0.5908	0.1139	0	0	0.3277	0.9546	0.2394	0.434	0.0606	0.0549	1.8051	0.5868	0.4651	0.2133	0.3804	0.0481	1.3966	0.5423	3.1551	0	0	0	0.0756	2.621	0	0	1.4987	0.2131	0	0	0	0.0361
[Clostridium]_spiroforme	7.0098	2.0881	38.208	9.5731	22.8219	10.1932	47.0944	84.3078	12.8744	109.985	13.077	5.0879	2.4761	4.8082	17.1842	64.9708	1.8796	20.4943	10.9805	13.5176	5.1897	7.2902	20.5089	31.2622	27.3691	19.4322	2.4711	20.0518	5.3066	20.7732	8.4453	88.0007	1.1263	1.7638	11.7706	35.6108	2.7402	22.0004	65.278	6.9971	1.2325	3.0993	19.9955	7.4179	22.9139	11.7985	9.0707	91.6786	15.3664
Pseudomonas_sp._FSL_R10-1339	0.1255	0	0	0	0	0	0	0	0	0	0	0	0	0	0	0	0.2448	0	0	0	0	0	0	0	0	0	0	0	0	0	0	0	0	0	0	0	0	0	0	0	0.0805	0.1289	0	0	0	0	0	0	0
Lachnoclostridium_phocaeense	4.3173	3.656	25.1197	6.587	9.3966	2.6051	33.3765	39.4818	6.7034	15.6007	15.111	3.7444	0.6742	1.5272	7.5587	9.6511	5.9173	12.0937	12.1389	11.9108	10.3932	1.281	3.7722	6.3229	12.1668	18.0563	1.1696	3.9402	3.0509	38.6183	12.7625	5.8105	2.6374	1.8139	15.3194	6.3361	0.2605	6.9337	3.9623	2.7164	11.1098	6.7206	15.1939	5.0809	12.008	5.1875	8.0843	9.5924	12.4723
Butyrivibrio_sp._NC2002	1.8847	0	0.5363	0.3794	0.3407	0	0.3424	0.3274	0	0	0	0	0	0	0	0	0	0	0	0.6591	0	0.0773	0	0	0.4026	0	0	0	0	0	0	0.2691	0	0	0.1279	0	0	0	0.4356	0	0	0	0.5216	0	0.3015	0	0	0	0.4013
Oribacterium_sp._P6A1	1.2588	0	0	0.1719	0.2315	0	0.1551	0	0.2553	0.1535	0	0	0	0	0	0	0	0	0.0957	0	0	0	0.0944	0	0.0456	0	0	0	0	0	0	0	0	0	0.1013	0	0	0	0	0	0	0	0.2363	0.0741	0	0	0.1078	0	0
Intestinimonas_timonensis	7.5852	0.6503	95.3195	5.5557	11.1634	1.841	48.7398	22.243	31.0825	40.905	27.1283	8.6533	2.2778	0	8.6239	4.4369	19.139	20.6494	17.9463	50.6057	16.8122	4.6054	2.8776	7.6386	13.2669	23.9744	0.8107	3.3103	1.9222	22.1649	12.0651	4.8142	0	1.5543	2.1796	4.4512	0	113.985	17.5718	9.6512	3.7523	16.8976	72.1117	27.6911	21.0783	95.6352	5.4805	155.4	45.1795
[Clostridium]_methylpentosum	42.0243	9.5818	31.292	3.751	13.4181	29.5476	66.2463	84.0854	11.1481	103.937	47.8319	37.6693	3.54	4.1518	12.3138	51.0921	8.5573	324.22	22.6009	18.433	64.3143	30.7408	8.2209	35.035	46.1949	58.5947	5.4639	5.1746	22.1458	6.1476	25.5071	41.8245	10.7735	2.9425	56.915	32.3342	7.6583	52.9601	8.7023	7.6428	8.0412	20.4278	87.324	30.7623	99.5312	66.3897	14.963	77.6477	29.2553
Ruminococcus_sp._AF19-29	11.7752	13.3537	11.987	8.0146	7.9126	10.487	17.1372	12.3308	0.804	21.8253	13.8835	4.2896	2.028	1.1572	85.9049	7.4577	39.1302	11.8891	25.1506	17.6971	20.8687	7.1938	25.7792	80.7474	11.6316	4.988	4.6802	19.6567	22.0916	17.3941	44.211	12.2008	21.565	3.7626	18.5885	14.9185	0.1064	112.58	85.9388	28.1943	18.0081	9.2877	54.8242	6.6223	10.9836	11.8254	90.7658	17.8976	18.8506
Dorea_sp._CAG:105	0.0164	0	0.0871	0	0	0.0467	3.3071	5.4727	0	0	0	24.4569	0	0.0272	0	0	0	0.1018	0	0.1224	0	0	0	0.165	10.1334	0	0.0378	0	0	0	0	0.0874	0.0332	0	0	0	0	3.9332	0.0354	0	0.0213	0	6.6857	0.1215	0	0	0	0.1393	0
Fournierella_massiliensis	0.3565	0	9.1879	2.0107	1.7045	0.4111	0.9946	2.7073	6.0054	1.3815	1.4675	5.0121	0.2899	0	0.9039	1.5049	0.2616	10.1108	3.3032	0.1239	0.0503	0.4921	2.3656	1.9237	1.6593	0.4095	1.0771	1.5853	5.4423	2.9623	8.7588	0.5148	0.095	1.3498	6.6146	3.1308	0.4665	7.5306	1.2901	2.8359	0.147	0.0404	348.589	3.7877	3.0375	1.199	4.4878	3.0425	0.2559
Pantoea_vagans	68.9278	10.6475	27.3571	4.7473	9.414	7.0393	9.3598	15.1774	21.6824	49.484	0	351.265	0	0	0	12.8168	210.581	0	0	0	23.3889	0	2.6567	0	7.851	0.1688	3.0548	0.1932	42.1347	0.2353	10.1202	283.127	2.2603	3.2707	7.3882	6.159	16.5028	10.761	7.2718	44.2047	11.4283	6.1614	20.6349	186.98	8.3919	18.8429	10.6677	14.3817	6.4651
Epulopiscium_sp._SCG-B10WGA-EpuloB	0.7582	0	0	0	0	0	2.9427	0	1.211	0	7.7593	1.3098	0	0	0.5003	0	0	5.2989	0.4541	0	0	0.5806	0	2.863	1.2976	0.9669	0.4376	0	0	1.6855	0.5669	0	0	0	0.9609	0	0.4413	4.9634	0	0	0	0.3938	4.4833	1.7572	31.1513	7.2752	0.5112	12.0856	0
[Clostridium]_lavalense	306.521	116.547	47.104	9.0086	11.1859	18.7582	62.3538	82.0126	32.0037	31.5832	74.8821	15.1694	13.405	3.3565	75.4577	23.8575	5.436	28.9445	37.0331	57.7702	25.8594	23.9466	36.4059	16.8683	68.9745	52.6415	9.3983	19.5394	47.3809	11.9562	40.5285	32.4998	1.3591	11.228	44.5544	30.8419	7.8709	23.2525	42.897	64.9878	8.7544	26.023	44.1173	56.7096	145.794	15.7292	11.414	482.617	50.0663
Bacteroides_sp._An19	23.3442	0	1.0649	0	5.0304	0	0	0	0	0.3848	0	0	0	0	0	0	0	0	0	1.4971	0	0	0	0	0	6.3886	0.6939	28.6729	0	0	3.2961	0	0	0.3603	0	0	0	5.247	0	6.3754	0.7797	0	0	0	1.7963	7.6909	3.5129	5.1105	1.8231
Ruminococcus_sp._AF45-4BH	22.8421	0.6492	10.3755	7.4445	10.7744	2.8896	4.4466	3.4221	0.6026	23.8381	14.6156	9.5539	9.7935	9.4065	4.1721	1.3892	9.0377	35.9932	11.3281	9.6744	13.2308	15.6708	6.675	32.3902	7.1235	23.9335	12.6809	1.7529	9.396	9.9804	1.9501	2.4028	23.6353	15.6421	1.4195	16.3652	5.5692	8.051	14.6063	4.3645	12.1524	0.8678	6.9411	7.8032	22.5584	4.0197	6.2355	7.0045	18.8625
Vibrio_campbellii	0.1503	0.1191	0.7986	6.7861	14.7042	10.9985	17.8876	2.0449	5.1208	0.962	0	0	0	0	0	0	0	0	0	0	0	0	0	0	0	0	0	0	0	0	0	0.1336	0.0507	0.0601	0	0	0.1166	0	0	0.1594	0.1949	0.1041	0	0	0	0	0	0	0
uncultured_Dialister_sp.	2.4132	0.0896	1.2023	0	1.4563	0	0	0	0	0	3.087	0.3474	0.1108	0.7514	0.199	0	0	0	0.1807	0	0.3231	0	1.0687	0	0.1721	0	0	1.1011	0	0.6706	1.8043	0.4022	0.1527	0	0	0.8703	0	0	0.1628	1.1997	0.2934	0	0.8918	0.1398	0	0	0.4068	0.9616	0.2287
Clostridium_sp._SN20	4.4479	2.6093	27.712	22.6637	8.891	6.0297	6.8958	8.607	17.9442	53.4128	11.2325	2.0654	1.5353	0.3556	0.8832	6.1998	3.2727	47.8996	4.0714	13.4618	3.6142	0.4318	10.6852	10.9136	21.3383	36.0799	0.3708	5.7174	0.7268	25.945	12.356	5.0525	0.1355	1.9736	52.9113	2.5106	0	7.3597	2.9685	0.4684	6.2699	4.0545	11.6129	1.088	3.876	33.3188	7.3465	14.8629	0.4326
Bacteroides_sp._AM16-24	0.3434	0	0.1399	2.3158	0.3768	1.1324	0.1302	0	0.0418	4.7162	0.7923	0	1.475	0	11.4928	0.2045	0.1038	0.0407	2.8756	1.8434	0.0343	0	0	1.1805	0	0.0503	0	1.5157	0.065	0.0872	0.22	0.0175	0	0.0588	0.2486	0	0	1.6206	0.1091	0	0.0485	1.7347	1.1032	0.2096	0.4032	107.637	0	10.3915	0.1055
Sharpea_azabuensis	9.4924	24.1803	47.143	0.9921	1.1734	1.3513	37.1969	26.3612	23.8215	54.4259	111.318	0.4493	6.6853	0.7952	6.1705	4.2215	34.1792	13.236	26.4613	65.2798	6.2719	3.33	14.1099	20.6483	14.3233	4.0758	1.4346	2.7245	1.3148	7.6929	43.7087	5.9183	0	0.1184	6.5511	3.9932	0	46.1014	5.94	6.2158	0.0579	4.3349	708.584	8.966	1.9391	7.7883	1.1972	30.0448	7.6523
Paenibacillus_uliginis	1.2096	0	0	0	0	0	0	0	0	0	0	0	0	0	0	0	0	0	0	0	0	0	0	0	0	0	0	0	0	0	0.2893	0	0	0	0	0	0	0	0	0	0	0	0	0	0	0	0	0	0
Zancudomyces_culisetae	0.3671	0.4507	1.0073	5.7379	19.8381	12.6272	15.9936	1.6235	7.0979	2.5407	0	0	0	0	0	0	0	0	0	0	0	0	0	0	0	0	0	0	0	0	0.2834	0.7582	0.048	0.1136	0.4805	0.4101	0.4413	0.6204	0.8182	0.3015	0.799	0	1.6813	0.3514	0.4248	0	0.639	0	0.503
Pseudomonas_protegens	0.5803	0.7671	1.8048	15.3135	34.7428	25.9316	28.9164	0.063	0	0	0	0	0	0	0	0	0	0	0	0	0	0	0	0.0855	0	0	0	0	0	0	0.0508	0	0	0	0	0	0	0	0	0.054	0	0	0	0	0	0	0	0	0
Clostridium_sp._CAG:167	0.9815	0	0.9639	3.0643	1.7013	1.4776	0.4358	0.0321	0.7725	1.4541	1.8604	0.1194	0.2031	0	0.0912	0.942	0.1921	0.0268	0.2334	0.0323	0.1043	0.0132	0.0816	0.5653	0.0394	0.2864	1.0368	1.0341	0	0.0154	0.1292	0.023	0	0.0311	0	0.1993	0	0.5382	0.0373	0	0.0336	2.8531	0.1021	0.4484	0.129	1.0892	0	0.4038	0.9299
Bacteroides_sp._AM16-13	11.2693	0	14.2227	107	18.1865	38.5545	14.8145	3.9274	21.1914	21.4436	1.4024	0.769	35.6201	0.1328	134.436	9.14	0.6	0.5816	26.5831	189.968	1.4153	0	1.9033	5.1182	1.9264	7.0611	0.1043	13.6098	0	0.4795	11.3861	8.891	0	2.2318	33.4216	3.2747	0.0647	8.6429	2.6101	0.2614	1.0697	11.9228	7.3806	106.079	1.7456	214.166	0.4758	79.0029	1.1733
Weissella_cibaria	2.8222	1.1457	0	0.7663	3.7029	1.1943	1.217	1.5628	0.4188	3.232	8.364	14.2738	2.325	1.1063	0.8849	76.0077	1.7355	13.4197	5.7026	0.3832	6.5731	1.5293	12.8677	2.0299	8.4196	2.496	12.5384	6.2255	20.6853	6.4927	6.5403	7.0595	0.8948	3.7919	1.4501	4.5082	1.7824	11.0872	0.0472	1.2751	9.9314	0.5286	0.782	0.5751	2.6118	0.3594	2.5038	9.0861	2.2469
Duganella_sp._Leaf126	1.255	1.5797	4.904	0.5953	1.6395	0.9472	1.4326	0.137	0.2358	0.2127	0	0.0425	0	0	0	0	0	0	0.1326	0	0	0	0	0	0	0	0	0	0	0	0.0552	0.1476	0.0187	0.0443	0.2339	0.213	0.0859	0.4027	0.0398	0	0	0	0	0	0	0	0	0.0785	0
Desulfotomaculum_sp._OF05-3	1773.97	125.337	397.132	144.621	518.3	349.667	1632.05	1768.64	829.661	358.223	861.62	199.366	32.3405	68.4985	634.678	811.692	74.6026	420.389	600.293	141.145	310.849	338.275	2639.62	214.38	1220.33	244.828	198.777	280.182	161.226	490.063	269.214	198.792	34.3809	463.285	307.99	291.819	16.2744	407.13	117.228	432.349	81.8822	122.037	493.601	1777.75	389.992	175.59	234.996	470.649	1179.75
Pneumocystis_murina	0.1482	0.1174	0	0	0.1908	0.2817	0.1917	0	0.6311	0.1897	0	0	0	0	0	0	0	0	0	0	0	0	0	0	0	0	0	0	0	0	0.7386	0.5268	0	0	0.2504	0	0.4599	0.4311	0.2132	0	0	0.1026	0.5841	0	0.4427	0.2708	0.2664	0.6298	0
Clostridium_sp._ATCC_BAA-442	272.717	442.606	610.357	512.471	376.2	309.036	594.571	450.324	364.784	992.554	366.954	472.505	33.42	17.3086	766.109	96.4557	92.58	233.284	496.237	330.75	142.5	34.6556	87.9841	457.559	134.103	156.595	173.104	218.425	105.936	360.987	422.555	125.513	9.1115	56.1697	1557.52	206.06	23.0711	1781.44	90.0049	378.382	253.162	193.919	525.516	336.671	416.791	265.863	133.606	657.203	523.411
Pseudonocardia_acaciae	0.5969	0.4139	1.8503	0	0	0	0	0	0	0	0	0	0	0	0	0	0	0	0	0	0	0	0	0	0	0	0	0	0	0	0.595	0.2653	0	0	0.5043	0	0	0.4341	0.4294	0.3165	0	0	0	0	0	0	0	0	0
Intestinimonas_massiliensis	12.105	10.4903	47.1441	20.4532	31.9427	6.1371	71.0365	112.14	18.9315	174.533	19.874	1.5911	2.4347	2.8568	27.2137	145.5	9.0656	22.1734	35.6978	75.9647	6.1398	12.5581	11.439	34.1446	40.5942	23.5876	1.5385	32.73	2.681	36.4272	22.2978	105.591	0.2561	1.7875	22.6562	42.4638	1.1311	48.1718	69.9627	26.4136	16.8508	7.7574	46.1441	3.7614	52.6708	52.4754	12.2348	97.9026	25.6256
Bacteroides_stercoris	3846.38	68.4409	21696.4	3354.42	2384.56	150322	1623.14	367.401	43624.5	31352.9	711.534	350.442	6099.83	20.1496	2510.97	574.5	240.985	324.652	32702.2	24618	31.9231	157.858	263.61	487.722	150.364	3496.95	158.778	3970.38	71.2818	229.446	8753	95.5656	8.1464	65.3155	1378.73	2696.32	6.3239	9995.72	219.053	209.133	2008.05	49211.9	1568.76	464.707	908.929	12092.8	1194.14	2267.41	8642.3
Bacteroides_caecimuri	2.3325	0	3.1996	14.4342	4.2559	45.0046	2.7685	0.6694	11.9584	15.7534	0	0.101	5.3517	0	21.1134	1.9867	0	0.1217	18.793	37.9324	0	0	0.196	1.1836	0.5704	2.2783	0	1.9143	0	0.3981	2.5732	1.3032	0	0.2223	5.681	0.8084	0	7.0009	0	0	0.363	1.108	0.1595	14.2481	0.3844	17.5152	0.8045	15.2959	0.4712
Citrobacter_sp._wls718	0.016	0.0381	0	0	0	0	0	0	0	2.583	0	0	0	0.0532	0	0.0521	9.7884	0.0995	0	0	0.0343	0	0.0756	0	0	0	0	0	0	0	0	0.0427	0.0486	0.0192	0	0	0	0	0	0.3057	0.0415	0	0	0.0297	0.0957	0	0	0	0
Puccinia_graminis	0.2063	0.415	1.4335	5.2883	10.7856	7.7817	9.5456	1.001	4.2577	2.194	0	0	0	0	0	0	0	0	0.076	0	0	0	0	0	0	0	0	0	0	0	0.0949	0.1692	0.0321	0	0.0402	0.1831	0.1108	0	0.0342	0.0505	0	0.1648	0	0	0.0474	0.087	0	0.2023	0.1203
Bacteroides_sp._AF25-17LB	0.2287	0	3.646	9.8349	0.8833	18.2583	21.5986	4.5262	7.7926	40.6981	0	0.3512	6.1629	0	19.115	0.6205	0	2.8414	31.7766	98.8169	0.6533	0	0	13.817	0	1.3611	0	22.9294	0	0	18.4673	0	0	0	13.9124	4.1787	0	45.9111	0.4936	0	0.0989	15.6793	0.4508	0	0.4556	170.956	0	33.6995	1.8495
Desulfitobacterium_hafniense	27.577	0	0	0	0.9024	0.946	2.3477	1.3236	0.6311	0	0.3774	0	0.0632	0.0715	0	0.1751	0	0	0	0	0	0	0	0	0	0.7841	0	0	1.3316	0	0	0	0	0	0.5611	0.3283	0	0	0.5841	0	0.2394	0.3576	0	0	4.6372	0	0.8459	2.1827	1.3891
Lachnospiraceae_bacterium_7_1_58FAA	147.433	89.9913	223.832	103.853	226.915	310.92	308.442	347.75	207.532	287.879	204.514	33.8658	30.529	13.4798	486.167	151.595	185.154	162.25	74.6859	225.959	84.6733	19.5086	78.4922	328.327	173.131	212.123	34.8661	112.965	59.2284	120.827	247.151	70.984	46.252	19.8354	487.939	82.5663	19.8681	404.267	145.508	65.7024	15.544	112.343	222.895	65.7872	264.263	151.793	61.8099	285.084	365.921
Blautia_sp._CAG:237	3.1001	0.3665	1.7105	1.6749	0.6503	1.1686	0.346	0.9684	1.4724	3.6877	0.8284	0.7006	0.1133	0.1713	13.0198	0.7432	25.2101	1.6121	1.246	2.398	3.3496	0.67	1.7003	12.151	4.5925	1.5211	0.416	1.1401	1.4604	2.975	1.5333	2.19	2.0654	0.5439	2.0858	1.0345	0	3.0571	0.5822	1.543	0.5998	0.151	4.1611	0.4055	5.2035	0	6.3157	0.3276	2.5644
Candidatus_Stoquefichus_sp._KLE1796	5.2155	5.8778	1.6347	0.9827	8.0785	14.7086	11.4946	8.1534	2.7513	0.2363	6.116	4.3919	0.0904	1.224	8.815	7.4538	0	2.2625	1.8304	0	3.1257	5.2217	5.5217	31.1064	0	7.1709	4.2403	7.391	11.2796	13.0041	14.5617	5.9617	0.8982	79.6222	6.0371	4.4576	2.6593	4.2153	0.4932	18.2023	1.2081	2.1907	4.1575	16.1972	3.7553	2.3613	5.0222	0.7845	33.1071
Roseburia_intestinalis_CAG:13	594.14	3903.26	81.0239	52.1344	2.3485	0.177	412.978	307.526	137.447	1797.16	4003.21	3.1601	87.7741	120.226	16.7874	2922.44	68.7512	239.858	2095.42	22.4615	3720.59	6473.87	18.0794	3339.59	1328.39	162.522	8.1278	96.5599	905.38	958.605	2554.34	400.836	0.3438	8.1638	3.6439	3006.86	0.7783	17.9428	483.25	1653.62	0.7178	1749.31	499.573	4499.73	21.9918	452.487	25.2531	143.21	1.1615
Clostridiales_bacterium	680.553	341.331	1076.97	556.725	977.526	828.393	691.22	597.189	1298.8	731.796	569.414	189.757	71.1015	40.2385	399.88	181.917	125.186	234.888	212.815	490.372	281.771	149.914	272.785	356.176	323.792	373.426	170.005	379.849	146.052	138.727	585.364	291.663	27.2007	62.9985	794.703	377.215	70.3031	775.067	181.518	499.892	80.4091	736.949	1228.01	188.015	498.784	475.486	201.318	744.275	518.015
Cronobacter_sakazakii	39.6367	34.7997	31.7784	89.7946	193.151	143.365	261.969	56.1452	0	102.965	13.1385	92.8086	355.45	415.327	0.9957	50.2161	296.828	112.666	77.149	84.9199	12.3904	154.839	117.352	31.826	129.409	116.064	197.726	203.428	992.658	207.967	14.463	587.379	291.444	329.188	42.2521	201.754	651.706	2.5566	2.8731	140.43	360.798	0.7166	1.5839	74.3347	56.7799	0.5871	18.2982	16.6177	124.68
Lactobacillus_gasseri	0.237	6.5002	0	0	0	0	0	0	0	0	0	0	0	0	0	0	0.0374	0	0	0	0.0812	0	0	0.0477	0	0	0	0	0.0468	0	0.0283	0	0	0	0	0	0.0221	0	0	0.0302	0	0	0	0.2003	0	0	0.0511	0	0
Ruminococcus_sp._AM29-12LB	6.8498	3.2546	12.4899	4.4588	4.629	9.1215	29.8741	27.2574	6.0977	26.4247	3.7971	18.5002	1.6698	1.5111	66.6918	25.8947	16.4604	8.6855	2.9068	10.3943	10.4329	13.4931	14.1226	61.9782	18.7917	2.8827	2.607	11.0082	12.2815	11.9547	13.1078	21.9559	13.4506	8.8023	13.6384	14.1156	1.3678	48.784	61.4352	17.8673	10.2799	2.114	39.5793	8.5748	7.1029	1.8262	67.7917	20.9198	19.1492
Coprococcus_sp._TF11-13	7.4947	0.3861	6.9918	2.8101	2.18	7.3498	13.3348	18.5087	0	31.3573	3.5091	0.3161	2.0475	1.0051	3.8276	0.2318	11.0509	19.9733	41.8666	21.88	11.5754	0.8179	7.7853	17.5956	16.5607	2.5925	4.0032	4.5728	0.5176	3.796	45.7181	4.0196	1.938	2.0486	3.2486	8.1573	0	13.0216	34.9587	4.1037	4.6108	10.6646	7.5784	13.8069	3.1589	8.0964	32.4538	8.2579	0.6478
Bifidobacterium_vansinderenii	0.0063	0	1.7063	0	0	0	0	0	0	0	0	0	0	0	0	0	0	0	0	0	0	0	0	0	0	24.1827	0	0	0	0	0	0	0.0064	0	0	0	0	0	0	0	0	0	0	0	0	0	0.1019	0	0
Akkermansia_sp._BIOML-A41	8.1187	0.0864	114.731	202.293	57.1206	875.746	12.1292	2.1576	33.4313	272.359	2.125	27.6202	18.9237	0	20.2378	4.4446	51.7371	0	129.1	14.3049	0.4671	0	0	8.5988	0	3.4293	1.7616	34.7154	0.1794	0.4524	20.1309	0.4845	0	0	3.4342	4.8226	0	26.167	0	24.1637	2.269	46.0524	32.6611	0.2021	0.9772	313.244	68.8989	86.4985	322.517
[Clostridium]_viride	4.3198	2.6328	19.0523	0.2531	4.837	1.0525	3.1327	1.4623	49.648	10.5854	37.5281	2.6223	1.4768	0.17	2.2733	8.1444	2.6402	10.703	13.3274	0.1912	1.6096	1.3464	0.2906	7.7689	4.0432	5.1729	0	1.0779	1.0183	0.8144	14.893	0	0.2491	0.59	7.6486	3.9909	0.4056	1.6284	2.9271	0.587	0.2924	2.2883	335.724	2.3392	11.7096	8.1757	6.5282	6.3339	4.3147
TM7_phylum_sp._oral_taxon_957	0.601	0	0	0	0.278	0.3139	0.061	0.3796	0	0	1.0529	3.9559	0	0.0529	0.6663	0	1.8611	0.798	0.1527	1.1349	4.3343	1.294	0.4477	3.999	1.3131	0.0401	8.9205	0.2043	2.9947	0.3562	1.4618	0.4571	0.0549	0.5171	0.7972	0.5528	1.3235	2.8554	0.4531	1.7701	0.0408	0.0654	0.6585	0.3247	1.8126	0	0.8973	0.4384	1.8453
Puccinia_striiformis	2.9896	0.1913	0.7332	3.5599	7.4731	6.4253	4.5648	0.8248	0	0.1897	0.2888	0.5882	0.0726	0	0	0	0.3896	0	0	0	0.1058	0	0	1.9074	0	0	0.1905	0	0	0.0878	0.4935	0	0.1	0.0989	0	0	0	0	0	0.3928	0.5765	0	14.8945	0.0916	0	0	0	0.0977	0.6494
Lachnospiraceae_bacterium_NLAE-zl-G231	24.7094	0	1.1181	0	2.3441	0.8827	0.6143	0.0223	0.9345	0.0231	1.1237	13.7069	0	0	0	0.2541	0	1.0444	0.4942	0	0.1415	0.423	5.0109	0	7.369	0.4803	0.0693	0.9644	1.0968	0.0748	0.4195	0.7846	0	0.7098	0.0568	0.0346	0	3.2846	0	1.1463	0	0.2914	4.6542	0.59	2.4607	0	0.6716	0.0766	0
Candidatus_Rickettsiella_isopodorum	0.0506	0.1204	0	0	0	0	0	0	0	0	0	0	0	0	0	0	0	4.4827	0	0	0.217	0	0	0.2549	0	0	0.8183	0	0	0	0	0	0	0	0	0	0	0	0	0	0	0	0	0	0	0	0	0	0
Leptographium_sp._'qinlingensis'	0.0322	0	0	1.3835	0.3728	0.6421	0.874	0	0	0.1236	0	0	0	0	0	0	0	0	0	0	0	0	0	0	0	0	0	0	0	0	0	0	0	0	0	0	0	0	0	0	0	0	0	0	0	0	0	0	0
bacterium	0.6505	1.7858	3.9072	0	0.2625	0.0692	3.9909	1.7075	0.2384	2.3831	0	0.2397	0.1025	0	0	0.1362	0.3574	0	0	0	0	0	0	0	0.1432	0	0	0	0	0	0.0209	0	0	0	0	0	0	0	0	0	0.009	0	0	0	0	0	0	0	0
Prevotella_sp._CAG:279	35.6792	0.3156	77.595	115.762	79.7441	46.5291	53.6832	9.8718	80.9708	19.9704	0.4434	1.1451	6.4875	0.502	34.7642	13.3831	0	1.2204	12.8468	19.9809	2.2598	0.2938	1.6102	9.4959	0.173	9.2525	5.1108	59.1058	0.2985	0.6606	4.8822	2.5796	0.0664	5.5086	2.434	2.886	0.8158	4.8702	0.9559	1.2365	1.1763	74.1683	119.413	10.2292	6.1381	20.0996	1.4162	31.2495	28.4641
Fowlpox_virus	0.1719	0.2452	0.9135	0.2218	1.195	0.1961	0.4003	1.5309	5.9304	2.3768	0	0	0	0	0	0	0	0	0	0	0	0	0	0	0	0	0	0	0	0	0.7197	0.4584	0.1392	0.3297	0.5229	0.8927	0.3201	0.3001	0.1484	0	0.0892	0.1428	0.8132	0.1275	0.1027	0.377	0	0.2923	0.1043
Bacteroides_sp._An279	0.4819	0.0504	0	0	0.0971	0	0.1645	0.0786	0	0.0814	0.1239	0	0	0	1.0616	0.069	0	0	0.1204	0	0	0	0	0.5062	0.1721	0	0.4642	0.0734	0	0	1.6476	0	0	0	0.1074	1.8131	0.0493	0.5485	0	0	0.0275	0	0	0	0	0.2757	0.0678	0.3205	9.5424
Ruminococcus_sp._AM23-1LB	6.3683	8.3037	8.6114	3.4853	3.1716	11.1355	20.2335	21.8081	1.4721	34.788	10.701	5.7009	1.1192	0.1717	121.884	2.0875	49.4312	13.1128	4.3627	15.226	21.7884	12.3225	21.1947	95.6551	20.6573	5.4118	6.9199	14.1716	18.8179	12.401	26.0929	10.8891	23.2349	3.335	17.1378	11.4707	0.4026	63.5846	84.8539	38.4407	12.8315	1.3995	56.7683	7.2651	11.2883	2.4329	109.563	6.7672	34.5908
Hespellia_stercorisuis	54.3507	0.2233	0.9139	5.5147	3.1539	0.9113	6.1698	4.5404	1.6146	1.0456	11.4489	21.6481	0.1718	2.3166	0.1052	7.2647	0	5.9412	1.3819	0.8767	7.4176	4.0822	15.8373	0.0628	4.4123	8.7201	0.9665	3.5976	6.4167	2.07	6.7296	1.9776	1.7414	10.8136	5.0588	5.3203	0.0291	10.6526	1.4525	11.504	0.2919	1.5943	12.9648	22.0128	14.8811	0	2.5366	6.5553	9.0218
Betaproteobacteria_bacterium_HGW-Betaproteobacteria-1	0.1199	0	0	0	0	0.3418	2.7918	0.8898	0	2.993	0	0	0.3524	0.1991	0	0	0.2364	0	0	0	0	0	0	0	0	0	0	0	0	0	0	0	0	0	0	0	0	0	0	0	0	0	0	0	0	0	0	0	0
Lachnospiraceae_bacterium_AD3010	10.5465	0	0	0.0824	0	0	0	0	0	0	2.7766	2.2774	0.314	0.2061	0	0.1427	0	0.4762	0	0.3275	0.9391	0.5371	0	0	0.3061	1.3416	0	0	2.1639	0	0	0	3.8956	0	1.3333	2.7822	0	1.2544	0	0	0.2274	0.1821	0	0.3251	1.0306	0	0.3398	1.8632	0.3988
Ruminococcus_sp._AM45-2	0.8753	1.1715	1.4328	3.6234	1.4376	2.366	2.0611	3.413	0.1825	5.8366	3.6631	0.7853	0.2051	0.1423	24.0941	0.5201	9.6942	2.2167	1.4524	4.5625	4.6778	1.4831	5.6909	25.0987	1.1329	1.0962	1.3686	9.2646	4.3128	5.9808	4.6652	2.5077	6.7977	0.8723	4.5294	1.6421	0	16.8025	21.7766	6.1367	2.6872	1.0094	13.5506	1.0383	1.0714	0.0682	26.3889	0.8055	4.3175
Bacteroides_sp._AF04-22	0.0661	0	8.1969	21.9364	2.0307	9.9311	23.365	5.4989	0.5366	31.6282	0.5638	0.111	3.7304	0.08	12.4682	1.6013	0	2.4704	19.4127	77.9551	0.3997	0	0	13.8328	0	0.5057	0	18.3265	0	0	9.4567	0.1285	0	0	9.6521	4.1719	0	5.4694	1.1444	0	0.4376	14.2497	0.3908	0	0.3601	122.764	0.065	25.5425	0.2924
Bacteroides_reticulotermitis	1.2207	0	9.0458	23.1466	6.8796	3.6359	2.905	0.9464	8.965	6.6053	1.0498	1.0009	5.212	0	42.1186	6.4837	0.1456	0.1147	5.8059	26.2752	0.1582	0	0.0793	13.6281	0.1812	2.329	0.0426	6.5052	0	0	39.6622	1.0897	0.154	0.4807	23.4635	0.405	0	2.6531	0.4744	0	0.2568	6.0554	0.2183	8.0633	0.2924	32.195	0.1146	18.1775	0.7158
Pseudomonadales_unclassified	0.3423	0	4.1411	0	0	0	0	0	0	4.4836	0	0	0	0	0	152.242	122.536	0	0.1245	0.1941	0.1113	25.4702	0.5847	0	1.0599	0	0	0	0	0.4619	0	0	0	8.9978	0	0	0	0	9.9334	0	0	0.4317	0.9216	0	0.3105	0.8545	0	0	0.2363
TM7_phylum_sp._oral_taxon_348	1.0031	0	0	0	0.7227	0.0881	0.5148	0.3901	0	0	1.3839	2.7416	0	0	0.1349	0.0503	2.9333	1.2524	0.148	4.8253	1.9529	0.3902	1.9107	2.3844	0.2	0.5059	7.9477	0.1492	1.5251	0.0682	2.3918	0.1505	1.5588	6.3511	1.1638	1.7663	2.0768	4.7639	0.2545	1.3523	1.0883	0.1804	4.2907	0.9855	0.3756	0.6806	0.4166	1.9413	1.1362
Veillonella_montpellierensis	0.9218	1.2506	0.3388	0.26	1.3543	1.4543	0	0.8974	0	0.4898	0.3728	0.0501	0	3.653	0.9831	0.0708	4.149	0.4734	1.9541	0.6826	5.259	9.9326	0.9053	0.642	6.5719	4.6347	0	0	0.215	0.0567	0.286	3.5993	0.1871	0	3.6696	0.2759	0.1248	0	5.8519	1.2914	0.0554	0.4073	4.1796	0.7844	1.1431	0.3496	5.4167	0.3703	0.2311
Megasphaera_sp._NM10	0.1074	0	275.573	0	4.5201	0	0	0	0	0.0986	0	4.0946	0	0	0	0	0.1067	0	0	4.0844	0	0	0.0712	0.0759	0	0	0.0696	5.0384	8.4371	0	0.248	0.1092	0.0293	0.0174	2.1098	513.878	0.1012	0.1519	0.101	0	0.0155	0.1167	165.393	0.1067	0.3707	3.5897	0.0323	0.1018	9.6183
Treponema_porcinum	1.4396	1.6674	11.3772	2.9367	31.7912	0.3157	18.0513	35.0662	17.687	5.8127	11.0089	26.2709	0.3798	0.613	2.9229	7.4509	1.7469	3.2103	6.6321	4.4125	22.4593	21.8218	4.2721	22.3011	11.7924	14.1222	2.5563	67.4783	0.5467	0.5908	18.8777	1.8702	0	0.3098	6.8301	38.764	6.7883	2.8997	13.3847	11.1569	15.3205	4.9847	6.9846	9.0339	92.7594	10.5244	16.526	13.1796	1.5113
Odoribacter_sp._43_10	6.0295	0	33.6875	15.6558	11.4049	5.8945	13.5922	1.4756	0.7286	17.7554	3.5806	0.8502	5.5713	0	28.063	18.1101	0.2034	0.3542	27.1926	66.7544	1.5816	0	0	11.1505	0	3.0506	0	60.7942	0	0.6565	20.0192	1.4765	0.0305	0	37.4252	0.0868	0	67.383	2.4551	4.6977	0.4788	4.2178	3.7797	0	2.2059	88.8433	0.4978	11.8269	0.8396
Leuconostoc_citreum	16.8082	2.9156	1.3017	5.0421	0.1902	1.6384	4.8815	18.376	0.0517	0.3003	5.912	802.639	14.0723	2.2273	14.9704	232.394	16.2549	19.2587	2.4328	1.7903	2.6593	0.8069	51.9359	14.0344	12.2925	2.2278	8.045	1.0617	16.443	2.9558	3.396	166.541	0.1911	0.9144	6.0393	6.7609	0.4078	20.8428	0.7765	16.4264	22.7059	1.0221	5.4398	1.7634	5.5937	2.8414	52.4371	11.2471	1.0253
Schaalia_cardiffensis	0.4659	0	0	0	0	0.7994	0	0	0.4924	0	1.0253	2.748	0	0.2638	0.635	0.1427	0	0	0.5113	0.2879	5.7444	0.8733	0	3.4704	0.2	0	2.7481	0	2.3944	0	0.3281	0	0.5543	0.1051	0	0	1.3883	0	2.2544	1.946	0.4548	0	0	0.1429	0	0	0	1.046	2.4328
Streptococcus_sp._HMSC064D12	14.3791	6.5471	3.0886	0.7594	0.0648	1.5752	2.3244	1.571	2.9929	0.8016	58.4053	130.359	0.1884	1.4652	4.6263	1.3353	16.66	36.438	1.8499	33.0465	4.1571	30.4196	93.4659	97.3436	39.9742	3.8919	25.8335	3.4725	8.1324	0.4517	68.9374	348.287	1.3274	0.5164	0.3806	62.6254	3.4996	2.6767	32.5532	157.407	8.3704	1.0383	131.418	20.156	21.19	6.8494	199.59	66.9628	40.0252
Ruminococcaceae_bacterium_D5	4.6988	2.9425	5.6043	0.6802	1.496	0.4492	23.9926	27.6066	7.9021	19.4415	3.5523	0.2672	0.1471	0.0565	1.0412	1.276	0	3.7547	6.9384	2.3415	0.4392	0.3159	1.8535	0.3194	1.4535	0.7633	0.917	0.5852	0.4644	1.3491	0.6336	2.8603	0.0345	0	0.7281	0.5147	5.6642	5.0618	0.089	1.9788	0.0535	0.9016	12.8162	0.0765	4.7507	21.3517	0.7789	4.3958	0.4672
Fibrobacter_sp._UWH1	0.2023	0	0	0.3625	0	0	1.7013	1.3764	0	0.518	0	0	0	0	0	0.2744	0	0.2095	0.8885	0	0.1445	0	0.2389	0	0	0.43	0	0	0	0	0	0	0	0	0	0	0	0.2943	0	0	0	0	0	6.4392	0	0.3698	0	0	0
Dialister_micraerophilus	0.0265	0	0	0	0	0	0	0	0	0	0	0	0	0.044	0	0	0.1046	0	0	0	52.405	0	0	0	0.0605	0	0.0612	0.0774	0	0	0	0.0707	0	0.0318	0	0	0	0	0	0	0	0	0	0	0	0	0	0	0
Arthrobacter_sp._N199823	0.3757	0.8933	3.6605	0.1346	0.4837	0.5356	0.243	0.2324	1.2002	0.2405	0	0	0	0	0	0	0	0	0	0	0	0	0	0	0	0	0	0	0	0	0	0	0	0	0	0	0	0	0	0	0	0	0	0	0	0	0	0	0
Eubacterium_sp._AM28-29	5.6648	59.264	22.7593	13.6577	19.2876	9.3811	13.2743	14.0816	10.1552	8.0431	11.7162	29.5333	0.5845	59.5523	11.7713	3.8661	3.0451	15.8916	5.6004	34.9389	83.047	11.8139	90.8144	24.3359	67.2764	2.9371	26.1736	37.6527	12.2144	16.6797	87.9163	23.8141	33.0856	21.1642	18.6016	5.1428	26.0732	16.6745	2.8578	19.881	11.7669	2.0634	73.9218	18.3203	7.217	6.7352	17.6937	15.2355	28.7868
Firmicutes_bacterium_CAG:83	3.1275	0.2083	95.1662	4.4973	5.0429	0.5208	81.1708	31.6543	83.0033	53.8214	1.3679	2.8284	1.845	0.2353	1.5695	0.6167	5.2914	0.8607	6.5262	60.8339	0.2072	0	0	11.2968	0.8224	1.3077	0.4443	0.2383	0	0.4402	17.7625	0.1117	0.1188	0.0824	3.1733	0.9673	0.1103	7.1914	0.245	0	0.1396	3.3213	72.6648	0.3045	2.0772	14.4336	4.2249	22.6898	4.7238
Bacteroides_gallinarum	3.2749	0.0864	58.4289	3.6266	3.5634	128.852	4.6108	0.6952	47.7617	32.1118	2.427	0	7.9543	0	4.6375	4.152	0	0.3135	43.0115	24.8324	0	0.4474	0	1.0705	0.269	2.0286	0	9.5547	0	0.4372	9.4118	0	0.0155	0.119	38.3438	2.8679	0	17.7164	0.1569	0.1336	0.869	46.0235	0.9827	0.1711	1.6799	8.6603	0.6181	8.4041	7.864
Hyalangium_minutum	0.0842	0.1001	1.5669	1.5397	4.0671	2.1619	3.1062	0	0.2691	0	0	0	0	0	0	0	0	0	0	0	0	0	0	0	0	0	0	0	0	0	0	0	0	0	0	0	0	0	0	0	0	0	0	0	0	0	0	0	0
Bacteroides_sp._AM32-11AC	0.2864	0	7.2284	4.1517	4.5272	0.6594	28.7361	9.2409	0.7876	43.4176	0.2198	0	3.3938	0.2353	14.7989	1.2702	0.1206	2.1736	27.0829	93.0329	0.3047	0	0	19.7686	0	1.1128	0.1022	12.9024	0	0.2701	8.0942	0.1003	0	0.0465	8.5008	3.6319	0	32.4879	0.6388	0	0.1236	14.2775	1.0768	0.4507	0.3335	131.482	0	21.5775	0.0309
Holdemania_massiliensis	1.7419	2.5057	0.8375	0	0.479	0.1473	3.1581	0.6823	5.3874	3.7824	8.2609	0.5709	0	0	0.8146	2.3937	0.9125	3.2434	1.2225	18.4035	0.2909	0.638	0	1.0654	0	1.0861	1.6261	0.3407	0.2565	0	1.757	0.1113	0.0423	0	0.6788	1.1446	1.4664	13.3058	6.6578	1.1925	0.6999	0	6.385	0	3.7745	1.8079	0.1417	9.4083	1.1211
Clostridium_nexile_CAG:348	134.035	83.6985	10.7982	3.7156	4.0967	1.6513	3.6202	3.319	3.5969	3.1414	13.4587	5.0636	1.0481	6.889	6.4425	54.3043	2.7216	14.1217	6.4281	16.8807	2.2629	2.6395	37.1577	38.905	20.2035	23.92	17.8743	14.8646	42.7173	3.8494	2.1241	1.9512	13.3812	5.0115	712.021	8.8817	459.985	13.392	9.5989	155.441	13.149	67.3833	4.9289	35.6631	10.1626	1.7832	8.2747	20.8863	153.468
Ruminococcus_sp._AM54-14NS	13.3174	11.6251	10.9991	16.4868	5.8007	10.6521	23.875	23.0835	5.1516	43.4793	16.7503	16.0077	6.0848	2.2128	137.161	6.0381	51.5205	20.916	10.0742	27.6486	32.2942	21.3605	40.1657	169.642	31.4993	12.9312	7.9111	28.9507	23.5796	42.3682	56.6355	26.2308	29.9536	10.7029	26.6109	17.5778	9.8199	117.927	122.409	40.706	20.1376	3.9596	93.5596	15.3675	26.2368	6.6159	110.029	10.5319	45.3463
Eubacterium_sp._am_0171	0.0899	0	1.6483	0	0	0.1474	1.8058	3.0694	0	0.1986	0.3133	0	0.1013	0	0.0959	0.0561	0.1359	1.1775	2.3943	0.1287	0.0369	0.1377	0.2035	3.7683	0	0	0.2785	0	0	0.0306	2.7314	9.236	0	0	0.1747	0.0497	0	26.3961	1.6471	0.1645	0.2459	0.2148	4.1777	0.4153	0	0.189	1.1761	0.4395	0.3397
Streptococcus_iniae	0.4818	0	0	0	0	0.1527	0	0	0	0	0	4.4392	0	0	0.2826	0	3.3783	0.6652	0	0	0.5735	0	0.2529	2.965	0.6108	0.1366	0.1236	0	0	0	1.1208	2.1414	0	0	0	2.6258	0	0	1.04	0.8517	0.1389	0	4.1154	0	0	0	1.0107	0	0.7306
Butyricicoccus_sp._AM05-1	34.5922	40.2044	154.685	21.491	65.7235	56.259	178.667	160.62	35.6727	197.202	126.5	35.9993	21.18	14.0911	58.2178	85.4902	127.26	209.253	171.495	214.511	73.4507	82.2434	48.3203	155.064	102.98	71.878	22.1327	67.3821	37.4518	136.505	143.22	84.421	6.8486	51.2342	96.9669	73.1856	6.1037	369.204	54.8407	250.664	59.6567	33.4803	242.253	63.3324	106.912	45.5135	51.0787	148.613	97.5195
Clostridium_sp._CAG:138	0.5105	0.1783	0.8415	0.5242	0.7967	0.707	0.3639	1.2526	0.3594	0.5042	1.6449	0.2591	0.2756	0.1869	1.0394	1.2821	3.1966	2.0386	1.5024	0.4203	0.6428	0.4882	1.6831	0.2832	1.2837	0.6218	0.5724	3.7238	2.4069	0.8337	4.3558	1.4501	0.2278	0.562	0.5229	1.0279	0.4463	1.3276	0.2428	1.8495	0.7053	1.2856	2.8461	0.9387	3.9783	4.7754	1.2644	2.1521	1.4786
Aeromonas_phage_62AhydR11PP	0.0516	0	0	0	0	0	0	0	0	0	0	0	0	0	0	0	0	0	0	0	0	0	0	0	0	0	0	0	0	0	0	0	0	0	0	0	0	0	0	0	0	0	0	0	0	0	0.0464	0	0
Cronobacter_universalis	0.8767	0.579	0	0	0.3762	0	9.0734	1.8073	0	5.2377	0.5696	1.5705	6.7294	6.1471	0	0.4757	18.8242	1.8154	1.4001	1.8194	0.8348	3.4313	3.221	1.4713	3.7787	2.4845	4.4973	9.9559	40.8736	4.1575	0.2913	22.0785	3.55	51.1481	0.7407	11.2411	21.0881	0	0	4.3388	9.6019	0	0	1.2642	1.1642	0	0.5254	0.414	1.7725
Bacteroides_sp._HMSC068A09	1.5052	0	0.0784	11.901	0.0738	0.6249	0.2091	0	0	0.1052	0.2038	0.3081	20.5338	0	0	0.1738	0	0	0.0458	84.8018	0.0375	0	0.0413	0.6647	0.0337	1.5727	0.1242	42.0386	0	0	0.1143	0	0	0	0.0969	0	0	0.5278	0.0412	0	0	0.0397	0.1034	0	0	0.2575	0	89.4831	0
Rozella_allomycis	0.8436	0.8734	2.2143	3.5856	6.1595	4.7201	6.3641	1.3975	2.2516	1.4266	0	0	0	0	0	0	0	0	0.5385	0	0	0	0	0	0	0	0	0	0	0	0.8989	0.7186	0.2221	0.263	0.6349	1.0117	0.1166	0.8745	0.3132	1.0772	0.2599	0.2082	1.2973	0.4644	0.8981	1.0987	0.5404	1.2776	0.7519
Lachnospiraceae_bacterium_OF11-28	1071.78	101.417	567.555	178.752	447.183	312.229	1225.25	1235.43	602.026	577.575	624.062	283.546	30.3967	92.1938	329.485	552.386	211.767	322.972	547.591	259.003	257.427	362.625	1513.11	198.593	665.948	222.958	315.764	305.542	120.358	480.994	314.562	375.006	50.3583	415.271	155.121	182.427	15.4499	358.339	208.094	809.388	93.6404	131.951	368.042	1384.79	614.194	95.3099	70.5672	640.263	799.523
Pseudomonas_fluorescens	1.2066	0	0	0	0	0	0	0	0.2218	0.3258	0	0.1836	0	0	0	0	0.0967	0	0	0	0	0	0	0	0	0	0	0	0	0	0	0	0	0	0	0.3006	0	0	0	0	0.0474	0	0	0.1478	0.2341	0	0	0	0.1632
Firmicutes_bacterium_CAG:555	2.7373	0	0	0.1523	0	0	0.0794	0	0	0	0	0	0	0	0	0	0	0	0.098	0	0	0	0	0	0	0	0	0	0	0	0	0	0	0	0	0	0	4.3283	0	0	0	0	0.2418	0	0	0	0.1103	0	0
Clostridium_saudiense	3.9226	9.6917	0.2232	0.2709	0	0.0228	0.349	1.1642	0	3.8939	12.174	2.8575	4.9459	3.5083	0	8.3036	1.1583	2.7554	6.0629	0.2836	8.5678	15.4276	35.7115	4.8626	3.5726	1.8813	1.6829	0.8576	6.5576	3.8927	11.0759	3.2249	3.2986	2.1606	1.8627	7.1011	4.0054	0.2965	2.8656	5.5308	3.1099	5.9258	1.4622	12.922	7.644	1.1785	1.2389	0.034	1.5558
Robinsoniella_unclassified	1.3032	0.1263	0	0.2045	0	0	0.9954	1.7309	1.2378	0	2.5084	0	0.2343	0.2092	0.561	1.3547	0	0	0.1857	0.7523	0.4349	0.2592	0.251	2.0201	0.1212	3.4806	0.4686	0.1226	0.7398	0	0.1589	0.9918	1.1295	0.5096	3.6801	0.9766	4.2052	0.2319	0.2053	0.3381	0.2323	0.2617	1.0865	0.9867	4.4762	0	3.2558	3.9295	6.5473
Prevotella_salivae	149.975	0.6696	1074.67	965.068	924.68	1105.78	494.761	104.889	10987.9	641.732	231.207	424.646	178.657	2.3412	546.988	295.829	27.7533	18.9039	319.17	995.075	15.6494	10.4007	8.4288	554.87	7.4158	1199.62	178.986	464.377	42.3459	8.4105	919.011	20.6921	2.6444	19.5411	494.769	72.7226	2.637	1051.04	25.8697	56.5988	16.5585	1604.61	860.455	129.475	99.6902	1492.9	27.2156	1148.81	245.483
Clostridium_sp._AM34-11AC	1854.03	119.755	694.183	563.407	1196.62	655.278	1503.35	1448.95	4833.24	449.118	921.593	223.54	58.7939	67.394	413.7	791.423	94.1516	333.208	542.062	214.774	134.065	281.078	2052.3	319.13	968.929	419.07	195.049	345.608	237.787	551.79	280.444	162.853	33.0398	397.441	155.53	214.196	28.7052	667.765	137.071	469.085	65.7179	454.836	504.533	2684.64	471.086	242.263	166.811	932.774	1052.12
Absiella_unclassified	2.3414	2.0609	3.2907	1.2044	3.2342	1.7617	39.7566	28.0277	7.09	6.463	11.3715	1.2749	1.4905	0.428	5.6801	1.1497	1.9592	2.9924	6.9866	2.473	3.2517	1.1953	1.2089	1.6078	3.4397	8.2897	3.7551	8.0006	1.56	3.0905	3.6332	4.049	0.5087	0.8886	1.925	19.7963	1.0336	11.3593	1.617	6.9721	2.2415	3.3037	26.5186	4.5027	5.294	27.4724	1.6023	53.8303	4.3466
Marasmitruncus_massiliensis	23.2596	0.162	0.7659	0.4755	1.7341	0.8692	2.785	4.2797	2.4942	0.4067	4.3177	4.1951	0.7017	0.5791	0	1.6629	0	1.133	0.7298	2.1696	15.3341	1.236	8.6799	0.7767	7.0009	7.6121	0.7111	3.9359	2.1612	0.734	5.9023	1.2267	0	14.7594	5.7802	4.4481	0.6866	0.8657	0.4808	0.8558	0.566	0.6642	4.1588	3.5462	11.0632	0.9702	3.7231	5.239	7.7411
Bacteroides_clarus_CAG:160	8.9081	0.0531	42.5214	11.2748	10.67	484.84	5.2863	0	113.137	92.045	1.2292	0.3772	15.8449	0	12.1361	1.8011	0	0.2082	106.192	74.5867	0	0.9844	0.2333	3.6479	0.3268	10.5353	0.4527	15.5221	0	0.8539	21.8541	0.2953	0	0.0592	6.2521	7.451	0	24.9108	0.4081	0.2641	5.2201	157.885	6.5175	0.0972	3.5428	100.048	3.8591	6.1257	22.5079
Acidaminococcus_unclassified	0.2682	0	27.8786	1.45	0	0	0	0	41.2751	1.092	116.251	0.8307	0	0	0	0	0.0934	0	0.2066	1.6817	0.0735	0	0	0	0	0	0	0	0.078	0	2.8264	0	0.008	0	0.04	119.49	0	0	0	0	0	0	0	83.4046	0	0	3.7818	0	0.0536
Bacteroides_luti	0.7795	0	3.727	3.4003	0.985	15.0888	3.4644	0.7098	4.0734	22.2841	0.7457	0	2.3429	0	11.3132	0.3114	0	0.7922	20.4093	44.3006	0	0	0	5.778	0	0.9757	0.4727	11.916	0	0.1134	8.9246	0.17	0	0	4.525	1.8394	0	21.4252	0.4128	0	0.4962	10.1995	0.3027	0	0.153	62.2266	0	12.4665	0.6768
Butyricimonas_virosa	46.4308	2.1175	152.415	151.468	183.324	379.252	89.0052	20.6559	518.703	96.5105	27.3048	11.7052	34.8243	1.4915	157.476	34.1424	1.8775	9.9039	96.7582	270.005	2.7918	3.5083	4.6616	81.1012	3.292	106.378	14.8965	109.203	6.7084	2.206	120.944	7.0425	0.2987	5.0129	41.2714	16.8098	1.2094	170.457	8.166	9.6521	2.0601	238.8	109.085	24.7488	15.7172	220.803	6.4842	172.814	41.9032
TM7_phylum_sp._oral_taxon_349	1.0168	0	0.1642	0	0	0	0.4797	0.7229	0	0	2.3465	1.5132	0	0.1078	0	0.3011	11.77	0.2305	0	0	6.0861	0.1751	1.0195	6.6143	0	0	7.2207	0.1896	3.0815	3.0219	1.0442	0.4119	0.0657	0	0.4699	0.2141	3.5117	1.5312	0.4137	0.5898	0	0	0	0	1.2634	0.9262	0.4331	0	1.9306
Alistipes_sp._6CPBBH3	2.3849	0.1042	931.179	215.073	199.874	297.933	435.894	91.9191	212.854	254.665	11.1938	2.5267	78.8575	2.5019	267.15	74.7374	7.7709	11.1826	130.623	748.303	2.8851	9.8659	2.806	60.0823	0.8725	140.968	19.3649	281.606	0.8718	4.8954	282.65	4.5787	0.2601	0.9872	117.091	34.5696	1.0225	418.857	10.5419	46.717	3.4405	408.937	120.757	3.2749	66.7411	648.448	18.6495	131.256	46.2236
Bacteroides_sp._4_1_36	16.0753	1.3486	63.699	66.2761	24.2404	187.885	68.3051	19.496	21.1687	73.9787	14.1821	3.1896	17.2897	6.0853	84.5676	4.8131	1.8539	12.4221	58.6666	25.0871	6.1577	0.892	3.3191	69.4179	1.8828	37.491	2.7737	77.4095	2.5458	10.9187	32.2503	11.0908	0.9397	0.2001	27.7007	27.7623	0.7203	40.357	8.9815	4.5712	1.6109	180.763	117.871	4.4015	20.6086	242.984	9.5151	32.4021	9.1302
Clostridium_sp._12(A)	8.2329	5.637	2.5411	0.9997	0.5643	6.287	5.1553	3.4504	14.0591	0	21.6719	3.1512	0	1.3015	19.1425	6.8328	0	0	5.2992	0	0.3415	0.9358	8.5963	6.6875	4.2596	3.0064	1.4161	19.5497	0	9.1183	40.7984	7.7142	0.6455	10.2391	77.2309	3.104	2.5974	5.7389	1.7202	30.9135	29.0643	1.8213	13.9583	19.7267	85.6512	0	0.893	11.1792	6.9086
Megasphaera_sp._BL7	0.4618	38.4275	647.744	0	11.8599	0	0	0	0.1615	2.0191	0.0657	9.9134	0.0486	0	0	0	0.1623	0	0.0874	14.6562	0	0	0	0.0331	0	0.0906	0.0152	45.1393	16.9085	0.0839	0.6116	0.3729	0.0922	0.1427	5.4155	1218.19	0.1242	0.1019	0.601	0.0598	0.1552	0.2885	404.858	0.294	0.2126	5.9303	0.2657	0.6738	33.6512
Pectobacterium_polaris	5.1431	0	0	0	0	0	0	0	0	1.4965	1.8228	0	19.5868	6.9883	0	0.1269	0.3073	0.242	1.4935	0	0	0	2.9449	0	0	12.1242	0.5397	0	2.6928	2.9103	0	0.6234	0.2367	2.3355	0	0.4496	0	0	0	0	0.5054	0.1619	0	0	0	0.4273	0	0	0
Butyricimonas_unclassified	22.1014	0.1808	44.7927	0.5719	28.1438	4.9915	3.3226	0	374.6	73.4766	8.5597	6.4292	1.9996	0	5.7212	490.612	1337.04	0	0.6997	3.976	0.6626	14.2059	72.0994	15.8105	2.414	35.5935	4.7542	1.7397	2.1881	0.154	10.287	0	0	0.5167	4.9694	0	0	15.5466	2.2065	0.4591	0.4088	2.131	21.5042	1.6986	0.4066	14.0258	0.7512	33.0884	0.4003
Desulfovibrio_piger	61.9471	0.369	231.371	195.51	227.005	183.943	82.6134	23.5987	1593.84	119.344	94.0365	53.1339	27.0421	0.6785	102.397	49.3453	9.0359	6.6096	51.9729	175.681	1.6695	6.3573	4.367	117.721	14.9383	198.809	36.5887	102.304	17.2275	2.1997	149.55	4.5651	7.2248	8.611	82.5964	26.1081	2.0583	816.174	6.1548	15.1993	5.8957	375.4	1847.85	35.8548	13.698	1761.91	17.1316	196.283	55.1386
Eubacterium_eligens_CAG:72	7.1398	0.093	7.2816	11.1039	9.1309	0.8787	19.612	5.8023	14.634	25.3661	9.0921	2.9463	2.6326	0.104	0.2373	2.5513	2.1247	4.279	2.3732	9.2436	3.6351	7.871	3.9789	0.3018	1.8852	1.3203	1.1845	2.6114	1.3316	4.2224	2.9451	1.1999	0.0317	1.9762	35.5345	4.4134	0	13.5199	2.1763	0.7713	0	17.2171	11.1359	7.8475	16.196	7.2977	0.6722	20.2909	0.4244
Prevotella_sp._CAG:1320	0.0432	0	44.3189	0.097	74.0746	0	0.0438	0	39.4764	0	0	0	1.8231	0.5805	0	0	0	0	0	26.0308	0	0	0	0	0	0	2.7591	0	0.1113	0	0	0	0	0	0	0	0	0	0	0	0	22.348	0.1333	0	0	0.0618	0	0	0
butyrate-producing_bacterium_SS3/4	2778.58	44.0643	442.771	204.847	752.409	446.43	2427.44	2531.64	1494.38	400.033	1493.72	382.537	33.586	91.6198	731.04	1336.07	137.815	805.318	796.889	250.691	254.301	461.25	3853.58	271.113	1773.74	166.026	533.729	715.98	278.875	909.002	430.138	389.245	59.9274	808.173	198.878	262.94	34.1135	459.27	174.755	389.125	181.787	193.375	1159.06	3610.09	685.622	190.988	106.451	752.004	1894.01
Ruminococcus_sp._AF14-5	29.8595	14.2684	25.7639	14.8915	15.3998	33.9003	48.3442	41.9092	15.4769	97.2754	32.9052	42.6197	36.6473	33.9021	91.7464	17.5057	59.6959	104.255	39.6119	51.0263	102.577	22.072	56.8874	144.733	89.4218	54.2222	55.6541	19.8774	48.6932	73.4599	47.3379	65.158	42.1452	40.805	36.1558	62.4408	17.4078	128.63	125.146	49.6848	42.1067	9.2385	103.397	53.3546	30.3595	30.1119	95.6559	67.2575	37.7713
Citrobacter_sp._wls619	33.6129	43.2389	8.6626	10.4078	46.1467	11.8281	32.0891	33.9995	34.2218	97.6209	59.6064	60.9856	185.764	167.663	25.3835	72.8451	78.3558	121.331	98.2668	49.5384	55.3577	140.913	127.834	61.4311	132.268	95.6445	84.0726	28.9945	65.3608	122.623	34.1575	79.8388	174.981	117.906	19.0173	58.668	86.5519	30.6389	23.6458	165.581	177.923	13.1435	26.4708	61.4647	135.798	26.2834	57.1707	89.1292	66.8824
Pyramidobacter_unclassified	11.1756	0	0	0	0	0	0	0	0	0	0	0.5691	0	0	0	0	0	0.4723	0	0	0	0	0	0	0.3036	0.097	0	0	0	0	0	0	0	0	0	0	0	0	0	1.149	0	0	0.4495	0	1.4198	0	0	0	0
Actinomyces_culturomici	0.1471	0	0	0.0473	0	0.2941	0	0.0816	0	0	1.938	0.3389	0	0	0.1161	0.0358	0	0	0	0	1.0542	0.3367	0.2436	3.1881	0.7544	0.2631	3.2945	0.0642	0.2171	0	1.6714	0.6268	0.1781	0	0.7843	0	1.4684	0	1.2044	2.0146	0	0	0	0.0956	0.1314	0	0.4561	0	0.1
Lachnoanaerobaculum_sp._ICM7	0.5691	0	0	0	0	0	0	0	0	0	0	10.961	0	0.1339	0	0	0	0	0.1931	0	0.1222	0.3704	0	0	0	0.1028	1.7538	0	0	0	0	0.3041	0	0	0	0	0.053	0	0.0823	0	0.2713	0	0.6743	0	0.2409	0	0	0.1713	0.2555
Streptococcus_salivarius_CAG:79	5.2749	2.5625	0.2761	0.3449	0	0.3113	0.5666	0.5409	4.2396	0.5807	26.4052	61.3772	0.2409	0.7762	2.4964	0.7633	6.9302	17.3756	0.2367	13.6807	2.0813	6.3519	30.9099	59.0839	12.2737	0.7731	13.3571	1.8616	3.087	0.157	32.5316	115.435	0.6671	0.3141	0.1833	27.1563	2.0615	0	15.3396	68.7774	3.0313	0.8817	56.7188	5.6875	9.7299	3.4376	116.966	30.3139	15.1542
Roseburia_sp._OM03-7AC	4.1234	0	0	1.2684	1.5189	1.6653	3.3071	0.7297	0	50.2414	1.9165	0	0.289	0	2.5951	0	0	0.6108	6.2556	6.8559	0.1404	0.1004	0.6193	6.5705	0.4487	0.5015	0	0.3828	0	0	2.3524	0.5244	0	0	2.2221	11.7243	0.8746	18.9611	0	0	0	0	6.2013	0.7075	0.7834	40.7136	0	89.7118	0.8768
Faecalibacterium_sp._An121	0.2589	0	0.3119	0.6625	0.34	4.1361	5.444	8.6752	0	24.6677	12.4661	0.169	0.0863	0.2163	0	0.2537	7.6024	0.1823	0	2.3568	0	1.0741	8.2502	0.3923	5.6203	0.3742	6.1396	20.1322	7.6939	0.1386	0.2331	10.642	0	0.2803	0.395	0	5.2607	2.9014	0	0	0	0.4877	1.4422	0.5779	26.079	6.4145	0.0396	3.48	0.0222
Bacteroides_heparinolyticus	9.5538	0	45.9762	26.5799	7.5202	200.289	48.1809	10.4081	67.6037	90.9635	3.1529	0.4115	19.2563	0.4087	68.7267	6.3177	0.1491	6.4453	81.8427	166.738	0.1307	0.3736	0	35.1405	0	4.9178	0.3276	41.3378	0	0.2017	75.574	2.6811	0	0.2213	44.0447	10.5531	0.2864	85.1585	1.3804	0.6817	3.7784	85.5477	4.5321	4.6506	2.0205	262.112	1.6946	60.6771	16.4815
Bacteroides_sp._CAG:661	0.1658	0	1.1527	0	0	15.4617	0	0	5.5432	0	0	0	0.3188	0	0	0	0	0	1.2125	1.6206	0	0	0	0	0	0	0	0.2111	0	0	0	0	0	0	0	0	0	0.408	0	0	0.1876	3.9055	0	0	0	0.9091	0.6286	0	0.3289
Clostridium_fallax	19.6025	0	0	0.1297	0.6408	0	14.8289	15.2379	0.5782	0	0.1764	0	0	0	0	0	0	0	0	0	0	0	0	0	0	0	0.1393	0	0	0	0	0	1.9336	0	0.3823	0.1741	12.2169	0	0	0	0	0	0.3567	0	0	0	0.2034	0	0
Bacteroides_sp._D22	128.38	0.9726	191.424	1175.39	131.433	269.452	177.901	40.3487	369.291	181.679	18.384	13.5392	213.374	2.4352	1323.6	110.692	10.2558	11.3616	390.809	1416.81	43.4711	0.9831	8.2589	97.3334	15.1579	78.7899	2.2996	268.042	1.8451	9.0807	222.585	61.083	1.3355	25.2764	155.603	98.5499	0.2984	114.018	51.6829	13.0937	14.2118	386.734	46.825	411.717	41.5901	1551.97	18.8895	616.812	17.8601
Faecalibacterium_sp._CAG:74	14.3828	5.7228	259.584	3.926	5.2097	5.3009	69.4143	41.9367	0.262	215.481	6.5254	35.1966	14.424	0.2906	0.5371	0.6031	47.1134	73.3868	0.1931	33.1458	0.9008	10.3508	4.1071	5.3358	0.5231	2.4775	10.9224	3.4688	2.3323	4.2841	3.2554	3.811	1.917	3.5189	1.2697	1.1992	0.6258	13.0519	4.1847	6.8696	2.0058	2.21	8.9895	1.0242	13.0284	8.0764	2.6494	8.4244	4.8464
Blautia_sp._AM28-36	15.7533	5.0212	13.1292	5.3123	22.9826	10.2258	34.8501	65.4585	18.8394	43.8744	25.1673	8.0156	4.4516	14.2943	28.6786	16.3899	2.9336	29.2106	15.8468	6.8475	30.3358	17.6174	23.2164	11.1013	33.281	49.6667	39.065	35.2205	10.4916	34.9611	18.2739	24.0857	0.7261	9.013	11.1106	33.7232	3.3395	61.2149	6.7086	14.1152	9.3722	7.8373	61.7351	40.1922	35.0066	9.1767	5.7319	37.7155	22.5587
Eubacterium_limosum	28.0214	0.0296	0.257	1.2069	10.8593	2.0115	6.7426	8.4548	1.205	0	10.1167	5.3157	0.3903	1.0394	0.1826	7.4997	0.2183	0.55	0.0579	1.946	2.7442	1.9524	0.2642	0.2611	0.4106	6.2089	0.3991	0.1885	6.1851	1.921	0.5608	0.8948	0	0.6954	21.4297	4.1799	0.5282	0.1055	1.1596	1.0625	2.1491	0.7186	7.1959	3.5984	10.6206	0.5746	5.4854	7.1972	10.6699
Enterobacter_sp._KINAN-G	0.2963	0.1867	0	0	0	0	0.8125	0.5827	0	1.8384	0.6615	0.3014	1.0386	1.0865	0	0.2556	2.6801	0.1626	0.3135	0	0.1682	0.3206	0.4327	0	0.2986	0.1335	0.1208	0.89	3.0088	0.2327	0.2348	0.2093	3.1509	4.7049	0.199	0.5285	0.6701	0	0	0.1665	2.1022	0	0	0.7591	0	0	0	0.7786	0.4493
Pseudomonas_sp._G5(2012)	1.7492	0	0	0	0.1199	0	0	0.2527	0.435	0.1379	0	0.1154	0	0.0193	0.5392	0.1108	0	0	0	0.05	0.0809	0	0	0	0.7769	0	0.244	0	0	0	0	0	0	0.5714	0	0.0772	0	0	0	0	0	0	0	0	0	0	0	0	2.028
Candidatus_Gastranaerophilales_bacterium_HUM_17	1.454	0	1.3899	0.0736	1.7838	0	1.0623	0.4443	0.9836	1.7739	0.2001	0	0.6789	0.3006	0	0	0	0	0.1084	0.1278	0	0	0.1069	0	0	0.1309	0.0395	0.2643	0	2.5465	0.3911	0.0912	0.0458	0	6.7639	0.6909	0	1.5845	0.4061	0	0.1174	0.7108	0.3034	0.0839	3.291	0	0.6102	1.745	0
Agathobaculum_sp._Marseille-P7918	2.707	9.0076	10.7669	2.7133	2.7325	2.0099	22.9964	44.286	1.2618	36.8296	34.7736	28.4832	5.4186	0.4624	9.3845	21.2623	4.1533	12.9495	8.9647	125.511	2.3377	7.1656	9.5835	13.1927	17.8063	28.0248	6.0977	2.18	2.5592	8.8001	18.1539	8.5339	0.2761	2.0931	7.3485	3.5692	8.2538	39.1153	20.0992	9.8193	10.2199	2.2684	25.9143	12.5699	12.7811	16.0828	9.086	17.5611	4.3996
Bacteroides_sp._AR20	1.8596	0	9.7936	6.0155	19.0985	3.3514	2.3342	0.4054	55.4224	4.6893	1.7867	1.1977	2.6703	0	1.8756	2.0367	0.7583	0	6.5413	50.0321	0	0.0593	0	10.7148	0	4.7036	0.2364	2.5085	0	1.1835	1.4358	1.681	0.0196	0.1227	2.6482	0.0558	0.045	7.2123	0.0418	1.6287	0	4.6	0.0572	0	2.9064	14.8828	3.3658	6.7089	0
Bacteroides_sp._44_46	0.399	0	5.7619	0	0	66.4784	0	0	16.9625	15.2937	0.5468	0	0.529	0	0	0.1445	0	0	15.0037	5.0806	0	0	0	0	0	2.2885	0	0.5185	0	0.0611	4.096	0	0	0	1.4222	0	0	1.5497	0	0	0.3516	20.7309	0	0	4.7565	0	0.2522	0.3774	3.1178
Pseudobutyrivibrio_sp._JW11	9.4908	0	0	0	0	0	0	0	0	0	0	0	0	0	0	0	0	0	0	0	0	0	0	0	0	0	0	0	0	0	0	0	0	0	0	0	0	0	0	0	0	0	0	0	0	0	0	0	0
Bacteroides_sp._43_108	65.0022	0	44.8524	40.6554	35.9756	6.6916	7.126	0.9187	29.5662	9.4445	2.0449	0.326	5.8973	0.029	11.3956	14.3623	0.2752	0	2.9701	22.5896	0	0.0484	2.4458	5.9642	0	0.7409	0.4605	16.7257	0.922	8.5994	76.5126	0.1107	0	0.0209	6.0026	1.8104	0	16.6351	0.1791	0	0.2934	24.1176	7.329	0.1667	1.1096	39.8769	1.0302	12.3532	17.8224
Paraburkholderia_sp._LD6	0.069	0	1.222	0.0494	0	0	0	0	0	22.9626	0	0	0	0.0764	0	0	50.7856	0	0	0	0	0.317	0.1086	0	0	0	0	0	0.227	0.0818	0	0	0	0.0551	0	0.1327	0	0	0	0	0.4772	0.1911	0	0	0	0	0	0	0
Firmicutes_bacterium_CAG:176_63_11	0.8627	0	12.2454	0.1574	0.4864	0.3131	125.695	46.197	2.1097	22.356	1.7801	0.0927	0.1697	0	0.4981	0.2039	4.7027	0.5204	0.3998	241.102	0.4534	0.1445	0.2228	0.6305	0	0	0.4645	2.4201	0	0.6712	1.4083	0.3589	0.0318	0.2639	0.4539	0.1815	0	1.777	0	0	0.5711	0.0653	70.8206	0.4665	0.6341	1.9116	0.3121	5.4041	0.3227
Butyricicoccus_unclassified	114.366	180.943	255.867	113.422	165.809	420.255	314.593	429.588	183.438	338.125	234.183	39.1478	26.9899	19.3204	243.972	213.58	133.984	337.95	163.941	179.961	212.305	269.767	462.334	201.5	278.211	215.041	64.4569	86.777	150.866	195.344	200.08	159.159	29.8811	34.5164	289.491	229.864	47.4081	441.458	251.195	218.423	163.494	86.6918	328.077	186.807	460.019	122.583	123.156	367.743	197.453
uncultured_Flavonifractor_sp.	75.2409	9.1797	122.589	30.8924	67.0997	49.923	300.668	437.217	85.361	205.22	140.806	52.4489	37.8069	28.215	96.5799	75.1566	43.7707	321.294	66.4769	120.946	95.798	36.0632	201.571	94.0372	229.272	175.616	34.6463	34.1778	43.6838	194.627	167.812	272.003	39.3581	60.4517	63.2852	68.9826	15.6398	151.341	80.0196	350.239	54.2473	46.1704	366.758	88.6929	246.134	41.7112	143.726	202.706	49.3205
Oscillibacter_sp._PEA192	60.2751	20.1824	77.2439	59.2922	76.7403	86.3377	115.938	121.18	71.5543	271.079	55.6196	37.8983	7.3596	1.3433	29.3807	25.9255	12.0163	102.159	42.3732	34.4817	42.2367	15.794	28.2048	46.5259	139.818	48.9187	8.3207	42.2772	42.3721	15.4469	52.3295	80.9637	3.9954	5.3844	93.8977	57.8667	5.8912	25.6768	55.5185	28.7532	10.277	45.8615	47.6371	23.4166	55.7253	95.9478	14.3839	55.2975	137.545
Clostridium_perfringens	16.6402	11.6553	27.1718	6.5607	23.4314	13.8981	24.8453	28.412	18.3596	24.058	44.564	30.0031	10.4598	4.7737	21.2204	25.9696	31.5931	32.0624	30.5536	17.2388	147.084	13.2026	70.484	20.6593	90.8892	42.466	25.7864	50.9236	62.5215	23.711	135.703	40.0234	6.7434	19.1774	60.0973	25.5982	20.2315	65.7435	12.7457	45.936	8.1413	15.6285	69.0825	49.788	80.8477	13.1886	22.944	27.886	25.0221
Alistipes_sp._AF17-16	24.4401	0	23.2358	0.9354	8.2801	14.6407	2.3473	0.5119	3.4907	5.5263	0.1111	0.0489	2.1468	0.0352	0.2625	4.0934	0.4253	0	2.6106	29.8027	0.0862	0	0	0	0	2.4401	0.0245	1.7287	0.0938	0.0338	40.2369	0	0	0	0.0538	1.2244	0	3.71	0.0687	0	0.4644	0.0395	11.243	0.0197	0.6658	6.8886	1.4378	1.5691	0.0322
Bacteroides_sp._AF36-11BH	0.9143	0	15.2363	25.769	8.9658	6.6522	74.9754	13.5189	1.5502	132.129	2.9854	0.0526	12.5777	0.0328	43.3552	2.9626	2.14	7.6874	62.5192	266.387	0.9667	0.418	0.054	29.5123	0.1945	3.179	0.0527	57.564	0	0.157	23.6222	0.3161	0	0	24.946	10.7027	0	128.221	2.9394	0	0.8664	41.1497	0.6389	0.2118	0.4298	331.457	0.283	79.6173	0.2425
Blautia_sp._Marseille-P3201T	37.6478	33.7395	30.5986	11.1099	23.7172	4.6062	9.215	11.148	2.5857	46.8425	25.6195	38.3801	0.3709	78.3281	6.849	21.3786	6.4152	29.3221	13.1867	4.9156	29.0417	48.6427	42.9678	22.6104	10.1405	6.8286	21.9965	3.8	39.6031	7.1684	22.7624	6.3242	161.424	48.0455	32.7101	14.3195	43.1534	6.1872	18.3297	22.6634	15.389	10.887	10.1589	27.3126	25.2317	7.9808	41.3477	41.5775	47.6266
Lachnobacterium_bovis	35.7914	36.7824	1.4117	0.699	14.3641	1.5099	7.8606	11.606	9.7577	21.0851	57.0017	0.6696	1.7865	1.373	0.2092	48.9068	0.4191	14.7091	28.2747	2.8023	36.3504	62.6704	17.7095	50.9346	22.364	15.9978	3.6602	1.6278	9.967	25.3877	22.365	7.5234	7.0436	0.0637	0.1507	30.3665	0.2864	17.8069	6.7702	74.123	5.7118	13.7759	18.5309	44.7704	43.5931	8.0938	24.142	3.3416	0.9583
Clostridiales_bacterium_59_14	1.6627	0	11.9284	0.4458	5.9827	0.0596	130.696	64.161	14.2617	25.2796	26.0474	1.1855	6.3323	0.0359	0.2543	0.7991	27.3098	18.7567	3.4499	228.978	5.0818	0.0332	1.2095	3.1283	5.8523	5.6344	0.9186	0.3077	2.2533	2.9571	13.3592	9.0308	0.045	0	2.6855	4.7182	0.0165	167.195	0	1.2629	0.0451	1.012	35.9176	0.2285	5.7218	7.0975	0.217	76.3481	1.1246
Prevotella_sp._BV3P1	22.6179	0	10.3619	1.2328	3.58	14.5391	3.8886	0.4531	0.8453	16.2469	0.4993	0	0.4365	0	2.6011	0.5694	0	0.0543	4.1698	22.4038	0.0375	0	0	0.0881	0	1.2102	1.4673	1.1738	0	0	46.8256	0.1866	0.0177	0	0.2304	0.0505	0.2117	15.9649	0	0	0.1739	0.901	0.8857	0.0324	0.1045	1.5916	0.0472	2.6823	0.0473
Staphylococcus_aureus	454.221	992.853	307.422	272.862	885.759	421.467	809.755	1150.94	698.801	1160.55	1282.3	1744.75	844.443	977.99	610.98	982.308	3875.66	1778.9	991.575	785.088	1291.64	1520.45	2305.53	1272.79	1923.2	958.334	1397.22	1113.08	6571.25	1118.04	1991.14	3370.86	1363.24	1173.81	779.548	5089.39	7441.2	766.405	1324.69	2919.03	1690.7	1066.87	2271.97	944.693	2029.02	699.365	1845.31	1574.74	8858.71
Bacteroides_nordii	24.4308	0.1676	73.8302	45.0532	20.5224	26.2974	29.2963	9.4184	64.6716	37.6489	6.0554	0.6793	15.6746	0	97.2313	17.3612	0.508	0.6655	33.0624	94.6196	1.539	0.5936	0.9083	49.4619	0.2613	8.0511	2.0513	38.7757	0	0.5136	106.028	4.7877	0.4057	1.0057	81.0829	2.4224	0.081	32.6376	1.4601	0.556	0.9428	32.1591	18.6861	9.8999	3.4364	78.0265	2.3536	61.5766	51.0317
Rothia_kristinae	0.2566	0.305	1.3635	1.839	2.6426	2.1948	3.9834	0	2.1857	0.3285	2.5008	3.5459	1.2572	0	0.6772	1.1138	0.3373	1.8596	0.4098	0.9585	0.5497	0.655	0.8081	1.7224	1.9517	1.0907	0.7898	0.2498	2.5333	0.9126	3.3253	1.8246	1.3854	0.7177	1.9511	1.974	2.1901	4.8524	1.6614	3.2654	0.3328	0.8885	6.0689	1.11	1.5334	2.3448	0.9227	2.1813	1.1672
Desulfotomaculum_putei	11.986	0	0	0	0	0	0	0	0	0	0	0	0	0	0	0	0	0	0	0	0	0	0	0	0	0.2021	0	0	0	0	0	0	0	0	0	0	0	0.8646	0	0.1261	0	0	0	0	1.6576	0	0	0	0
Schizopora_paradoxa	0.0497	0	0	1.0695	3.0737	2.8365	3.2819	0	0	0	0	0	0	0	0	0	0	0	0	0	0	0	0	0	0	0	0	0	0	0	0	0	0	0	0	0	0	0	0	0	0	0	0	0	0	0	0	0	0
Prolixibacteraceae_bacterium_XSD2	0.0758	0	0	0	0	0	0	0	0	0	0	0	0	0	0	0	7.3262	0	0	0	0	0	0	0	0	0.1934	0	0	0	0	0	0	0	0	0	0	0	0	0	0	0.0492	0	0	0.1406	0	0	0	0	0
Anoxybacillus_unclassified	0.1375	0	0	0	0	0	0	0	0	0	0	0	0	0	0	0	0	1.2814	0	0	0	0	0	0	0	0	0	0	0	0	0	1.1001	0	0	0	0	0	0	0	0	0.1784	0	0	0	0	0	0	0	0.4171
Tepidimicrobium_xylanilyticum	1.0099	0	0	0	1.3002	0	0	0	0	0	0	0	0	0	0	0	0	0	0	0	0	0	0	0	0	0	0	0	0	0	0	0	0	0	0	0	0	0	0	0	0	0	0.3318	0.2081	0	0	0.1513	0	0
Aquabacterium_commune	0.4054	0	0	0	0	0	0	0	0	0	0	0	0	0	0	0	0	0	0	0	0	0	0	0	0	0	0	0	0.4003	0.5768	0	0	0	0.486	0	0.2339	0	0	0	0	0	0	0	0	0	0	0	0	0
Bacteroides_stercorirosoris	1.8445	0	4.1023	7.5055	1.5771	9.0263	16.284	6.3304	0.864	17.6785	0.4608	0.0392	2.1182	0.0651	11.3523	1.2992	0.5122	2.8148	3.4411	25.4974	0	0.0261	0	10.765	0	1.9524	0.5603	6.2473	0	0.3807	8.5564	0.2927	0	0	8.8129	1.1665	0	30.4021	0.6176	0	0.0511	5.8028	0.6673	0	2.5941	34.8707	0.1981	24.2934	3.1255
Veillonella_ratti	91.0384	35299.2	13.5039	0	0.8149	1.3331	1.4727	0.0573	0.0804	0.6652	0.0576	0.3662	0	0	0	1.1703	1.9064	0.1178	0.1661	0.6022	0.1389	0.5748	1.2482	1.7271	0.2671	0.1251	0.2928	0.4702	0	0	0.5595	0.2958	0.5141	0.0746	0.3912	0.2108	0.3797	0.9269	0.1938	3.9538	0.362	0.6722	2.1074	1.0592	1.5548	0.697	0.5421	0.7331	1.0296
Clostridium_sp._CAG:245_30_32	3.6456	1.7931	9.271	0.5776	2.0493	4.3864	7.8905	8.8917	11.2372	12.5568	37.4581	6.5831	0.1933	0.2357	8.9347	13.4821	18.6901	3.4078	24.206	3.4236	6.512	1.228	8.901	16.9015	4.5635	5.5365	4.4503	1.3766	3.3851	1.8179	255.205	7.8366	0.4633	0.2905	0.2573	51.7407	1.123	12.0416	2.5988	6.2682	3.1951	0.5512	12.5242	3.1141	16.3363	37.5882	26.7914	11.5108	4.9744
Leuconostoc_suionicum	0.1541	0	0	0	0	0	0	0.286	0	0	0	1.0651	0.4531	0	0	1.2546	0	0	0	0	0	0	0.7281	0	0.5276	0	0.3558	0	0	0	0	0	0	0	0.3907	0	0	0	0	0	0	0	0	0	0	0	0	0	0
Citrobacter_sp._wls829	0.584	1.104	0	0.041	0	0	0.77	0.2454	0	8.8831	0.367	1.736	10.2748	8.3448	0	0.9889	45.7629	2.7432	1.8044	1.9468	0.3314	3.5944	2.1767	0.7109	2.8491	3.1273	2.458	1.1488	3.0872	3.6794	0.1408	2.5434	6.5775	6.8605	0.7102	1.5554	4.5827	0.1369	0.0339	2.3572	8.0705	0.0652	0	1.8065	1.9815	0	0.0846	0	2.3811
Haemophilus_unclassified	3.3518	0.5904	0.8195	0	20.497	0.7999	0.209	0.0741	0.0974	112.598	0	8.6976	0.0953	0	0	6.8068	6.9079	30.7917	0.0783	6.0734	0.4418	25.3021	8.7713	0.5157	18.6437	0	1.0937	1.2984	0.1753	0.0621	2.293	1404.92	0.8607	9.8073	1.7226	0.5312	0.1943	0.2014	141.139	1.3611	0.3855	5.1932	72.8708	3.1516	0.1094	0.1793	3.6763	30.0385	6.7883
uncultured_Butyricicoccus_sp.	50.2346	33.1724	91.1347	33.8803	82.9258	146.041	137.435	225.059	77.1716	83.9625	101.424	23.211	43.3594	44.0115	42.1931	46.6497	21.6192	210.023	47.1177	73.7701	95.0945	22.7389	176.61	26.7357	125.873	98.8982	35.4508	40.4983	58.8349	73.8552	49.6253	68.5002	5.2124	39.6166	60.0969	141.953	0.9717	103.004	41.7482	74.829	52.0485	28.6216	163.337	112.74	137.712	49.6907	26.0926	99.7559	105.943
Corynebacterium_belfantii	0.0457	0.0543	0	0	0	0.7816	0.3547	0	0	0	1.3359	1.5785	0	0.0379	0.0603	0	0.5406	0.1419	0	0	1.6641	0.3149	0	0.6901	0.1043	0	1.1075	0.1334	0.6767	0	0	0	0	0	0.3474	0	0.8509	0.1994	1.7258	1.381	0	0	0	0.0847	0.273	0	0	0	0.5196
Roseburia_sp._AM23-20	11564.5	3696.59	104	85.4519	183.627	37.6994	489.118	357.587	227.493	2597.47	7507.35	22.9087	126.58	189.53	336.679	2287.04	116.875	495.325	2021.16	96.621	3448.26	6046.45	219.43	3088.18	1450.8	656.14	117.472	129.675	978.314	746.177	2320.11	475.376	78.3345	140.2	31.8877	2645.73	27.6599	313.548	636.509	1600.4	100.28	1732.29	665.805	5444.09	454.421	2576.66	165.819	693.058	57.3441
Bacteroides_sp._2_1_22	562.129	0.9208	1110.38	1775.22	722.359	489.738	414.986	75.3401	408.477	723.068	46.2806	7.1484	301.026	2.1431	1349.77	324.94	17.1513	19.8318	300.311	1620.18	11.1533	6.9901	7.2083	304.606	12.6107	132.922	7.7239	433.959	2.125	3.944	284.68	52.1219	0.2101	13.9605	317.82	82.6061	0.2872	843.375	23.2232	9.253	16.3494	463.183	240.087	362.928	25.3289	1965.58	13.0757	585.785	153.753
Clostridium_sp._CAG:217	21.465	2.5232	121.099	68.4361	98.2074	70.6703	41.5223	10.251	419.709	189.619	516.4	13.997	29.8046	9.4403	34.2134	20.2342	62.7107	11.2751	38.0661	108.108	8.3666	4.5613	4.9195	19.4879	7.3488	57.5883	11.6409	44.0867	8.8767	7.3736	158.648	2.962	7.1504	11.5444	19.4978	5.8331	5.9284	48.4148	5.3968	9.3062	11.0528	144.353	1381.51	10.0258	13.0726	92.6786	22.0856	68.4743	24.0098
Batrachochytrium_dendrobatidis	1.2266	1.745	1.3128	4.052	17.4053	8.0121	8.6365	12.3265	16.9599	15.9168	13.3016	53.6999	27.0259	5.6662	13.008	8.0225	11.9611	14.1303	9.536	19.8265	8.1219	7.2576	8.9542	30.5384	25.9524	4.8346	8.3139	11.6241	19.6505	14.4952	7.235	7.1718	2.5538	3.3296	4.9527	5.4715	9.4795	21.5159	3.5468	7.2369	3.9445	10.6201	63.3686	20.0267	14.0089	18.9968	11.811	18.5571	7.1854
Eubacterium_oxidoreducens	16.912	0	0	0	0	0	0	0	0	0	0	0	0	0	0	0	0	0	0	0	0	0	0	0	0	0	0	0	0	0	0	0	0	0	0	0	0	0.0927	0	0	0	0	0.2513	0	0	0	0	0	0
Bacteroides_sp._AF29-11	11.2544	0	12.1671	13.3684	8.0329	16.9795	6.6325	1.0332	0.5532	76.4945	0.9276	0.0456	5.9153	0	28.0459	6.3227	1.3002	0.4447	40.4827	121.286	0.3005	0.3978	0	17.3395	0.2095	3.5273	0	56.3731	0	0.5775	26.0649	0.7056	0	0.0238	13.444	5.3899	0	69.3702	0.3632	2.2895	0.1712	38.4764	3.8937	2.5114	1.4311	65.543	0.7584	43.6897	2.2011
Succiniclasticum_ruminis	21.3647	0	0	0	0	0	0	0	0	1.1056	3.8259	0	8.5971	0	0	0	15.533	0	0.1339	0	0	0	0	0	0	0	0.5135	0	0.2584	0	0	0	0	0	0	0	0	1.1421	0	0	0	0	0.3095	0	0	0	0	0	0
Clostridium_sp._CAG:75	0.2154	0.1293	0	0.0287	0.0515	0.076	0.0517	0.099	0	6.2283	0.6238	0.1252	0	0.0221	0	0.0868	4.3936	0.4556	0.2555	0.3487	0.6989	0.0613	0.5112	2.5306	0.2481	0	0	0.0389	0	0.7862	0	0	0	0	0.0338	0.0385	0.3104	1.6609	2.8739	0	0.0705	0.2493	2.0077	0.173	2.1486	0	0	0.7368	0.2224
Sphingobacteriaceae_bacterium	1.3093	0	0	0	0	0	1.6332	0	0	0	0	72.5309	74.1432	0	0	0	0.6476	0.8014	1.5121	0.6116	0	1.437	0.3878	0	0	0.2986	0	0	0	0.1669	25.5145	0.0625	0	0	0.8888	0	0	101.41	0	0.0746	0.1521	0	0.1387	0.2591	0	0	2.3963	0	0.7825
Clostridium_puniceum	2.4379	0	0	0.6301	1.1777	0	0.9713	0.8611	0.6628	0.3188	0	0	0	0	0	3.1075	0	0	0.3012	0	6.846	0	0.2881	0	0.0976	4.5514	0.0987	0	4.3022	4.5758	0.3648	0	0	0	1.0138	0	0	0	0	0	0	0	2.3088	0.2261	0	0	0.2307	0	0.0648
Blautia_sp._CAG:37	16.4466	25.3356	6.2197	17.4542	11.6149	27.7573	13.434	16.0446	9.784	20.4301	13.8463	38.6826	49.0192	42.1132	15.0758	26.9194	28.1264	98.934	14.9551	13.2391	278.971	38.4345	239.133	20.3339	196.691	43.9384	28.301	12.219	50.3429	54.0807	57.8344	208.022	46.5703	50.2772	18.4462	37.4047	21.0289	16.24	28.273	56.7895	63.5188	4.631	34.3208	35.4828	152.818	4.8012	95.5242	4.0833	15.9166
Ruminococcus_sp._TF11-2AC	10.1894	18.2507	18.7096	7.0483	13.8592	13.7707	29.1186	28.8904	13.5662	49.1842	48.9004	8.5932	2.6776	4.5339	121.985	6.6138	40.3516	35.9939	33.3048	20.925	56.1117	19.0233	24.3521	95.9061	33.888	18.2211	51.3858	14.2192	33.6841	28.0468	31.4452	16.9828	21.9438	8.914	16.1574	37.8228	0.1018	175.058	91.7867	46.8713	16.6013	9.0564	87.8618	14.0552	32.3277	7.5803	98.9907	79.0175	49.2606
Paraeggerthella_hongkongensis	0.716	0.1367	0	0	0.444	0.4635	28.1127	43.5184	4.4073	6.6238	0	1.1741	0	0.1909	0	0	16.7774	0	0.0556	0.4295	0.739	0	0	2.8943	0.2624	0	0.5308	0.6715	0.5676	0.2045	9.9718	0	0.1164	0	0.5886	1.6585	0.1081	0.5018	20.6643	3.2922	0.2696	0	41.8367	0.3014	1.0374	0.6304	1.5504	0	10.5696
Eubacteriaceae_bacterium_CHKCI004	19.0742	7.8493	12.2	2.3218	10.7201	1.0515	14.9372	18.0136	7.1693	18.4088	38.1061	9.0269	0.377	0.3732	7.1336	11.432	7.3883	5.5102	2.5151	19.6001	10.5932	5.5283	10.0235	1.8163	10.6403	5.4708	2.7886	3.6996	12.4452	2.0914	2.0333	7.3796	8.1063	11.8875	41.8524	16.1234	2.4901	2.0694	0.3788	30.0735	3.5918	3.7474	33.2062	19.9681	20.305	12.2619	7.978	13.7284	1.1571
Anaerostipes_sp._494a	10.1721	0	0	0.1782	0.8645	0	1.8701	2.1851	0.6841	1.0281	0	0.3692	0	3.4925	0	0.4358	0	0.3326	0.9551	0	0	0.0856	0.0947	0.2695	1.5882	0.9895	0	1.1287	0.2643	10.0924	0.0774	0	0	0	0.5252	0	0	0	0.3467	1.533	0	1.7796	2.4151	0	1.0261	20.5483	1.8363	0.5683	0
Bacteroides_sp._1_1_30	213.912	1.2459	732.816	912.609	532.116	504.875	286.209	49.1336	322.534	410.225	25.3377	9.6012	208.449	0.4144	1139.71	163.268	20.2187	8.1634	260.384	1277.69	8.9518	5.8005	5.9276	215.361	12.3348	123.357	11.8611	235.236	1.4132	4.1816	262.063	41.1948	0.1084	12.8353	132.686	29.5441	0.2026	474.387	23.3685	33.2142	10.6647	710.047	127.514	239.493	44.3187	1187.77	14.5913	534.887	38.5913
Firmicutes_bacterium_AF36-19BH	149.246	50.8633	70.584	41.0933	93.5635	124.421	213.724	195.203	49.5968	132.302	111.73	11.1408	30.7068	5.3663	229.074	96.9526	73.5202	116.93	139.688	256.235	118.562	78.2087	76.0534	83.1554	73.8209	47.5059	17.5794	53.3539	23.5052	76.2542	145.709	124.276	8.5424	15.5441	48.5538	136.279	3.9559	418.359	47.7822	63.0274	25.7579	19.077	127.469	86.0938	151.801	152.918	26.1553	270.521	30.495
Anaerotruncus_unclassified	44.86	0	41.8366	0.8287	1.1793	2.8797	89.22	64.5655	2.6481	1.3517	2.2601	160.715	0.2967	0.9794	0	29.7167	0.0797	1.086	0.6035	3.0647	8.0438	13.8875	0.4434	8.4185	6.8059	8.9038	0	0.2761	21.1271	8.4787	1.0579	16.7662	0	1.4482	5.805	5.7329	0	2.4083	0.8556	6.099	0.485	15.9522	58.7683	4.241	15.4823	0.1948	2.9313	68.024	7.7855
Galactobacillus_timonensis	7.8837	0.3951	28.9682	1.072	3.5944	1.4304	44.507	37.2615	11.4672	11.745	48.9828	0.8564	0.3954	0.0552	3.6015	0.7034	33.0347	0.413	0	9.8208	2.7772	0.3149	1.7492	1.0353	17.5968	8.6474	0.3069	1.3861	0.8204	0.2364	3.6967	2.0469	0.4374	0.4383	1.0424	46.9018	0	6.3458	1.4769	1.097	0.4351	0.4834	15.1889	0.8628	1.5175	53.0346	4.3221	1.8367	0.9213
Bacteroides_timonensis	0.098	0	1.8459	0.6375	0.1917	0.9293	4.6175	0.8593	2.3249	1.3977	0	0	0.5818	0	0.8732	0.727	0	0.1541	0.6297	3.2292	0	0.0253	0	0.8328	0	0.0828	0	3.036	0	0	0.0495	0	0	0	0	0	0	0.6443	0	0.3158	0.0644	0.0687	0.2934	0	0	1.8004	0	0.4843	0.2759
Collinsella_vaginalis	3.2636	0	0	0	0	0	0	0	0	0	0	0	0	0	0	0	1.334	0	0	0	7.9528	0	0	0	2.6404	1.7135	0	0	0	0	0	0	0	0	0	0	0	0	0	0	0	0	1.3031	0	0	0.7456	0	0	0
Marvinbryantia_formatexigens	59.0961	58.6205	49.5788	16.4977	47.6102	116.1	79.4231	97.4719	25.173	63.8021	72.7331	115.931	11.0251	16.8488	100.823	100.487	87.4443	75.6972	63.0402	17.541	107.069	24.7438	89.8627	54.5798	68.7654	75.4295	16.2927	10.9232	45.1897	48.0112	87.3408	19.0634	99.8668	8.3289	39.9263	75.6953	12.8914	216.541	162.746	51.3313	37.6291	16.5943	67.2502	27.9488	579.798	42.0031	17.6429	102.87	53.7568
Fusobacterium_sp._HMSC073F01	0.4651	0	0	0	0	0	0	0	0.101	0	0	1.0743	0	0	0	0	0.0312	0	0	0	0	0.8837	0	0	0	0	2.2543	0	0	0	0	0	0.0112	0.0615	0.6354	533.948	0	0	0.1608	0.9669	0	0	0	0	0.0331	0	0	0	0
Alphaproteobacteria_bacterium	6.4906	8.1958	30.3214	0	0	0	0	2.6755	6.2814	3.5244	0	0	0	0	0	0	0	0	0	0	0	0	0	0	0	0	0	0	0	0	0	0.6991	0.0664	0.6286	1.3291	0	0	0.5721	0.2829	0.4171	0.3401	0	1.1627	0.6076	0	0.7188	0.3536	0.5572	0.1988
Firmicutes_bacterium_HGW-Firmicutes-21	9.7107	0	0	0	0	0	1.1225	0.1342	0	0	0.4228	0.329	0	0.06	0	0	0.1426	0.3106	0	0	0	0	0	0	0.1956	0.6067	0	0	0	0	0	0	0	0	0.2749	0.4172	0	0.1247	0.0617	0.5908	0.0469	0.0751	0.3378	0	2.9556	0	0.39	0.1537	0.4934
Dysosmobacter_welbionis	1.9618	2.4043	35.5287	8.3658	1.0692	1.9249	24.9724	3.4768	55.6898	4.797	6.4051	0	3.3435	0	2.1334	1.3128	0.7741	4.8253	4.292	3.1543	0.5066	3.0659	2.4805	25.184	0.7831	0.685	0.0277	73.5132	0	0.8361	11.259	4.4537	0.0683	0	10.3943	5.4641	0.4315	8.6358	11.0172	1.0154	0.6669	3.8995	16.3276	18.0866	13.4628	25.4407	9.8079	53.0119	0.723
Roseburia_intestinalis	15723.2	121068	4208.54	2507.76	2579.75	1202.2	14967.5	12103	6427.45	59997.4	128592	902.208	2901.56	4330.19	2883.47	90165.5	3067.23	10985.3	71735.9	2113.24	118365	199352	4623.21	110258	43758.3	7855.01	1967	4273.67	30360.7	29836.8	83634.5	15456.2	962.864	623.395	1210.93	99401	359.268	5940.03	16963.7	61503.2	1219.49	55848.7	18488.7	146962	9160.81	16523.5	3910.75	8658.25	1173.58
Firmicutes_bacterium_AM55-24TS	9.3721	578.094	23.4207	20.2227	43.5477	36.3653	47.2939	36.4388	18.7719	57.171	5.3335	1.011	31.2096	51.6866	443.752	77.1735	11.6081	396.743	135.679	99.3379	67.4076	4.7048	167.958	179.362	193.07	83.7029	1.785	12.421	2.452	85.4841	57.2799	99.1911	11.6961	1.2721	5.3026	87.624	0.1316	41.9179	73.9307	2.5045	1.0499	23.0891	6.2895	378.866	305.489	389.423	163.664	221.733	76.0195
Providencia_rettgeri	3.7468	0	0	0	0	0	0	0	0	0.369	0	7.7449	1.4122	2.2337	0	0.6256	2.2734	2.0889	0.2302	0	0	0	1.1346	0.4837	0.8769	0	0	0	0	0	0	8.7104	0	2.0732	0.487	2.7718	1.7892	0	0	0.917	11.9626	0	0	0	0.5741	0	0	0.4084	0.2914
Hygrophoropsis_aurantiaca	1.079	2.0226	5.9544	0	0.6411	0.355	0.3221	0	0	0	0	0	0	0	0	0	0	0	0	0	0	0	0	0	0	0	0	0	0	0	0.1241	0	0.042	0.0995	0	0.2395	0	0	0.1791	0	0	0	0	0	0	0	0	0	0
Streptococcus_sp._HMSC068F04	2.6013	1.6089	0.2199	0	0	0.5303	0.1606	0.3071	0.9971	0	15.6511	24.1553	0.0858	0.3088	1.0004	0.0337	2.8369	8.1254	0.1982	9.3357	0.6976	3.9541	14.9849	20.3538	6.7835	0.4006	6.4138	0.7638	2.7414	0.1409	17.9944	53.012	0.168	0.2396	0.262	14.1032	0.3048	0.3555	5.1406	22.6623	1.6365	0	25.0605	4.0754	5.2108	0.6541	21.802	12.8683	8.3939
Phellinidium_pouzarii	0.0708	0.2526	0.3765	0.7616	1.368	1.6159	2.612	0	0	0	0	0	0	0	0	0	0	0	0	0	0	0	0	0	0	0	0	0	0	0	0	0	0	0	0	0	0	0	0	0	0	0	0	0	0	0	0	0	0
Lutispora_thermophila	1.5263	0	0	0.0415	0	0	0.2999	0.1434	0	0	0	0	0	0	0	0	0	0	0.3703	0	0	0	0	0	0	0	0	0	0	0	0	0	0	0	0	0.3344	0	0	0	0	0	0	0.457	0	0	0	0	0	0
Desulfovibrio_fairfieldensis	3.2749	0	3.8476	0	0	0	0	0	0	1.9021	0	0.2628	0	0	0.156	0	19.1125	0.2867	0.6184	0.0714	0.1266	0	0	1.5499	0.0732	0	4.2047	0	0	0	0.0528	0	1.7852	0	0	2.5289	0	1.126	0.0778	0	0.9747	0.6549	0.16	0.0356	0.0539	0.6234	0.0518	0.0613	0
Coprobacter_secundus	7.1258	0	34.0812	2.8225	72.1345	9.7312	11.2083	1.6701	0.2396	8.2107	1.7546	0.0864	6.1743	0	17.8185	6.6546	0.2958	0	5.6604	28.1608	0	0	0	3.3988	0	1.5305	0.2597	2.519	0	0	6.1692	0.6001	0	0.3147	1.8062	0.6492	0	12.7667	0	2.8638	0	23.2196	0.8871	0.0695	0.7845	1.4395	0.4046	21.2025	0.3412
Citrobacter_sp._wls828	0.0779	0.2587	0	0	0	0	0	0.1094	0	4.3102	0	0.0679	0	0.0803	0	0.2756	4.7032	0.3756	0.2571	0	0	0	0.5141	0	0	0.0752	0.1919	0.5252	5.8761	1.5523	0	2.4506	0.0298	0.087	0.2452	17.9227	1.2948	0	0	0.0769	1.0878	0	0	0.3979	0.3049	0	0.159	0	0
Bacteroides_sp._CAG:633	59.1925	0	7.6428	20.1915	13.6301	43.2439	2.2149	0.2711	14.8998	8.3216	0.7887	0.3106	1.166	0	11.9701	5.6077	0	0.2905	15.159	46.2095	0	0.4131	0.6371	4.442	0	3.0243	1.414	45.6913	0	0	6.9077	0	0	0.3234	1.923	0.6997	0	10.0845	0.1577	0.2324	0.3644	14.6758	1.2295	4.001	1.1401	430.022	0	14.1269	26.4654
Lysinibacillus_sp._F5	0.0254	9.3037	0	0.0546	0.0981	0	0.6904	0.6601	0.487	3.5135	12.6309	0	0.1868	0	0.4024	9.0175	0	1.105	8.7051	0	8.7649	14.6331	0	8.9554	5.8565	0.5185	0	0.1484	0	3.1182	8.9677	1.694	0	0	0	12.3896	0	0.5545	1.9745	2.0212	0	7.4965	1.8031	16.9138	0.7593	0.836	0.0685	0.324	0
Ruminococcus_sp._CAG:177	22.117	11.4804	407.14	9.7028	41.0212	43.7861	49.636	75.371	25.3599	73.5481	180.732	13.2328	7.5119	12.2677	34.6123	23.3387	11.1669	64.3962	60.1724	32.9805	49.8313	18.3769	57.8602	18.2849	46.4224	73.6027	48.6774	60.1126	13.2134	34.375	1379.32	43.2268	2.9497	17.0328	22.7519	43.441	5.361	75.8576	17.8567	70.6267	16.1585	34.3267	472.395	52.4924	194.372	173.566	25.3433	68.2876	42.7724
Rhizobium_sp._AAP43	1.7156	2.0255	6.8926	23.6805	50.9103	45.0723	46.9701	0	0	0	0	0	0	0	0	0	0	0	0	0	0	0	0	0	0	0	0	0	0	0	0	0	0	0	0	0	0	0	0	0	0	0	0	0	0	0	0	0	0
bacterium_HR16	1.3682	1.6674	5.1675	16.5049	33.3349	23.7512	28.0218	0	0	0	0	0	0	0	0	0	0	0	0	0	0	0	0	0	0	0	0	0	0	0	0	0	0	0	0	0	0	0	0	0	0	0	0	0	0	0	0	0	0
Chloroflexi_bacterium_RBG_19FT_COMBO_62_14	0.4664	0.616	3.7637	9.7687	27.0867	16.6972	20.7169	0	0	0	0	0	0	0	0	0	0	0	0	0	0	0	0	0	0	0	0	0	0	0	0	0	0	0	0	0	0	0	0	0	0	0	0	0	0	0	0	0	0
Spirochaetes_bacterium	0.1307	0.0518	0.463	3.9808	9.0008	8.3218	8.1153	0	0	0	0	0	0	0	0	0	0	0	0	0	0	0	0	0	0	0	0	0	0	0	0	0	0	0	0	0	0	0	0	0	0	0	0	0	0	0	0	0	0
Beijerinckiaceae_bacterium	0.3925	0.3161	1.5924	3.0403	7.5556	4.2185	6.7178	0	0	0	0	0	0	0	0	0	0	0	0	0	0	0	0	0	0	0	0	0	0	0	0	0	0	0	0	0	0	0	0	0	0	0	0	0	0	0	0	0	0
Serendipita_vermifera	0.0407	0.0967	0.8642	2.6226	4.0041	3.13	4.8128	0	0	0	0	0	0	0	0	0	0	0	0	0	0	0	0	0	0	0	0	0	0	0	0	0	0	0	0	0	0	0	0	0	0	0	0	0	0	0	0	0	0
Firmicutes_bacterium_CAG:110_56_8	0.3467	0	13.4258	0	0	0	0.1129	0	0	0	0	0	0	0	0	0	0	15.7705	2.8341	0	0	0	0	0	0	0	0	0	0	0	3.9957	0.0776	0	0.0349	0	2.743	0.0677	409.078	0	0	0	0.0736	141.743	0.0657	0.0929	7.8726	0	0	0.0472
Flavonifractor_sp._An82	12.1222	0	5.0152	3.8091	2.057	0.3443	4.2552	2.654	12.6415	6.4825	7.2187	0.0401	0	0.0555	5.0418	0.17	0.1464	1.282	1.0362	2.553	0.7638	0	1.7864	6.2001	3.2061	1.003	0.2577	0.1104	1.6686	0.1354	5.19	0	0.071	0.1044	1.0584	2.3448	0	1.2301	1.9358	0.1254	0.1743	1.4972	4.6889	0.1184	2.7669	2.1364	4.0407	3.4266	1.3704
Streptococcus_hyointestinalis	0.6218	0.543	0.5712	0	0	0.3493	0.3129	0	0	0	1.8857	2.6859	0.0395	0.2231	0.3546	0.2625	2.5434	2.5874	0	9.1346	0.0576	1.0815	3.8893	9.0643	1.4103	0.3427	1.923	0.6278	1.7245	0	4.6836	17.3404	0.0816	0	0	2.9459	0.0626	0.1173	0.986	7.1815	0.7862	0	6.6735	1.1459	1.6861	0.7367	73.7771	3.7692	2.5131
Bacteroides_helcogenes	1.8807	0.0485	3.2362	5.8742	4.252	69.8754	8.7041	1.9671	14.903	25.0229	0.2385	0	3.3667	0	0.5381	2.4559	0.6433	0	10.2059	12.9176	0.0874	0	0	0.4106	0.2078	4.1289	0	1.548	0	0.145	4.4804	0	0	0	0	1.7569	0	2.9189	0	0.1297	0.3421	19.3267	0.5386	0.0756	1.0317	1.565	1.2097	3.7207	3.7291
Bacteroides_sp._3_1_13	22.3016	0.1053	36.9648	276.428	37.5284	148.293	49.9988	14.0398	49.3266	51.0477	8.55	2.7767	78.3355	0.2974	317.693	19.9571	0.5933	2.8497	66.8233	305.642	3.1286	0.6602	3.0156	27.6863	4.6328	16.7618	1.2895	61.9971	1.1139	1.267	30.4137	12.6463	0	5.6862	78.5417	7.5378	0.1706	58.092	11.746	0.7638	3.6934	49.6786	12.2527	150.378	3.8333	559.312	3.1094	160.297	2.8375
Clostridium_sp._PI-S10-A1B	39.196	17.7064	42.7717	5.848	5.508	7.052	20.8711	19.9883	10.9811	13.8971	29.0625	112.213	1.3195	0.8982	6.126	10.0569	0.5464	9.1064	9.0856	12.8558	0.3156	29.863	28.0048	3.4635	17.4219	20.4004	8.8745	6.5929	1.3193	5.9387	4.3174	5.1602	1.2921	7.4809	2.0697	13.9038	0.5651	23.5312	2.1443	4.3511	2.2598	4.2877	14.838	32.6914	26.2487	3.6768	38.533	40.2271	7.9565
Rothia_sp._HMSC072B04	0.3373	0.0969	0	0	0.7535	0	0	0	0	0	0.6408	8.388	0	0	0	0	1.2795	0.5066	0.2049	0.3046	1.3342	0.8573	0.0717	0.4306	0.3722	0	0.3949	0	0	0	0	0.5519	0.0866	0	0.8672	0	1.0515	0.4782	3.943	0.913	0	0	3.89	0	1.0223	0	0	0	0.8461
Synergistes_sp._3_1_syn1	51.2372	0.0583	0.7747	0	0	0	0.0995	0	0	0	0	2.5603	0	0	0.0338	0	0	1.4497	0	0	0	0	0	0	0.7995	0	0	0	0	0.1368	0	0	0	0	0	0	0	0.3619	0	5.6153	0	0	0	0	7.681	0.1257	0	0.5827	0
Streptococcus_sp._SR4	16.1975	5.8426	3.5643	0.1706	0.4309	1.1085	2.0533	2.8987	5.4339	0.5846	55.5437	114.78	0.4791	1.1673	4.8993	1.0494	27.035	46.277	0.8325	74.5427	2.4727	18.2714	72.6586	118.103	34.2798	4.054	24.9396	3.5337	11.4549	0.2978	77.8597	260.854	1.3828	0.4643	0	62.7628	1.7448	1.4627	31.0051	145.598	7.0617	1.2837	156.365	15.9186	19.6028	7.1468	115.946	57.6629	43.4789
Butyricimonas_faecalis	3.0483	0	25.3735	7.124	5.0331	8.9564	3.9295	0.4732	1.9489	11.0176	2.52	0.771	1.0248	0	9.2173	3.2228	0.1257	0	6.3375	23.8196	0.0683	0	0	0.404	0	2.7253	0	4.2967	0	0	12.3303	0	0	0	0.1985	5.3819	0	12.8019	0.1044	0.6086	0.1447	7.0935	31.0219	0.3587	0.1445	7.5749	0.5604	15.6602	2.567
Frankia_symbiont_of_Coriaria_arborea	0.1417	0	0	0	0	0	0	0.5258	0	0	0	2.937	0	0	0	0	0	0	0	0	0	0.434	0	0	0	0	0	0	0	0	0	0	0	0	0	0	0	0	0	0	0	0	0	0	0.4234	0	0	0	1.7188
Firmicutes_bacterium_CAG:176	5.4311	0	39.5761	2.2526	1.5084	0.6528	25.9004	9.6524	14.9221	3.6483	4.0463	0.1568	0.2105	0.1574	6.6794	2.5581	1.3518	0.693	4.2571	11.9569	0.6744	0.8501	1.9095	0.7895	1.2367	0.5215	0.4376	1.9374	0	0.195	5.843	1.8116	0.0959	0.6817	0.4637	0.1964	0	4.2534	0	0.6031	0.8605	0.0461	175.851	4.5687	0.9033	0.7171	0.2654	7.5907	2.2994
Murine_leukemia-related_retroviruses	2.372	3.326	11.2581	0.2354	0.941	0.7757	1.8263	9.6148	12.3409	9.3602	0	0	0	0	0	0	0	0	0	0	0	0	0	0	0	0	0	0	0	0	18.0403	13.1554	5.3986	4.5579	9.9995	13.671	10.1295	19.2434	8.7647	13.4008	4.77	2.1898	5.1807	1.6658	4.0429	4.2582	2.3783	4.8884	2.4761
Enterobacter_soli	0.2043	0	0	0.0732	0	0	0.6607	0.2527	0	0	0	0.4705	2.1018	1.47	0	0.4434	5.1023	0.6345	0.4894	0	0	0.73	0.3217	0.1714	0.6992	0.6078	0.7859	0.3977	5.7144	1.1504	0.2036	3.4499	1.3097	1.3877	0.4315	1.2769	3.4079	0	0	0.4333	1.3689	0	0	0.1262	0.2035	0	0.0918	0.1447	0.3098
[Eubacterium]_siraeum	395.534	349.186	1114.67	267.769	905.344	799.134	2240.76	3347.81	581.519	1367.33	1127.13	262.413	168.034	76.2319	511.573	700.541	1058.47	1979.3	690.706	641.619	891.422	329.861	841.999	1249.23	1065.92	892.892	350.136	685.763	339.579	555.501	1170.01	1300.35	153.349	195.64	1039.12	850.856	181.45	1621.71	799.822	937.606	314.955	332.569	2052.91	584.224	1062.14	931.821	351.469	1171.85	518.025
Clostridium_sp._CAG:81	701.295	0.08	92.7605	37.0714	153.025	93.6874	576.883	583.086	334.454	29.2885	259.937	41.3385	1.9704	15.5148	173.962	270.405	4.0638	43.2931	173.833	10.0406	1.6489	90.2463	950.759	23.7348	404.937	3.5549	5.7007	73.0473	16.8317	143.592	37.0641	3.3558	8.6212	142.385	10.6674	18.2693	0.0621	27.3341	11.5374	11.156	3.5525	14.5246	42.9816	777.224	36.6693	21.4114	6.3976	103.653	507.48
Klebsiella_oxytoca	48.7942	28.0489	18.5218	7.1808	14.3375	0	49.5533	29.0178	0.7468	218.085	9.4492	142.292	369.67	504.088	1.0217	60.1437	435.799	204.323	123.329	79.8718	19.2448	115.407	136.505	40.1255	144.229	62.1212	191.759	798.148	1464.93	168.417	29.3483	669.217	192.364	363.081	23.2628	147.439	763.767	1.8312	1.0938	235.939	308.432	4.2152	3.1644	128.56	48.2505	2.4327	19.5413	20.0019	102.939
Citrobacter_sp._SNU_WT2	0.4871	0.6226	0	0.0877	0	0	0.7913	0.3026	0	3.7883	0	3.4749	7.0124	5.8913	0	0.531	30.8762	3.7996	0.7815	0.1523	0	1.6993	2.3114	1.0265	2.625	0.728	1.8826	0	0.2013	3.6482	0	1.5222	2.5267	4.0573	0.6201	0.1729	3.8369	0	0	2.02	5.194	0	0	0.9828	0.3655	0	0.11	0.52	2.1022
Olsenella_uli	0.166	0	0	0	0	0.1183	0	0	0	0	0	0.4779	0	0	0	0	0	0	0	0.3101	0.4445	0.5085	0.9802	0	0.1894	0	0.479	0	1.0243	0	0	0.2213	0	0	0.4208	0	0.8694	0	0.1791	1.1883	0	0	0	0	0.248	0	0	0	0.1259
Prevotella_copri	577.409	118.923	2158.92	892.295	3079.38	1530.34	735.649	189.709	65720.5	1270.72	1804.81	3841.06	239.421	15.6369	646.085	811.144	269.675	120.556	208.619	638.693	195.452	46.1957	118.743	1684.43	36.7683	4168.89	659.646	487.608	191.056	90.7007	1614.87	50.8024	23.4081	64.8321	766.524	92.4962	15.3591	3094.69	365.59	295.599	27.4228	7018.57	4930.9	152.109	124.193	1374.93	221.699	3908.8	343.175
Sarcina_sp._DSM_11001	0.1196	0.7444	0	0	0	0	0	0.4647	0	1.9241	3.2957	0.1313	0.1676	0	0	1.0193	0	0.389	2.5502	0.4678	0.9391	1.0549	0	1.8916	0.5716	0	0	0	0	1.5591	7.1166	0.167	0	0	0	2.1679	0	0.8198	1.2164	0.3985	0	2.2116	0	0	0.3742	28.1347	0.1689	0	0
Olsenella_sp._KCTC_15699	0.1175	0	0.3654	0	0	0	0	0	0	0	0	1.1152	0	0	0	0	0	0	0	0	0.0737	0.1053	0.3113	0	0.1111	0	1.0648	0.1004	0.2404	0	0	0	0.0348	0	0	0.0992	0	1.3253	0	0.3281	0	0	9.2158	0	0	0	0.0927	0	0.0521
TM7_phylum_sp._oral_taxon_488	0.9694	0.1166	0.3368	0	0.2289	0.1743	0.2531	0.7655	0.0485	0.494	3.7867	4.4025	0.0575	0.3629	0.8596	0.797	5.0547	1.6216	0.1474	0.1205	6.3186	0.9733	1.0029	26.7628	0.7468	1.3431	11.139	0.8805	4.3554	0.5414	6.9948	2.1505	0.8858	0.931	1.9446	1.8185	7.706	7.936	0.8736	9.7023	0	0	8.7037	1.0392	1.0377	0.6786	1.9581	0.5916	3.6767
Citrobacter_amalonaticus	0.3317	0.0508	0	0	0	0	0.1107	0	0	2.0257	0	0.5281	0	0.3788	0	0.1535	3.5418	0	0.0683	0.1927	0	0.1528	0.0673	0.0718	0.0651	0	0.119	0.0833	1.3266	0.0254	0.0853	0.626	0.5751	0.0789	0.1084	1.316	0.1532	0	0	0.1361	3.4389	0	0	1.371	2.0445	0	0	0	0.0566
Bacteroides_cellulosilyticus	321.43	5.9039	406.063	594.681	225.397	227.645	364.884	96.1597	1018.7	527.245	59.9195	30.5792	48.7313	2.038	302.289	169.607	12.2533	48.2109	151.561	500.038	13.2658	19.0954	73.4528	44.1484	16.7201	160.7	27.2802	383.018	59.8928	19.4589	99.8408	32.4582	7.1716	8.5377	63.6542	20.1843	7.2583	119.879	23.8211	108.301	22.4488	146.635	67.6739	23.692	100.456	281.338	52.5218	375.625	24.6562
Collinsella_sp._AM36-4AA	47.9906	17.0606	8.8491	18.6347	83.3063	3.2607	1316.83	2145.3	32.1516	98.8914	115.015	692.707	192.845	255.214	1.1125	29.1248	470.971	146.715	42.9622	46.4337	75.4552	115.987	85.7195	88.812	92.0766	162.512	423.498	164.833	926.69	197.877	210.375	552.7	203.031	202.569	39.8412	211.289	558.703	31.7104	96.22	164.513	226.069	6.1234	285.614	45.5126	80.7456	26.1569	354.593	5.9287	269.353
Roseburia_sp._AF15-21	24.3037	24.4114	12.1061	10.5036	96.9868	80.776	52.8866	53.7097	35.7139	199.946	37.1657	27.7451	4.0917	9.0536	27.2787	97.972	108.396	149.185	83.8971	31.7468	148.406	38.8628	60.9082	42.0473	80.102	138.528	219.41	17.6827	74.2365	48.4159	26.2479	132.929	19.1812	43.5013	140.873	95.3887	10.4792	179.01	61.8887	267.409	70.3068	10.7837	111.025	29.6482	218.839	384.058	171.325	131.033	15.0092
Lachnoclostridium_sp._An196	71.5405	13.3626	5.5869	1.3226	11.7624	9.2455	10.1053	9.2698	17.3049	4.9951	18.4861	3.6497	1.681	0.3438	3.9478	8.4831	0.8074	13.5086	3.4843	4.9296	8.9569	10.391	14.1901	12.6788	9.3418	6.0192	0.9981	15.4837	6.513	92.1791	4.2269	12.7764	6.8697	11.519	6.3555	11.8296	0.2616	10.8309	4.1379	36.8104	3.6192	6.4012	25.574	2.6733	49.8634	4.8103	7.5058	12.0712	10.7327
Pseudomonas_weihenstephanensis	1.407	0	0.1686	0	0	0	0	0	0	0.2105	0	0.0788	0	0.0224	0	0.048	0.5219	0	0.0434	0.0888	0	0	0	0	0	0	0	0	0	0	0.0271	0.1206	0.0149	0	0	0.1602	0	0.0643	0	0.0288	0.4374	0.1156	0.3154	0.0588	0.1713	0	0.0397	0	0.0205
Lactobacillus_unclassified	1.3581	24.6607	0.0573	0	0	0	0.427	0.226	0.0373	0.3425	0	5.469	0.0955	0	0	0.2089	7.0675	0.5558	0.056	0.4172	0.2148	0.0434	2.1623	1.0329	1.1668	0	0.3039	0.1146	1.4988	0.0978	0	1.0652	0.7358	0.5114	0.1393	0	0.1892	1.1156	0.2775	0.3988	5.1305	0	0.4532	10.6434	1.5502	0	0.6808	0.1917	0.21
Gemmiger_sp._An50	21.8999	0.6284	1.654	0.053	0	0.0703	0.1578	0	0.3937	3.1219	14.0489	0.7276	0.0362	0.0995	0	0.1564	0.3422	0	1.1406	3.3579	0	0	0.06	0.7395	0	1.2793	0	3.4862	0	0.1808	13.8191	0	0	0	0.0312	3.0866	0	1.0206	46.7776	0	0.1534	0	3.6723	0.3395	5.5339	0.8315	3.4146	7.6534	0
Butyrivibrio_unclassified	12.1563	0	0	0	0	0	0	0	0	0	0	0.6202	0	0	0	0	0	0	1.1456	0	0	0	1.5059	0	0	0	0	0	0	0	0	0	0	0	0	0	0	0	0	0	0	0	0	0	0	0	0	0	0
Eubacterium_ruminantium	3.4955	0	0.4778	0.1933	1.1378	0	0.8724	0	0	0	0.5258	1.0096	0	0	1.869	0.4391	0	0	0.3231	0.6718	0	0.5098	5.7341	0	5.4372	1.9416	0.6227	0	3.4036	0	0	0.5844	0	2.2173	4.4371	0.3162	0.1107	0	0.2365	0.143	0	0.5604	5.5826	1.0924	0.403	0	0.2956	0.1911	0.9297
Firmicutes_bacterium_CAG:170	6.8561	5.4053	37.6717	3.4272	22.3577	27.139	41.7125	48.7747	16.1249	100.422	24.8623	3.0632	3.0847	8.1275	19.8336	11.1587	7.4812	22.9251	13.6952	18.9177	15.6035	7.9084	35.0272	7.6501	18.3782	23.0996	17.1776	22.406	6.6581	14.3915	13.8089	23.2659	0.8977	5.8921	10.6466	21.3132	2.8706	47.5678	7.6126	23.6625	4.311	6.6449	57.5725	30.2344	18.4526	21.9592	7.6134	42.8623	14.0658
Flavonifractor_sp._An306	3.5054	0.9864	20.8454	6.5574	2.557	0.7878	10.1501	4.0458	12.1464	7.9516	6.2927	1.0896	0.7614	0.4662	6.4882	1.5355	2.7899	3.5189	2.7655	36.9574	2.8256	0.0721	5.7445	8.7022	3.123	1.1808	0.8122	1.5859	0.69	1.3942	15.7764	6.6381	0	5.717	1.7708	2.7057	0.1779	7.4226	2.5618	0.3707	0.1793	1.1288	27.1343	4.9658	4.4066	15.3941	10.2669	46.9156	3.4021
Bacteroides_sp._OM05-10AA	0.2125	0	2.2588	14.1662	2.052	5.7568	3.7118	1.183	3.3945	7.3464	0.6214	0.979	4.0611	0	21.5966	4.6705	0	0	1.0183	27.3902	0.2277	0	0	3.21	0	0.5421	0	6.2063	0	0	2.8603	1.7002	0	0.1274	1.3467	0.9197	0	2.3187	0.4587	0	0.5513	1.7661	0	0	0	40.2026	0	8.1303	0.9668
Enterobacter_sp._ku-bf2	0.0442	0.2626	0	0	0	0	0.2143	0	0	0.1697	0	0	0.1786	0.5136	0	0.036	0.0871	0.0686	0.1058	0	0.4023	0.0169	0.0783	0	0.0756	0.0282	0	2.8383	0.2726	0.275	0.033	1.2664	0.1454	32.2413	0.14	0.5736	0.0257	0	0	0	0.3008	0	0	0	0.033	0	0.0298	0	0.0167
Cyclobacteriaceae_bacterium	10.5199	0	11.2791	19.0486	9.2665	12.6298	5.0143	0	2.3583	4.2532	1.0793	0	1.7634	0	0.9743	5.4079	0	0.5733	0	0	0	0	0	6.5045	0.2106	2.1183	0	1.6169	0	0	1.9319	0	0	0.2213	0	0	0	0.4027	0.5975	0	0	19.5554	3.8197	3.2508	0	5.0598	0	4.707	4.058
Citrobacter_portucalensis	41.1362	36.6704	5.09	21.415	4.1664	7.6217	44.9286	26.6456	12.5583	655.692	13.6663	102.304	303.163	301.28	3.4629	86.209	1766.22	128.679	75.7114	112.724	13.4299	136.976	156.276	25.7871	123.997	98.221	177.028	166.09	878.348	269.391	11.9646	404.766	290.304	266.615	65.1764	854.586	519.4	13.7173	0.4017	380.012	344.949	11.8841	0.7664	122.534	102.604	12.7342	17.6081	11.971	102.462
Leptospira_wolffii	11.6888	0	0	0	0	0	0	0	0	0	0	0	0	0	0	0	0	0	0	0	0	0	0	0	0	0	0	0	0	0	0	0	0	0	0	0	0	0	0	0	0	0	0	0	0	0	0	0.368	0
Sutterella_parvirubra	0.3041	0.0401	0.1792	0.0725	0.1302	0.4154	0	0.2502	2.0929	0	0.1972	1.0562	0.2945	0.168	0.089	0.0771	0.133	0	0.0808	0.126	0.0722	0.1033	0.1593	0.1698	0	0	0.1557	0	0.3329	0.1199	0.1008	0.1263	0.1365	0	0.0346	15.604	12.6372	0	0	0.1073	0.0875	47.8694	1.1583	0	0	4.4427	0	0.3538	0.2045
Bacteroides_ndongoniae	102.268	0	121.563	1.9105	519.223	315.089	9.8646	2.5674	30.6091	65.6126	6.5146	0	9.6701	0.888	15.1014	5.9548	0.407	2.731	22.2811	74.886	0.1752	2.2151	0	17.854	0.0467	32.8638	5.1622	4.7846	0	1.3295	53.9663	0.3271	0	0.1401	19.8406	2.45	0.0952	41.5235	2.3608	6.7007	1.1144	117.256	17.7936	3.9048	6.9573	178.77	6.9291	11.456	14.8944
Parascardovia_denticolens	4.6419	0	0	0	0	0	0.1958	0.1872	8.0588	13.9529	0	0	0	0.0838	0.3995	0	59.4989	0	9.1864	0.377	0	0	0	0	0	0	0	0	3.7362	7.2682	0	0.4036	0	0	0	0.1456	0	0.2202	28.5325	0	0	0.1048	3.2819	0.1871	0	0	0	0	0
Bacteroides_eggerthii_CAG:109	2.0894	0	11.2574	3.3391	4.4936	138.218	5.9834	1.6647	21.2173	26.8386	0.5397	0	2.9887	0	8.3417	1.2142	0	0.8599	21.5673	35.734	0.2456	0	0	2.9196	0.3011	1.0943	0	15.6722	0	0.231	15.5478	0.2978	0	0.3656	3.1797	1.6329	0	18.0137	0.4186	0.2066	1.5131	24.7706	3.2878	0.4555	0.3727	27.1332	2.0085	12.3195	3.9372
Alistipes_finegoldii_CAG:68	12.2905	0	53.3157	7.9836	11.4332	50.3363	20.3351	6.0864	11.1199	52.7517	3.1363	0.9502	12.6132	0	102.151	22.229	0.8135	0.6407	28.3755	112.903	0	2.4488	0.5847	25.1324	0	10.2068	2.0952	34.0942	0	0.1467	52.7682	2.8603	0	0.3462	46.8306	4.4039	0	94.8392	0.5343	0	0.214	75.3182	2.9274	21.2395	4.1913	112.888	0.2225	30.6452	9.1808
Tannerella_sp._oral_taxon_808	0.0339	0	0	0	0	0	0	0	0	0	0	0	0	0	0	0	0.5345	0	0	0	0	0	0	0	0	0	2.8157	0	0	0	0	0	0	0	0	0	0	0	0	0	0.2637	0	0	0	0	0	0.0914	0	0.0514
Bacteroides_ovatus_CAG:22	20.9244	0	16.3145	152.368	36.4254	51.3143	29.4592	7.3795	35.0288	34.2367	1.8959	1.5179	32.9079	0.3977	119.124	29.0738	0.3877	0.7409	33.3262	318.081	0.7673	0.8796	2.0239	17.3099	1.4833	17.1043	1.0297	40.6521	0.6175	0.6029	26.3986	16.229	0	0.863	62.3334	7.4921	0.0281	22.8504	1.9711	0	2.1287	35.1275	12.4619	178.099	4.0045	222.833	2.7324	65.6815	9.4071
Fusobacterium_necrogenes	16.6268	0	0	0	7.6133	0	0	0	0.1883	0	2.2289	23.5469	0	0.3162	0	0	0.0867	0	0	0	0	0.067	0	0	0	0	0.3935	0.022	0	0	0.0658	0	0.0214	0	0.165	73.4296	0.0421	0	0	3.4705	0	147.704	16.7813	0	0	0	0	0	0.0548
Chromatiales_bacterium_(ex_Bugula_neritina_AB1)	0.1887	0	0	0	0.2429	0	0	0.9337	2.4111	1.3287	0	0	0	0	0	0	0	0	0	0	0	0	0	0	0	0	0	0	0	0	9.3119	6.2898	2.1332	2.2245	5.0222	7.894	6.9551	7.8234	5.2268	6.504	2.7738	0.1307	1.4877	0.1166	0.1879	0.3449	0.5089	1.2031	0.4292
Erysipelotrichaceae_bacterium_AF19-24AC	0.1411	0.0164	2.7696	1	0.834	4.7064	3.3075	2.5083	0.578	4.0959	7.9816	0.8716	0.0616	0.6244	0.2857	0.661	1.232	0.582	1.4104	0.2612	1.097	0.0775	9.8722	0.1739	0.7166	0.5077	0.1049	0.0752	0.5267	0.0737	0.8164	0.3029	0.1176	53.7289	1.5325	0.1533	10.1113	2.7329	0.8831	2.9113	5.2767	0.5354	5.9494	0.0555	5.7705	1.5447	0.3124	1.9892	13.094
Veillonella_denticariosi	0.1853	0	0	0	0	0.3603	0	0.4689	0	0	0	0	0	0	0	0	0	0.7322	0	1.1801	0	7.661	0.2985	0	0	0	0	0	0	0	0	0.1685	4.6522	2.4239	1.1211	2.0052	0	0	0	1.3397	0	0.8571	0	0	0.1761	0	0	0	0.1916
Prevotella_sp._CAG:755	1.279	0	0	5.6012	1.5478	0.2857	0	0	6.401	1.2037	0.5859	0.2308	0	0	1.5867	0.3262	0.2679	0	0.5508	1.5931	0.5431	0	0	1.1382	0	0.7666	0.4626	12.3259	0	0.1782	0	0	0	0	0.7619	0	0.0128	0	0	0	0	3.9549	2.4685	0.3715	1.1975	126.22	0	3.3403	0
Parabacteroides_sp._An277	0.9895	0	19.3215	6.0214	0.1609	0.7773	19.6216	5.7937	0.1583	20.8451	0	0	0.055	0.0412	3.0089	0	0	0	0.2084	0.3723	0	0	0	0.1248	0	5.2463	0	1.0132	0	0.6611	2.2866	0	0	0	0	0	0	34.8254	0.2674	0	0.0055	173.779	13.4738	0	2.4437	0.2794	10.3387	0.0359	0.4885
Streptococcus_sp._GMD4S	0.0447	0.1062	0	0	0	0.3821	0	0	0	0	0	5.7618	0	0	0.2358	0.0727	0.7047	0	0	0	0	0.2052	0.422	0.2249	0.2039	0	0.2062	0	0	0	0.4008	0.7147	0	0	0	0.6444	0	0	0	0.9949	0.0579	0	2.9056	0.3313	0.8009	0	0.241	0	0.2032
Haemophilus_sp._CCUG_60358	0.2876	0.0803	0	0	1.2978	0.0519	0.1412	0	0	10.4787	0	0.5276	0	0	0	0.5827	0.5943	3.1455	0	0.4686	0.0835	1.7089	0.5522	0.2214	1.0372	0	0	0.1138	0.1241	0	0	109.834	0.0092	0.762	0.0867	0.1124	0	0	11.1892	0.0962	0.0855	0.4366	6.2402	0.0891	0	0	0.1711	1.1649	0.6635
Ruminococcus_sp._AF25-28AC	18.5761	10.2409	11.998	8.6566	11.0045	31.0489	39.2421	36.8722	5.2108	52.5517	16.6348	30.6383	2.9748	3.5343	117.324	15.4028	47.1143	22.8429	7.6929	22.6737	33.2836	19.3443	50.6882	123.578	38.2252	11.25	48.6528	22.4916	68.7211	48.6351	47.9819	19.5951	22.4601	8.4809	27.8892	20.724	1.0086	92.8306	113.9	49.9475	19.6777	3.1696	80.2017	14.8563	44.3396	4.1731	113.677	8.8044	48.4291
uncultured_bacterium_Contigcl_1787	5.9547	0.3146	21.7995	3.9834	6.6439	10.5645	24.6523	13.7494	72.706	118.929	43.3349	0.3048	4.0846	0	2.7942	4.3082	23.4849	65.3526	24.7267	19.7731	9.0721	6.4853	5.0008	21.3192	29.8942	17.5506	0.9164	24.3449	1.3065	4.0007	43.5335	16.5846	1.2057	1.745	3.0187	38.1772	0.308	66.4123	10.2821	2.9471	1.0298	93.7472	334.897	3.6802	8.6989	21.0412	12.8482	39.9356	0.2007
Coprobacillus_sp._AM28-15LB	7.6187	0	18.7545	109.737	187.763	32.0083	0	0	145.329	1.3468	3.076	1.0682	1.8106	1.1647	2.4482	4.8521	0	0	2.83	100.38	0	3.8288	0	3.7873	0	1.8232	7.6903	17.9206	2.2337	0	2.6488	0	0	0.8137	5.3669	0.5058	0.5267	4.5911	0	0.3599	5.9494	46.6728	0.6689	2.4853	4.5562	14.4205	2.1966	3.7264	1.8611
Cedecea_davisae	0.3393	0.6388	0	0	0	0	1.3171	1.2593	0	16.6183	0	0.521	3.6996	4.5556	0	2.2557	39.7055	4.7433	0.4065	1.0565	0.4241	1.5159	3.3397	0.4272	2.0004	1.0098	4.3087	8.7539	53.4692	5.5825	0.4229	25.715	3.1778	3.7633	0.7885	28.8007	28.1101	0.2468	0	33.7407	10.9672	0.3526	0	4.1422	5.9151	0	0.305	0	1.5867
Clostridium_sp._C105KSO13	2.0428	0.2076	0	0	0	0	0	0.1054	0	0	0	0	0	0	0	0.1747	0	0.0882	0	3.0833	0	9.9777	6.9303	3.8661	0	0	0.1311	0.3135	0	0.1515	0.087	0	4.9064	0	6.9838	1.5677	0	3.8297	0.516	6.3521	12.6826	0.059	1.0996	0	0.9345	1.6023	0.193	0	9.3984
Sulfurimonas_sp._SN118	0.0788	0	2.722	1.6944	2.7391	9.3245	1.0705	0.2924	4.2793	7.8692	0.9216	0.2723	0.6371	0	4.0559	0.3848	0	0.8567	9.2502	16.7793	0.1688	0.1207	0	3.3723	0.1798	0	0	4.0271	0	0.0701	3.5352	0.8405	0	0	3.2957	0.341	0	10.661	0.3402	0	0.2555	7.6128	0.233	0	0.1177	28.949	0.3188	8.7089	0.7767
Mycoplasma_sp._CAG:877	0.1594	0.2526	0.5647	0.1142	0.6156	0	0	0	0.3394	0	1.5535	0	0	0	2.8048	3.0272	0	1.6503	2.2911	0	0.4553	0	0.8785	0.2675	1.2124	0.5421	0.2453	0	0.5246	0.0945	2.3835	0	0	0	0	2.146	0	0.2319	0.1147	0	0	0.2208	0.6283	0.197	1.4288	0	0	1.8067	0
Hungatella_hathewayi	1580.67	1391.64	2353.69	1139.39	2349.93	1973.09	2701.64	2756.48	1759.25	3075.24	2306.99	1749.63	321.865	455.383	2037.33	2013.66	457.891	2322.14	1833.08	1951.3	1618.88	1556.21	1850.3	1819.15	1869.82	1510.67	1758.32	8311.49	1260.9	2280.55	10353.6	2419.23	934.556	1873.89	5346.91	2066.42	1449.41	2496.73	1836.9	4464.9	1044.52	1677.28	3051.55	2937.59	3941.95	2562.9	797.47	2821.82	1416.45
Clostridiaceae_bacterium_AF02-42	255.223	21.9023	80.8632	23.4232	185.818	47.6077	401.347	472.478	165.771	143.805	173.924	34.6436	8.9875	8.3095	105.993	170.942	59.5128	209.244	103.136	129.382	57.3514	176.774	418.588	58.6555	230.481	62.0893	19.1389	43.3728	98.5335	95.9799	142.419	101.828	17.7334	60.4158	69.9639	63.2864	4.5356	174.822	58.1861	140.693	17.6586	24.5225	182.522	315.246	186.261	82.6573	20.1774	109.471	107.817
Clostridium_sp._AM22-16AC	240.091	27.8871	60.6417	24.9715	83.4954	41.1514	269.678	256.25	176.107	260.744	187.944	46.062	9.4202	7.1561	83.1559	77.7669	12.5042	97.2731	79.7001	111.222	31.8573	50.3467	250.33	30.1065	157.515	42.5193	35.0265	63.3604	193.534	95.8683	83.4129	58.4078	10.9652	51.0105	85.8996	66.473	6.9379	120.881	90.4873	79.0146	21.0675	40.9884	109.668	224.588	102.448	68.422	20.6257	180.769	637
Senegalimassilia_sp._KGMB04484	10.6308	6.0258	24.1975	7.7318	25.7457	8.0435	51.7723	49.1497	22.1818	69.341	25.0326	9.776	4.3218	6.9191	13.013	19.8214	59.1668	15.1349	38.1463	34.4236	30.4517	39.6832	10.0503	18.2839	15.6815	18.7211	10.5442	4.2583	5.9964	20.3314	51.9179	8.0208	0.865	1.9147	2.6749	5.0499	3.155	115.677	31.4189	77.0501	2.9773	4.8505	273.598	12.7459	17.4874	9.3781	24.9083	48.6973	41.501
Corynebacterium_diphtheriae	0.3073	0	0	0	0.1396	0.0515	0	0.1342	0	0	0.8456	1.3739	0	0	0.1908	0	0	0.2246	0	0	2.2074	0.2215	0	0.546	0	0	1.5439	0	0.8923	0	0.1081	0	0	0.0433	0.3665	0	0.2945	0	1.5606	0.4601	0.1876	0.0376	0.2138	0.2011	0.216	0	0	0	1.0416
Oscillibacter_sp._KLE_1745	0.8344	0	10.004	1.8634	2.0749	2.0748	0.4764	0	6.401	1.1742	0	0	0.2683	0	0.3378	0.7639	0	0	0.0757	0.2538	0	0.0399	0	1.1852	0	0.3204	0	6.9683	0	0	0.5268	0	0	0.1563	0.835	0.2803	0	0.3999	0	0	0.0338	2.7295	1.6722	0.2417	0.2337	2.2654	0.1342	3.5423	0.8976
Bacteroides_sp._AM23-12	0.0981	0	0	0.8389	2.8033	1.0865	0.6338	0.2357	1.2752	0.7666	0.955	0.5433	1.4003	0	1.0297	0.9157	0	0	1.0216	7.6259	0	0	0	8.1309	0.0207	0.5554	0.0209	1.4572	0	0	0.2171	0.75	0	0	2.5757	0.1571	0	1.3067	0.1371	0	0.0588	1.1687	0	0	0	5.7209	0	7.2889	0
Clostridium_sp._AM25-23AC	6217.95	38.4552	617.141	255.24	1140.89	680.562	3608.57	3754.36	2651.16	457.982	2168.72	597.64	52.5621	110.34	1042.16	2343.03	134.167	491.97	1019.25	273.035	255.765	658.491	5519.75	301.581	2864	318.155	1058.33	940.491	579.927	1426.41	398.52	273.951	71.9209	1176.48	116.169	299.618	12.9063	710.745	258.326	982.179	87.4205	179.321	942.059	5687.72	673.555	249.366	201.21	1018.89	2780.83
Blautia_wexlerae	234.518	626.941	351.334	111.693	278.572	366.835	641.113	796.526	140.862	504.446	355.218	177.777	70.5269	223.163	873.444	234.44	415.201	539.591	169.899	435.248	464.902	208.008	585.574	936.142	410.35	237.431	219.326	233.656	286.07	434.692	431.286	356.345	296.531	148.877	370.278	305.685	108.909	1269.02	889.522	646.275	186.942	97.0656	1001.32	324.512	444.877	224.157	977.296	371.679	468.513
Alistipes_finegoldii	32.1857	0.4743	122.641	48.8523	43.207	43.785	76.3997	20.2546	248.346	67.2399	16.6352	30.1427	27.7617	0	227.981	39.2876	5.593	14.6936	48.0362	265.287	1.4658	1.6131	1.066	18.0723	1.5059	29.3126	5.3421	28.0401	1.562	2.5772	130.245	1.591	0.1044	0.996	37.482	11.0386	0.291	260.362	24.4874	1.8508	0.5242	124.484	29.0552	1.4509	7.433	125.718	1.7535	82.8752	13.3619
Bacilliculturomica_massiliensis	13.1027	6.5734	0	0.6333	0	0.3888	1.1542	1.4714	0	0	1.3043	0	0.2186	0.4527	0	0.8472	0	0	1.6155	0.0926	0	0	0	0.2495	0	1.201	0	0.2895	0	0	0	0	0	0	1.3191	0	0	0	0.3209	0	0.2392	0.2059	0	0	3.3669	0	1.0026	2.5224	2.6681
bacterium_0.1xD8-82	19.0562	0.532	4.0825	0	3.5433	0.2127	1.2442	2.1079	0.8038	3.6066	5.4464	1.7694	0	0	3.0272	2.2088	0.5827	0.4635	0.8494	2.0713	0.6217	2.0252	0.8095	0.7576	1.4032	0	1.8601	0	0	6.1457	0.434	3.2203	2.1398	0.5632	2.0913	6.3757	0	12.793	2.1002	0.7121	0	0.1005	3.6707	0.4175	9.1405	0.8421	0.2012	1.1724	0.8107
Salmonella_virus_VSiP	0.5954	0.3403	0.7606	0.8586	0.4367	0.8162	0.6443	2.1136	0	0.5497	2.2931	4.0184	0.4818	0.2757	0	0.466	0.982	0.7734	0	1.8714	0.5089	0.1271	0.8452	2.601	1.032	0.4709	1.8006	0.5726	1.1163	0.5497	0.4965	1.0151	0.2898	0	0.6311	1.5443	2.7187	0.3622	0	1.3796	0.3713	0	0.4908	0.8809	0.248	0	0.579	1.2168	1.6232
Prevotella_sp._C561	0.2109	0	85.1888	37.4169	24.0318	32.9277	35.6114	10.5668	23.9196	14.5824	0	1.2146	7.1309	0.0876	23.1044	9.7857	0.6239	0.819	31.0764	62.051	1.4687	0.8076	0.1246	4.5133	0.2407	17.0812	4.6258	34.1857	0	1.5005	13.2475	2.2498	0.0534	0	24.3264	3.1948	0	42.5742	0.9105	5.201	0.2052	57.9541	16.8378	0	8.8237	43.9482	1.7066	18.6039	13.1136
Phytobacter_ursingii	0.0347	0.0825	0.5535	0	0	0	5.3901	3.8652	0	47.7396	0.8121	0.9596	30.008	141.727	0	5.9344	151.719	27.6077	7.4026	0.1297	0	2.1802	29.9321	4.0204	2.9314	0	4.8891	1.6222	4.9705	14.2015	3.1151	11.4803	0.5624	34.1727	1.7601	1.7029	0.1616	0.303	0.7494	9.1686	1.0357	0	0	1.3518	6.9509	0	1.1237	0.2952	9.2133
Cronobacter_dublinensis	8.6795	2.8411	0	0.6155	0	0	9.1083	8.8289	0	17.0521	3.9324	25.4714	86.226	75.9245	0	4.5016	59.6868	24.2923	28.3432	14.8096	2.3374	33.1669	23.3329	2.1618	16.4415	26.7186	45.9834	50.2197	210.654	52.4696	4.3857	128.299	59.3014	58.6611	9.9392	35.2321	131.723	0	0	28.5775	67.5851	0	0	12.7681	18.5597	2.2952	2.6148	4.6376	28.4606
Butyricicoccus_sp._GAM44	27.6719	18.2586	137.332	15.9573	99.5947	45.875	180.611	220.613	76.7286	124.349	73.4962	51.7614	15.4235	1.7852	41.6855	52.6164	29.4728	130.778	65.9701	170.639	121.147	51.2535	31.9586	82.8463	54.4499	47.4807	7.6359	11.2486	63.0598	31.7008	80.9566	63.1122	3.2226	2.5703	50.0726	94.7427	0.317	256.924	22.8012	57.1518	21.5592	16.2575	126.967	35.9409	99.531	49.3095	17.3517	162.786	38.4041
Clostridia_bacterium_UC5.1-2H11	54.8057	535.26	76.0443	210.384	159.351	43.5282	40.1638	17.5992	120.208	24.1093	89.4757	3.9912	4.5648	0.3359	400.405	6.1449	1.712	1.6971	11.3279	82.3708	21.6092	1.6095	0.6276	252.038	0.4344	42.057	3.0439	12.7757	1.557	0.8777	64.8906	10.6574	0.0651	0.7341	544.944	1.4099	13.521	26.6264	16.4418	0.7458	4.4765	71.9076	34.4105	32.5761	21.3043	42.5744	38.9533	91.2303	264.787
Subdoligranulum_sp._TF05-17AC	22.3896	2.3469	24.9207	1.3959	8.6906	26.4717	36.4082	66.0986	7.1384	27.3248	173.377	8.9334	9.7729	6.2666	91.2649	15.4262	80.1318	3.0743	23.1099	86.086	2.0774	0.0762	20.5266	81.8827	7.1802	42.019	3.5901	39.6571	1.7665	4.9683	38.8782	4.4538	1.1309	0.0511	150.916	52.9678	11.8862	72.5352	29.5325	3.2942	7.9615	2.8905	320.97	161.805	59.0187	23.7667	104.508	74.0196	4.3662
Ruminococcus_sp._OM02-16LB	4.6239	8.1946	9.3934	5.9441	3.7914	9.3678	15.6316	15.8327	1.8057	30.5604	10.6177	7.6716	1.9729	0.5296	107.821	1.3006	51.453	14.3919	13.8673	13.4592	21.0423	8.7545	19.1726	97.6761	14.8024	18.1462	6.7364	16.5638	16.2366	16.82	17.4281	9.3927	22.8788	3.6651	15.7234	25.2604	0.0328	86.6056	74.0292	28.9332	13.8891	2.0128	61.6132	8.8415	11.8534	2.5165	91.8819	5.3336	23.4067
Bacteroides_finegoldii_CAG:203	4.324	2.0369	8.2345	60.4545	21.501	20.8841	13.7143	3.0978	26.6549	29.6498	1.3367	10.4005	32.5462	7.1527	109.281	12.2272	30.3522	3.3628	40.6386	207.355	0.4275	5.325	1.5539	18.4578	2.6796	11.5357	4.7034	19.695	2.0942	5.6953	22.9038	3.9623	1.8887	5.2451	28.473	5.6567	3.931	27.8898	4.7295	0.7247	8.423	6.9029	2.3667	74.8146	6.1736	120.401	0.3286	43.9024	5.5169
Butyrivibrio_sp._NC3005	1.8404	8.2445	0	0	0.5521	0	0.0369	0.1059	0	0.0365	0.651	0	0	0	0.1469	0	0.3459	0	0	0.0355	0.0452	0	0	0	0.8055	0	0	0	0	1.6938	0.3154	0	0.0919	0	0.4681	0	0	0	0	0.3542	0	3.2379	0	0	0	0	0	0.1749	0
Sporobacter_termitidis	0.8427	0	0	0.2928	0.1856	0	1.0323	2.7852	0	0	1.1461	0.1568	0.1117	0.3487	0	0.4558	0	0	0	0.2092	0	0.0429	0	0	0	3.6242	0	0.0818	0	0	0	0	0	0	1.7807	0.7848	0.0978	0	0.3928	0	0.3141	0.4905	0	0.2707	3.6479	0	1.4631	2.7386	4.3961
Pasteurellaceae_unclassified	0.3633	0.0798	0	0	2.4476	0	0	0	0	10.3497	0	0.4547	0	0	0	1.8535	1.9935	3.6912	0	0	0	3.9868	0.4989	0	2.7248	0	0.0775	0.8303	0	0	0	166.646	0	1.1431	0.1701	0	0.0781	0	18.6763	0.4523	0	0.8121	8.6951	0.1244	0.4657	0	0.181	2.7689	0.0509
Prevotella_sp._P3-122	4.5512	2.4834	3.5684	5.7754	1.7289	15.317	0.8687	0	3.3367	4.585	0	0.1718	1.316	0	1.7724	0	0.2943	0	1.7874	3.0659	0	0	0	3.0051	0.681	0.9515	0.1722	5.2291	0	0	4.4628	0.199	0	0	7.9429	0.4305	0	0.9768	1.1273	1.8991	0.1935	4.3402	7.5001	0	0	15.1364	1.811	4.1228	0.4525
Bacteroides_xylanisolvens	1893.06	489.943	6445.57	12477.2	2849.98	5505.51	3148.5	1642.06	4175.71	4316.6	2705.13	1426.92	3587.79	470.124	20167.7	1965.76	1014.15	1082.38	4500.45	15103.9	1397.77	869.912	1282.95	1755.65	1263.94	1485.4	1459.9	3450.35	4723.45	1130.99	2984.15	4219.76	458.566	1311.79	2579.33	3750.58	1984.59	2601.62	575.098	1127.9	728.423	3571.84	2668.35	6087.57	1053.28	23842.5	478.092	7361.37	613.505
Pseudomonas_unclassified	29.2597	29.2546	158.246	14.8055	110.318	196.971	317.062	514.679	85.1598	268.337	154.844	31.7107	24.3515	46.1297	70.7123	130.922	211.274	327.374	67.6634	107.484	178.955	19.9909	92.1149	86.4205	313.868	247.964	7.3019	105.753	10.9218	45.0245	137.692	275.285	18.0059	5.0836	313.228	57.6674	3.2761	269.269	254.676	82.1771	24.9068	40.1866	459.474	98.1875	122.443	70.679	176.523	151.969	114.315
Clostridium_sp._AM30-24	361.492	22.6566	278.825	60.4334	199.076	87.7112	564.211	546.614	218.101	513.394	329.45	83.0444	30.4649	23.7147	148.918	212.489	155.473	242.329	265.513	264.702	110.146	149.319	486.944	200.3	251.023	112.604	75.5556	72.4037	114.366	228.916	191.255	122.783	12.436	101.76	32.5114	127.105	12.5781	355.444	64.0322	323.607	25.9201	79.2303	294.467	534.832	202.138	126.459	101.264	260.455	414.345
Alistipes_sp._AF48-12	0.0105	0	0.3363	0	0	0	0	0	0	0.8911	1.6652	0	0.031	0	0	0	0.2496	0	0.5558	0	0	0	0	0	0	0	0	0.1232	0	0	0	0	0	0.0253	0	0	0	9.4814	0	0	0	0	0.1247	0	0.1261	3.8744	0	1.6138	0.032
Bacteroides_sp._AF25-38AC	0.1636	0.0649	5.0934	15.8612	3.0417	2.0975	12.9344	2.4904	1.7153	39.6537	0.3654	0	3.2405	0	13.9832	2.6901	1.0894	0.3999	46.2398	43.0591	0	0.1672	0.0645	15.1469	0	1.6783	0.3649	24.484	0	0.1667	1.7752	0.125	0	0.0375	4.3601	5.6848	0.0364	56.2733	2.832	0	0.1013	10.8375	0.4385	0.0718	0.6175	157.758	0.4916	16.2815	0.1361
Bacteroides_sp._NMBE5	212.193	0.5052	281.944	427.928	142.541	181.972	81.7305	16.9622	201.708	169.614	12.3255	0.1263	32.4127	0.1542	87.2523	90.2187	3.7063	2.5792	18.6252	42.9668	0.2566	1.26	3.3511	83.9522	0.5891	31.2512	2.8056	161.446	0.6273	1.2771	21.0854	40.8069	0.0133	5.4074	35.5744	15.0787	0.036	56.5656	3.5696	0.9764	2.8809	315.038	19.2061	41.1089	6.4042	211.752	0.4046	91.6597	138.648
Ruminococcus_sp._AM40-10AC	33.097	12.1284	13.5032	17.6057	17.6389	20.1322	50.7519	62.0781	8.8892	41.1777	42.1095	6.7	4.0226	2.8942	101.628	13.7005	45.2911	68.6357	12.3191	28.8876	38.8885	19.4836	64.4893	104.231	31.823	27.7378	19.8578	47.6471	19.9143	38.3049	40.4879	59.8936	21.1416	8.4934	34.7792	26.1204	0	112.598	85.6667	44.069	26.2574	13.6669	94.4413	23.5465	38.2738	9.6947	87.576	16.9195	36.3805
Clostridiales_bacterium_AF36-10	38.8902	0	3.2019	1.9285	11.2498	5.0862	32.7582	31.3757	21.214	1.3739	17.2806	1.5472	0.1273	0.6366	8.2733	18.0232	0.1366	2.6582	10.8749	0.3881	0.113	3.7925	50.5444	1.49	22.4841	0.1345	0.7686	5.2909	2.0754	9.1098	1.8566	0.1406	0.1944	9.8141	0	0.4542	0	1.791	0.8876	0.3593	0	0.986	1.131	49.5262	2.5122	1.1565	0.0711	8.4443	45.8609
Hafnia_paralvei	10.5151	1.47	0.0601	0.2794	0	0.0426	2.1779	1.6226	0	15.4388	3.444	4.804	23.0817	22.4111	0	4.8843	19.3177	9.0849	7.7475	5.8907	0.533	10.4668	5.5776	2.0636	9.5669	5.5486	16.7245	3.7383	12.9418	12.228	0.0677	19.9176	20.1631	16.3388	2.7131	1.1865	11.4432	0.9389	0	2.5467	29.712	0.2253	0.162	10.4143	101.888	0	0.7507	1.1926	7.5099
Anaerosporobacter_mobilis	26.603	0.4528	1.6996	0	3.0065	0	1.9102	0.4566	2.1404	1.7983	0.7758	9.6542	0.025	0.5575	0.7706	12.3863	0.7424	0.0616	0.7316	0	0.3073	0.1077	18.1631	0	0.1203	0.1952	1.0836	3.0667	0.1847	0	1.7334	10.403	0	0	0	0.0491	0	1.4381	0.9105	37.2177	0.0257	0	3.5632	0.2312	0.749	0.0466	0.237	0.8219	0.0791
Streptococcus_thermophilus	79.0763	15.2202	22.5352	40.0337	18.2988	15.3646	16.0292	10.2326	19.1383	24.7357	144.883	458.153	4.8585	4.3717	47.2964	19.0103	177.717	159.803	20.4701	337.065	20.1943	52.6705	250.706	752.558	70.6119	11.5887	116.364	37.115	65.2663	0.9289	332.292	560.654	9.0377	2.3132	12.4794	206.209	13.1899	46.3628	144.34	432.729	212.776	17.7875	464.009	95.4794	75.9579	36.3916	24373.7	194.246	161.918
Angelakisella_massiliensis	23.5034	20.2975	56.1633	12.1701	28.7932	19.6369	83.7549	81.597	28.6927	112.485	42.9963	15.1576	6.7179	6.3913	23.4302	32.3632	38.7975	50.6141	34.921	38.4976	42.316	10.8049	17.3383	39.0834	26.6059	28.553	38.8384	40.046	29.6404	11.8415	43.2761	77.2689	26.8946	41.0427	60.8385	33.2718	10.7043	80.3256	14.2037	211.401	12.4393	11.5614	77.3131	20.6298	60.621	111.821	25.8521	97.4169	25.238
Clostridium_sp._CAG:710	10.4217	5.2323	27.1661	2.2844	21.9607	30.9449	35.8217	30.7046	16.1722	25.4239	59.2116	67.1902	3.7787	20.6408	14.8091	7.2262	30.578	9.0149	16.6025	43.2049	19.8506	5.6413	8.4655	16.2753	35.9161	28.3728	9.3543	25.0855	6.7836	8.3105	80.7829	23.4936	0.9467	1.8342	53.982	38.8309	1.2698	74.3277	27.0774	13.1404	10.5604	4.5764	136.909	20.1813	44.1743	46.7014	15.7128	48.2874	24.268
Streptococcus_porcinus	0.1368	0	0	0	0	4.9993	0.1309	0.1251	0	0.259	0	8.9464	0	0	0	0	0.8109	0.1047	0	0	0	0.1053	0.812	0	0	0.43	0.4732	0	0.6789	0	4.6249	0	0.0348	0.4851	0.0855	0.0992	0.1601	0	0	0	0.0437	0	1.423	0.5712	0	0	0.1836	0	0.2066
Tepidibacter_thalassicus	1.9061	0	0	0.3129	0.4496	0	0.4518	0.7019	0.1859	0	0	0	0.0428	0	0	0	0	0	0.2091	0	0	0	0.1718	0	0.1992	0	0.0672	0	0	0	0	0	0	0	0.7376	0.084	0	0	0	0	0	0	0.7744	0	0	0	0.0785	0	0.0441
Leuconostoc_carnosum	0.1948	0.5053	0	0.1142	0	0	0	0.3293	0	0	1.6592	27.1851	0.7169	0.3835	1.1472	4.803	0.2808	4.8161	0.3819	0	0.4553	0.2848	5.4205	5.6165	1.8599	0	0.7359	0.0776	3.1582	0.1417	0.3194	5.8841	0.2335	0.2128	0.4942	2.0954	0	2.4765	1.2478	0.3381	3.3735	0	0.1571	0.394	5.2741	0	0.9309	3.3122	0.0806
Flavobacterium_subsaxonicum	0.1113	0	0.8874	0.1197	0	0	0	1.2393	6.7566	2.3516	0	0	0	0	0	0	0	0	0	0	0	0	0	0	0	0	0	0	0	0	1.1653	1.039	0	0.3336	0.7054	0.6423	0.7774	1.9433	1.0812	1.5938	0.1444	0	1.3165	0.1032	0	0	0	0	0.0844
Veillonella_seminalis	13.6494	5430.3	90.4347	0.7158	0.2861	0.3703	2.5735	2.9327	0.1757	0	2.2785	10.994	0	11.6864	0.0157	3.4348	1.4479	0.0424	3.1114	28.079	0	0.2892	4.052	168.334	1.7782	0.7233	2.0987	1.9238	0	0.0298	62.8488	0.0888	0.5703	0.1559	0.1231	25.9057	0	4.5764	0.1073	19.9477	0.0407	0.4846	3.5978	11.8861	5.5383	2.4107	6.592	2.2732	0.5072
Firmicutes_bacterium_CAG:41	17.433	449.406	23.1506	35.9646	38.0605	9.7902	19.3214	22.0888	25.248	30.1237	8.3569	5.516	24.0735	31.3544	334.585	68.5411	10.2173	378.756	117.716	60.1372	60.1255	0.6621	146.378	163.2	116.24	72.468	7.662	10.6555	5.5338	63.3017	54.5122	87.697	6.8099	5.2889	7.5164	77.5534	0.1875	26.4999	57.0135	2.1435	0.3328	26.4952	13.1805	294.807	248.248	354.593	112.11	177.521	65.1084
Bacteroides_barnesiae	58.0529	0	410.778	292.329	46.4078	168.226	131.818	23.3303	122.176	149.489	2.6027	0.0096	16.0252	0.4754	46.837	34.1684	2.465	3.0017	46.1522	160.305	0.2385	2.4644	0	32.3238	0.2462	37.4253	4.5846	90.5041	0	1.4119	30.8679	5.0192	0	1.0677	55.3074	6.2877	0	61.7046	2.136	0.5718	2.1943	119.464	19.9553	23.6798	9.8179	187.057	6.3427	79.9135	12.735
Faecalibacterium_sp._AF10-46	4.7267	0.0219	29.4515	1.77	15.7762	12.8643	94.721	132.239	7.871	27.9038	24.7139	1.1001	1.956	0.3932	0.6066	3.2614	7.5945	20.6467	2.6842	15.7295	10.2909	0.1819	16.1584	33.1491	18.7956	9.0602	0.4418	1.6848	0.5863	10.8553	16.6566	10.8186	0.0374	0.0999	23.6621	11.2037	0.043	9.8727	8.523	12.3877	3.4845	5.5446	338.867	1.7757	14.5682	3.2793	2.5729	10.2638	24.7583
Kluyvera_georgiana	1.3121	2.826	0	0	0.5209	0	3.3568	1.5015	0	19.5294	0.7887	7.1449	19.5744	20.7949	0	2.0186	54.121	6.8573	2.9746	7.9209	0.6375	16.2863	7.4038	2.7162	10.7719	9.6321	21.5252	23.3845	182.216	14.9022	0.8483	77.6616	21.8607	14.3365	3.8426	34.9109	83.0093	0.5886	0	25.0263	19.9245	0	0	6.3704	8.2087	0	2.5838	0.6324	8.945
Pseudobutyrivibrio_unclassified	13.3825	0	0	0	0	1.0203	0	0	0	0	0	0.4121	0	0	0	0	0	0.4446	0	0	0	0	0	0	0	0.0913	0	0	0	0	0	2.7671	0	0	0	0	0	0	0	2.1631	0	0	0	0	2.3522	0	0	0	0
Bacteroides_sp._HF-5092	1.1503	0	3.259	17.8765	4.853	15.0882	3.0386	1.9519	9.3759	6.6984	0	0	6.1621	0	23.4477	1.5154	0	1.0373	7.8325	25.5599	0.4577	0.2557	0.2071	10.0886	0.0875	1.2777	0	3.4622	0	0	6.4923	2.4824	0	0.2461	12.3381	0.4818	0	9.4737	0.7208	0	0.4829	6.9384	0.9874	7.7169	0	39.9827	0	14.1416	0.652
Rickettsiales_bacterium	0.0474	0	0	0	0	0	0	0	0	0	0	0.2183	0.0697	0	0	0	0.3738	0	0	0	0	0	0	0	0	0	0	0	0	0	0	0	0	0	0	0	0	0	0	0	0	0	0	0	0	0	0	0	0.0719
Citrobacter_sp._KTE32	1.9316	1.6888	0	0.0514	0	0	1.4925	1.1389	0	24.9772	0.7829	8.7749	28.5191	27.0918	0	4.9205	71.8367	12.076	5.3575	3.807	1.2451	5.2169	21.4151	1.6356	5.3344	4.9395	10.1196	11.9178	84.6855	13.4999	1.0215	49.389	9.5969	16.0169	3.3734	30.3537	46.4883	0.1486	0	36.6987	24.2894	0	0.0938	4.2932	12.2733	0.2632	1.5864	1.9879	4.886
Streptococcus_salivarius	764.703	360.292	273.642	47.7564	60.1384	122.428	199.825	254.115	280.433	216.955	3264.97	7294.48	23.5664	76.9772	286.213	182.381	1923.65	2521.29	134.67	4711.79	288.921	1188.11	3819.83	6670.54	1945.5	233.319	1381.06	221.014	696.021	133.308	5389.99	14474.6	78.6476	97.2527	155.156	3557.5	176.19	160.026	1577.27	7000.88	387.916	86.3117	8274.39	1075.82	1238.95	395.566	12406.3	4536.6	2449.84
Bacteroides_sp._OF03-11BH	25.4886	0.0074	45.7069	119.336	48.1267	41.6427	24.1677	4.5125	39.3388	44.5433	1.6876	0.64	24.6617	0.3099	132.155	33.565	6.5094	1.1507	31.3439	301.197	0.7004	3.4082	1.4599	16.3816	1.2324	16.395	0.6783	40.2849	0.2298	0.0353	39.4954	19.0393	0	0.6058	77.3247	8.8678	0.1799	20.7623	1.2027	0.2523	1.3481	16.4575	10.4294	228.645	1.7601	294.382	4.1792	49.3199	3.8468
Collinsella_sp._AF19-1LB	2.7216	0	0.1126	0	0	0	0.5303	0	0	0	0	5.5375	0	0	0	0	0	0.2829	0	0	0	0	0	0	0	0	0	0	0	2.5107	0	0	0	0	0	1.6505	0	1.9875	1.4744	0.1449	0	0	1.6158	0	0.2722	0	2.3337	0	1.6574
Collinsella_sp._AF05-8-2	2.4932	22.8826	246.848	13.0079	20.1589	1.826	91.7597	141.918	329.261	153.024	1078.42	9.3442	0.2925	0.8106	0.1313	0.1619	4.1074	4.7605	52.0651	27.8368	181.739	29.1149	12.9526	26.7955	15.9614	7.2155	0.3445	11.711	0.9822	10.3496	7.7634	57.0091	16.1071	4.9493	4.4049	1185.49	0.6875	0.8548	2.2411	24.2426	4.516	8.6416	56.802	77.5071	113.207	1131.77	10.1955	106.955	1.7348
Parabacteroides_sp._AF17-3	24.5844	1.8781	97.462	2.7131	81.5053	30.6035	22.1091	3.6742	3.9464	32.9896	0.7534	0.8857	10.7476	0.242	30.438	14.1067	0	1.4137	12.7042	45.3134	1.5177	1.4164	4.7092	14.8373	0.3517	4.665	0.8116	4.2337	2.2828	0.1606	13.2436	1.4947	12.3664	9.7816	14.9858	0.1935	8.1631	18.9218	0.5626	7.9834	5.626	32.1151	3.8049	4.1239	1.6515	8.2009	2.7508	23.9271	12.1268
Leuconostoc_mesenteroides	1.2166	0.1848	0	0.2071	0	0.1439	0	1.0361	0	0	0.9688	23.8867	0.2551	0.1073	0.4307	10.2767	34.0116	6.1427	0.5189	0.1905	0.3915	2.2791	8.0101	53.1589	4.0402	0.1462	1.0205	0.348	2.1178	0.4844	2.3831	4.8981	0.598	0.5685	3.0744	2.8797	0	1.7122	19.2042	0.934	6.9874	0	0	0.3523	2.5197	0.0863	47.3727	1.3457	1.6146
Olsenella_sp._AM30-3LB	0.6843	0	0	0	0.0173	0	0.0348	0.0167	0	0	0	0.5331	0	0	0	0	0	0.057	0.0505	0	0.2203	0.1239	0.25	0	2.5306	0.0537	0.5349	0	0.0222	0.0282	0.14	0.2031	0	0	0	0.0867	0.1104	0.5441	0.0956	0.3167	0	0	7.171	0	0.1199	0	231.079	0.0191	0.0708
Streptococcus_gallolyticus	1262.67	14.8888	0.2634	0.6446	6.4128	5.6569	0.4477	0.0748	309.347	0.9952	7.1335	22.6621	0.01	0.0622	14.7234	5.2893	8.153	2.4305	1.6621	1.0806	4.5429	6.576	26.7622	27.4153	0.6303	10.0381	5.4084	12.3818	19.2319	11.1052	10.8809	2.4126	58.7881	66.8925	6.9977	1.6803	6.9454	2.1088	3.6313	17.6747	2.9306	0.882	9.7252	13.4171	41.4919	2.9443	20.297	1.1974	188.603
Bacillus_velezensis	0.1822	3.3565	30.9777	0.1958	33.4186	4.9344	67.1668	80.443	37.2423	19.5904	33.5564	5.6643	2.0082	17.849	1.4424	10.0823	17.961	6.2241	9.6008	8.5063	17.5624	1.395	17.4257	24.3043	21.2001	14.1711	7.7797	25.8003	5.3957	2.1058	19.8856	10.9296	1.3831	0.9827	9.2348	1.3139	13.3579	56.8424	15.1375	1.449	4.1348	1.7031	64.63	5.5729	20.1399	10.987	24.811	13.1633	12.9828
Schaalia_georgiae	1.4811	0.1378	1.2321	0.0747	0	0.8928	0.1344	1.1174	0	0	4.2146	4.4591	0	0.1395	0.6985	0.5891	0.7181	0.3687	0	0.8661	9.2519	3.9595	0.3558	7.3147	0.079	0	5.6521	0.9087	2.4178	0.4707	0.797	1.0886	0.214	0.0416	0.4763	0	1.2746	1.7449	5.2374	5.0083	0.4736	0	0	1.2356	1.7293	0	1.4514	0.1472	2.2736
Prevotella_sp._BCRC_81118	4.1883	0.0683	6.3712	1.2186	11.7566	110.431	0	0	616.527	9.6737	13.7987	74.129	1.2083	0	10.1693	10.2179	0	0.3684	0.084	0.3622	0.1232	0.1514	0	16.2426	0	58.9084	5.652	0.3093	0	0	8.1301	0.1724	0.2037	0.0345	5.5997	0.3967	0.1633	18.2538	0	1.4504	0.2211	68.8273	31.6409	0.0533	0.3143	19.3877	0	39.339	2.4902
Clostridium_phage_CPD4	0.0247	0	44.4879	1.2213	0	0	0	0	0	0	0	0	0	0	0	0	0	0	0	0	0	0	0	0	0	0	0.114	0	0	0	0	0	0	0	0	0	0	0	0	0	0	0	0	0	0	0	0	0	0
Anaerococcus_provencensis	0.1237	0	0	0	0	0	0	0	0	0.3604	0	0.054	0	0	0	0	9.364	0	0	0	0	0	0	0	0	0	0	0	0	0	0	0	0	0	0	0	0	0	0	0	0	0	0	0	0	0	0	0	0
Leclercia_sp._W17	0.0236	0	0	0	0	0	0	0	0	4.6255	0	0.1088	0	0	0	0	1.6764	0	0	0	0	0	0	0	0	0	0	0	0	0	0	0	0	0	0	0	0	0	0	0	0	0	0	0	0	0	0	0	0
Selenomonas_bovis	0.0365	0	2.3294	0	0	0	0	0	0	0	0	2.6923	0	0	0	0	0	0	0	0	0	0	0	0	0	0	0	0	0	0	0	0	0	0	0	0	0	0	0	0	0	0.2277	0	0	0	0	0	0	0
Lachnospiraceae_bacterium_MC2017	0.2033	0	0	0	0	0	0	0	0	0	0	0	0	0.1688	0	0	0	0	0	0	0.1089	0	0	0	0	0	0	0	0	0	0	0	0	0	0	0	0	0	0	0	0	0	0	0	0	0	0	0	1.0789
Pseudomonas_fragi	8.0948	0.0567	0	0	0.4104	0	0	0.3541	1.3578	0.5282	0	0	0	0.5546	0	0.0777	1.2453	0.0493	0.852	0.7939	0.9079	0.1004	1.0344	0.2863	0.4355	0.1217	1.6107	5.1386	23.492	0.292	0.1427	25.7936	0.0483	0.7301	0	3.5351	28.3937	0.1975	0	1.2144	1.4489	1.6036	1.6834	0.424	3.3045	0.8301	0.1417	0.1447	0.172
Klebsiella_grimontii	33.8408	4.7679	0	1.1034	0	0	16.3515	11.2295	0	49.7814	0.5745	38.0906	398.643	175.096	0	13.0166	141.698	22.8972	31.6138	8.6083	5.535	26.0021	21.9248	8.9604	35.8575	6.267	7.6458	103.672	50.6406	64.2393	13.6665	136.655	385.426	84.224	3.9217	34.6362	688.356	0	0	199.38	20.8306	0	0	11.3174	12.8169	0.3152	0.2436	0.9416	35.2129
Prevotella_sp._MGM1	1.3081	0.023	159.587	19.6156	1.8773	61.2415	13.1109	0.9569	3.5491	11.4171	2.4874	0.1599	2.8579	0.2306	6.9647	1.5825	0.4636	0.8627	3.8376	14.5263	0.1488	0	0	0.6992	0	3.3651	0.6412	8.0621	0	0.3469	3.1724	0	0	0	36.7596	0.8013	0	14.025	0.2998	0.8837	0.0901	10.6183	18.499	0.7814	2.1832	25.0877	0	6.2523	1.0112
Prevotella_sp._MGM2	10.2698	0	25.6377	34.7025	5.6954	265.52	5.6374	1.3137	6.6317	13.6176	8.4331	0.0369	6.3306	0.1403	6.4095	13.127	1.6515	0.2625	7.0849	37.0529	0.1785	0.2588	0.643	7.2726	0	0.8621	0.7803	6.6624	0	0	9.2112	0.4412	0	0.0389	15.7693	3.1692	0	20.4765	0.79	0.2688	0	10.8841	9.5962	4.5433	3.6358	128.35	0.2279	35.3216	2.947
Alistipes_sp._HGB5	30.0306	1.4516	1153.17	408.214	111.372	556.907	640.794	127.428	302.125	272.321	19.7634	3.397	89.1004	22.6306	226.97	55.8787	21.9722	26.9296	100.557	658.408	1.7149	8.4447	4.1982	64.179	4.6165	182.118	33.015	236.073	5.7475	20.4165	152.226	10.7659	11.9901	13.1644	97.7955	26.1602	14.4464	579.954	13.8028	56.0954	18.4695	565.989	181.455	11.085	91.2062	305.392	16.8151	122.585	53.5331
Alloprevotella_tannerae	33.2775	0	198.828	136.29	73.2518	126.881	93.7322	20.9714	66.1718	71.9487	8.1433	1.0535	21.0061	0.2532	55.5073	27.7145	1.6035	2.3678	50.5017	153.703	0.4355	1.5567	0.4802	32.2908	0.116	29.0618	2.5575	67.5861	0.552	0.8134	49.155	0.1355	0	0.0609	27.4641	5.4837	0	108.191	1.3163	9.3783	0.7251	102.29	42.0719	11.1942	15.9451	200.354	1.7819	30.1135	20.8997
Oscillibacter_sp._CAG:241_62_21	3.8615	7.0029	161.567	2.0587	1.5661	11.0977	40.2327	38.1347	304.092	49.1867	15.4228	47.5578	6.8119	1.1415	8.4713	5.014	26.5571	1.6327	19.635	29.3897	3.9952	0.0647	10.3622	3.2311	14.9515	15.3002	13.2513	15.8351	13.3231	2.9734	91.3967	2.0146	0.7904	2.0465	1.7365	1.7396	1.7485	84.0461	5.9421	3.3634	1.0972	27.2933	39.0888	6.2418	5.47	74.4084	1.9881	81.6851	15.8964
Bacteroides_sp._AF37-16AC	0.994	0.0232	23.2203	77.2632	15.4049	18.6352	91.488	20.8811	27.0742	136.684	0.3427	0	11.6073	0.0324	51.8987	17.223	1.3	9.7473	58.0987	215.671	0.6025	0.2026	0.2611	32.6618	0.1039	4.9957	0.5448	56.8096	0	0.1042	28.899	1.1781	0.0228	0.027	43.3527	7.4818	0	160.383	3.2375	0.2685	0.3848	39.4049	0.8086	0	3.3777	373.783	0.7399	69.3155	1.0933
Muribaculaceae_bacterium_Isolate-013_(NCI)	4.9587	0	0	2.926	0.2021	1.7908	0	0.0768	0.6688	3.0153	1.2243	0	0.0943	0	0	1.278	0.5298	0	0	0.9776	0	0	0.0326	2.1429	0	0.1335	0.0815	0.3057	0	0	2.9741	0	0	0	0	0	0	0.9137	0	0	0	0.3856	0.3316	0	0	10.3036	0	8.0089	0
Paraprevotella_xylaniphila	94.4316	0.4826	1140.19	601.352	362.79	904.76	613.127	115.687	446.097	390.488	23.9383	95.9339	68.2357	1.6767	301.011	93.2523	30.5828	17.67	196.514	976.618	4.918	5.1401	2.7037	118.489	1.4755	224.054	31.6755	519.812	2.2173	9.6663	272.18	10.2019	3.1341	3.8097	134.58	35.125	1.5146	440.771	11.6435	63.8484	7.7417	562.919	192.496	15.2633	97.694	454.123	29.0001	281.476	37.3567
Muribaculaceae_unclassified	3.1228	0.1493	588.545	138.269	60.3821	318.076	311.536	62.3063	168.496	140.478	5.2644	0.434	31.9778	0.7301	93.0984	32.4704	3.3627	8.0098	32.3669	401.313	1.0316	0.3848	0.2967	37.7012	0.5255	96.2523	9.7844	106.514	0.4134	4.5423	75.7891	3.1717	0.1907	1.3263	49.4571	19.4297	0.1949	263.301	5.8229	29.6408	1.5625	249.686	79.6218	0.8151	42.2936	175.969	4.4862	60.0969	28.8652
Prevotella_sp._oral_taxon_472	11.2213	0	2.7953	0	18.2835	28.9959	0.6805	0	2543.93	18.8558	27.6841	438.571	7.2162	0	9.7185	18.8375	0.6915	0	1.6801	0	0	1.3427	0	75.9165	0	180.223	19.4282	1.536	3.4622	0	63.9745	0	0	0	7.5552	2.0234	0	41.32	0	3.9049	0	253.166	123.376	0	4.7152	51.9138	0	79.7446	0
Eubacterium_callanderi	19.6517	3.5083	39.5383	7.9968	15.923	21.9736	51.997	27.9511	23.8855	25.4326	92.3212	7.767	3.4218	22.3119	29.6403	57.5166	4.4375	59.7464	10.8686	47.2007	42.3451	47.9974	5.5562	20.6479	3.9194	10.8029	14.3232	8.2346	13.8169	7.2089	16.8818	15.4916	1.8868	21.7146	16.8203	26.6938	3.299	8.6893	41.4206	24.239	4.3234	5.5158	116.118	19.4083	75.7301	5.8341	5.4043	115.041	8.1344
Enterobacteriaceae_bacterium_strain_FGI_57	0.7137	0.0369	0	0.0667	0	0	0	0.1152	0	0.9535	0	1.5725	0	0.67	0	0	2.5702	0.0964	0	8.2308	0	0	0.1466	0.1562	0	0	0.1433	2.8093	0.1532	0.1104	0	2.3998	0.1257	1.5253	0	0.0895	0.2167	0	0	0	0.2415	0	0	0.1726	0	0	0	0.2638	0.7529
Lactococcus_unclassified	0.046	0	0	0	0	0	0	0	0	0	0	0.886	0	0	0	0	2.945	0	0	0	0.0446	0.0637	0.5407	0	0	0	0.048	0	0	0.2221	0	0.444	0	0	1.2565	0.06	0	0	3.0084	0.1324	0.054	0	0	0	0.4259	0	0.2041	0.1769	0
Streptococcus_sp._HMSC10E12	8.9655	4.0122	1.147	0.0907	1.9858	0.4182	0.6171	0.42	2.4145	1.0321	29.6406	57.8161	0.3949	1.2522	2.3698	1.2287	23.1662	19.3088	1.0996	41.0074	1.7503	8.0668	28.2783	65.4661	13.0053	0.8339	11.9474	2.4155	2.9437	0	34.6637	111.331	0.7237	0.4452	0.375	32.1746	1.5179	0.1793	15.5927	44.7327	3.4904	0.8199	86.103	6.7606	9.0483	2.5877	86.8928	19.972	22.7831
Paenibacillus_polymyxa	47.7317	40.1342	48.9712	8.5882	26.4567	4.6505	85.6135	56.8933	248.778	208.91	67.2429	156.653	422.783	456.138	5.5965	73.6774	415.222	186.179	114.284	135.262	30.9248	242.928	177.401	50.0909	156.876	184.29	334.714	408.184	2519.78	250.468	61.9501	1640.76	469.176	518.552	45.9809	470.792	1618.39	163.714	20.242	289.561	507.187	48.1171	187.562	101.305	85.0438	51.8691	42.2246	54.4226	153.463
Oscillibacter_sp.	17.2542	5.49	60.991	4.6883	12.9147	5.2047	36.1213	32.193	30.0795	29.8748	16.9396	28.514	1.792	4.2855	13.5613	10.2531	9.805	22.1817	9.1249	18.4852	6.1959	6.1417	9.9853	6.378	30.3052	16.3026	2.7391	13.412	4.8859	1.1188	18.1435	8.0239	0.1671	5.6542	8.4756	36.3566	4.2308	27.9322	2.9748	4.6216	3.3718	2.453	27.1255	10.539	49.4817	25.5679	4.0603	15.3388	12.061
Coprococcus_sp._CAG:131-related_45_246	11.0391	4.0397	13.713	5.2209	9.2881	14.3452	23.9209	18.2707	3.9338	78.655	14.1889	33.0366	2.2121	4.4608	24.2013	6.4636	2.4756	7.6007	13.074	12.4929	29.2446	13.4951	10.0487	10.4867	4.7516	11.74	8.0703	6.0083	3.6858	4.9601	11.935	11.046	4.2033	6.0953	9.9011	28.0359	6.5937	29.1647	5.4453	29.0302	5.2586	3.621	13.1004	5.5282	78.2944	13.7417	5.8646	75.8131	11.1089
Blautia_sp._TF11-31AT	1.9352	0.3064	1.7587	1.4469	2.1594	3.6279	12.103	9.3682	2.6288	4.1583	5.8901	2.1475	0.2262	3.1203	8.601	0.9731	2.1616	5.8686	15.9595	2.8853	17.0918	0.9499	6.5332	5.2099	1.5547	2.4946	0.831	0.9767	12.2369	6.2406	5.7822	1.481	1.3909	23.4759	0.5853	2.6359	2.8328	27.6209	2.2702	17.0666	1.1728	1.0692	18.3629	0.4326	11.2231	3.3269	2.5334	12.9764	3.1097
Citrobacter_sp._MGH106	10.6966	5.7934	0	1.0521	0.4591	0	5.5897	3.6057	0	28.0402	4.5991	29.7109	101.567	81.2036	0.4305	8.3248	109.801	37.1786	23.4928	28.5164	1.2584	37.3985	26.7272	8.3994	25.0713	32.3946	35.2728	13.8525	49.2646	45.7698	0.7109	25.5934	66.2119	57.3456	7.5989	27.9421	56.8093	0	0	35.6165	80.2268	1.3554	0	21.8007	18.8618	2.4546	1.2004	3.4664	24.1466
Ruminococcus_sp._AF25-19	0.1497	0	1.7044	1.4712	0.9084	0.9145	0.7469	0.1587	0.8196	0.5749	0.125	0	0.1257	0	0.3386	0.1392	0.253	0	0.2561	1.1183	0.0458	0.0327	0	0	0	0.2727	0	0.6244	0	0	0.4476	0	0	0	0.1084	0.0617	0	1.773	0.0923	0	0	3.3761	0.6322	0	0	3.6344	0	0.1818	0.1945
Alistipes_sp._cv1	0.0138	0	0.6577	0	0	0	0	0	0	1.4261	2.2517	0.1267	0.1213	0	0	0	0.1085	0	0.7577	0.1541	0	0	0	0	0	0	0	0.0803	0	0	0	0	0	0	0	0	0	12.483	0	0	0.0178	0	0.1626	0	0	3.0161	0	2.2797	0
Curtobacterium_sp._MCSS17_007	0.0957	0	0	0	0	0	0	0	0	0	0.14	0	0.1056	0	0.1895	0	0	0	0	0	0.0513	0	0	0	0	0	0.7736	0	1.1817	0	0.0716	0	0	0.2009	0.182	0	0.1114	0	0	0.3046	0	0	0.5662	0	0	0	0	0.5087	0.363
Brevefilum_fermentans	0.6688	0.4727	2.4975	8.1231	11.3094	11.8025	12.2772	0	0	0	0	0	0	0	0	0	0	0	0	0	0	0	0	0	0	0	0	0	0	0	0	0	0	0.0217	0	0	0	0	0	0	0	0	0	0	0	0	0	0	0
Slackia_faecicanis	1.8528	0	0	0	0	0	0.0483	0.0461	0	0	0	0	0	0	0	0	0.3433	0	0	0	5.5147	0	0	0	0	0.5709	0	0	0	0	0	0	0	0	0	0	0	0	0.0268	0	0	0	0	0	0	0	0	0	0.0189
Eubacterium_sp._AF19-12LB	16.5004	11.855	1.6473	2.0178	4.1488	10.9956	13.6619	19.1576	13.5082	8.3983	10.4446	21.1284	39.3666	57.6749	8.2741	47.3071	21.0358	94.5942	31.0934	32.9929	5.5909	19.2895	44.9388	17.2448	21.8663	59.929	45.3626	8.1199	14.8426	46.12	6.48	43.2887	26.1357	27.0409	26.8721	24.6174	15.6916	39.5964	1.6291	32.5256	44.1223	7.6461	5.0182	19.8763	47.7915	14.2361	11.4781	24.8122	11.8553
Harryflintia_acetispora	63.5099	6.1656	3.2575	1.8452	1.2135	2.8603	5.1467	5.6435	2.4694	2.8941	8.2648	4.4592	0.1592	0.3454	0.557	1.7307	1.3053	9.1992	3.4841	5.2399	1.472	0.6813	14.6653	1.5438	3.4804	12.1601	20.4012	7.585	1.8632	32.5496	6.8228	1.7309	0.0682	18.6935	1.9078	2.1975	0.7946	1.7904	1.7781	4.6766	5.9618	0.7149	26.8202	11.1253	4.781	5.1607	7.0372	3.5494	71.3094
Parabacteroides_timonensis	1.6569	0	11.4619	1.075	0	0.4887	0.1109	0	0	2.8528	0.1671	0	0.3989	0	23.2618	0.372	0.1127	0	0	1.1205	0	0	0	0	0	0.0364	0	0.2503	0	0	0.299	0.2666	0	0	0.6879	0	0	1.5584	0.0308	0	0	0.089	0.2534	0	0.0427	2.2713	0	0.425	0.0217
Parabacteroides_sp._AF17-28	0.1753	0	0	1.508	0	1.9997	0	0	0	1.3468	0	0	0.5154	0	0	0	0	0	0	0	0	0	0	0	0	0	0	1.024	0	0	0	0	0	0	0.8888	0	0	1.5304	0	0	0	0	0	0	0	5.7682	0	0	0
Finegoldia_magna	6.3695	0.0627	64.1718	26.3052	27.9013	40.4454	16.7824	1.9568	16.8448	27.3991	3.7005	37.7728	10.1538	0.3503	28.811	5.9136	2.4956	0.9827	8.8429	71.1124	0.5157	0.9876	0.3737	12.2125	0.1699	9.7145	2.1956	43.8871	0.3763	0.2813	62.768	0	0.1068	0.4425	25.9303	8.2153	0.7066	40.9633	1.6577	2.6385	1.0943	19.5006	15.9024	11.4943	7.4056	145.145	0.8533	23.6861	10.9547
Moorella_glycerini	0.0505	0.5398	18.2328	0.434	1.3641	0	2.5458	3.183	7.4141	13.3715	36.8826	3.254	1.2608	0.2514	3.1962	4.6817	12.5366	32.2845	3.1427	8.4818	0.5405	0.2318	0.9534	11.6853	2.0725	2.8312	0.3494	7.0724	1.4945	1.0768	78.7703	1.7491	0.3065	0.3024	1.0231	4.6582	0.8222	10.5695	5.554	1.6053	0.1309	1.1531	125.01	3.742	6.6337	15.4925	4.3546	3.0026	0.8416
Coprococcus_sp._AF16-5	19.4031	0.0686	4.6012	0.1241	0	0	1.1202	0.5355	0	0.2217	3.2068	0.133	0	0.0479	0	0.2349	0	1.524	0.6223	54.3393	0	0.1768	0.2045	0	0.5927	0.0736	21.9201	0.1686	0.7124	12.6266	0.1726	1.1544	0	0	2.4873	0	1.6797	0	0.0623	0	0.1497	0.06	0.1707	0	1.2936	1.5825	0.3114	0.8588	0
Bacteroidales_bacterium_55_9	0.2238	0	3.5684	0.1604	0.2882	1.4892	0	0	1.43	1.4328	5.6721	0.1718	4.6061	0.2478	1.7724	0	0	0	0.715	12.2635	0	0	0	0	0	11.0374	0	5.6649	0.3683	3.4499	25.6612	0	0.0755	0	0	0	0	12.6988	0	0	0	0.775	3.0883	0	5.7964	5.7273	0	0.3171	25.3426
Bacteroides_salanitronis	20.1125	0	24.1099	0	19.63	10.8031	0	0	0	1.2385	0	0	0.3555	0.2329	2.5533	0	0	0	0.1931	17.7673	0.3454	0	0	0	0	17.1746	0	2.3541	0	0.8731	2.9365	0	0	0	0	0.8094	0	0	0	0	0.1819	0.6699	0	4.4839	4.2106	10.1131	1.7024	0.6853	0
Streptococcus_sp._SK643	0.4365	0.0207	0	0.075	1.2243	0.6779	0	0	0	0.402	0.2317	11.2863	0	0.0579	0.1842	0.2426	9.9557	0.1084	0	0.296	0.5108	0.5657	8.7015	2.9294	0.0796	0.1269	2.3639	0.1157	3.0011	0	1.1187	0.3509	0.1782	0.4912	0.0884	1.3769	0.1734	0.3458	0.4449	3.1724	0.2509	0	2.072	0.5527	3.9787	0	1.4131	0.8559	3.3345
Rikenella_microfusus	12.0398	0.0405	10.4451	5.1868	6.556	25.9836	1.387	0.3315	4.5663	2.402	0	0	0.9849	0	29.3588	0.0727	0.1762	0	1.9431	105.111	0.5742	0	0	0	0	2.0509	0.1031	3.5221	0	0	0.4008	0.1191	0	0.0536	14.8609	1.2888	0	7.7981	0	0	0.1159	14.9069	0.2641	0	5.7024	21.3695	0	5.1267	12.4638
Porphyromonas_unclassified	0.7142	0	3.1946	9.0481	0	2.8567	0	0	0	4.2453	0	0	3.2399	0	17.4536	2.2833	24.5371	0	0	8.9826	0	0	0	0	0	0	0	2.0858	0	0	0	0	0	0	2.0317	1.3054	0	1.749	0	0	0	0	0	6.3159	0	17.5793	0.5404	0.9616	0
Bacteroides_eggerthii	716.981	2.641	1058.1	901.299	913.551	2005.44	802.502	146.498	439.715	769.233	58.7819	13.1196	215.956	18.1081	1119.95	253.931	20.5568	29.9624	567.24	1227.42	6.4358	14.824	9.3596	274.216	12.3069	110.662	19.3396	588.971	5.6219	15.8771	732.764	14.5536	21.3887	24.7337	301.854	81.1407	9.0936	612.24	34.6633	24.7971	40.2039	1073.74	186.868	113.793	55.9012	897.745	60.6211	270.246	122.641
Roseburia_sp._CAG:100	47.7853	31.802	34.0343	7.5333	19.9072	8.6181	58.6918	39.7017	21.9948	120.273	106.626	88.2176	242.086	280.893	41.2569	147.508	222.821	105.937	94.6025	85.1644	32.3305	142.524	115.463	96.2109	104.838	130.631	200.455	247.243	1533.81	154.55	45.2211	902.065	238.916	305.729	36.614	320.502	900.63	125.367	8.4061	160.049	272.962	13.2686	139.317	72.7269	100.352	97.9941	29.6983	160.714	82.9401
Butyricicoccus_sp._AM27-36	50.5488	453.775	195.94	18.8262	157.86	73.2148	143.093	155.092	86.1797	71.9803	49.9347	4.9831	7.2155	16.1446	101.319	15.3394	21.3286	90.7826	64.2556	58.3984	63.9857	392.766	63.1274	112.041	56.3241	38.1377	4.6389	12.698	86.3919	55.3934	178.935	122.812	12.5907	5.0832	98.6025	126.196	47.0647	517.079	64.4641	69.1959	10.7065	27.8058	156.577	36.9589	156.162	91.9272	8.5187	183.74	94.1605
Ruminococcus_sp._AF24-32LB	46.5881	20.1288	39.1489	23.9077	60.7861	47.9323	90.5373	152.449	64.3358	143.245	113.197	51.3542	18.8294	34.5207	80.9938	30.8731	29.117	88.7462	54.0254	38.8212	91.1884	37.3478	125.697	44.2933	184.517	107.214	96.8419	54.8214	31.4233	96.6354	62.0223	104.183	10.7947	46.774	68.465	72.2856	19.1204	188.434	60.6127	182.507	27.5504	23.4377	197.677	181.155	85.4999	38.7782	55.5327	100.456	92.8353
Lachnospiraceae_bacterium_CAG:215	29.6924	11.5067	1.437	7.5073	32.5845	2.6081	2.4528	2.596	3.4799	1.5051	6.274	115.368	0.061	8.7689	9.0258	10.8909	1.1253	5.6723	1.6898	15.4883	5.2279	33.1421	15.3555	25.3994	10.1129	4.211	65.8585	1.6711	26.5862	0.037	4.1777	0.5406	48.3374	33.1395	53.938	7.6722	88.5118	4.2664	0.6667	301.72	24.0944	1.6195	29.1008	0.9525	33.0162	1.3176	115.425	0.4502	51.5804
Gemmiger_sp._An120	0.1733	0.1763	0.2399	0.1537	0.3801	0.0858	0.4527	0.4887	1.2019	3.2917	1.0739	1.3325	0	0	1.2289	0.0367	0.5194	0.7404	0.0721	0.506	0.0161	0.0231	0.1511	0.2084	0.4455	0	0.1042	0.6158	0.0929	0.0268	0.3896	0.0602	3.4542	0.0541	0	0.1713	0.0175	1.8549	0.0812	0.1556	0.3467	0.1329	0.2646	0.0349	61.364	0.3713	0.1116	0.2719	0.291
Faecalitalea_sp._Marseille-P3755	16.7015	0	0	1.4884	0	0	2.5504	0.507	0	0.1948	1.3612	0	0	0.1513	0.374	0.7908	0	0	0.0393	1.0298	0	0.1085	0.3347	0	0	11.57	0	0.6206	0.2248	1.2599	0	0	0	0.0849	6.8882	1.1241	0	0	0.3932	0	0.3348	0	0.4189	1.6606	19.3555	0	1.2283	0.1936	2.8697
Bacteroides_stercoris_CAG:120	86.0997	3.701	574.616	202.08	231.601	2337.06	138.862	28.3278	1012.97	571.62	19.2697	58.1772	139.691	29.7489	121.414	43.4411	21.1767	22.5718	541.843	603.656	1.321	20.1969	10.1926	82.8388	15.65	122.475	28.4385	217.792	37.2029	29.211	214.396	15.8806	30.4267	27.2968	71.5516	53.4562	38.6256	251.453	6.2065	22.8206	58.6628	961.685	71.5461	30.9199	31.3805	437.814	38.6372	171.343	165.151
Clostridiales_bacterium_VE202-16	68.7528	134.889	125.9	26.4133	149.505	46.8622	338.745	410.443	67.408	355.245	264.573	83.8633	18.185	17.4171	194.229	93.4486	114.494	189.783	100.815	179.168	110.454	63.6822	63.8766	312.997	196.095	107.24	213.172	960.916	116.403	262.827	273.131	255.047	42.433	61.1937	633.549	257.629	2446.76	395.186	330.174	358.036	74.3278	54.3182	241.635	198.449	275.109	253.647	50.1386	184.914	81.3225
Parabacteroides_sp._merdae-related_45_40	8.4612	0	112.747	19.44	348.706	34.6526	255.611	31.8522	330.103	49.9186	1.9301	10.9432	33.3929	0.2496	13.0018	122.035	5.0847	0.104	15.783	64.7876	0.5166	1.0346	0.6429	81.3771	0.2823	15.9265	4.4491	432.046	0.587	0.3531	218.565	0.4621	0	0.1572	7.4397	4.2324	0.0478	804.267	2.2249	3.4198	1.1308	93.6526	81.5498	8.3358	7.6084	194.239	3.7737	124.37	1.9617
Oribacterium_sp._oral_taxon_078	49.3871	0.9567	1.0959	1.9149	2.0941	6.2695	10.5375	6.3696	2.7167	7.4624	9.0425	11.1033	0.4963	2.1003	4.3588	6.4556	4.0122	1.9309	2.6556	3.6147	2.9817	0.6008	7.437	9.7754	13.5988	2.7109	3.327	7.3302	0.338	1.3295	9.827	1.8508	0.2017	1.4504	3.6483	4.1185	0.6176	22.6671	3.9215	3.437	0.4089	1.8104	26.5357	6.3946	11.6826	2.108	1.4467	5.9182	4.3895
Streptococcus_sp._FDAARGOS_192	14.3923	6.7294	3.8402	0.3355	0.1341	1.4958	1.5936	1.0779	4.9338	1.0993	51.6717	86.2267	0.3592	1.1115	3.6283	1.234	29.5239	46.2673	2.1246	79.3652	2.1472	13.319	65.0746	120.45	38.506	2.4459	22.9394	2.6368	10.4908	0.09	61.0459	235.159	0.9606	0.2711	0.4946	58.151	1.8847	0.9721	24.1257	118.752	4.4488	0.7401	156.801	14.5673	17.1427	6.6963	106.394	61.8612	50.1857
Bifidobacterium_sp._UTBIF-68	0.3281	0	0	0	0	0.5847	0	0	0	0	0	0.6613	0	0	0	0	0.3235	0	0.0983	0	0	0	0	0.413	0	0	0	0	0	0	0	0	0	0	0.104	0	0	0	2.2131	0	0.1064	0	0	0	0.1226	0	0	0	0.4353
Escherichia_sp._4726-5	1.1541	1.4775	0	0.3818	0	0	1.3782	0.3294	0	2.0458	0	8.1791	15.659	16.9548	0	1.3006	10.5038	6.3422	4.6789	2.9847	0.7608	6.2544	2.5162	1.3409	6.28	4.3022	11.6815	2.5925	5.6973	10.2623	0.2655	4.4979	13.3911	14.9001	1.8002	0	8.2665	0	0	0.5649	10.4783	0	0	2.7982	1.3264	0	0	0.3774	6.5963
Citrobacter_sp._wls716	0.3559	0.3548	0	0	0	0	0	1.1075	0	0.7939	0	0	0	0	0	0.1872	5.393	0	0	1.6723	0	0	1.0574	0	0	1.5224	0.6889	0	0	1.1246	0	0	0	0	0	11.1932	0	0	0	0	0.3871	0	0	0.9796	0	0	0	0	14.0289
Lawsonella_clevelandensis	5.8305	0.2296	0	0	0	0	0	0.1637	0.7553	3.5318	0	0.3136	0	0.0337	2.2972	0.1436	149.608	0.5256	0	2.0811	0.1789	0.262	0.1541	1.7224	0	0.2795	0.5453	0.1241	0.7694	0.2724	1.0798	0.0728	0.1748	0.0243	0.6284	0	0.5318	1.127	0	0.3078	0	0	0.2658	1.0225	0	0	0.4786	0	0.4458
Klebsiella_variicola	64.2866	57.1993	223.415	74.0073	137.113	102.668	108.643	69.6085	115.608	156.763	71.5336	115.104	216.438	264.384	20.9128	61.3972	285.498	113.666	104.729	107.978	47.9456	118.498	119.038	87.4792	133.783	107.4	295.215	470.537	3175.59	237.695	68.308	1876.1	250.53	221.86	41.7511	566.334	1835.99	58.3142	37.9587	291.495	247.798	26.402	54.2141	58.522	67.8844	42.2789	59.0298	46.7598	99.9739
Bacteroides_sp._D2	10.1772	0	67.5111	234.767	85.9323	68.9086	50.3274	12.5737	65.6636	84.4453	3.7286	3.1136	52.4451	0.3127	205.921	72.9043	1.72	1.162	59.8696	482.365	1.3585	0.2885	2.9679	132.788	1.484	28.8786	1.3265	83.1802	0.194	0.3427	139.549	18.2642	0	1.2514	173.617	16.3286	0.1382	41.7737	3.2428	1.0099	3.4311	49.1209	12.3234	307.893	2.4476	440.882	4.2914	114.784	19.0598
Cetobacterium_somerae	5.6968	1.338	4.8063	0	0.0206	0.1145	2.0748	2.8917	1.6624	5.4122	5.0634	14.7845	63.6664	36.6672	0.2512	5.2508	22.0556	12.3713	8.8884	7.4956	0.5565	19.6676	12.1199	1.1002	6.125	19.2132	18.9155	2.4941	6.5009	22.3275	0.6505	13.5756	30.7952	29.7502	3.1584	18.748	1414.52	0.4589	1.0155	2.3442	29.7511	0.3483	2.5183	5.8642	3.8611	0.342	3.2457	1.4602	10.3386
uncultured_Citrobacter_sp.	9.3315	7.525	0.2518	0.3389	0	0.3448	19.6096	16.7425	0	67.1802	2.994	28.1426	78.1739	72.7444	0	15.9353	224.527	31.4904	25.9104	27.0541	6.8852	21.3294	33.298	5.1671	28.9122	26.4223	64.1399	110.425	721.41	54.9436	13.3808	429.101	57.715	93.3601	13.6641	131.706	418.756	1.1278	0.8904	119.051	74.4139	0	7.9634	24.4938	22.9198	0.2598	9.2438	2.4805	34.3103
Klebsiella_sp._OBRC7	1.0677	0.754	0	0.3256	0.0554	0	1.4272	2.4896	0	5.8084	0	5.6993	11.6305	9.6769	0	1.6077	14.5198	1.9032	2.4529	6.0632	0.8809	5.3579	4.6475	0.0361	3.5037	6.7522	5.7067	28.0102	17.6081	9.2596	0.1716	12.7218	14.692	10.6517	1.3895	4.6251	12.8679	0.2834	0	1.6224	11.6652	0	0	4.6048	1.5511	0	0.2127	0	2.8986
Citrobacter_sp._A316	0.0354	0.2947	0	0	0.1368	0	0	0.1314	0	5.4418	0	0.1632	0.0521	0.2941	0	0.6919	18.44	0.11	0.1697	0	0	0.0542	0.4183	0	0	0	0.0818	0.2069	2.2732	1.1969	0	0	0.4303	0.2972	0.2693	7.9709	0	0	0	0.2254	0.6432	0	0	0.6567	0.2117	0	0	0	0
Salmonella_phage_SEN22	1.9062	0.1283	0	0	0	0.1025	0	0	0	3.7297	0	15.0767	9.1458	19.4718	0	0.4684	6.2412	1.0054	0.9478	5.2399	0.1541	6.8855	1.0194	0	0	1.6512	0.1661	0	5.8592	4.4134	0	7.2889	0.1456	17.7213	1.8233	0.2075	11.2191	0	0	1.3732	0.4665	0	0	0	0.4299	0.1972	0	0	0.1636
Bacteroides_vulgatus	64177.9	315.997	47138	169494	60644.4	62484.4	30129.6	6448.66	86533.6	25856.8	11821.6	1332.49	8724.32	287.046	41498.9	30086.7	900.504	1091.74	15688.1	12434.6	562.099	855.311	1920.39	24548.4	503.99	15133.3	2869.14	39654.4	423.529	451.92	13464.2	2206.02	77.6146	2087.18	4813.7	5934.11	298.605	15509.5	1204.18	1465.52	1390.27	116949	9566.98	18537.7	3551.14	44685.8	1075.2	39003.4	40848.1
Clostridium_sp._AM42-4	3273.42	101.781	395.953	495.699	555.965	275.056	499.301	498.054	742.578	202.063	344.198	260.032	44.2517	633.543	225.164	290.937	38.704	366.464	197.407	211.497	243.709	442.704	1251.64	134.227	1457.76	644.946	270.874	222.539	441.872	1505.47	164.957	496.602	19.328	413.959	804.114	131.169	21.9646	421.553	294.228	193.747	98.5636	377.547	1616.38	1105.22	1502.98	192.775	47.0836	255.311	171.825
Streptococcus_sp._C150	5.6286	2.0391	1.2592	0.0669	0	0.3094	1.716	0.3457	1.9225	0.2039	26.8157	53.7107	0.1554	0.4961	2.7927	0.4723	18.2669	14.0391	0.641	73.7282	1.7543	8.2616	25.3638	46.285	15.6675	1.5167	10.4381	0.4846	6.7394	0	31.6884	105.682	0.5676	0.0965	0	24.4347	0.3024	0	11.6044	54.0009	3.0524	0.6827	81.8355	6.7694	10.5295	2.0664	149.49	23.8738	23.0135
Ruminococcus_sp._AF17-12	3.1451	0.3309	0.606	1.0071	0.4404	1.0437	4.7041	6.1579	3.5443	2.8938	2.137	1.5011	0	2.3345	1.988	0.7806	7.7887	3.0539	2.4845	1.2923	11.0155	0.2492	5.8443	3.8107	8.1593	3.2338	9.9178	1.1272	4.5403	2.6133	5.5991	2.6708	1.495	3.1596	8.0831	1.7427	0.0829	10.2515	19.4254	3.5387	0.513	0.1238	11.3428	0.6434	9.519	1.3728	135.174	5.2703	0.6206
Escherichia_sp._KCJ4928	0.5943	0.1413	0	0.5112	0	0	0	0	0	1.8262	1.3903	0	2.9704	7.1068	0	0.9675	11.2515	1.4769	1.9934	9.7692	0	5.4617	0.8423	0	1.085	2.4255	6.037	4.8598	4.1077	8.0332	0	0	19.3745	6.2703	0.3013	1.7147	3.874	0	0	13.237	25.7479	0	0	0.6612	3.1967	0	0	0.5053	4.5063
Chryseomicrobium_excrementi	0.0655	0	0	0	0	0	0	0	0	0	0	0	0	0	0	0	0	0	0	0	0	0.251	0.2322	0	0	0.1672	0	0	0	0	0	0	0	0	0	0	0	0	0	0	0	0	0	0.0608	0	0	0	0	0
Enterobacter_oligotrophica	0.8283	0.4267	0	0	0	0	0.2143	0	0	0.6363	0	1.7807	2.6381	2.6137	0	0.6742	0.7623	0.5146	0.6615	0.1031	0.1183	1.6493	0.1957	0.417	0.6301	0.7043	1.6573	1.1289	1.0905	0.9821	0	2.0616	1.5933	1.291	0.21	3.5848	0.7713	0	0	0.2635	2.3995	0	0	0.1536	0.8251	0	0	0	0.3768
uncultured_Eubacterium_sp.	62.9082	62.7909	15.3063	20.3866	69.3589	58.1415	102.218	98.4361	173.347	300.192	198.2	62.6021	15.0793	19.1999	36.7984	189.132	18.4467	279.229	246.801	43.2139	222.542	192.729	102.001	254.572	99.2673	92.5144	186.315	47.3928	107.628	56.2079	90.2311	154.898	52.2495	115.687	163.055	185.382	4.4949	291.754	79.0798	305.334	32.5021	82.0702	136.347	153.015	311.008	175.426	329.455	152.55	18.9956
Candidatus_Saccharimonas_aalborgensis	0.0227	0	0	0	0	0.388	0	0.021	0	0	1.0278	0.3526	0	0.0471	0.0299	0.0738	0	0.0352	0	0	2.3565	0	0	3.1685	0.0776	0.1301	0.746	0	0.6437	0.0403	0.1357	0.2117	0	0.0408	0.0144	0	1.5574	0.2474	0.0979	4.4916	0	0.0471	0.2347	0	0.6438	0	0.0612	0	0.1719
Fusobacterium_ulcerans	25.7519	1.5077	0	1.3305	3.1885	0.5465	1.1212	0.5066	11.8199	0.9121	3.1415	19.6959	0.0928	0.0271	0.1357	3.8672	5.1047	0.1566	1.1179	0.674	1.8283	128.975	0.6131	1.352	0.7617	0.4104	59.4204	0.3955	0.2416	0.2742	3.9614	0.9339	1.558	0.7609	15.3692	19286.6	49.0584	3.6405	11.474	54.0268	0.8781	62.8923	12.8847	2.7508	0.2427	0.7316	1.3769	0.077	1.3828
Bifidobacterium_saeculare	35.3229	5.9893	147.403	18.8235	58.441	125.109	138.66	113.132	104.598	100.536	254.521	150.109	8.7841	89.8178	54.2247	30.0652	193.69	18.4945	69.5558	114.001	126.659	23.193	48.0402	37.7479	252.039	66.6337	7.4962	57.2931	9.7967	30.4352	148.917	22.7969	6.5005	9.2494	38.5263	25.7046	10.8667	248.698	128.23	12.195	10.8074	25.1122	445.113	44.8006	121.56	257.738	18.0698	122.599	11.9542
Bacteroides_thetaiotaomicron_CAG:40	1.3164	0	8.8682	35.883	56.9433	50.9592	30.5144	5.9116	36.3894	26.9404	16.365	9.7929	15.3197	0.0299	35.468	25.3767	0.4306	2.3965	17.5107	108.21	0.5688	0.0529	0.0332	210.169	0.0325	5.7401	0.7136	21.4993	0	0.0848	4.0121	10.0061	0	0.9532	55.081	4.3352	0.3658	34.1453	2.8274	0.2617	0.8923	23.9472	6.5816	4.8584	1.4761	116.32	0.5762	57.0227	3.1658
Haemophilus_pittmaniae	0.0542	0	0	0	0.3137	0	0	0	0	0	0	0	0	0	0	0	0	0.8411	0	0	0	0.0829	0	0	0	0	0	0	0	0	0	4.6213	0	0.0974	0	0	0	0	0.2922	0	0	0	0.3202	0.0502	0	0	0	0	0
Lachnospiraceae_bacterium_OM04-12BH	1.647	24.4223	8.3435	7.2402	8.6882	2.6411	8.0023	3.6497	4.3528	41.5385	8.2926	0.6096	0.5572	5.0871	9.7324	13.3873	0	12.4696	54.7054	5.9319	54.214	80.6748	8.1263	30.7455	29.2984	5.3044	6.7205	21.5355	6.0735	10.4436	38.3458	24.7053	0	2.1309	0	31.0526	0.4413	40.0503	2.613	0.842	7.1112	19.2554	10.5211	45.1438	92.1449	6.6477	3.5689	96.677	7.2534
Eubacterium_sp._Marseille-P5640	0.3641	19.9044	0	0	0	0	0	0	0	0	0	0	0	0.2223	0	0.2986	0	0	0.0743	0	0.5543	0	0	1.8512	0	0	0	0	0	0	0.0962	0	0	0	0	0.1714	6.7383	0	0	0	0	2.0347	0	1.4348	0	0	2.7159	0	0.3548
Pseudocitrobacter_sp._RIT_415	0.1798	0	0	0	0	0	0	0	0	0	0	0	0	0	0	0	9.22	0.5586	0	0	0	0	0.4247	0	0.8207	0	0	0.5251	1.7755	0.3198	0	1.9181	0	0	0	2.0753	2.0931	0	0	7.4379	1.1662	0	0	0.6668	0	0	0	0	0
Prevotella_multiformis	47.2696	0	270.084	3.016	181.119	91.4538	52.2628	9.1957	0	86.9162	3.5545	2.1538	25.2224	0.1553	68.4922	34.4023	0	1.3071	24.5301	72.1354	0.8014	0	0	20.4798	0	9.0633	0.5397	13.9268	0	0	25.0304	0.9974	0	0.3363	8.4144	0	0	53.8691	0.6055	14.8759	0	72.0763	7.7412	9.4491	5.0295	27.6873	0.6305	44.5179	0.2127
Streptococcus_sp._C300	0.0111	0	0	0	0	0	0	0	0	0	0.2608	7.8585	0	0	0	0.0726	0.1759	0	0	0	0.1672	0.0171	0.1053	0	0	0	0.3089	0.0651	0.1101	0	0	0.0892	0	0	0	0	0.1298	0	0	0.8869	0.0723	0	0	0.0207	0.4998	0	0.2406	0	0.0338
CRESS_virus_sp.	48.0453	0	0	0	0.9391	0	0.1189	1.0638	1.9471	0	1.6671	1.1034	0	0.6253	0	0	0	0	0	0	5.5261	0	0.1447	0	5.2785	0.0781	0	0	16.5008	18.1936	0	0	0	0	0	1.1257	0	1.0118	0.6892	0	0	0	0	0	0.4234	0.2958	0	5.4239	0
Pseudomonas_sp._424	0.0428	0	1.1363	0	0	0	0	0	0	20.3669	0	0	0	0	0	0	51.1036	0	0	1.4378	0	1.3099	0	0	0	0	0	0	0	0.0761	0	0	0	0.1025	0	0.2468	0	0	0.1846	0	0.1664	0.1777	0	0	0	0	0	0	0
Coniochaeta_pulveracea	0.3634	0.6912	2.1242	0.3125	0	0.2072	0.8462	0	0.2322	0.1396	0	0	0	0	0	0	0	0	0	0	0	0	0	0	0	0	0	0	0	0	0	0	0	0	0	0	0	0	0	0	0	0	0	0	0	0	0	0	0
Lachnoclostridium_sp._An181	5.5946	2.2289	0	0.8299	6.1926	0.2739	2.2436	2.2131	0.9023	0.4416	0.3712	3.3293	8.1682	6.1089	1.7751	3.064	2.1625	3.095	1.1121	1.4317	1.5962	3.6496	4.1713	4.544	2.7681	6.4618	3.6648	0.1119	3.5066	3.067	0.1571	1.6351	4.2045	11.3129	13.7165	0.5227	7.0332	0.7375	0.4814	6.8454	5.3825	0.5148	2.8624	2.9871	5.5277	0	4.9423	2.6473	12.7174
Clostridium_sp._AF37-5AT	337.506	72.9974	124.897	40.5981	107.938	59.0724	398.287	443.822	129.062	225.609	246.552	93.709	9.494	25.5323	153.662	117.197	56.3626	259.074	133.503	119.435	108.103	77.4332	332.506	68.0279	197.564	121.634	25.141	73.259	52.6724	159.365	117.261	88.7307	18.2419	52.2699	147.373	155.991	7.9413	325.123	67.0115	158.137	78.6484	70.9306	279.491	302.066	164.606	107.473	71.9609	247.41	705.822
Prevotella_stercorea	16.9555	1.8812	38.8782	58.5144	74.7572	42.3935	49.8104	11.0268	599.864	30.4658	15.0909	103.47	4.8441	6.4152	37.2112	28.7996	5.4409	10.8454	4.6062	5.5437	23.6236	1.2295	7.4593	105.122	18.4046	190.863	17.4504	29.4998	3.4504	2.9918	32.5625	8.3678	0.4733	1.1664	11.182	20.1964	1.7751	59.9999	3.2385	45.3825	2.417	1358.6	105.818	20.029	4.4254	11.6637	16.7531	122.008	36.479
Bacteroides_sp._KFT8	2.4166	0	58.0178	85.9132	15.2317	23.9937	16.2238	3.6516	34.4409	12.6162	6.4476	1.1886	24.1744	0.0879	33.9511	13.6028	0.1238	1.626	7.3462	231.754	0.5578	0.0811	0.5906	7.3645	0.8241	11.9382	1.2581	26.127	0	0.4522	20.1188	8.1861	0	0.5707	23.1752	16.1602	0	22.9801	0.8409	0.0759	0.9571	27.1692	4.4782	63.6943	2.4471	144.831	2.0636	18.3071	0.7589
Sphingobacterium_gobiense	0.0259	0.0615	0	1.0573	2.5987	0.9593	0.6027	0	0	0	0	0	0	0	0	0	0	0	0	0	0	0	0	0	0	0	0	0	0	0	0	0	0	0	0	0	0	0	0	0	0	0	0	0	0	0	0	0	0
Coprobacillus_sp._AF34-1BH	10.1872	0	0	0	0	0.2919	0	0	0	0	0	0.4716	0	0	0	0	0	0	0	0	0	0	0	0	0	0.1306	0	0.299	0	0	0	1.3651	0	0	0	0	0	0	0	0	0	0	0	0	1.3767	0	0	0	0
Clostridiaceae_bacterium_TF01-6	1356.84	146.926	295.405	95.5143	587.138	223.55	1518.01	1540.79	709.298	379.63	1041.49	218.681	18.3206	33.5161	455.219	610.046	98.2825	383.916	453.1	175.128	144.225	433.891	2064.95	140.95	927.698	93.6287	33.2991	723.662	152.196	418.68	290.051	183.688	98.965	365.83	106.617	237.901	29.4563	474.648	226.418	291.162	59.6882	103.584	329.166	2821.29	377.133	232.015	74.441	448.014	954.71
Lactobacillus_rhamnosus	10.353	51.2134	366.489	47.0357	280.54	369.472	805.589	1081.92	214.434	568.881	254.869	39.2303	36.3265	49.0847	123.85	203.054	321.383	441.389	282.424	298.173	240.767	8.4396	177.484	109.293	408.482	304.524	17.3466	166.283	19.7842	61.4722	676.202	432.368	16.3976	1.8017	529.076	129.112	21.3796	675.55	309.237	115.288	15.8107	92.9748	957.781	109.6	186.611	210.585	144.567	323.663	183.071
Lachnotalea_sp._AF33-28	91.0541	0.9751	61.6924	14.0086	30.2791	19.9884	97.037	136.36	23.0213	99.079	84.583	21.5057	6.694	4.3931	12.2963	74.7729	8.7782	31.9524	15.396	37.5804	71.2986	9.5653	143.785	18.082	57.8436	21.9277	16.328	30.2524	12.5135	59.7373	38.6572	69.149	9.2484	94.0936	3.0601	15.919	8.0935	111.995	29.78	98.1938	2.4165	10.681	162.277	169.337	46.7624	15.8321	69.3659	82.124	6.2832
Butyrivibrio_fibrisolvens	26.2222	10.3555	165.654	21.6227	16.1678	25.5211	50.7999	72.1053	51.2953	73.8468	156.974	7.4587	3.1866	2.511	28.832	16.9702	109.712	28.8834	22.1678	42.4732	15.9597	0.6658	19.7009	7.7274	56.2141	41.8279	1.4425	2.2092	0.4248	39.4245	39.5095	10.013	1.4407	1.4443	86.9567	140.544	0	12.4601	13.3147	4.1934	15.562	5.3457	125.711	8.5615	10.7201	159.359	18.7894	21.4571	33.319
Bacteroides_togonis	8.4363	0	13.5037	2.4041	8.6363	7.5352	9.8624	1.1316	0.6494	3.9039	0	0	0.8964	0	4.2925	0.4964	0	0.6314	0.7305	12.1504	0	0.1557	0	1.0235	0	0.7777	0	0.5936	1.5053	0.3615	2.1279	0	0	0	2.5764	0	0	8.4281	0.2194	0.9702	0	1.0558	0.601	0	0.6074	6.1305	0.2741	3.8884	0
Collinsella_sp._AM31-2AC	2.4024	0	0	0	0	0	0	0	0	0	0	0	0	1.6907	0	0	0.1433	0	0	0	0.545	0	0	0	0	12.5602	0	0	1.1168	0.3877	0	0	0	0	0	0.629	0	0	2.6667	0	0	0	0	0	0	0	1.5254	0	0
Coprobacillus_sp._AM37-9BH	1.414	0	0	0	0	0.1613	0	0	0	0	1.9845	0	0	0	0	0	0	0	0.1355	0.2113	0	0	0.1336	0	0	12.9833	0	0	0	0	0	0	0	0	0	0	0	0	0	0	0	0.235	0	0.3146	0	0	0	0	0
Clostridium_sp._Marseille-P7770	321.053	44.8509	94.1907	43.7369	170.748	56.9326	270.698	234.934	89.0938	215.885	149.246	247.398	8.7858	20.6845	67.5039	110.999	98.0135	79.9679	135.833	115.978	60.9639	89.5987	207.916	92.4546	165.415	73.7419	282.381	65.264	66.1231	269.409	130.417	67.6715	8.0764	108.416	53.0589	48.1057	3.2439	166.943	37.8508	69.3004	33.0099	90.5426	159.761	245.404	112.346	44.4479	45.0189	142.19	398.015
Pseudomonas_chlororaphis	0.444	0	0	0	0	0	0	0	0	0	0	0	0	0	0	0	0	0	0	0	0	0	0	0	0	0	0	0	0	0	0	0	0	0	0	0	0	0	0	0	0.4966	0.1173	0.3686	0	0	0	0	0.265	0.0473
Bacteroides_sp._AM18-9	41.1277	0.0851	65.4635	82.8827	41.8277	569.239	19.0912	2.337	73.9166	46.6062	0	0	4.5093	0	63.1291	4.8463	1.9757	4.6533	54.6172	207.779	1.7714	0.1096	0.6536	0.3363	0	20.4911	0.6875	57.2761	0.3533	1.6121	3.9354	1.2263	0	0	0.1814	0	0	10.9104	0	2.459	0	72.7444	0.4232	0	28.8856	48.997	25.6966	43.9055	9.622
Yersiniaceae_bacterium_2016Iso3	8.8428	2.8998	0	0	0	0	15.3853	11.3155	0.9741	25.1801	1.7832	22.8258	54.2336	66.5917	0.4024	13.6504	71.5553	23.2049	15.7057	33.6035	1.9599	36.1935	21.6068	5.3733	26.7893	27.2211	72.5039	81.0321	453.101	61.0074	9.1197	330.941	78.5628	84.8101	7.3427	76.9769	352.434	0	0	59.6653	87.6039	0.3168	1.8031	15.8302	17.3118	2.5079	10.2801	3.8884	30.5174
Escherichia_sp._E13S3	2.6573	5.774	0.1143	0.993	0	0	2.4603	2.9003	0	6.9069	1.6941	8.4556	28.5437	43.9989	0	4.9	19.3148	19.3895	7.908	7.114	1.1276	19.6854	9.7854	1.0757	19.1149	8.6757	25.0309	10.8428	21.0545	21.4023	0.2873	9.7014	110.231	27.9308	2.0318	1.2992	9.8844	0	0.3931	4.9967	36.2078	0.0894	0	8.1393	8.849	0.2359	0.2321	2.0055	18.5929
uncultured_Desulfovibrio_sp.	0.1846	0	0.1773	0	0.4286	0	0	0	0.2186	0	0.082	0.0788	0	0	0.142	0	0	0	0.02	0	0.2306	0.262	0.0808	0.4325	0	0.264	3.8695	0.0487	0.1647	0	0.2046	1.8246	0.0866	0.06	0	0.0494	0	0.1493	0	0	0.066	0.5217	1.6472	0	2.6847	0.295	1.2843	5.7512	0.0259
Alcaligenaceae_bacterium	0.1572	0	0	0	0	0	0	0	0	0	0.7357	0	0	0	0.166	0	0.8683	0	0	0	0.0674	0.578	0.0743	0	0	0	0.4356	0	1.2421	0	0.4703	0.3355	0	0	0.0797	0	0.1464	0	0	0	0	0.0653	3.1615	0	0	0	0.2545	0.2674	0.3338
Prevotella_sp._P5-60	0.9121	0	45.9819	0.1491	1.3393	0.0742	0.0336	0.0322	2.6031	0.0666	1.9373	8.1467	0.1784	0	0.0915	0.0423	0.0342	0	0.0831	0	0	0	0.0205	0.0873	0	12.7583	0.5403	0	0.1284	0	5.8862	0.0694	0	0	11.7927	0.05	0	1.4377	0	0	0	17.7946	2.4606	0.0161	0.1295	0.3803	0	0.3685	0
Christensenella_minuta	50.0071	10.1845	146.883	26.7238	39.7962	23.535	169.382	198.756	57.3286	87.0777	209.401	29.0997	5.1075	5.8853	112.204	40.6416	92.5705	106.614	62.3173	83.5026	42.9262	18.8503	36.3737	31.8393	109.848	49.9476	34.9526	27.9812	32.481	44.3759	145.026	18.9357	3.7394	49.5207	75.2507	153.382	46.2577	49.3074	39.2252	172.317	26.6192	24.9257	77.7993	11.3428	21.1008	210.371	29.3355	22.6683	58.7303
Prevotella_sp._CAG:255	0.6546	0	17.3927	8.2438	4.695	8.7988	7.6217	0.694	4.7794	11.8522	0.5468	0	0.9622	0	8.6387	2.4356	0	0.5809	6.4966	15.0209	0	0.2864	0	1.4124	0	5.2472	0	10.6499	0	0.3326	4.195	0	0	0.1121	3.3184	0.8094	0	14.6916	0	2.3801	0.2426	24.8673	6.0824	1.387	0.8383	32.3019	0	6.7572	1.2762
Enterobacter_ludwigii	69.7467	58.7605	41.547	98.869	117.095	178.663	82.2123	62.6719	420.619	162.489	43.8327	191.017	656.69	650.785	6.6706	98.2899	479.367	246.229	148.116	215.85	23.3297	299.24	198.58	52.5193	241.131	189.47	430.026	332.778	1652.47	364.101	84.5346	907.082	563.662	653.113	77.6866	294.218	1116.94	22.959	1.4681	194.542	613.3	68.5361	48.6352	139.29	103.656	11.1847	23.8978	22.6416	268.738
Firmicutes_bacterium_CAG:65_45_313	44.6596	10.4307	23.681	16.1029	25.4167	29.9105	35.4401	32.6153	14.736	220.729	18.8874	1.6793	6.378	1.701	17.5471	15.5448	4.2084	25.8284	39.7941	19.8208	14.8659	23.3123	63.931	49.0006	22.2355	20.7043	5.7153	9.4465	9.4212	42.672	43.9596	10.3074	35.4637	17.9087	24.2676	22.9542	17.3079	77.0841	14.4069	29.0396	14.0464	20.0117	26.5758	14.6696	48.841	53.3648	12.5912	213.258	29.9533
Burkholderia_sp._K4410.MGS-135	0.5683	0	0	0	0	0	0	0	5.1047	0	0	1.9447	0	0	0	0	0	0.1428	0	0	0	0	0	0.2271	0	0	0	0	0	0	0	0	0	0	0	0	0	0	0	0	0	0	0.601	0	0	0	0	0	0
Prevotella_lascolaii	0.1539	0	14.4422	0	63.117	50.7476	9.7582	2.9463	4641.77	49.0454	86.6699	110.332	6.6132	0	11.1767	37.1581	0.5219	0	1.268	0	0.1418	0	0	74.2843	0	190.695	49.0288	0.3864	3.5929	0.353	77.9645	0	0	0	23.3113	0.3818	0	66.9898	0	9.0518	0	268.046	172.143	0.2453	3.3609	50.0636	0	161.43	0.1003
Hafnia_unclassified	2.5677	0.817	0	0	0.1176	0	2.5041	1.9241	0	15.5082	0.7542	3.3947	8.333	9.0679	0	2.8831	13.5142	3.9402	3.0232	2.6621	0.7139	3.4778	3.6113	0.7313	3.2221	3.7816	8.5867	9.2844	65.398	7.2461	0.7912	34.6925	7.7555	10.4041	1.3247	7.5166	36.3217	0.1771	0.099	6.0574	11.0383	0.2209	0	2.4913	39.9379	0	0.8725	0	3.2988
[Clostridium]_paradoxum	0.8852	0	0	0.1464	0	0	1.3214	0	0.435	0	0	0	0	0	0	0	0	0	0	0	0	0	0	0	0	0	0	0	0	0	0	0	0	0	0.3452	0	0	0	0	0	0	0	0	0	0	0	0	0	0
Megasphaera_sp._DJF_B143	2.0469	0.0049	93.5909	0.3467	0	0	0.3129	0.6593	46.9609	1.5	174.415	0.0997	0	0.0162	0.0217	0	0.2473	0	0	2.9946	0	0.015	0.0952	203.942	0.1934	0	0	0.024	0.0203	0	6.3356	0	0.0042	1.1254	0.859	191.458	0.0478	0.0359	0	0.2975	0.0266	0	1.2568	0	0	0.442	0.2174	0	0
Citrobacter_sp._MGH100	10.8802	9.5291	0	0.3078	0	0	14.5241	4.1765	0	31.6711	6.2096	41.628	100.954	106.764	0	18.3887	127.034	38.1021	26.118	34.4485	4.7071	42.9761	34.9994	13.1558	30.0261	39.8805	68.5907	61.3238	303.77	71.7749	4.7114	163.654	92.4531	80.1681	11.8301	71.9792	203.128	1.5109	0.6179	68.1061	118.27	0.2491	0.8463	21.66	20.3357	1.3147	6.6087	3.198	43.4185
Bacteroides_sp._AM41-16	4.2809	0	0	0.0857	0	0	0.1547	0	0	1.6836	0	0	0.41	0	3.3602	0.1354	0.4715	0	2.482	13.3585	0	0	0.131	0	0	0	0.184	0	0	0	0	0.1063	0	0	0.1713	0	0	1.2098	0	0	0	0	0.1639	0	0.3572	1.8239	0	0.3388	0
Citrobacter_sp._MGH109	0.0365	0.152	0	0.0393	0	0	0.2127	0	0	8.067	0	0.2524	0.8859	0.5763	0	0.4757	17.8638	0.2836	0.2625	0.2047	0	0.3357	1.2079	0	0.3334	0.1398	0.2108	0.8534	3.7868	1.9164	0	0.0974	0.6656	0.416	0.4166	7.7985	0.2551	0	0	8.7745	2.7953	0	0	1.8286	1.7464	0	0.0493	0	0.1662
Mycobacteroides_abscessus	41.54	511.982	2136.29	285.663	1799.66	55.262	1873.21	2747.68	870.18	442.024	1427.63	202.16	19.8337	323.489	29.6979	252.341	203.055	170.229	220.164	310.552	941.318	253.33	895.488	896.863	73.2127	70.6548	372.782	378.082	286.004	13.8603	134.566	224.657	192.961	54.3791	58.9725	3037.12	323.537	114.646	215.915	208.762	37.1509	144.802	2434.56	350.383	237.319	1442.01	187.429	494.571	130.923
Prevotella_melaninogenica	18.2475	0	129.755	103.048	15.5497	64.4354	63.2618	14.2177	41.4881	58.862	3.4178	1.4957	9.2589	0.2157	49.0209	8.1397	1.2806	1.6136	20.0684	89.2717	1.113	0	0.1534	24.8478	0.1482	25.3416	2.5485	46.2711	0	1.3858	41.562	1.2122	0.3287	0.2336	33.5787	2.8103	0	70.0003	2.2426	7.8512	0.3369	58.8224	36.0951	12.5217	11.0603	117.856	4.7288	19.046	14.9675
Microbacterium_enclense	0.1446	0	0	0	0	0	0	0	0	0	0	1.9984	0	0	0	0	0	0	0	0	0	0	0.1708	0	0.33	0	0	0.4223	0	0	0	0	0	0	0	0	0	0	0	0	0.0938	0	0	0	0.216	0	0	0	0.7675
Levyella_massiliensis	17.7115	0	11.3705	50.8635	12.8547	18.9804	8.7658	0	11.3917	5.4787	0	0	1.7473	0	1.8825	8.7076	0	0	1.4239	0.8881	0.2547	0.1821	1.4038	8.9771	0	4.2446	0	8.3311	0	0	4.6217	0.634	0	0.1425	0	2.4006	0	6.744	0.2566	0	0	29.1414	2.1087	9.477	0.3552	12.3837	0	10.1055	12.0768
Kosakonia_sacchari	1.4386	2.5652	0	0	0	0	1.3959	1.3347	0	0	1.0516	8.2839	23.261	20.308	0	1.4637	14.8939	7.2614	7.3237	8.7331	0.3853	8.8134	7.2207	3.6215	5.745	8.7147	12.0389	3.676	7.9898	9.9141	0	5.7544	15.2923	14.0132	3.6466	2.0753	12.14	0	0	1.1443	16.5604	0	0	4.001	3.7614	0	0.485	0	8.1806
Massilimaliae_massiliensis	24.3162	0	0.582	0.2263	0.3762	0.3921	3.4465	3.3154	0	0	2.6081	1.0043	0.0961	0.519	0	2.5817	0	1.5345	0	1.7233	0.052	0	0.6902	0.2444	0.0373	7.4386	0.2249	0.1417	0.2396	0	3.5045	0.7334	0	0.0873	4.1507	0.8748	0.0966	0.3008	0.3319	1.7159	0.4214	1.134	0	0.3728	17.5222	0	2.9316	4.7392	7.3263
Citrobacter_gillenii	3.4697	2.7205	0	0.635	0	0	4.5845	2.1916	0	12.476	3.022	21.4248	47.3123	48.9183	0	7.3307	45.1295	15.1343	12.7337	12.686	1.4235	23.857	14.6471	2.2301	14.4878	18.2647	32.0395	26.0859	133.023	23.7636	1.3248	67.7203	36.0231	30.0914	6.3623	28.5405	84.8966	0	0	23.2534	45.7701	0	0	9.3077	8.1619	0	2.9866	1.2552	13.9932
Clostridiales_bacterium_S5-A14a	0.1299	0	0	0	0	0	0	0	0	0	0	0.5983	0	0	0	0	0	0.4034	0	0	0.2783	0.6962	0	0	0.2964	0	1.3492	0	0	0	0	0	0.1972	0	0.2469	0	0.1512	0	0	0.4132	0.0421	0	0.576	0	0.3881	0	0.1751	0	0.1477
Kocuria_rhizophila	0.0379	0.0451	0.2015	0	0	0	0	0	0	0	0.2217	1.5717	0	0	0	0.3086	0.299	2.5906	0	0	3.1269	0.6677	0.7611	0.9543	0.6056	0.0967	7.2199	0.3875	0.5614	0	1.0771	0.2022	0.3838	0.0909	0.1922	0.6562	1.8974	0.6618	3.4775	2.5932	0.1967	0	1.7933	1.3355	0	0	2.8629	0	0.7473
Subdoligranulum_sp._OF01-18	200.386	11.8061	389.089	41.1863	103.53	62.3179	405.268	468.623	114.217	298.679	913.318	56.5544	89.4555	39.008	336.138	136.821	299.563	166.729	294.825	384.355	42.4732	27.1862	116.818	486.605	171.988	152.775	133.902	278.076	21.0077	136.508	261.66	90.2597	1.2668	82.2792	337.948	379.604	12.465	395.72	52.8387	280.302	53.7683	62.5436	1123.25	486.093	567.136	1033.03	572.073	2021.97	65.4201
Bacteroides_coprophilus	135.868	0.1513	929.586	656.029	408.19	509.127	238.98	47.4568	154.808	202.735	17.2938	5.8139	22.7568	2.6648	297.968	38.7044	3.575	9.7763	200.304	286.397	4.513	6.2653	2.5432	280.248	1.394	57.0841	21.8492	331.935	1.6615	7.2795	203.913	9.4299	0.1109	7.0791	56.6615	56.8297	0	177.569	5.0399	49.3441	4.0788	1702.86	47.8381	42.8319	36.6686	627.913	26.5256	403.603	174.667
Bacteroides_sp._D20	26.1579	0.0326	104.895	189.506	91.4363	238.197	232.788	49.9565	86.1214	292.644	12.2352	1.1827	32.0456	0.6257	217.447	40.1655	3.7402	20.0348	181.681	483.548	3.6304	0.8631	0.4384	71.1784	0.5774	13.2465	7.2392	198.565	0	1.2311	88.933	9.0718	0.0185	1.5388	155.361	36.4681	0.3932	362.207	10.836	4.6025	4.215	100.394	19.6545	21.96	19.6567	750.424	4.689	229.535	15.8024
Prevotella_disiens	92.4157	0.1388	247.391	198.825	97.0411	249.734	96.3783	21.9649	105.099	70.925	13.8221	15.7858	29.8498	0.5706	132.387	36.6735	2.3405	17.455	125.288	120.132	2.9916	1.4639	1.8613	66.6705	0.4186	81.8518	19.1401	61.0591	0.7366	1.8931	42.5094	12.2258	0.8484	1.0839	259.629	12.9565	1.0298	162.668	2.0495	6.6362	1.4589	103.397	47.3625	30.4566	18.727	222.459	9.2101	82.2771	42.8464
Blautia_sp._AM23-13AC	44.703	17.4754	56.0398	9.9497	56.44	71.8734	91.9036	116.15	46.5835	53.1364	88.4419	20.1916	6.3984	8.4076	30.7709	47.8435	18.0203	116.597	45.0182	60.7591	92.4541	45.7984	81.5854	42.4015	91.8166	63.6133	81.5997	182.469	69.1133	71.5005	59.0538	130.443	8.8355	48.7084	13.9522	34.9049	6.5868	82.145	34.6285	82.388	35.5206	11.8652	81.4304	85.1542	108.689	25.8618	31.084	62.7427	65.0214
Prevotella_ihumii	12.7048	0.1105	212.256	138.234	120.492	104.534	74.2885	16.6357	228.843	89.0192	35.8584	377.711	15.2715	0.3419	38.1132	27.7545	2.8482	2.4315	31.5186	122.088	3.571	0.7428	0.5428	56.7001	0.2122	28.9819	12.7205	48.8536	0.8133	0.8977	73.7125	0.6199	0.0807	0.1667	31.2107	4.4267	0.0155	99.2217	1.4191	6.9097	0.6547	479.609	62.499	4.4797	11.9069	151.956	1.8819	27.0727	12.0045
Butyricicoccus_sp._AM28-25	17.563	99.4896	17.4945	28.2669	14.4424	49.0969	35.8745	48.041	36.4495	36.125	49.4111	4.3113	3.5863	5.2243	42.5807	17.094	6.4563	48.4276	17.6921	16.5215	10.8313	153.989	41.6006	63.93	36.7812	24.9007	7.8202	28.8816	10.4992	56.7337	75.7037	53.4749	3.0809	3.2733	57.6398	33.6695	30.9496	59.5376	23.4389	140.031	42.8999	16.1146	68.8898	37.2467	62.4396	10.2077	6.5798	60.7108	11.4482
Anaerococcus_sp._Marseille-P3915	0.0247	0	0	0	0	0	0	0	0	0	0	0.455	0	0	0	0	3.9932	0.1534	0	0	0.3174	0	0	0	0	0	0.171	0.1442	0	0	0.0739	0	0	0.0592	0.0626	0	0	0	0	0	0.032	0	0	0.0916	0.0738	0	0	0.105	0
Enterobacter_huaxiensis	5.1095	3.2761	0	0.4903	0.0469	0.0583	11.1528	7.7782	0	28.9346	3.1001	19.1711	49.127	47.3693	0	8.2441	79.1526	15.5481	9.3542	13.3219	2.4881	17.4037	17.7885	6.6758	18.3822	17.8901	23.6335	43.5599	123.893	27.4662	1.1556	78.4155	42.5668	115.874	5.8113	40.9105	84.3055	0.2684	0.0337	26.7567	48.1509	1.4818	0.4083	13.8235	10.0018	0.1713	1.2394	2.7582	17.5524
Pseudobutyrivibrio_ruminis	0.8697	0.3244	0	0.4192	0.2184	0	0	0	0.3487	0	0	0	0	2.1754	0	11.5055	0.1076	0.1695	0.3364	0	0	0	0	1.6487	33.5025	16.8441	0	0	9.2955	1.553	1.3875	2.1103	0	8.8005	0	0	0	1.0719	0	6.5118	0.0708	0.2835	0	1.8215	0.897	0	12.5121	92.5651	0.0828
Escherichia_sp._R16	1.121	0	0.1527	0.3708	0	0	0	0	0	14.1308	2.1851	9.9305	22.1387	10.1675	0	1.8248	53.9597	4.3747	0.482	33.5008	4.5569	16.7283	1.2899	0.1447	3.6075	0.6598	2.1233	12.0869	8.9394	0.7668	0	0	0.4656	5.6512	0.0729	1.9902	18.1329	0.2509	0.8065	6.493	65.8756	0	0.17	33.2545	1.1165	1.1032	0.2326	0	5.361
Murimonas_intestini	1.199	0.1688	0.825	0.2154	0	0.1904	3.121	1.6968	0.3599	0.242	2.4577	0	0.5634	0.7783	0.0372	0.589	0	0.3123	0.4051	1.721	0	1.0496	0.0333	5.9322	0.0964	3.2906	0	1.7314	0.0701	0.526	0.4473	1.9417	1.236	0	2.4348	2.3516	0.1679	3.0361	0.4074	0.4635	0.2593	0.6581	1.2527	2.5769	11.2541	1.7738	2.5601	16.9789	5.0044
Mammalian_rubulavirus_5	11.4741	17.8267	64.1692	0	0	0	0	0	0	0	0	0	0	0	0	0	0	0	0.1018	0	0	0	0	0	0	0	0	0	0	0	0	0	0	0	0	0	0	0	0	0	0	0	0	0	0	0.1768	0	0.1807	0
Enterococcaceae_unclassified	0.0762	0	0	0	0	0	0	0	0	0	0	0.1756	0	0	0	0	8.2679	0	0	0	0	0	0.1801	0	0	0	0	0	0	0	0.57	0	0.656	0	0	0	0	0	0	0	0	0	0	0	0	0	0	0	0
Bacteroides_bouchesdurhonensis	249.792	0.0926	248.361	280.602	233.901	106.123	130.87	15.2316	1365.81	176.002	20.1007	48.0615	60.8694	1.2481	126.668	63.4013	4.1783	2.8497	53.1267	288.81	1.5559	0.4609	0.56	103.852	0.4664	40.8874	9.532	107.936	1.1247	1.2119	119.949	1.1935	0	0.8805	81.6881	9.6435	0.1322	238.048	1.8576	1.9575	1.7476	175.279	330.687	34.1391	12.1514	208.759	4.6772	121.4	9.8325
Bifidobacterium_ruminantium	8.2762	3.3695	12.9523	0.0456	0.6348	0.0604	0.0711	1.3278	0	3.9165	0	184.506	0.1833	0.3536	0.5309	0.6885	8.4352	229.424	6.863	4.0483	31.3593	0.1273	0.1201	0.1067	8.9191	38.927	0.1467	0	0.5596	115.796	0.9689	0.3463	0.2807	0.4687	0.1611	6.1852	0.1118	0	461.106	16.1054	0.0423	0.1245	6.1105	0.7536	18.6956	0.3605	1.9579	1.1754	129.921
Ruminococcus_sp._AM50-15BH	3.274	4.8935	12.5409	4.7413	5.5475	5.2737	15.7844	13.3374	3.6639	16.7769	10.6874	4.3891	1.0048	3.6414	47.3077	5.2274	19.5561	14.2173	2.9248	9.2885	13.8157	8.1906	26.7801	49.3199	8.1172	5.6589	3.2666	6.319	13.822	12.1538	26.9181	9.9457	11.0785	2.2303	10.5872	6.7282	0	40.4657	45.1445	18.2511	7.7059	2.1205	43.8309	2.9462	10.3004	1.4717	50.669	2.3594	23.4455
Barnesiella_viscericola	1.7911	0	12.2315	0.415	0	0	0.2497	0.289	2.8775	0.9885	0	0	0.0398	0	3.2268	0	0	0	2.3121	3.1247	0.145	0	0	6.8028	0	0.6564	0	1.5032	0	0.1144	19.0509	0	0	0	0.2745	0.3713	0	0	0	0	0	0.6684	1.0011	0	0.769	12.5882	0	1.641	0.3903
Alistipes_sp._CAG:53	0.5053	0	21.2211	4.9559	0.2913	1.9473	26.8556	11.5321	3.6126	21.1688	8.2338	5.6656	4.5791	0	43.3233	5.7679	3.157	2.9374	10.3608	79.9921	1.3258	0	0	0	0	1.0744	1.0445	10.2384	0	1.0512	39.8058	0	0	0.2473	6.5581	2.1389	0	47.1834	4.1388	0.3281	0.0978	1.5989	3.6132	0.0323	3.8696	26.4954	0.6102	15.3983	1.0528
Bacteroides_intestinalis_CAG:315	0.0512	0	7.6172	10.6772	5.1405	7.1523	33.7769	5.1291	1.6353	41.2901	0.5987	0	2.4832	0	12.8364	1	1.2114	3.1802	25.754	71.7134	0	0	0.1209	7.9899	0	0.7834	0	15.8463	0	0.5462	9.4924	0	0	0	8.8236	5.4646	0	16.0857	2.2098	0	0.1992	15.5279	0	0	0	133.609	0.6903	25.8943	0.0776
Lachnospiraceae_bacterium_AM10-38	1.803	0.5298	0.2667	0.7871	0.5461	9.2698	1.3461	0.858	1.231	1.1902	1.0481	0.8855	0.206	0.2846	12.2388	1.1787	0.7599	3.2846	3.2828	1.2335	1.5231	7.9204	2.7753	2.7646	2.2628	11.1661	1.0075	1.7659	0.6946	2.507	3.1207	1.5449	1.2598	1.856	1.9087	3.9496	0.2042	1.1803	0.2495	3.3747	1.9302	0.1601	7.1827	0.7558	6.3634	0.3169	0.8056	0	7.7912
Rikenellaceae_unclassified	0.0362	0	3.6502	1.3992	0.5585	16.1833	6.314	0.9391	1.1548	0.5554	0.2114	0	0.1594	0	0	0	0.1426	0	0.0866	0.8103	0	0	0	0	0	0	0	0.2111	0	0	0.6487	0	0	0	0	0	0	0.9466	0	0	0	4.1309	0.8551	0	0.108	0.3964	0	21.3595	0.2193
Alloscardovia_omnicolens	32.514	0.0629	0	0	0	0	0.2054	0.6398	0	0	0	1.1024	0	0	0.2116	0.1083	0	0.5778	0	0	0.1134	1.6306	0	0	0.2744	0	4.5071	0	0.2613	0	0.1583	0	0.0536	0.0635	0.1342	0.6152	1.4505	0	0	2.413	0.0687	0	0.313	0.0981	0.1989	0	0.1428	0.5657	0.7074
Clostridiales_bacterium_CCNA10	53.0059	13.4968	78.1621	22.2946	139.538	7.607	101.583	124.172	113.073	93.9623	66.7307	36.4115	2.8934	1.6249	65.9284	21.8383	15.0427	22.9191	37.8039	90.8966	31.7792	20.7318	22.3418	23.2522	150.21	26.1278	16.5068	23.7153	46.0752	49.278	66.1345	110.269	0.6107	13.8576	36.7121	28.9664	0.2395	234.127	77.0919	34.0723	16.3571	30.4463	165.028	53.298	109.649	18.2253	7.4964	101.502	55.4263
Flavonifractor_sp._An4	1.3304	0.0859	7.6362	3.3792	2.7924	1.5419	3.7829	1.0732	3.9763	10.142	16.896	0.8327	0.2084	0	4.3476	1.5301	5.058	4.4916	4.4797	1.6673	0.6196	7.1978	0.5123	6.3107	9.4044	3.8727	0	1.1503	2.1416	3.2146	9.718	8.1903	0.1464	0.1184	0.9313	3.8136	0	6.7022	1.466	10.1217	2.4302	1.5281	16.1299	1.7915	25.5367	1.0627	4.5291	3.2791	6.359
Akkermansia_unclassified	0.2004	0	0	0	0	0	0	0	0	0	0	0	0	0	0	0	0	0	0	9.3569	0	0	0	0	0	0	0	0	0	0	1.1986	0	0	2.4023	0	0	0	0	0	0	0	0	0	0	0	0	0	14.0538	0
Blautia_sp._AM47-4	53.2142	39.0196	99.6379	30.704	135.103	151.424	198.947	267.281	64.5438	280.749	181.112	44.0989	25.6721	45.0341	101.509	86.7812	44.6945	234.552	124.82	101.044	196.554	59.361	269.183	114.088	178.663	305.501	110.752	125.629	61.9828	129.054	104.919	183.242	17.0931	105.443	92.2474	170.591	27.1759	307.788	63.7013	283.717	52.702	53.3528	227.223	144.325	181.563	75.94	111.11	329.203	147.876
Ornithobacterium_rhinotracheale	124.152	0.3674	785.883	287.726	117.26	550.262	348.366	72.8413	143.751	201.931	17.2213	1.5639	48.8709	0.363	203.104	49.7191	7.4759	11.8815	91.3858	481.807	4.4092	1.3879	1.0117	42.7637	0.9378	112.664	16.3837	154.41	1.0956	5.7436	174.467	10.8014	0.6147	1.2094	122.32	16.3756	0.6033	302.672	5.2644	25.9579	2.533	276.743	93.172	34.9386	54.9102	192.224	9.0452	61.273	32.7399
Prevotella_timonensis	0.6036	0.0813	330.34	71.7226	28.8043	125.641	168.851	40.7524	89.2395	64.9203	2.8009	0.5516	16.4942	0.1704	52.7349	8.4094	5.3197	4.3568	22.5385	225.442	2.7586	0.1572	0.0808	12.746	0.1561	51.9193	4.5806	60.2712	0	2.312	36.8346	2.3719	0.3117	0.3691	33.1506	3.7507	0.0796	131.388	3.1013	18.1776	0.8875	130.49	47.7422	0.3172	19.1163	91.7014	3.414	31.0154	10.0271
Bacillus_cereus	11.7566	8.6065	6.2635	0.3427	5.8784	0.4444	6.494	1.3814	0	5.0272	22.8084	64.6312	58.1878	91.0062	3.5296	10.9719	121.526	27.196	16.9998	7.646	31.3274	34.6461	51.4677	16.8969	27.9356	21.4658	46.1414	7.3579	23.4598	37.021	21.4518	17.7937	69.8818	42.7981	3.8725	12.8316	30.4914	1.0712	11.3457	60.4974	56.3987	0.1656	36.4808	14.9964	24.6888	2.8907	2.3341	12.0354	26.1973
Clostridium_sp._AF46-9NS	2.6658	8.3371	15.7225	2.5246	18.6795	13.2381	50.5991	48.9189	6.3593	42.477	15.6873	4.5285	17.5193	2.1796	17.5227	3.2829	7.4718	15.6205	3.6464	56.2012	7.7766	0.7985	15.0587	14.2018	36.3443	7.7587	5.9438	8.6462	4.2844	7.4689	32.4086	22.1924	5.4848	12.1243	3.0466	10.2826	0	57.2034	0.2226	3.0993	0	6.4731	40.3381	17.7471	9.7492	6.5076	0	103.852	0.6622
Clostridium_celatum	1.1574	0.908	1.6493	1.9256	7.8546	0.849	9.0725	4.2937	1.4757	4.1097	7.3472	2.9188	0.5103	1.4957	1.283	1.9805	0.4026	0.84	4.8311	3.3566	2.8694	15.9079	109.466	4.2231	4.1976	6.6692	5.2049	0.4056	11.0601	8.3974	4.2014	1.8517	2.1951	0.1223	7.2574	4.0444	0.9153	0.9091	6.6402	48.3478	3.5251	1.3796	1.386	9.269	54.3859	0	17.3966	3.3552	3.1071
Culturomica_massiliensis	1.4972	0	35.2958	21.1017	0	5.1587	0	0	0	0	2.3059	0.1162	1.3124	0	0	1.0498	0	0	38.2252	32.7012	0	0	0	0	0	1.4365	0	0.4452	0	0	16.9888	0	0	0	0	0	0	0	0	0	0.3137	0.5765	4.7149	0.0468	0	0	0.1361	4.2497	0
Kosakonia_radicincitans	0.8251	0.7356	0	0.4435	0	0	8.0059	4.5928	0	20.5988	0	0.9502	0	4.4533	0	0.6716	78.9124	1.2814	0	6.1645	1.7677	4.7388	2.4361	0	2.3535	4.7351	39.5231	4.819	21.3844	2.2011	0	0	0.6265	9.8916	13.0713	11.9023	1.4406	0	0.4452	13.7821	4.2807	0	0	22.1822	0.6164	0	1.1127	0	14.3883
Bacteroides_sp._3_1_23	102.34	0.3572	409.497	1369.34	464.41	721.145	311.959	66.1791	402.049	397.511	21.1422	11.4042	203.46	6.967	787.363	176.575	9.5631	19.4015	180.837	1850.92	7.4888	5.9324	13.8712	177.19	13.2945	144.611	7.0721	364.43	3.2523	4.5953	220.434	107.656	4.6883	9.3806	474.483	53.2661	6.3901	241.921	16.1093	23.0915	19.2782	144.804	58.1601	1202.99	43.3165	1634.74	17.1085	422.25	83.1254
Subdoligranulum_sp._AF14-43	120.662	36.6608	58.061	8.1109	24.3637	13.2985	59.9893	65.2644	27.4969	93.0196	580.354	24.183	30.9518	25.5445	300.665	45.5223	278.073	86.0302	86.1787	375.775	65.5541	109.183	81.9818	382.069	11.6421	11.8083	10.7293	167.539	35.1573	78.2246	119.495	33.9461	4.6227	48.4397	295.518	199.073	8.4457	229.968	70.1824	187.535	27.294	10.9381	744.215	506.694	336.78	89.9083	549.145	357.09	10.6587
Clostridia_bacterium	79.9085	275.969	134.252	9.3607	27.6301	37.0399	120.733	51.9308	20.9566	29.8059	43.4064	39.4929	5.0478	1.4928	274.447	17.7291	12.6782	46.8123	20.3845	32.1612	29.106	13.5924	29.2546	30.8963	8.2103	31.3341	9.2851	13.3024	19.817	11.5367	42.1877	5.226	1.1236	28.3627	55.4521	20.6248	1.4253	125.251	51.0912	14.9071	2.8686	20.1159	119.587	28.8218	42.6732	28.2793	32.661	43.8742	52.8825
Bacteroides_sp._AM25-34	40.9575	0	125.019	135.844	6.573	32.9864	30.4633	7.5158	131.697	26.3417	0.4961	1.1318	6.8199	0.1159	3.1408	2.4054	0.4697	0.1084	17.0123	107.318	0.6181	0.5725	0	1.0557	0	13.7548	0.4766	24.418	1.2569	1.6795	7.5151	0.019	0	0.0085	0.2151	0.1601	0	11.2047	1.6798	2.7757	0.1558	0.6826	0.5016	0.1846	8.6962	14.2122	13.0735	22.5721	0.6205
Streptococcus_sp._HMSC078H03	5.1693	2.9475	1.5865	0.1914	0	0.5829	1.0165	0.45	2.0387	0.3238	22.3294	40.6145	0.4832	1.0902	1.0327	0.5874	9.145	15.0535	0.3211	19.2408	1.2692	8.4971	26.0361	33.6924	12.5753	0.5052	6.402	1.3019	3.9934	0.0539	21.8167	89.7678	0.6247	0.0299	0.3641	27.1893	0.619	0.3366	9.6636	45.0153	2.7487	0.2328	69.4116	5.2532	4.8397	2.7461	115.195	25.5988	25.2869
Ruminococcus_sp._AM36-17	3.1859	4.4008	2.2145	5.846	5.7692	2.7858	6.1552	6.9887	1.4691	11.0916	7.9908	1.3058	0.4544	0.0654	31.8813	0.6785	18.1079	5.5769	3.2735	3.7759	5.7417	6.8573	9.8741	27.6901	4.67	1.4398	3.6998	1.9682	3.7615	9.1041	7.7393	4.562	6.9336	0.5783	5.5059	8.6674	0	31.6447	35.1843	21.4663	4.8565	0.4687	17.6786	1.7629	10.6343	1.0248	35.0272	3.5381	6.359
Aspergillus_carbonarius	34.6599	48.2147	160.305	0.237	0.2938	0.2683	0.7746	0.4161	1.5549	0.7464	0	0	0	0	0	0	0	0	0.2916	0	0	0	0	0	0.0915	0	0	0	0	0	0	0.415	0	0.0182	0.1402	0.0439	0	0.0664	0.0328	0	0.0671	0.1781	0	0.1984	0.0455	0.6344	0.1231	0.3643	0.0231
Streptococcus_halitosis	0.0461	0	0	0	0	0	0	0	0	0	1.0793	5.7388	0	0	0	0	0.9099	0	0	0	0.0989	0	1.3078	0.4646	0	0	0.3195	0.2695	0.2278	0	0.138	0.6152	0.0467	0.2213	0.3509	0.5325	0.2148	0	0	0.8808	0.3591	0	0.8185	0.0855	0.4136	0	0.8711	0	0.7696
Caecibacter_massiliensis	2.3241	80.1528	69.4405	0.2673	0	0	0	0.0346	0	0.1006	0.1091	2.1255	0	0.0187	0	0.0304	0.2075	0.0349	0.3023	2.7926	0.0241	0	0.3521	223.807	0	0	0.025	0	0	0.0332	11.7281	0	0	0.2041	0.4371	0.1775	0	0	0.0201	1.5659	0	0	2.179	0.0208	0	0	0.3318	0	0.1031
Clostridium_sp._28_12	2.8691	0	0.2427	7.3447	2.9473	0.6217	0.8462	0	0.9286	0.6978	0	0.0645	1.1384	0	4.3161	0	0	0	0.6964	0.2715	0	0.0557	0	0	0	0.3707	0.5249	1.6871	0	0.1939	0.5434	0.0969	0	0.2178	0.0921	0	0	0.4395	0.2353	0	0.1534	0.0755	0.6446	0	0.2061	2.391	0	1.8535	1.3776
Senegalimassilia_unclassified	0.282	0	0	0	0	0	0	0	0	0	0.146	0.5347	0.2679	0	0	0	4.6812	0	0	0	0	0	0	3.8426	0.151	0	0	0	0	0	4.6956	0	0	0	0	0	0	1.8085	0	1.5844	0.0858	0	32.0277	0	0	0.5474	0	0.2812	0
Streptococcus_porci	0.1575	0	0	0	0	0	0	0	0	0	0.235	20.9147	0	0	0.3669	0	0	0	0.1846	0	1.8087	0	1.903	29.1962	0	0	0.5337	0	0	0	1.2373	0	0	0	0	1.4883	0.3236	0.6727	0	3.6984	0.4627	0	0.931	0.1429	0	0	0	0	0
Solobacterium_moorei	147.458	44.1005	23.9061	3.6999	26.7293	85.3127	63.1693	60.034	6.8677	129.785	58.4152	318.535	311.105	354.973	121.453	159.183	476.917	210.33	91.7152	85.774	808.602	625.911	302.656	107.012	254.428	140.922	3159.16	428.479	2485.13	192.22	137.302	1430.41	504.871	404.634	155.4	438.736	2176.97	19.089	181.53	1013.22	363.511	7.3629	223.219	131.139	202.815	21.1554	282.873	16.4388	503.075
Anaeromassilibacillus_sp._Marseille-P4683	107.462	25.5093	115.842	34.0265	143.813	156.91	192.417	289.884	125.045	193.076	170.418	52.2547	19.4344	45.1793	128.351	95.1635	29.3016	230.826	138.97	109.387	156.951	69.0374	245.942	91.4219	147.481	231.037	161.783	209.579	55.7264	161.439	127.191	183.589	10.422	90.9693	104.505	169.418	20.4024	367.304	57.6628	397.774	55.4129	39.7079	318.823	199.759	184.45	80.2576	94.6023	286.598	178.932
Eubacterium_sp._CAG76_36_125	7.7529	236.26	23.7804	78.7054	97.9454	2.331	69.1561	37.8914	127.382	13.711	16.3726	30.6125	1.1122	21.4478	5.6346	14.8648	3.3735	3.5201	7.1493	2.8343	234.583	5.0307	112.452	102.07	307.533	7.1359	20.9583	4.9473	47.7868	19.2969	42.1052	14.8563	13.44	10.1065	7.9665	24.0641	0.0371	7.4245	16.032	49.1122	2.9122	315.244	319.372	20.2489	22.189	6.5747	20.7298	29.1365	27.944
Coriobacteriaceae_bacterium_EMTCatB1	0.1131	0	0	0	0.3495	0	5.2684	1.3433	0	2.8675	0	0	0.266	0	0	0.2946	1.0707	0	0	0	0	0	0	0	0	0	0	0	0	0	0.0677	0	0	0	0	0	0	0	0	0	0	0	0	0	0	0	0	0	0
Selenomonas_ruminantium	3.3033	4.1929	0	0.3129	0.7354	0	0.4927	0.3877	4.9786	0.2438	0.4797	0	0.1809	0.0681	1.7321	35.0512	0.647	5.2231	5.6987	0	0.1757	3.9196	0	0	0.4315	1.9876	0.2412	0.4791	3.8407	0.2918	0.1898	1.1421	0.0415	0.3085	0.4575	28.6352	0	1.2529	2.5942	0.3407	0	0.819	5.0171	0.726	0.7353	4.2727	1.1272	3.5821	0.1624
Weissella_unclassified	1.4425	1.6282	0.2625	0	0.0937	0	0.3834	0	0.6311	1.3279	6.8417	7.1545	2.0833	0.5952	5.4133	50.2785	1.4391	7.585	4.0434	0.6492	4.4411	6.3138	8.0438	61.629	5.6931	2.3322	3.7863	2.712	16.6073	2.2428	4.5146	7.2966	0.4283	0.7425	0.5312	12.9414	0	10.1191	4.7725	1.069	17.7341	1.3339	0.287	2.5275	14.9955	0	0.8434	5.1444	0.3838
Pseudoflavonifractor_sp._An184	11.8021	0.1004	24.4548	1.4093	6.0161	5.4115	52.147	74.9605	2.3862	42.038	10.7482	4.9807	2.3235	0.2092	6.9087	9.688	5.8542	120.93	2.7872	12.4347	11.1152	2.8601	17.5322	5.6488	26.4088	16.1136	0.9757	1.0907	1.2292	11.1486	10.0494	11.9421	2.9836	0	1.0519	1.4342	0.0966	13.0485	1.1574	0.1344	13.2438	5.9904	27.1602	9.4668	7.8155	5.4645	0.6445	20.8856	34.2727
Salmonella_unclassified	9.3277	7.0448	0	0.1508	0	0.2	7.0773	2.993	0	6.3302	1.6405	19.3036	49.3795	56.3726	0	4.8521	16.0428	13.6151	16.1294	10.0867	1.1269	14.7156	25.2619	5.6496	33.2883	25.4012	8.8237	1.7409	15.7532	28.1258	0.4195	24.4994	76.6088	38.7184	2.1332	2.1246	38.1218	0.153	0	1.0041	51.3501	0	0	5.7865	7.2299	0.1923	1.4187	1.7887	17.4943
Bacteroidetes_unclassified	437.274	0.8546	2920.01	1153.39	1144.27	2333.2	1265.92	250.666	1337.84	1493.92	55.7262	15.3837	218.108	7.8705	465.5	309.055	68.0124	75.6234	339.375	2675.49	15.0833	19.2878	1.3009	270.986	7.3498	691.458	83.0084	599.769	3.8442	15.3736	919.491	15.7119	1.1733	1.9459	608.832	85.3945	0.8512	1618.32	36.767	172.713	17.4702	2823.79	534.29	191.736	200.526	3164.53	52.2475	434.069	391.723
Agathobaculum_butyriciproducens	22.3318	65.6376	268.076	66.6935	102.676	118.771	322.175	295.441	173.49	282.98	161.48	49.2493	16.3833	27.6969	123.507	146.518	324.449	304.911	239.435	265.734	106.8	114.533	186.692	226.994	289.513	246.009	78.3966	131.695	52.4323	114.164	172.628	207.869	52.2325	28.3399	218.654	108.992	12.3107	345.793	125.521	253.037	82.9125	54.3981	421.357	126.661	335.519	101.564	82.9092	358.776	167.578
Nitrosomonas_ureae	19.0038	22.3218	114.215	59.1044	30.5817	3.8704	65.8554	22.2478	106.959	79.9416	11.2456	12.506	16.1284	6.0115	1.7914	21.7285	79.8571	19.3247	5.4198	7.6063	2.6658	20.4431	4.0077	2.8476	4.1301	9.5211	6.7894	58.7992	27.3628	8.6504	4.398	15.6854	7.2145	35.8014	3.154	125.973	14.483	7.405	10.4986	46.0673	19.5136	26.0862	101.671	5.2433	60.503	5.5821	3.0509	2.8849	10.9779
Eubacterium_sp._AM46-8	4.3716	10.8137	50.9492	13.8383	19.9225	5.1458	44.765	21.5959	20.5475	27.4383	42.949	7.2214	5.1895	6.5799	9.457	14.5023	12.0562	42.7074	14.3663	17.175	7.5269	18.3932	4.7923	15.8873	51.2246	32.9897	7.7439	1.8036	10.0489	5.6145	9.803	8.0235	8.6034	1.6159	178.351	21.1753	12.1431	58.0782	3.3151	439.193	9.0802	22.57	34.42	17.311	26.0147	17.5312	14.8781	32.996	3.001
Massilioclostridium_coli	2.1842	74.4936	16.0871	1.0996	3.4345	6.5785	7.2361	7.2957	3.095	31.4955	10.4617	2.1445	2.169	1.3909	3.5514	4.2196	5.2523	16.6411	1.4375	3.7802	17.5854	2.8515	65.1835	5.5328	19.5325	16.7075	0.4421	2.0794	2.9664	3.0106	6.3597	16.7766	1.3132	3.1884	27.8552	5.801	4.2017	7.1081	2.0232	89.6477	14.5027	1.2025	4.4555	3.6482	82.7016	30.0182	7.1131	14.7101	11.5388
Clostridium_sp._CAG:62	10.4348	35.3939	5.0589	6.4086	74.3952	9.5986	2.6054	5.7504	4.3527	27.2434	8.0292	16.4305	0.2062	2.5624	9.3622	19.0637	3.6737	24.8705	21.1713	16.1057	9.8883	1.4818	10.7382	0.6396	6.1487	2.4533	99.9977	10.5231	5.6879	10.085	2.7616	23.716	0	9.2087	45.6194	13.9015	0	25.8749	0.2128	185.845	10.0062	1.6411	58.7804	26.5953	24.4953	9.198	80.3902	3.3512	0.2127
Serratia_marcescens	3.2499	0.2481	13.9202	0	10.0079	0	0.9234	0.3098	0	4.2711	0.4883	2.9193	0.6136	7.0715	0	2.4464	2.3626	1.4263	1.8002	0	0	0	0.8874	0.4204	2.191	0	2.3129	17.1495	37.5075	1.2621	2.3722	1.5585	0.1268	6.6563	0.4972	0.1204	25.364	0	0	9.5631	0.5577	0	0	0	0.2869	0	0.1126	0	5.3174
Fretibacterium_fastidiosum	3.9921	0	0	0.5935	0.7255	0	0.3241	0.5422	0.2667	0	0	0	0	0	0	0	0	0	0.1	0	0	0	0.0493	0	0.1941	0	0	0	0	0	0	0	0	0	0.4389	0.1204	0	0	0	0	0	0	0.512	0	0	0	0.2252	0	0
Clostridiales_bacterium_38-18	0.8251	0	0	0	0	0	0	0	1.0543	0	0	0	0	0	0	0	0	0	0	0	0	0	0	0	0	0	0	0	0	0	0	0	0	0	0	0	0	0	0	0	0	0	0	0	0	0	0	0	0
Bacteroides_sp._3_1_40A	1499.36	3.6465	1917.37	3844.58	1626.27	1315.52	573.028	99.5956	1344.11	474.476	76.3469	9.9689	219.701	4.1226	877.918	706.053	6.8901	17.9056	368.221	152.051	7.5123	20.0475	50.2777	492.127	2.5798	268.856	74.0992	873.453	9.0836	9.3693	252.211	41.1521	0.1183	49.4304	68.4642	123.587	3.7671	218.16	17.8536	17.8941	27.9053	2560.68	143.983	415.062	74.3044	896.233	7.0741	826.238	990.921
Prevotella_marshii	137.797	0.0567	376.539	173.119	277.653	525.694	136.133	22.581	230.233	288.899	15.4114	0.3561	43.7643	1.3342	79.3816	72.9642	10.7962	21.1252	91.2352	388.602	4.0728	5.5318	0.7532	38.8774	1.5012	211.494	20.0202	61.5039	0.7294	2.1736	174.244	6.6147	0.3982	0.3143	216.055	13.2971	0.2766	242.69	6.9344	20.8993	4.3689	574.133	56.0757	59.8973	22.478	653.264	7.3838	81.1086	90.863
Enterobacter_sp._RVSM5a	0.0188	0	0	0	0	0	7.0057	6.0006	0	0	0	0	0	0.1249	0	0.3061	0.1483	0	0	0	0.0403	0	0.977	0	0.3432	0	0	0.9334	0.6497	0.6688	0.0562	0	0	12.285	0.143	0.0542	0	0	0	0	1.1218	0	0	0	0	0	0	0	0
Raoultella_phage_Ro1	0.2226	0	0	0	0	0.3174	0	0.4131	0	0	0	0	0	0	0	0	0.439	0	0	0	0	0	0	5.6048	0	0.2839	1.5419	0	0	0	0.6659	0	0	0.1335	0	0	0	0	0.2403	0.7084	0.8663	0	0	0	0	0	0.6005	0.4732	0.844
Flavonifractor_sp._An9	2.2782	28.3912	1.6275	1.3876	1.3879	1.4414	3.705	3.7506	4.4404	2.9167	1.7069	1.2339	0	0.0607	6.5426	5.7491	0.2416	15.733	0.9166	1.0051	1.6255	41.3739	3.9879	3.2667	0	1.1177	1.7989	1.1627	2.5646	1.6168	2.1867	1.039	0	0.3551	5.5255	0.4985	4.2327	3.5917	123.612	2.5955	1.8738	0.0759	1.752	1.6261	2.6476	2.81	3.235	3.3068	9.0108
Pseudomonas_graminis	2.3458	0	1.0924	0.104	2.0548	0.5516	4.5524	6.9103	0.618	0	11.6676	8.8845	0	0	1.532	10.2947	0	2.2535	0.927	0	7.0983	1.3334	15.9083	0.2435	5.5462	0	4.4383	2.8249	5.3128	2.4085	1.1573	0	0	7.9585	0	2.8257	0	1.2665	0.1044	3.2317	0	0.7034	19.091	20.088	5.492	0.2652	0	0	0.5501
Dialister_invisus	10.55	0.447	8.7123	0.1795	1.0569	0.5445	10.0323	17.3642	10.135	6.9813	42.4104	10.2139	18.7236	9.9015	1.5456	1.3965	9.4778	5.0356	2834.53	10.8499	10894.5	8.9268	5.0882	6.7396	3.8697	421.826	6.2829	499.415	6.8453	5.9621	16.0798	3246.59	11.1658	9.7719	2.0758	41.3372	2.7232	2.1215	2.472	4.2557	6.3491	57.7146	6.477	7.5877	5.9482	36.119	2.4929	9.7347	14.3543
Gemmiger_formicilis	105.764	82.593	424.745	77.6184	268.457	149.299	803.567	946.588	160.769	437.71	456.683	103.491	316.331	159.217	153.661	232.289	743.268	577.221	267.515	528.58	253.763	242.764	175.534	285.608	275.699	290.361	104.771	156.962	122.669	322.836	384.985	248.798	74.0469	160.912	178.363	198.339	48.8356	561.947	135.756	262.28	250.914	149.969	399.81	136.68	356.148	220.578	61.9399	840.624	227.465
Citrobacter_freundii	101.85	82.6524	3.8207	8.4242	4.1588	1.0751	108.664	83.7521	2.7754	557.797	47.8748	325.142	1018.65	1009.16	1.4054	148.722	1670.27	369.449	211.496	272.219	35.0236	444.255	317.058	88.9175	347.062	334.154	534.34	452.269	2063.05	627.904	42.039	1230.53	811.996	803.731	118.515	726.112	1487.94	5.623	5.8892	690.672	1039.94	5.135	6.3994	283.858	230.158	16.6174	31.4234	34.0352	337.594
Enterobacter_unclassified	31.5887	19.0719	1.7236	3.5072	2.6224	0.5127	312.374	197.363	1.2659	128.095	9.1096	67.4294	169.956	187.592	9.4142	59.7333	381.584	77.851	60.4811	44.6137	21.4083	69.1929	114.536	13.04	72.5898	75.0302	84.758	326.913	430.59	137.588	15.9498	278.584	138.347	1779.29	31.8153	224.99	219.684	2.3116	7.7922	94.6012	216.248	0.8859	1.7858	54.9445	37.7998	1.9965	23.1658	10.9737	62.9179
Sutterella_sp._AM11-39	44.7924	10.1927	204.152	131.452	187.327	160.186	69.4585	11.9104	120.68	107.167	6.4083	9.0965	16.3224	1.3346	64.1348	19.9792	9.8492	3.8576	31.9767	91.3602	3.6803	12.9412	0.9149	26.636	0.1667	42.7487	3.7358	93.762	0.3606	2.3386	95.2405	2.5325	1.8661	4.7773	31.48	5.3183	0	92.7788	10.2284	7.9028	2.8075	195.828	38.015	13.1946	19.47	146.442	20.9493	71.1218	25.984
Bacteroides_fluxus	14.8068	0	69.704	38.4136	5.6438	244.033	162.222	34.1678	43.8093	89.3276	4.6585	2.4554	17.6478	0.0689	55.227	14.6711	3.7372	2.8423	65.8664	406.766	0.725	0.2903	1.1687	66.0464	0	42.6291	0.4937	54.1872	0.717	0.5524	173.888	1.9771	0.4614	0.4293	85.603	50.0212	0	83.3375	3.9085	66.7402	1.4548	62.1696	57.1879	0.1464	5.2092	186.85	10.8349	60.3401	20.9488
Achromobacter_ruhlandii	0.2262	0	0	0	0	0	0	0	0	0	0	0	0	0	0	0	0	0	0	0	0	0	0	0	0	0	0	0	0	0	0	0	0	0	0	0	0	0	0	0	0	0	0	0	0	0	0	0	0
Fusicatenibacter_sp._2789STDY5834925	5.0996	130.023	0.2982	0.7918	3.0337	0.4611	2.9592	1.2353	3.1346	8.2767	20.6213	0	0.2648	0.5856	0.9252	8.6909	0.7726	9.1718	51.7431	1.519	1.7648	19.1811	0	11.6234	15.4669	46.1308	3.4971	0.2996	1.3315	1.7927	23.9733	2.4234	0.6537	0.2281	0	20.0294	16.673	2.2786	2.0296	4.737	0.0658	6.919	2.9942	20.8146	8.6293	3.8018	0.2852	0	0.1188
Ruminiclostridium_josui	10.2744	0	0	0.3025	0	0	0	0	1.2499	0.3521	0.8042	0	0	0	0	0	0	0	0.0928	0	0	0	0.1083	0	0.0884	0	0	0	0	0	0	0	0	0	0.8888	0	0	0	0	0	0	0	0	0	0.8272	0	0.0523	0	0
Pusillimonas_sp._JR1/69-2-13	0.0572	0	0	0	0	0	0	0	0	0	0	0	0	0	0	0	0	0	0	0	0	0	0	0	0	0	0	0	0	0	0	0	0	0	0	0	0	0	0	0	0	0	0	0	0	0	0	0	0
Alistipes_sp._Marseille-P5997	0.2595	0	16.7965	0.0187	115.547	0	0	0	616.294	5.7265	42.6902	4.5168	0.3226	0	0	12.4317	0.3436	0	0.0417	0	0.056	0.7762	0	14.3702	0	3.3223	2.7056	0	1.3582	0	0	0	0	0.2004	0.0442	0	0	2.6384	0.094	3.2865	0	70.3762	30.8245	0.4038	0.0521	5.7871	0.0235	0.6296	1.8141
Pseudomonas_sp._FSL_R10-0056	0.0709	0	0	0	0	0	0	0	0	0	0	0	0	0	0	0	0	0	0	0	0	0	0	0	0	0	0	0	0	0	0	0	0	0	0	0	0	0	0	0	0	0	0.198	0	0	0	0	0	0.0508
Bacteroides_paurosaccharolyticus	31.6512	0	104.691	94.4538	102.067	219.187	48.8976	7.6631	33.9979	26.9713	2.0331	7.1449	8.4828	0	60.5339	29.5004	0.7979	0.2095	24.8431	122.028	1.1012	0.1193	0.8708	44.7034	0	15.8318	3.546	44.3134	0.3329	0	55.0062	2.7693	0	1.5504	9.6406	6.9176	0	23.3415	0.1456	4.7536	1.2323	75.7364	18.529	7.6187	6.2332	47.4356	0.4203	48.6659	19.7835
Streptococcus_vestibularis	44.9704	19.7407	10.6841	2.2686	1.4165	4.0762	8.3995	7.9637	18.0725	6.1329	153.799	370.652	0.7774	4.3	46.3274	6.9031	166.846	132.876	9.2977	337.776	10.7166	57.1807	251.564	832.646	89.6398	10.1359	112.932	8.3354	62.9573	0.2175	295.654	693.756	6.4528	2.2317	4.3414	230.567	12.7259	12.4513	90.9614	555.312	25.5814	2.1393	461.995	87.0903	70.2953	18.4106	2071.55	165.062	161.097
Subdoligranulum_sp._AM23-21AC	16.0629	0.7792	3.6877	3.4291	2.1319	9.2853	3.5909	3.2345	1.044	7.178	117.522	3.1973	4.9589	5.1657	49.9423	7.4537	47.5202	2.3214	12.6404	71.1457	1.7099	0.2987	10.1772	96.4585	1.9728	1.2899	2.4707	27.9136	8.4678	1.0157	19.3382	1.7382	3.3506	38.3646	71.6868	47.4909	3.571	49.7086	2.4732	2.092	7.2379	1.7765	141.384	76.6723	50.1895	10.1948	126.863	62.8523	5.6468
Leuconostocaceae_unclassified	0.1473	0.1144	0	0	0	0.3137	0.1067	0.5103	0	0	0.6433	8.1781	0.3854	0.1533	0.0726	9.1063	0.5074	1.5377	0.593	0	0.5722	3.1005	7.806	99.4164	1.7949	0	0.4352	0.0803	3.7821	0.2777	0.2203	6.3112	0.2425	0.0553	0.6971	2.3204	0	2.3485	0	0.35	1.7095	0	0	0	1.1241	0	0.8423	3.5902	0.1877
Streptococcus_sp._CCH8-H5	4.7883	1.9053	2.0308	0.1997	0	0.2005	0.6582	1.4965	0.9014	0.8133	19.0995	64.2725	0	0.3197	1.3576	0.9156	20.2398	15.1695	0.5516	63.9143	2.0195	5.0411	17.8263	64.3395	11.2679	1.274	10.113	1.1485	4.1354	0	71.8488	86.1535	0.827	0.1294	0.3981	20.4366	1.5372	0.7319	10.1993	38.7661	2.9591	0.3198	73.7055	6.3441	8.1275	0.8605	108.254	17.2825	13.5006
Anaerotruncus_massiliensis	1.023	0	2.6877	1.2315	0.6191	0	2.8726	1.5283	0.6463	0.1295	6.4771	2.4201	0.2102	0.4752	0.979	0.9227	0.266	0.7331	1.3732	1.9791	1.8172	0.6581	1.115	0.1275	0.1539	2.2206	0.4472	0.6402	2.4373	0.2399	0.3025	1.079	0	0.2628	1.661	0.8755	0.314	6.6218	0.5626	0.6426	0.3596	0.5943	1.1963	2.0944	3.2182	1.6639	2.8786	4.094	4.0577
Clostridium_sp._CT4	0.5503	0	0	0	0	0	0	0	0	0	0	0	0	0.0481	0	0	0	0	0	0	0	0	0	0	0	0	0	0	0	0	0	0	33.3285	0	0	0	0.2996	0	0	0	0	0	0	0	0	0	0	0	0
Abiotrophia_sp._HMSC24B09	0.7786	0	0	0	0	0.6132	0	0	0	0.1952	0	6.2388	0	0	0	0.1655	7.8011	0.1945	0	0	5.0085	0.8524	0	2.14	0.2858	1.8972	10.8772	0	0.2509	0	1.7025	3.538	0	0.2548	0	0	0	0	0	0	0.2757	0	1.9427	0.197	0	0	0	0.9034	0.9598
Bacteroides_sp._D1	382.323	0.3088	2382.1	861.739	899.781	292.734	244.065	50.6594	306.886	1309.49	67.0062	3.5992	162.209	1.6731	871.813	364.448	88.8298	7.0316	896.429	1073.23	11.7779	1.1715	2.6576	219.604	4.0543	104.775	7.2911	637.748	0.8823	4.1047	580.149	35.4127	0.5101	4.4133	233.239	37.6284	0	455.634	23.8161	13.0268	10.8652	802.241	93.447	231.56	25.495	1213.01	69.4265	305.383	106.822
Bacteroidaceae_unclassified	57.3785	0	153.689	140.107	79.2168	280.116	107.441	24.8462	130.565	192.163	12.2078	0	28.8974	0.3757	123.462	34.379	1.35	8.4025	152.318	347.509	0.768	1.1998	0.6929	82.9802	0.4114	24.9264	3.2551	130.809	0.7694	0.8274	186.049	4.1033	0.4683	3.5196	104.716	21.5752	0.2383	177.358	2.641	0.8144	11.5262	204.438	23.797	15.5132	5.2027	530.114	6.4674	147.333	57.0082
Prevotella_corporis	26.6758	0	71.4977	19.6965	37.0369	50.9818	13.9627	2.5483	6.8447	12.3963	2.0925	0.0824	5.0371	0	31.3985	11.2419	0.4504	3.5908	24.0087	18.1997	39.0367	0.548	1.2547	7.7613	0.1319	10.2866	4.1747	6.1088	0	0.4601	5.2058	3.6919	1.216	0.6798	46.4377	0.802	0.2499	28.9904	11.1987	4.2211	0	20.9447	3.037	7.9893	0.1069	22.2129	3.1996	22.1816	0.561
Actinomyces_succiniciruminis	0.0705	0.0419	0	0	0	0.1005	0	0	0	0	0	1.5423	0	0	0	0	0.278	0	0	0	0	0	0	0.3549	0	0	0	0	0	0	0	0	0	0	0	0	0	0	0.3803	0	0	0	0.4168	0	0	0	0	0	0.3741
Peptostreptococcaceae_unclassified	0.9624	0.2783	0	0	1.8509	0.7142	0	0	0	0.3556	1.4648	2.1544	0	0.8502	1.0708	1.2676	4.0272	0.8416	0.9883	0	1.7618	0.2272	7.4405	0.8157	0.6555	0	0.5721	0	0.6519	0.0412	1.9179	0.3703	1.5283	3.9869	3.133	0.4478	10.5494	0	0.8698	5.7698	0.4061	0.1301	7.672	0.6487	4.2269	0	3.3967	1.3194	2.6938
uncultured_bacterium_31i10a	0.2377	0	0.3158	1.7892	2.7546	10.3375	4.6136	5.7345	0	1.8262	50.0503	11.0885	0.3495	3.356	73.4181	43.635	2.8129	16.2458	3.4172	0.4441	19.8643	2.9129	10.8095	4.4886	3.3907	10.3084	1.2348	0.6943	19.365	3.2767	6.577	0.4755	2.7678	47.8823	1.6572	14.5753	3.874	36.5733	28.479	8.8877	0.2313	2.0992	23.8985	0.3306	1.5984	1.3035	4.1678	23.4952	0.9013
uncultured_bacterium_32o03	0.0798	63.1528	0	0	0	0	0	0.0988	0	0	5.8368	0	0.2739	0.0442	0.0703	0.0217	0	0.5374	0.8608	0	0	29.7781	0	43.8862	0.577	0	0	0.2332	0	0	0	0	0	0	0	6.6807	0	0	0	20.1121	0	10.0087	0	0	0.5567	4.0133	0	0	0.0404
Enterococcus_faecium	194.356	316.468	1336.93	97.4539	718.055	1196.83	1689.99	1911.83	674.275	1159.24	1144.39	809.619	148.573	216.071	773.642	413.663	685.107	434.087	342.047	424.708	785.112	296.639	345.556	515.056	1245.67	818.903	929.326	1632.69	315.578	1090.67	1388.88	778.188	141.478	234.239	1040.84	966.08	145.467	892.846	651.741	831.219	199.564	355.106	2230.21	847.835	642.523	1316.89	564.429	676.619	632.86
Ruminococcaceae_bacterium_AF10-16	48.7007	36.1869	627.16	16.1981	72.0306	72.5361	477.833	375.376	421.94	368.675	159.18	38.735	60.1977	30.9834	71.583	74.9733	76.8262	89.69	61.6678	274.627	45.7833	36.9343	158.194	46.4181	65.4222	61.7132	45.9004	47.8657	23.8722	51.5391	67.6308	65.7858	26.0599	29.8361	139.188	48.7142	20.4452	1065.36	37.7666	53.9264	45.5511	54.3967	402.411	62.7068	94.3302	160.904	25.2994	431.726	50.9701
Clostridium_sp._7_3_54FAA	19.7864	0.5384	0.388	2.537	3.8138	3.3016	13.5703	13.8035	1.5363	1.4487	39.3164	5.2643	0	0.7261	42.3806	11.3656	0.516	5.0436	2.27	8.9922	8.3535	6.609	13.1458	51.836	2.7642	3.6731	88.5244	413.858	10.4028	5.2123	57.0472	45.2437	1.6157	23.3533	210.386	64.3414	975.56	3.033	9.2752	4.9274	3.2768	1.9743	51.6191	69.7781	15.6181	3.6539	2.4498	11.599	11.6001
Enterobacter_sp._OLF	1.1074	0.9873	0	0	0	0	0.3582	1.3698	0	1.4177	0.5397	5.1011	11.9366	11.0342	0	0.4507	5.4592	3.153	2.2107	2.0684	0	3.6747	2.8335	0.9292	2.3164	4.9428	5.5387	4.8507	2.7333	5.744	0.276	1.7225	8.3144	13.7182	0.7017	1.0649	7.7335	0	0	0.8808	12.0889	0	0	1.0266	1.6544	0	0	0.7845	3.0785
Clostridiales_bacterium_VE202-01	1.2921	0.6008	0	0	0.6299	0.1058	0	0	0	0	0	0	0	0.7266	0.861	0.0921	0	0	0	1.9016	0	1.9923	0.1336	3.0993	0.1291	0	0.5223	0.4763	0	0.2012	0	0	0.7775	0.6414	0.6015	0	4.4258	0	0.0801	0	0.3403	0.3525	0	0	0.338	0	1.3313	0	0.8885
Streptococcus_sp._CECT_9732	0.1877	0.0376	0	0	0	0	0	0.2345	0	0	0.5373	1.2741	0.0929	0	0	0	0.2416	0.1903	0.1514	0.236	0	0.1452	2.9072	0.6314	0.1442	0	1.2286	0.0894	2.3107	0	0.0916	0.5897	0	0.0367	0	0.5441	0.2852	0	0.4049	0.1979	0.0794	0	0.1811	0	0.9267	0	0	0.94	1.6229
Sphingobacterium_sp._JUb78	6.7863	0	8.2018	15.617	8.1523	3.6241	2.3785	1.0949	1.7401	6.1022	0.6636	0	1.8683	0	4.0737	3.9903	0.2685	0	5.0567	10.9376	0.0973	0	0	3.5424	0	0.4631	0.262	4.5733	0	0.0404	2.7152	0	0	0	1.6684	0.3929	0	7.7261	0.147	0	0.0883	2.7821	4.0263	2.6512	0.5426	7.9647	0.1836	1.9295	0.4818
Ruminococcus_sp._AF17-22AC	40.1507	46.1494	8.5408	7.1656	23.4444	78.834	51.8644	54.1227	9.4245	67.9696	75.9639	48.1783	9.1556	26.036	214.573	120.629	21.5146	138.446	60.2881	26.6934	77.1541	26.3716	137.323	81.7727	62.804	127.1	273.674	33.4429	265.825	79.2194	61.1637	217.8	27.3929	73.5969	59.842	274.715	165.874	125.338	122.541	110.632	55.2887	27.0507	82.7563	46.5767	50.795	68.9243	275.653	224.368	38.3258
Ruminococcus_sp._TF06-23	5.5613	13.982	16.7462	14.6817	22.4452	10.5471	62.6003	69.3275	8.901	61.8653	17.4681	16.4566	2.6619	2.6472	156.002	4.9194	60.409	30.5506	10.7406	36.4056	27.9981	16.931	64.2311	129.282	18.5069	75.3748	11.5518	23.1806	27.6513	27.5689	37.9882	23.4829	30.1795	6.0199	47.8444	27.2791	0.4947	117.038	107.077	48.1422	16.8992	6.4543	103.647	8.8672	18.1798	12.8665	145.358	38.4758	30.4934
Ruminococcus_sp._AM28-41	4.0993	22.52	5.1131	8.2787	10.4505	7.659	9.9372	10.7532	4.7849	6.7079	34.5406	4.84	5.1245	1.5096	26.363	7.396	15.7219	22.8448	2.1608	6.6168	20.1512	11.5201	29.4964	189.022	29.9299	15.1053	2.9508	14.3116	20.2609	25.9971	48.7776	38.0556	3.8973	11.9186	7.8702	11.1835	6.268	58.2794	30.7016	12.3018	10.7707	3.7902	48.6689	6.0392	20.5514	5.7049	34.9561	11.2587	13.9542
Anaerofustis_stercorihominis	19.2919	82.4085	24.6926	8.545	11.8825	4.8023	49.1766	70.1582	7.359	79.0631	13.9041	9.7059	2.1679	1.4554	26.0612	15.7729	8.7543	33.9475	22.4405	17.5641	14.9906	11.6435	17.0779	14.1212	21.737	10.9064	8.4109	7.1539	8.8661	31.5475	24.5995	13.9116	1.5231	9.1808	26.4409	6.8686	0.3765	30.5895	4.6459	20.5317	9.7757	1.4685	24.5539	13.6891	15.2329	11.4593	8.2046	23.3708	6.6257
Ruminococcus_sp._AF13-28	7.6538	10.9239	1.7372	5.0533	4.5036	4.4684	8.3019	7.2198	5.9996	11.7059	8.5474	1.1545	0.7787	0.1501	13.9167	5.1434	8.2767	4.3163	1.9962	4.093	2.5093	5.0057	5.8086	25.8579	6.9929	2.9177	1.961	19.1492	2.3014	22.1694	9.8074	4.6324	3.3101	0.8512	4.2029	17.6292	13.7609	15.4353	45.8936	63.1261	11.4207	6.0285	17.3351	4.8415	11.0332	10.9383	11.6858	2.5413	21.3151
Bacteroides_coprophilus_CAG:333	30.3021	1.1579	30.3112	51.9755	31.5203	37.678	13.9826	9.8449	25.8071	9.8217	3.8992	1.7948	2.1599	0.2452	22.8525	9.2898	0	1.0664	13.481	12.4571	1.3111	0.9804	16.0593	10.1102	2.5864	4.4336	1.4046	18.128	3.8469	0.5273	5.5126	0.1281	0	5.4051	7.788	1.6927	2.721	2.9309	0.3187	0.4564	0.7599	24.1449	4.1048	13.3936	6.3027	43.7101	3.6946	13.7356	15.5013
Desulfovibrionaceae_bacterium	2.0441	0	1.1803	0	0.7367	0	5.8821	1.2432	0	2.9761	0	0.9205	0	0.0918	0	0.0636	0.6612	0	0.4577	0	0	0	0	0	0	0	0.0947	0.1141	0	0	0.5848	0	0	0	0	0	0	4.3699	2.1921	0	0.1389	0	10.7571	0	0	0	0	0	0
Lachnospiraceae_bacterium_NE2001	1.4074	0.0463	0	0.1839	0	0	1.6598	0	0	0	0	0.1795	0	0	0	0	0.1537	0	0.2049	0	0	0.1193	0	0	0	0	1.2592	0	0	0	0	0	0	0	0	0.4935	0	0	0	0	0	0	1.7476	0	0	0	0	0	0.0591
Olsenella_sp._Marseille-P4518	0.0337	0	0	0	0	0	0	0	0	0	0	0.1553	0	0	0	0	0	0	0	0	0.0722	0	0	0	0	0	0.1557	0	0	0	0	0	0	0	0	0	0	0.4415	0.0728	0	0	0	5.5826	0	0	0	0	0.1433	0
Candidatus_Gastranaerophilales_bacterium	3.1642	21.6376	0	2.4454	0	2.7023	0	0.3517	0	5.8242	0	0	0.1393	0	3.5022	1.3885	0.1287	0	1.1352	20.0966	0	0	0	0	0	0	0	1.3838	0	0	2.8345	1.0979	0	0	82.3472	0	0	4.1361	0	0	0	0	6.6546	0	0.8496	12.9914	0	9.0801	0.1437
Atopobium_unclassified	7.9684	0.1208	0.4287	0	0	1.1388	1.056	0.1886	0	0.2615	2.4188	17.0097	0	0.1563	1.107	1.3762	4.0973	0.2212	0.1608	1.1418	23.7722	16.2811	10.1639	1.9971	3.8773	4.908	40.7379	2.7556	4.257	0.7534	1.838	0.8093	1.7595	0.1903	3.4078	1.6105	24.7302	0.1811	8.4608	17.0341	0	0.1956	2.4789	1.2843	2.4368	1.0608	1.72	0	3.2292
Coprobacillus_sp._AF15-30	0.5478	0.4346	1.4131	0	0.2567	2.597	0.3535	0	0	0	1.1663	0	0	0.1513	2.1637	0.2024	0	0	0.6753	3.6009	1.242	0.558	1.1542	0.1673	3.1265	0.1696	0	0.0971	0.4496	0.324	0.3718	0	0	0.3276	3.463	1.2678	0.6361	1.8481	0.4304	0.2898	0.8717	0.6547	9.0411	0.3081	0.5443	0	1.4739	0.4239	0.5525
Streptococcus_phage_CHPC1247	0.0471	0	0	0	0	0	0	0	0	0	0	0.1084	0	0	0	0	0	0	0	0	0	0	0	0	0	0	0.2173	0	0	0	0	0	0	0	0	0	0	0	0	0	0	0	0	0	0	0	0	0	0
Anaerobium_acetethylicum	10.7582	0.0323	15.4114	0.501	3.3321	0	1.8883	0.7775	0.3017	0.8808	3.1214	0.0762	0.1644	0.7347	0.3575	1.9387	0	10.2686	45.3888	0.0788	0.0709	1.6493	0	0.9511	0.031	3.4217	0.2801	0.1379	0	3.2336	0	0	0.0138	1.0748	1.519	2.4391	8.6377	2.2672	0.051	1.3956	0.1144	0.6248	3.6185	5.1374	3.3416	0.7395	1.7293	2.6704	2.5252
Lachnospiraceae_bacterium_3_1_57FAA_CT1	169.453	137.792	435.787	67.135	279.299	212.666	491.595	495.892	133.359	499.132	394.817	271.041	27.4784	81.252	266.067	217.509	86.5757	318.083	226.284	254.426	383.738	268.358	339.483	205.784	261.625	293.432	384.83	229.783	284.859	420.831	362.705	490.386	77.52	207.451	218.502	280.469	94.0202	409.571	131.457	715.532	156.569	69.0147	455.795	332.18	657.636	181.798	155.695	403.972	128.716
Ruminococcus_sp._AF33-11BH	13.5947	39.9759	15.8334	4.7259	15.7968	20.1261	33.5193	40.1868	2.2265	62.863	17.8352	8.0793	3.8916	1.2046	140.888	7.7116	68.1021	19.2006	8.8124	25.1864	31.9886	58.5763	34.4906	126.993	35.268	19.6228	7.4732	18.1916	27.619	46.5799	33.0715	21.5995	28.6526	6.2726	32.8668	48.5345	0.797	103.109	106.205	60.4894	24.6274	11.4821	98.6525	8.4992	19.2138	4.0242	153.23	10.0161	50.0922
Clostridiaceae_bacterium_OF09-1	14.2015	28.2383	3.0676	3.4089	57.7865	0.6116	1.6943	0.8626	16.2737	29.1019	53.0849	3.9313	0.0841	0.1592	70.4764	82.1588	1.555	36.0009	24.2542	5.4832	53.4744	89.1224	4.888	106.809	10.8346	67.2794	10.8527	4.1476	18.789	4.8087	32.3525	25.0184	10.9965	0.1972	3.8085	46.8675	1.4842	42.4026	15.7558	26.8413	0.0973	17.4326	26.0667	1.8625	85.4889	24.5246	21.3258	16.3497	2.424
Variovorax_sp.	0.182	0	0	0	0	0	0	0	0	0	0	0	0	0	0	0	0	0	0	0	0	0	0	0	0	0	0	0	0	0	0	0	0	0	0	0	0	0	0	0	0	0	0	0	0	0	0	0	0
Alistipes_putredinis	289.437	2.4417	3127.48	965.212	338.16	658.682	2379.29	818.851	366.845	2969.36	78.9514	12.124	1255.17	23.6689	6363.54	1117.82	158.329	118.974	1452.5	4412.79	12.4541	25.0301	23.312	130.125	13.5244	79.2554	206.189	1195.87	16.5528	31.5533	3929.97	34.7432	16.2099	23.5926	1281.51	370.923	10.5984	3740.4	8.5464	32.6643	31.579	396.06	160.967	148.889	239.253	10770.3	140.835	276.13	107.772
Enterobacterales_unclassified	278.925	106.019	5.0038	5.5599	38.3497	4.8323	186.094	152.408	18.5431	704.812	49.8671	625.306	1150.71	1865.84	1.7115	219.818	1824.52	515.993	390.789	212.331	73.3066	289.094	532.209	200.789	257.866	250.262	585.644	689.054	4890.43	535.934	95.1143	9307.63	686.247	1401.17	84.4686	692.701	9229.47	19.5083	14.5983	1133.27	1417.13	4.6958	11.1787	381.216	271.52	20.7873	92.1086	57.6269	266.47
Odoribacter_splanchnicus	164.071	135.793	553.328	260.378	422.585	661.239	177.743	44.0048	133.718	393.386	65.1461	53.8461	106.882	31.9219	376.399	166.657	202.225	41.068	209.564	794.323	26.2446	26.5398	28.6097	122.306	38.2069	96.6181	102.55	570.896	94.4793	38.1222	515.497	25.7186	7.5665	70.0363	105.117	34.8788	3.8679	687.983	19.0107	31.6842	57.8273	178.618	302.394	74.41	93.7964	908.995	35.9981	309.869	67.6323
Blautia_sp._AM29-29	31.5848	77.1435	26.0953	57.4792	87.217	22.7266	65.9375	63.9028	57.7194	102.642	30.2949	35.0361	116.317	106.302	14.8569	47.4729	70.9674	114.234	43.6304	52.8383	173.798	111.896	198.665	37.7742	227.584	54.0405	78.8636	123.486	605.847	75.5544	82.9327	474.684	119.665	122.088	26.3603	209.315	378.24	33.5168	48.7755	78.2685	139.85	22.5204	57.6084	38.451	122.531	18.4467	86.8949	26.8394	56.5855
Firmicutes_bacterium_CAG:110	20.8046	1.5278	152.845	7.1289	8.7726	6.3822	42.5282	26.2177	16.1995	21.6201	22.003	2.2516	1.827	0.6543	4.8162	9.8423	5.5798	104.834	30.2314	4.0222	10.597	5.7299	22.2914	11.575	11.0819	10.4599	9.4944	11.2848	3.5014	7.7923	49.734	19.9353	0.8065	2.8441	28.3058	10.8057	0.7945	1760.54	19.8278	13.5127	6.6105	4.8003	522.05	8.6651	15.5585	43.9594	1.2908	23.3215	20.0681
Selenomonas_sp._oral_taxon_138	35.2511	4.6434	43.4031	6.0042	45.9445	41.26	96.8213	68.8528	22.12	44.3265	79.431	17.585	4.0453	9.2883	8.6699	19.654	12.6046	8.824	58.2734	67.9855	11.4118	17.2677	10.694	16.0906	45.7835	26.719	16.6001	42.5168	17.092	37.26	155.854	9.9427	0.1797	6.705	5.6256	13.8308	5.5799	111.582	42.3466	44.3452	8.636	11.0663	299.221	33.8176	98.9458	36.0208	6.0286	94.3389	3.7693
Roseomonas_sp._AR75	0.4031	0.6708	0	0	0	0	0	1.7949	2.0601	3.0962	0	0	0	0	0	0	0	0	0	0	0	0	0	0	0	0	0	0	0	0	0.9644	0.4299	0	0.3866	0	0.2326	0	1.759	0	0.7694	0	0	0.9534	0	0.2409	1.768	0.4348	0	0.1222
Siphoviridae_sp.	0.3157	0	0	0	0	0	0	0	0	0	0	0	0	0	0	0	0	0	0	0	0	0	0	0	0	0	0	0	0	0	0	0	0	0	0	0	0	0	0	0	0.1159	0.1138	0	0	0	0	0	0	0
Streptococcus_sp._oral_taxon_064	0.0277	0	0	0	0.8565	0	0	0	0	0	0	0.7023	0	0	0	0.0903	0.1093	0	0	0	0.1782	0.1698	2.1607	0.1396	0	0	0	0	0.4105	0	0	0	0.0842	0.0332	0	0.16	0.1291	0.121	0.0598	1.0584	0	0	0.6557	0.0514	0.0828	0	0.2991	0	0.1681
Escherichia_sp._TW10509	3.1516	3.7877	0	1.4894	0	0	0.6721	1.6065	0	9.9766	4.0507	9.9156	50.5465	52.795	0	6.5061	19.5464	29.4221	6.5132	16.2112	0.742	22.3207	12.2296	2.6156	13.2141	13.1357	33.3958	16.1823	20.6708	19.6051	1.5537	13.0866	171.735	37.1401	6.6016	1.249	64.8858	0.3779	0.3738	8.2975	55.4734	0.1799	0	2.7291	5.2365	0.5127	1.2236	0.368	17.1838
Hydrogenispora_ethanolica	15.7112	0	0.3012	0.0609	2.6377	0	6.5438	11.5425	2.2208	0.2177	2.0714	10.9649	0.0417	0	0	0	0.1118	6.6453	0.3394	0.2117	33.9062	0.9331	13.7876	0	2.0045	1.048	14.8819	3.0618	0.4896	1.2095	0.1808	1.1334	0	3.3462	0.3065	3.0657	0	0.6802	0	1.2171	0	1.1186	3.4797	27.0609	5.5884	0.4661	0.0764	1.5658	0
[Ruminococcus]_gnavus	21245.8	29921.6	2069.07	3946.51	47405.3	10524.4	2741.63	3055.58	1203.28	2414.27	6476.8	5383.35	241.538	7265.44	9850.56	18908.9	1596.22	4346.12	2002.96	33961.9	9827.64	24753.3	35488.6	14939.1	7294.53	2176.42	4878.98	1658.74	30413.3	2591.15	4175.13	2910.7	128896	101933	107895	4656.55	122771	3613.3	2842.18	29626.3	59818.6	6583.5	7260.65	6191.33	30419.4	1649.77	41425.3	6611.07	102665
Lawsonibacter_asaccharolyticus	63.2415	23.6941	934.75	217.761	571.236	971.208	1433.02	2269.42	560.319	1211.71	504.834	100.96	118.193	11.4029	300.418	459.421	853.944	1147.21	213.464	660.206	428.303	12.0055	328.916	214.525	863.501	775.81	23.603	175.576	25.8067	179.032	505.553	1124.39	26.2005	8.3101	1150.77	185.121	2.048	890.28	526.22	562.058	75.1919	268.574	1504.14	231.34	518.047	444.362	93.6983	742.627	398.326
Bacteroides_sp._CF01-10NS	38.1797	0.1138	72.3928	1802.68	477.044	298.865	388.633	73.0784	319.379	357.006	9.4557	17.4688	274.312	2.5851	753.46	325.069	8.297	5.1059	171.044	3048.99	2.8733	0.4724	17.3203	287.052	4.363	186.805	1.3937	410.432	1.1568	1.6157	324.184	163.405	0.0449	4.5127	837.325	106.665	0.3274	172.789	6.4849	4.1768	3.6407	176.601	74.45	2554.93	11.3175	2364.3	34.6323	361.424	40.4532
Bacteroides_sp._AF39-16AC	16.2701	0	53.782	49.8933	90.5226	64.5917	57.2001	13.8348	1.7648	149.869	2.7707	0.0751	11.2645	0.2171	55.61	4.0713	1.1565	6.6302	81.5604	264.645	1.6853	0.0567	0.4864	35.5276	0.3011	41.653	0.6735	84.9165	0.073	1.2039	40.6369	0.7937	0	0	22.6669	15.1696	0	43.6258	2.1404	11.4483	0.5918	57.6577	4.0564	23.337	8.4148	306.581	23.9615	67.2831	7.6358
uncultured_bacterium_EB1	9.7894	0.1737	58.2345	3.4559	32.1654	133.731	80.5265	90.5477	36.4058	74.6375	67.5012	61.9223	7.0873	1.2133	51.292	25.6875	8.0675	8.6229	25.5522	24.5618	3.4434	18.3497	1.7255	34.5744	13.0032	70.4346	9.107	100.697	2.1639	81.5917	53.312	28.832	0.5917	11.0354	23.3322	12.6462	0	36.3463	6.6226	43.698	0.5685	15.4814	82.0779	41.99	20.9564	84.9207	5.1229	26.0847	34.7848
Bacteroidetes_bacterium_oral_taxon_272	41.7047	0	216.645	44.1114	129.494	74.2141	57.6428	12.6649	14.8559	87.1486	5.4831	1.3821	18.3024	0.1869	65.5323	27.3512	0.4437	1.7474	25.6065	174.989	0.5625	0.6893	0.2658	25.8688	0.1712	13.7748	3.6363	23.1092	0	0.3335	23.6672	0.7001	0.038	0.1349	11.883	1.623	0.0873	105.735	2.3475	14.4384	0.2432	58.5944	14.6368	2.4338	3.6982	45.2408	2.5288	78.9117	1.4786
bacterium_1XD21-70	74.0018	7.8294	3.4024	3.0767	4.7014	1.8787	14.4352	16.7588	1.1714	3.4366	24.4934	11.146	0.0248	3.194	11.6584	0.2591	1.2611	6.712	0.5853	2.0001	3.4363	1.8884	7.314	0.6176	2.2537	4.5555	0.4063	2.3643	3.1268	91.0848	2.7674	7.6306	0.3237	6.3534	5.0669	4.6644	0.4947	13.6504	3.8144	17.823	3.6018	0.421	6.7189	7.0445	590.546	0.5082	2.341	1.1617	2.8394
Enterobacter_sp._B509	0.1182	0.3044	0	0	0	0	1.0705	0.658	0	1.9673	0.1152	0.4538	0.4344	0.9488	0	0.481	5.0503	0.7343	0.4248	0	0.0422	0.2414	0.8376	0	0.3596	0.3015	2.5468	7.3638	46.9736	1.7518	0.5892	26.7394	0.7379	4.4874	0.4494	8.2982	25.7735	0	0.0425	4.7636	1.2521	0	0	0.6575	0.6475	0	0.4782	0	0.4481
Pseudomonas_saponiphila	0.1677	0	0	0	0	0	0	0	0	0	0	0	0	0	0	0	0	0	0	0	0	0	0	0	0	0	0	0	0	0	0	0	0	0	0	0	0	0	0	0	0	0	0	0	0	0	0	0	0
Prevotella_sp._CAG:5226	5.9955	0	2.5513	16.3637	6.5781	7.1656	4.7959	0.3098	3.7339	2.509	0.4883	15.6709	1.7426	0	9.432	2.6367	0	0	1.4101	3.0098	0	0.179	0.1972	2.417	0	1.0116	0	3.8767	0	0	3.4269	0.2226	0	0.3704	1.4708	0.6504	0	3.4411	0.1802	0	0.1083	10.7805	14.0712	2.6084	0.8357	9.3124	0.3828	2.9272	3.8328
Citrobacter_sp._BIDMC108	1.871	1.5869	0	0	0	0.1025	0.6298	0.4004	0	6.5708	0.2103	4.9299	20.3005	16.0547	0	2.8513	26.3712	7.3005	3.0156	4.4337	0.6164	8.0973	7.0947	1.4486	6.5467	4.5867	9.7141	4.0474	7.5445	10.1317	0.4303	3.2608	16.8867	17.3763	1.374	13.1645	8.7911	0.3139	0.1553	2.2061	17.1224	0	0.2127	3.3513	2.5293	0.3944	0.3406	1.223	6.0537
Roseburia_unclassified	17181	19121.1	903.717	1014.12	1520.23	327.351	3327.26	2973.16	2014.38	15846.1	39723	460.556	622.254	1293.82	1624.29	15515.5	759.347	3330.74	14201.3	853.108	20148.7	30134.8	2034.68	19596.7	8302.47	2646.88	1195.91	1116.3	5154.29	5604.81	12756.2	3395.29	729.548	247.492	234.371	16650.8	210.827	3618.72	2998.38	13118.4	589.286	8395.11	4209.86	22949.6	5324.62	7213.49	1535.22	5427	447.207
Holdemania_filiformis	445.7	156.762	414.082	146.475	520.257	408.217	959.664	1352.03	603.068	1103.51	769.176	506.047	74.5166	142.608	551.051	469.594	101.74	1275.14	420.717	382.509	618.946	239.598	617.619	392.148	1104.14	674.147	459.266	554.252	370.08	351.517	603.523	498.509	56.6145	274.586	697.478	1131.66	126.959	972.378	282.894	752.387	164.592	123.071	1383.66	596.182	634.696	516.424	187.077	886.891	563.295
Bacteroides_massiliensis	272.33	0.1723	836.418	439.942	373.473	383.595	213.553	35.6886	519.863	169.765	10.4446	0.7076	44.3174	1.0621	337.502	83.3801	3.9361	10.3125	303.991	312.25	1.8037	7.2749	2.1706	82.3718	1.4489	68.3453	15.4775	147.466	1.0109	1.0173	283.525	4.1519	0.0934	8.4265	110.33	20.0241	0.2481	119.891	17.6318	9.3757	2.8089	272.716	10.8999	92.1725	19.8152	320.704	18.2709	172.531	105.817
Streptococcus_sp._HMSC078H12	7.0585	4.8161	2.4217	0.28	0.7371	0.3489	1.5007	1.0988	3.8142	0.7812	25.6317	62.5599	0.1721	0.6244	2.3313	0.6168	15.4822	28.1464	1.1598	51.0518	2.0763	10.2378	35.754	67.6366	20.5378	1.5655	12.7703	2.0919	4.3967	0.0972	49.3024	126.761	0.7849	0.2314	0.2683	36.6518	2.2916	0.7189	14.1005	57.2816	3.6017	0.229	81.5579	6.5525	6.2299	6.1959	80.3475	41.6887	31.7103
Viruses_noname_unclassified	0.1637	0	0	0	5.0787	0	0	0	0	12.4815	0	0	2.4174	0	0.3857	0	9.7963	0	0	0	0	0.2238	0	0	0	1.4907	0	0	0.087	0	0	0	0	0	1.4814	0	0	0	0	0	0	0	0	0	0	0	0	31.6743	0.4431
Streptococcus_sp._AS20	0.1969	0.0878	0	0	0	0	0	0	0.4717	0	1.1513	2.7206	0	0	0.4547	0.0801	0.9705	3.516	0.1769	1.6547	0.1582	0.0754	0.1744	5.3275	0.4492	0.3138	2.7836	0	0.1215	0	4.2686	1.378	0.0747	0.059	0.1871	1.7039	0.0573	0.3222	0.6905	2.5837	0.7341	0	1.0186	0.1825	0.3677	0	4.2477	0.9414	0.7463
Alistipes_timonensis	0.0238	0	7.5932	4.7109	0.092	1.2901	9.2891	2.3861	5.4012	8.4149	1.8104	0	1.5052	0	12.1943	0.2714	0	0	2.0253	37.3196	0	0	0	0.0599	0	0.7593	0	6.0503	0	0	11.645	0	0	0	0	0.0344	0	14.3424	0.1799	0	0	0.099	0.4929	0	0.5693	17.4972	0	15.7407	0
Bacteroides_sp._AM22-3LB	47.5946	0.1413	226.63	91.2712	59.0079	36.8447	51.6126	9.1464	114.987	30.9086	2.0189	3.999	3.8609	0	38.3655	19.0184	2.8484	3.233	59.3589	46.1022	0.4967	1.467	0	10.5206	0.9152	16.518	2.0934	47.5533	0	0.1031	35.896	1.9219	0	1.1012	10.6809	2.4688	0	49.3395	5.1889	0.3342	0.4575	90.6393	8.0397	7.4106	2.2467	35.5805	2.4315	31.8735	26.6456
Bacillus_megaterium	0.144	0	0	0.0571	0	0	0.3093	0.2957	0	0	0.1554	0	0	0.0441	0	0.7784	0	0	0	0	0.0569	0	0	0	0	0.8131	0	0	0	0	0	0	0	0.0318	0.6343	0	0	0	0.1628	0	0.0345	0.1656	0	0.197	2.325	0	0.4299	0.2258	0.6848
Absiella_sp._AM29-15	57.4936	13.0753	243.951	23.8235	160.921	434.456	494.253	497.453	137.226	260.582	229.451	99.961	26.4365	14.6385	142.896	118.187	32.2084	45.1921	65.4639	66.1864	33.2776	60.1722	58.4675	115.624	200.96	185.987	394.413	268.377	34.7724	250.539	181.702	100.726	9.6799	98.783	321.356	69.4386	60.5307	125.532	39.3914	167.632	36.7304	107.013	312.773	142.61	131.492	251.2	30.8474	134.927	124.226
Akkermansia_sp._BIOML-A61	57.1704	0.1635	135.357	181.334	86.7307	102.766	32.4953	5.627	47.651	105.494	12.7786	0.637	19.2093	0.0863	61.6957	35.9268	1.6644	3.1518	28.6461	98.6357	0.0423	1.1112	0	38.7788	0.4111	15.4192	1.1783	49.4193	0	0.5004	58.7344	1.0751	0	0.145	31.1249	6.1287	0	102.043	0.4853	1.6971	0.7695	37.8446	41.0829	22.64	0.8808	115.829	1.9779	34.6571	11.0659
Ruminococcus_sp._OM05-10BH	4.6322	0	4.7035	0.4978	3.1934	0	2.498	4.1185	1.62	2.4104	4.5871	0.0724	0.4464	0.067	1.3856	1.5549	0.7082	0.4765	2.3288	1.0476	0.2695	1.6498	2.0614	3.7276	5.3199	2.5261	7.571	0.0678	0	0.6954	2.149	0.3048	3.7031	3.5349	0.8533	5.6326	0	0.6916	2.2489	0.2906	1.3664	0.335	6.0484	1.0463	4.2809	21.6776	3.0308	4.3256	3.5597
Obesumbacterium_proteus	0.2147	0.0851	0	0	0.5528	0.4081	0	0.7967	0	0.2749	0	1.3187	0	0.3565	0	0	0.5645	0.2223	0	0	0	0	0	0.3603	0	0.7301	0.1652	0	0.3533	0	0.214	0	0.1449	0	0.3628	0	0.3332	0.6246	0.4634	0.6831	0.3713	0	0	0	0.4277	0.7848	0	2.4336	0.9767
Xenorhabdus_innexi	4.8843	5.3595	0.6655	0.5386	0	0	12.638	9.7596	0	21.6457	2.1971	22.7882	72.162	102.537	0	12.0283	77.5468	30.3423	21.9019	14.5032	2.6831	37.4028	32.5388	8.8275	25.1491	34.818	65.6281	77.5338	264.614	53.6768	7.4912	230.099	51.7284	88.7334	13.6502	74.0707	256.556	0.5466	0	55.3862	81.5443	0	9.6272	13.4678	12.7235	0.6867	4.0533	1.597	27.3467
Candidatus_Melainabacteria_bacterium_LEY3_CP_29_8	12.6011	0	0	0	0	0	0	0	0	0	0	0	0	0	0	0	0	0	0	0	0	0	0	0	0	0	0	0	0	0	0	0	0	0	0	0	0	0	0	0	0	0	0	0	0	0	0	0	0
[Clostridium]_cellulosi	98.6077	196.634	574.669	163.856	348.627	282.991	553.884	514.952	223.053	411.325	364.57	216.981	26.1353	39.1568	178.277	152.603	272.019	344.743	323.416	200.189	315.639	270.064	442.801	272.611	276.236	203.822	238.013	278.876	394.87	278.488	593.508	160.317	198.644	147.982	172.38	812.408	908.917	596.218	119.859	763.707	220.318	299.533	943.374	233.2	765.563	197.512	333.426	569.953	225.957
[Clostridium]_amygdalinum	1120.58	29.1042	181.214	74.0272	299.288	277.238	766.828	838.288	442.967	135.64	829.301	161.462	10.9232	37.8433	263.901	457.851	28.5696	556.614	223.472	134.882	174.868	204.383	1210.09	140.989	480.036	84.5146	112.08	480.2	115.553	354.274	181.8	204.21	33.8929	294.954	65.8226	218.649	4.7893	264.297	69.8059	233.619	235.004	119.829	342.797	1220.07	462.51	45.5045	51.168	360.06	661.284
Bacteroides_sp._1_1_14	141.258	0.7411	253.458	348.603	123.61	366.809	240.558	52.277	122.816	208.622	43.4414	82.8362	95.9108	12.3633	556.883	72.0046	3.7768	23.8797	147.317	771.155	22.557	9.9804	12.0712	130.554	13.2093	55.8376	126.068	139.287	35.3858	76.4922	79.7354	20.776	7.5286	77.9062	133.596	29.1608	1.9427	186.903	4.7639	15.0246	14.5858	136.193	81.313	70.4218	42.329	443.654	9.6359	162.463	47.2412
Porphyromonas_sp._HMSC077F02	21.0399	0.1069	190.173	87.1941	51.7425	73.323	28.9651	5.3386	47.6794	47.6575	11.5679	40.7983	32.3804	1.1946	74.7576	19.3205	2.8369	2.2343	31.018	163.914	2.5043	1.1017	0.6371	37.5735	1.8466	34.6296	4.9816	103.716	0	0.7995	100.843	1.9181	0	0.1078	55.1541	15.3052	0	97.3159	2.9111	4.8633	1.866	84.622	34.5591	20.3386	10.2095	343.627	3.1526	34.0152	21.1333
uncultured_Coprococcus_sp.	3.1823	67.4798	17.3246	10.642	32.5663	7.0676	28.7612	35.1144	5.4748	21.4855	67.8221	3.2437	0.8389	9.4499	12.9486	59.0463	7.5926	20.265	20.0801	4.4453	52.0638	47.9219	56.3989	99.2316	14.8751	11.9396	11.0545	4.451	10.0424	54.7324	53.3989	7.081	4.262	1.709	18.888	8.5691	26.211	12.4315	8.95	12.5813	4.6353	28.3448	26.1704	77.8429	56.6921	3.7306	30.5746	4.2456	22.8621
Anaeroglobus_geminatus	2.4273	0.0748	0	0.0798	0	0	0	0	0	0.1425	0	1.3354	0	0	0.0998	0.047	0.1138	0.1793	0.1689	0.6848	54.4625	3.2001	0	1.2013	1.0588	0.4495	0.1492	0.3088	0	0	0.2331	1.854	0	16.1026	0	0.4067	4.1771	0	0.1274	12.0264	0.0749	0.473	0	1.0532	0.2309	0.1317	0	0	0.3852
Negativicutes_unclassified	19.2572	1015.38	535.139	0	0	0	212.124	317.283	0	0.0515	0	11.5135	0	0.3568	0	0	0	0	0	40.897	0	0	0	0	0.079	0	0	91.8728	13.2998	0.2681	120.604	0.6137	0.4078	0.0965	0.4633	860.72	0.177	0	0.0748	8.2758	0	0.2208	20.7787	9.6983	0.2526	0.4096	3.0198	3.1158	0.0981
Azospirillum_sp.	32.1523	0.1761	0	0	0	6.0474	0	0.0594	0.6055	0.0615	0	0	0	0	8.8032	0	0	0.0497	0	0	0.0686	0	0	8.0357	0	0	0	0	0.6821	0	0	0	5.2386	0	0	0	0.8965	0.4193	0	2.6922	0	1.1482	0	0	1.4385	0	1.5175	1.6114	0
Adlercreutzia_equolifaciens	0.1459	0	1.7509	0	0	0	0	0	0	0	0	0	0	0	0	0	1.021	1.2427	0	0.4396	0	0	0	0	0	0.3602	0.0543	0	0.2324	0.1674	0	0	0	0	0	0	0.0548	0	2.2859	0	0.0305	0	6.2173	0	0.7736	0.2581	0	0	0
Clostridium_sp._CAG:798	1.3124	0.824	0.3404	0.1377	0.0331	0.1709	0.9221	0.4208	0	1.686	0	6.3366	9.6777	6.0945	0.2536	0.695	6.8823	1.8182	1.6391	3.6557	0.3307	4.2946	3.9623	1.2317	3.6288	4.2857	5.0281	2.6882	2.0129	5.7287	0.2751	2.5862	7.7192	5.199	0.9302	0.2347	3.4787	0	0	0.2595	7.9104	0.0354	0.9044	2.0357	1.2184	0.4471	0	0.1361	2.535
Treponema_maltophilum	0.4893	0	0	0	0	0	0.9495	0.6052	0	0	0	0	0	0	0	0.2655	0	0	0	0	0	0	0	0	0	1.664	0	0	0	0	0	0	0	0	1.2403	0	0	0	0	0	0	0	0	0	0.9747	0	0.6598	3.813	1.2366
Rothia_sp._HMSC073B08	0.6019	0	0	0	0	0.3107	0	0.1928	0	0	1.6672	2.0429	0	0	0	0.3713	1.3493	0.4841	0	0	5.2013	0.5162	0.2574	4.2551	0.1301	0	2.8139	0	0.8195	0	0.6821	1.4258	0.4888	0	0.8415	0	1.2919	0.2267	3.1014	1.9996	0	0	0.9815	0.9045	1.1472	0.6253	0.4614	0	2.054
Oscillibacter_sp._PC13	15.897	0.0615	18.3615	2.6451	5.065	0.2577	5.2199	4.0756	7.3042	8.8288	0.8399	3.8769	0.0723	0.1201	0.3817	0.9376	2.7241	0.0555	1.0408	0.2701	3.3217	0.3418	0.5122	0.0872	0.6758	1.2892	0.5571	0	1.3849	0.16	5.336	0.0462	0	0	4.2501	0.7455	0	23.9064	0.2816	0	0	0.8522	40.6589	2.1247	4.0458	4.1715	3.4116	3.0692	0.7976
Klebsiella_quasipneumoniae	28.9174	53.9903	1.065	3.0421	1.2117	0.3883	54.6875	37.6	0	78.2672	11.5033	97.7453	360.444	349.894	4.7085	46.0624	215.582	136.029	89.8891	50.8691	19.8535	143.125	194.876	23.99	104.635	121.55	294.777	403.236	2771.9	233.602	60.6065	1492.83	179.474	325.395	27.0283	756.329	1689.34	3.4843	15.8282	221.232	290.536	6.4487	18.0404	60.9034	39.5479	2.5146	48.8064	10.5732	90.9714
Lactobacillus_paracasei	16.7508	32.943	123.049	19.116	106.442	62.663	170.791	298.531	122.136	104.234	279.174	93.2048	7.2609	15.8781	31.2275	64.2447	137.512	122.974	68.8274	28.5385	153.279	17.9912	98.133	82.656	95.4812	99.9372	91.015	30.633	144.304	79.3917	77.5714	115.479	11.5038	31.6075	125.66	301.3	29.4566	312.841	60.8954	58.6545	37.0463	24.4744	325.524	79.0988	108.973	199.888	33.5722	99.7701	66.6912
Bacteroides_sp._CAG:875	130.383	0	242.598	215.684	224.557	141.931	72.0461	14.627	84.281	114.071	6.9325	0.2469	34.5564	1.9075	136.75	37.566	0	5.0975	68.75	151.223	0.6226	3.3009	1.9894	40.3437	0.6824	44.76	5.1517	226.115	1.7029	3.2086	103.56	6.1248	0.3381	4.3088	39.3581	16.4805	0	71.3514	9.2054	19.4674	4.0616	182.628	18.9853	55.8074	20.5459	200.805	27.7387	112.061	83.6603
Clostridium_sp._ATCC_29733	33.3374	10.2247	76.2536	46.9761	18.0158	52.2174	109.007	104.712	19.6955	193.112	46.9503	125.787	3.3373	2.1309	23.1986	16.0736	14.6765	47.0553	44.1996	35.8714	14.8829	19.9697	7.5615	16.1156	21.7237	22.0209	28.3238	15.5534	10.575	82.2084	47.2201	21.0774	1.158	5.1397	141.19	39.1273	2.5913	396.188	38.4742	73.0178	62.2104	4.1891	64.9749	31.8354	74.5353	37.8614	19.1741	51.2578	23.6455
Schaalia_turicensis	2.0664	0.9438	2.1096	2.2762	1.5332	3.3957	3.0815	1.4732	5.0725	1.0165	24.7628	44.4775	1.3615	1.3186	4.5405	5.1698	18.7879	11.5086	5.0721	9.3922	29.7677	8.2315	10.6267	27.3153	7.549	2.3626	75.7579	5.41	23.5171	2.5887	10.6855	5.293	5.2245	0.9518	2.0125	9.9261	20.9469	2.31	31.4174	21.0508	4.4625	1.0997	25.0391	5.643	6.3264	2.9022	12.4913	3.9373	18.5071
Citrobacter_werkmanii	1.909	3.3689	0	0.2693	0	0	2.9048	2.8045	0	20.9511	0	9.4249	28.5665	29.9111	0.4024	4.4451	89.5683	11.4334	10.3709	10.4833	2.9141	14.8722	9.3648	3.0071	10.3564	10.1017	18.3135	35.2994	186.801	21.0659	4.0728	191.536	27.5932	37.2644	5.1714	37.6008	212.766	0	0	49.7292	57.753	0.4038	0.2469	8.7522	9.0463	0.6867	5.8767	0.3549	9.6762
Lachnospiraceae_bacterium_VE202-12	15.3147	0	5.3243	3.0776	0.5528	0	3.8886	1.0623	11.8876	2.1989	19.2512	0.6593	0.6312	0	0	33.3181	0	0	1.0287	16.5751	25.7582	29.8126	0	3.6031	0.3266	0.3651	0	8.7774	17.6645	0.2545	6.421	0	0	0.8579	0.7256	2.0647	0	0.6246	22.2428	3.6431	0	1.1894	2.539	1.0615	0.8554	9.4175	0.386	9.7342	3.6896
Larkinella_knui	0.1422	0	2.3923	0	0.061	0	0	0	0.3028	0	0.1386	0	0.0697	0	0.1668	0	0.0311	0	0	0.118	0	0.121	0	0	0	0	0	0	0	0	0	0.7792	0.7116	0	0.4805	0	0	0.1379	0	0	0.2561	0	0	0	0.472	0.0433	0	0.0671	0
Desulfosporosinus_youngiae	1.7445	0	0	0.3931	0.1284	0	0.6771	0.6631	0.9556	0	2.8382	0.8559	0	0.0779	0	0.7178	0.2404	0	0	0.1752	1.0473	0.0718	0	0	0	2.7782	0	0.178	0	0	0	0	0	0	1.9572	0.0819	0	0	0.2239	0.1939	0.0737	0.236	0.1965	0.6784	2.9475	0	0.3691	2.0771	3.4331
Bacteroides_sp._OF02-3LB	22.0192	0	2.8684	31.3853	3.7999	5.5551	6.8638	1.6231	4.0958	4.2228	0.1631	0.095	5.3243	0	13.767	4.4547	0	0	3.5637	29.5577	0	0	0.2635	11.6314	0.4004	1.9249	0.1287	6.8024	0	0.2697	21.3345	1.5193	0	0.2075	5.5774	1.7135	0	1.7543	0	0	0.3285	7.6805	1.9598	14.7169	0.29	29.3774	0.0376	13.0255	1.5249
Escherichia_sp._E10V5	9.3511	6.716	0	0	0	0	4.5367	3.6147	0	17.2097	2.2785	42.6276	126.856	147.855	1.0284	10.1482	58.3934	39.9377	22.8686	36.3879	4.5912	59.0772	34.0507	12.7508	48.901	42.2359	67.0094	19.3428	20.1964	64.0954	2.3306	37.4036	108.275	87.1152	10.8637	2.2482	58.5024	0	0.841	8.6776	124.32	0.8095	0	18.0602	10.4782	0	2.1017	1.6562	42.5393
Murine_AIDS_virus-related_provirus	0.7632	1.4958	3.8366	0.2661	0.6373	0.5293	0.4804	3.5977	4.2171	3.4067	0	0	0	0	0	0	0	0	0	0	0	0	0	0	0	0	0	0	0	0	6.601	4.1254	1.8794	1.9289	4.8102	5.1775	3.6974	7.8319	3.2946	5.1191	2.6487	0.6	1.5857	0.8031	1.0478	1.8096	0.7789	1.1398	0.2502
Domibacillus_aminovorans	0.032	0	78.114	0.9296	0	0	0	0	0	0	0	0	0	0	0	0	0	0	0	0	0	0	0	0	0	0	0	0	0	0	0	0	0	0	0	0	0	0	0	0	0	0	0	0	0	0	0	0	0
Oceanobacillus_iheyensis	0.049	0	0	0	0	0	0	0	0	0	0	0	0	0	0	0	0	0	0	2.565	0	0	0	0	0	0	0	0	0	0	0	0	0	0	0	0	0	0	0	0	0	0	0.29	0	0	0	0	0	0
Moraxella_boevrei	1.1027	0	0	0.1423	0	0	0	0	0	0	0	0	0	0	0	0	0	0	0	0	0	0	0	0	0	0	0	0	0	0	0	0	0	0	0	0	0	0	0	0	0	0	0.5216	0	0	0	0	0	0
Clostridiales_bacterium_KA00134	0.275	0	0	0	0	0	0	0	0	0	0	0	0	0	0	0	0	0	0	0	0	0	0	0	0	0	0	0	0	0	0	0	0	0	1.0457	0	0	0	0	0	0	0	0	0	0	0	0.3709	0	0
Miniphocibacter_massiliensis	0.8036	0	0	0	0	0	0	0	0	0	0	0	0	0	0	0	0	0	0.6417	0	0	0	0	0	0	0	0	0	0	0	0	0	0	0	0	0.1405	0	0	0	0	0	0	0	0	0	0	0	0	0
Lachnospiraceae_bacterium_NK4A136	0.6704	0	0	0	0	0	0	0	0	0.3961	0	0	0	0	0	0	0	0	0	0	0	0	0	0	0	0	0	0	0	0	0	0	0	0	0.3921	0	0	0	0	0	0	0	0	0	0	0	0	0	0
Ruminococcus_sp._5_1_39BFAA	36.0683	90.126	62.7009	62.6789	93.6187	48.8087	148.165	140.808	34.6469	257.727	123.064	51.5012	19.3506	9.7746	475.531	53.9559	236.126	79.9736	73.6784	111.596	97.4335	74.8671	140.053	486.122	102.62	49.5916	112.307	94.1692	96.5262	136.318	143.72	66.5518	97.536	26.6882	93.9404	122.229	4.3832	407.741	356.59	186.614	59.5114	36.2804	296.948	63.8996	84.8073	61.2452	496.934	117.217	123.592
Catenibacterium_mitsuokai	7.7907	3.0765	57.9403	49.0619	19.802	16.5428	135.441	52.9797	8.7712	156.108	25.2448	106.711	18.5163	1.2758	72.5641	16.4683	10.7097	57.0717	72.9651	289.501	6.3349	7.0875	55.0232	115.08	48.2225	13.3034	26.9141	102.774	70.9704	13.8191	62.9669	7.8967	2.0768	2.8078	44.5512	31.4708	7.2763	206.879	13.8478	19.2733	5.605	66.2717	146.194	9.7425	20.9037	615.104	11.3165	103.354	5.1267
Salmonella_bongori	4.0911	4.4001	0	0	0	0	3.7806	1.4459	0	4.4895	3.4178	26.9227	59.8487	54.6772	0	7.294	14.5983	26.6251	12.1344	18.9217	1.6695	26.2565	12.884	3.9233	15.1149	16.3975	22.9361	10.8092	4.8087	25.2917	0.5826	14.5459	40.4304	15.8816	4.938	1.1241	14.5122	0	0	1.2397	51.2946	0.4047	0	11.5585	4.0748	0	1.0509	1.6562	17.4293
Streptococcus_ratti	0.3488	0.6413	0	0	0.3131	0	0	0.1504	1.9695	0	4.9577	5.3623	0	0.0673	0	0	1.0718	3.112	0	4.0307	0.252	0.2361	4.0616	5.2484	1.1477	0	0.8053	0	0.7808	0	5.4226	13.7802	0	0	0	2.6798	0	0	2.4952	7.8594	0.5998	0	5.0366	0.2858	1.5388	0.8452	66.417	1.9656	3.1
Coprobacillus_sp._TM10-10	0.1993	0	0.0963	4.8319	0.4199	0.6717	0.7737	0	0.2316	0.7656	0	0	1.0389	0.0301	5.5965	0	0	0	0.8683	2.7079	0.0388	0.2776	0.214	0.7299	0.1654	0.4622	0.1255	0.1058	1.163	0	0.1084	0	0	0.0435	1.1484	0.0523	0	0	0.1173	0.4036	0.047	0.6401	0	3.4608	0.1625	6.1607	0	1.3866	0
Enterococcus_sp._9E7_DIV0242	2.007	0	0	0	0	0	0	0	0	0	0	0	0.2193	0	0.0788	0	0.1499	0	0	0	1.5985	0	0	0	0.0681	0	0.5512	0.1665	0.442	0	0.0893	0.1014	0	0.1073	0.3782	0	0	0.2605	0.7613	0.1209	0	0	0.5294	0	0.1784	0	0.0513	0.1269	0.0453
Shewanella_unclassified	0.0149	0	0	0	0	0	0	0	0.0489	1.6117	0	0	0	0	0	1.608	0	0	0.0878	0	0	0	0	0	0	0.2251	0	4.4222	0	0	0	0	0	0	0.0372	1.5122	0	0	0	0	0.1616	0	0	0	0.1143	0	0	0	0
Ruminococcus_sp._AM34-9LB	7.7525	43.7433	58.3503	23.659	83.2923	95.5108	97.3937	146.818	32.1725	124.204	54.2484	23.1331	18.4369	39.4935	193.702	98.6204	149.964	76.5943	73.7244	29.2924	105.726	45.2681	129.498	156.562	73.4185	61.806	14.0285	28.1786	52.4698	92.0181	134.073	38.6207	26.6477	13.5277	52.369	119.031	0.1789	253.629	143.097	66.667	19.7635	28.0204	173.532	39.4583	88.4986	41.5218	110.897	66.1734	34.6202
Oscillibacter_sp._ER4	51.6134	23.2002	373.542	11.4811	35.6857	9.6206	273.668	227.766	31.7776	229.447	72.7255	40.9586	17.5577	1.3082	24.5615	9.1415	36.061	44.787	47.6366	115.47	9.0067	16.3597	18.1646	25.4479	11.2359	9.0504	17.0961	25.6156	6.6749	38.8366	51.3388	30.8352	10.4347	3.1849	8.3601	16.1316	6.6768	148.873	60.8922	78.8769	14.6345	7.6615	173.933	22.1412	47.7343	114.647	16.2297	194.288	21.1665
Lachnospira_unclassified	0.5271	3.5369	0	0.457	1.2312	0	0.8249	0.3943	0	0	0	0.4895	0.3124	0.1765	0	0.5189	0	0	0.2546	0	5.4639	0	2.0079	0.535	2.1824	0	0	0	0	0	1.2712	0	0.1076	0	0	0	0	0	0	0.6762	0	6.4023	6.2835	0	0.635	0	0.5732	0.4517	0.3223
Parabacteroides_johnsonii_CAG:246	4.0071	0	14.3969	13.4392	83.7187	36.1537	21.9775	5.5131	29.3129	55.1545	0	1.1581	5.4651	0	7.5755	8.3776	0.9716	0	16.6711	26.8873	0	0	0	11.0849	0	2.0259	1.2101	35.6984	0	0	33.4552	0	0	0	5.9366	2.4566	0	64.1126	0.2341	0.8751	0.9476	20.9157	7.163	2.1077	2.0174	160.722	0.3941	9.5032	2.3317
Eubacterium_sp._AM47-9	0.2129	0.0958	0	0.2756	0	0	1.2249	0.2997	0	0.1032	1.0607	0	0.0857	0.0588	0.0302	0.5524	0	0	0.0644	0	0	0.0711	0	0	0	1.4219	0	0	0	0	0	0	0	0	0.6775	0.2987	0.6255	0	0.0742	0.0427	0.0452	0.222	0.3178	0.255	1.1569	0.5677	0.1545	0.9967	1.8754
Cuspidothrix_issatschenkoi	0.2966	0.0504	0.3378	1.7768	6.7103	5.9206	4.6052	0	0	0	0	0	0	0	0	0	0	0	0	0	0	0	0	0	0	0	0	0	0	0	0	0	0	0	0	0	0	0	0	0	0	0	0	0	0	0	0	0	0
Fomitopsis_pinicola	0.063	0.1479	0.171	1.0133	2.9166	1.5393	4.0383	0	0	0	0	0	0	0	0	0	0	0	0	0	0	0	0	0	0	0	0	0	0	0	0	0	0	0	0	0	0	0	0	0	0	0	0	0	0	0	0	0	0
Clostridium_sp._Marseille-P3244	2.7015	0.0813	7.5297	0.9478	1.7565	0.2492	11.6347	14.5357	1.0359	5.4591	2.7817	0	0.095	0.0568	0	0.5827	0.1275	4.6966	0.6015	1.0844	0	0.099	1.6763	2.6384	0.5924	0.4946	0.2286	0	0.1588	0.2871	1.4227	0.3432	1.7948	0.309	0.8008	0.3488	0.1498	150.234	0	0.2052	1.0295	0.2674	65.2396	2.2727	0.0966	0.9693	0.5604	1.9145	0.7181
Bacteroidales_bacterium_43_8	97.1561	0	203.912	182.84	92.2376	86.6278	77.6258	13.1172	55.6107	153.243	7.5318	0.9027	25.1476	0.1925	67.6948	22.0968	2.7597	3.8649	47.9759	210.329	1.0441	0.4441	0	29.7224	0	25.5226	5.5603	47.3142	0	0.8047	107.471	1.6234	0.5164	0.9619	36.4802	2.1836	0.2633	136.786	1.022	9.734	1.1806	59.2328	40.1998	15.6273	16.3803	117.852	5.1042	89.2243	5.4896
Methanosarcina_mazei	1.7602	6.379	0.1503	1.4081	0	0.6666	4.1708	4.3026	0.1807	12.0443	5.9572	8.9496	83.2302	89.1169	0.972	12.0744	40.568	31.673	19.1786	5.2845	4.7904	44.7054	22.1774	7.3911	24.1938	26.1142	39.1002	5.9203	19.4487	46.8562	1.0789	6.6948	122.312	70.8758	7.1873	3.2545	49.9575	0.8502	0.3744	4.5468	77.5474	0.8382	0.4608	12.6561	14.6319	1.2611	1.7949	5.6069	24.8499
Butyricimonas_synergistica	0.0948	0	5.7478	0	0.0983	0.43	1.163	0	0	3.5082	0.5412	0	1.4075	0	4.3038	1.2944	0	0	0.3049	2.7272	0	0	0	0.1369	0.062	0.0649	0	3.7867	0	0	1.9221	0	0	0	0	0	0	3.14	0.0598	0	0	0	0.5269	0	0	10.1607	0.1466	4.5696	0
Firmicutes_bacterium_HGW-Firmicutes-2	18.8906	0	0.7514	0.0608	0.7645	0	7.2441	11.4387	1.2647	0.8689	4.1344	9.119	0	0	0	0	0	6.6758	0.271	0.3169	33.4441	0.6497	12.7579	0	1.4197	0.7934	16.0596	2.3949	0.698	0.8047	0	1.8853	0	3.2547	0	2.0397	0	0.7405	0	1.7995	0	0.8813	2.6755	33.2424	6.1686	1.7056	0	0.3606	0
Escherichia_sp._MOD1-EC5433	1.3894	2.8315	0	0	0	0	2.0544	2.9463	0.4227	9.1484	1.5477	9.296	29.176	52.852	0	8.5087	23.224	21.5787	8.7177	9.8865	0.7088	24.5226	15.7838	5.3298	24.1569	18.0569	26.4236	5.9896	12.0852	35.5352	1.3852	6.528	50.5706	41.8015	6.876	2.4815	25.7216	0.2887	0.1428	1.6841	47.0276	0	0	8.4644	5.3379	0	1.7845	1.1249	12.4407
Clostridium_sp._Marseille-P299	196.203	0.6015	1.5443	0.3761	14.4978	0	1.7081	1.7467	0.1201	0.2017	51.2935	8.5241	0.6501	0.3799	0	1.8321	0	60.0694	0.0901	0.293	1.0397	1.1378	0.0372	0.3496	0.0858	6.0657	0.4231	0.7524	1.3126	0	0	0	1.1558	0.1441	7.0713	2.5803	0	0.5045	0.1951	0.1771	0.268	6.8985	134.014	2.2856	9.0839	0	2.9348	9.4256	3.7967
Clostridium_sp._CAG:1024	0.0184	0	3.2281	0	0	0	0	0	0	0	0	0	0	0	0	0	0	0	0.4851	0	0	0	0	0	0	0	0	0	0	0	0	0	0	0	0	0	0	1.7674	0	0	0	0	4.8981	0	0	0	0	0	0
Anaeromassilibacillus_sp._An200	65.4846	0.2939	19.734	38.1406	23.7894	51.8852	61.6266	61.2518	48.4322	62.4405	53.0088	307.481	6.7157	14.9335	38.1477	21.5899	44.3939	14.6332	40.6799	172.905	46.7677	23.382	18.9013	21.6526	47.8534	72.778	227.758	17.0786	87.4338	179.05	120.157	74.2819	0.531	171.738	179.139	30.7142	2.7113	145.849	10.1529	116.496	10.0419	29.7154	210.617	170.263	273.169	53.3127	44.7827	194.026	40.8992
Prevotellamassilia_timonensis	11.99	0	24.4277	9.3108	9.757	23.0658	4.7677	1.024	6.4133	15.1312	2.0847	7.0931	2.1088	0.0939	7.8544	4.324	0	0.3514	5.5731	21.8349	0.0379	0.3176	0.3744	2.5715	0.086	20.452	0.7373	8.5635	0	0.1006	11.8234	0.2011	0.0191	0.113	3.2243	1.3994	0	11.7651	0.1628	1.445	0.1731	13.6875	36.5327	1.0392	1.3246	13.544	0.6411	16.5509	3.1933
Eubacterium_maltosivorans	23.7452	0.1272	4.3587	11.3701	15.4715	3.3894	67.3267	85.1859	27.4159	88.0698	29.5185	29.7063	1.883	0.6651	10.3538	10.8601	6.329	56.8605	15.9471	44.7096	11.5875	6.5344	16.5652	8.3143	16.2752	14.2173	0.5488	4.7556	16.4309	1.9449	17.5623	13.3448	0.6619	7.1253	5.4444	38.3415	4.1507	26.7686	109.258	2.8365	6.2574	4.234	5.9746	7.2426	20.9046	31.6762	0.9989	14.8669	4.652
Klebsiella_sp._LTGPAF-6F	0.2953	0	0	0.1587	0	0	1.1461	0.274	0	0	0	0.5101	0	1.5938	0	0.7211	0.5823	0.4586	0	0	0.1582	0.1131	1.0462	0	1.3477	0.1883	0.1704	1.5091	0	0.5252	5.299	0.7874	0	1.4161	0.1871	0.426	0.3437	0	0	0.2349	1.4363	0	0	0	0	0	0	0	0
Acidovorax_sp._NB1	2.0903	2.4159	10.1646	0	0.2418	0	1.3919	1.183	0	0.4592	0	1.062	0.3514	1.853	0.586	1.2325	1.7288	0.8399	1.8138	1.6375	0.683	0.34	2.2589	0.7769	0.3637	0.6098	9.5669	28.51	209.044	4.7481	2.8603	148.866	0.2824	1.1943	0.1956	6.5384	117.784	0.8695	0.505	17.161	0.0517	0	1.4138	0.2216	0.2381	0.2185	3.4118	0.4757	0.5773
Clostridium_neonatale	0.2672	0	0	0	0	0	0.5185	0.1239	0	0	0.1953	0	0	0.2219	0	0.8698	0	0	0	0.3743	0	0	0	0	0	0.937	0	0	0	0	0	0	0	0	1.0158	0	0	0	0.4325	0	0	0	0	0	2.6944	0	0.0901	1.7035	1.7725
Trabulsiella_guamensis	0.2457	0.2022	0	0	0	0	1.7609	1.6135	0	0.5808	0.2211	1.3498	2.8898	3.7987	0	0.7693	3.355	0.411	1.3586	1.483	0.162	1.0423	1.3395	0	1.0353	0.7715	2.1383	0.8281	1.3065	2.3869	0.0565	1.0586	3.1768	10.1983	0.0958	1.0362	1.9803	0.0825	0	1.0225	3.6779	0.0785	0	0.9814	0.2824	0	0.102	0	1.0893
Paenibacillus_sp._IHBB_10380	0.0166	0	7.851	0	0	0	0	0	0.1061	0	0	0	0	0	0	0	0	0	0	0	0	0	0	0	0	0	0	0	0	0	0.422	0	0	0	0	0	0	0	0	0	0	0.0172	1.865	0	0	0	0	0	0
Thiocapsa_roseopersicina	0.0367	0	0	0	0	0	0.9976	1.3626	0	1.8334	0	0	0	0	0	0	0.4345	0	0	0	0	0	0	0	0	0	0	1.2867	0	0	0	0	0	0	0	0.8475	0	0	0	0	0	0	0	0	0	0	0	0	0
Anaerotruncus_sp._1XD22-93	50.6153	15.771	92.5175	15.1438	80.6077	35.3512	142.357	244.77	60.7869	160.34	123.1	70.2123	5.0579	5.3861	70.5051	111.626	19.2062	209.35	61.9669	86.9035	24.2117	26.2129	131.431	35.2661	144.976	57.491	97.5446	91.2393	25.5387	70.5735	64.5315	115.087	99.4466	40.0499	66.696	29.5931	2.3776	153.305	59.847	440.215	37.0108	16.1955	124.685	65.2586	105.447	64.5579	30.2077	242.194	114.615
Clostridium_sp._OM05-9BH	11.8293	4.6616	2.6038	0.7267	0.4051	3.1104	25.1855	19.8255	0	9.3431	2.646	0.4338	0.1108	0.7474	0.3981	0.491	10.7407	3.5739	1.2589	2.5324	50.062	0	1.43	1.135	0.7739	3.1598	0.3473	0.6607	2.5941	14.5739	6.7662	0.5011	1.5607	1.2599	0	1.196	0.7022	12.3728	46.2815	0.2399	11.1188	0	5.7764	0.6288	0.9001	10.7508	9.0286	4.006	3.0276
Shigella_sp._MO17	1.3268	0	0	0	0	0	0	0	0	0	0	1.7463	0	0	0	0.3857	0.1869	0.2944	1.4758	0	0	0	0.4477	0	0.2163	0	4.4851	0	0.7018	0.5056	0	0	0.048	44.9936	0.4805	0	0	0	0	0	0.0615	0.1969	0	0	0	0	0	0	0
Candidatus_Riflebacteria_bacterium_HGW-Riflebacteria-1	0.0279	0	0	0	0.2158	0	0	0	0	0	0.817	0	0.4107	0	0	0	0	0	0	0	0	0	0	0	0	0	0	0	0	0	0	0.6706	0	0	0.1416	0	0	0	0	0	0.0362	0	0	0	1.2524	0	0	0	0
Ilyobacter_polytropus	0.0577	0	0	0	0	0	0	0	0.7045	0.1694	0	0	0	0	0	0	0	0	0	0.0824	0.0473	0	0	0	0	0	0.1018	0	0	0	0	0	0	0	0	143.292	14.8334	0	0.0476	0.2438	0	0	0	0	0	0	0	0	0
Klebsiella_variicola_CAG:634	6.8515	7.2468	0	0.3867	0.3473	0	7.7473	6.6733	0	21.2733	1.0516	34.3782	51.0949	58.057	0	5.6498	53.9016	26.8671	15.2505	22.0343	2.4658	30.4613	23.4036	11.4984	23.6777	24.172	44.0456	46.8429	262.864	46.3725	4.5715	139.544	51.047	79.1852	7.6122	42.9582	158.616	0	0.1941	35.8166	69.1573	0	0	9.2357	9.6722	1.479	4.1711	1.1466	21.5696
Yersinia_unclassified	0.1711	0.1017	0	0.3678	0	0.9755	0.6639	0	0	0	2.0007	2.5609	3.2687	0.9943	0.6772	1.1138	5.0598	3.4536	1.4343	3.195	0.9162	29.7351	0.606	3.0143	1.7565	2.8359	2.1719	2.4976	5.9111	1.3689	0	1.5965	29.0926	13.2271	1.084	0.2468	0.1991	1.1198	0	1.0885	14.1995	0	0	4.7573	0	0	1.3841	0.7271	0.6485
Thermoanaerobacter_thermohydrosulfuricus	0.6422	0.1183	0	0.2693	0.3225	0	0	1.5491	0.2667	0	0	0	0	0.0826	0	0	0	0	0	0	19.3947	0	0	0	4.4266	0	0	0	0	2.4768	0	1.1937	0	0	0.8465	0	0	0	0	0	0	0	0	0	0	0	0	0	0
Clostridium_sp._CAG:914	0.2393	0	0	0	0	0	0	0	0	0	0	0	0	0	0	0	0	0	0	0	0	0	0	0	0	0.8385	0	0	0	0	0	0	0	0	0.5555	0	0	0	0	0	0	0	0	0	2.2921	0	0	0	0.3323
Shigella_sonnei	754.226	688.197	11.7931	71.1754	17.6439	3.8432	581.657	466.84	6.6151	1618.33	335.614	2844.34	12044	9942.29	10.5498	1055.25	4691.46	3290.56	2047.14	2101.16	232.298	3748.08	2574.13	691.873	3001.06	2716.93	3843.43	1525.74	4892.07	5077.53	132.069	3773.78	6982.65	7064.26	764.144	614.666	5566.89	36.455	23.2907	875.712	8415.14	19.7729	22.5412	1460.99	1104.94	68.2549	170.451	303.973	2826.97
Bacteroides_cellulosilyticus_CAG:158	11.9471	0.41	179.455	64.505	35.2639	87.5758	18.5465	5.6262	19.0847	74.1225	1.3735	2.1949	7.9462	1.7322	23.199	11.8709	10.4015	5.5806	47.7655	60.2502	1.2316	1.4087	5.2675	7.5993	1.0494	19.6329	3.3999	36.8385	12.4867	1.5126	29.3238	3.3856	1.0475	0.9648	7.7017	7.3322	1.0706	16.836	0.8431	9.145	4.3731	56.8306	20.8312	3.3086	8.8522	94.214	12.4431	23.3746	10.8556
Bacteroides_sp._CAG:927	8.6046	0	1.2023	19.2804	0	0.258	0	0	1190.33	3.5234	3.9318	75.9206	0.1396	0.0451	0.4747	0	0	0	0.3252	0	0.1939	0.3846	0	8.6508	0.2167	88.5665	14.5857	0	0	0	5.544	0	0	0	0.3441	0.3916	0	8.7781	0	1.0077	0	109.485	40.818	0	0.3413	15.5322	0	28.0926	0
Chloroflexus_aggregans	0.5418	0	0.16	0.0647	0	0	0.1168	0.2234	0	0	0	1.3866	0.0885	0	0	0	0	0	0	0	0.129	0.1844	0	0	0	1.0748	0	0	0.1486	0	0	0	0	0.1083	0.763	0	0	0	0	0	0	0	0	0.3907	1.2592	0	0	0	0.1369
Bacteroides_congonensis	1.6232	0	102.336	24.4613	13.6776	21.0514	2.2077	0.8428	6.4594	88.4096	1.4036	1.0649	3.5974	0.144	18.1235	2.3924	0.0428	3.4343	3.617	27.219	0.0902	0.9629	0.2241	18.8855	0.4685	3.5299	0.1752	6.894	0	0.0964	18.1141	0.5235	0	0.065	9.7901	0.2704	0	17.2226	2.4039	0	0.5565	1.6488	3.4323	12.4394	0.0694	60.507	3.7072	9.388	0.0618
Provencibacterium_massiliense	1.1308	0.2223	18.3631	0.8805	0.8357	1.2117	0.5605	0.7885	0.0813	0.9627	3.8152	0.7047	0.4401	0.3106	0.168	1.5973	0	4.3963	0.3765	0.5954	0.7919	1.7943	1.5461	0.4708	0.1162	3.7231	0.6476	0.5251	0.3142	2.3961	9.8732	1.6306	0.568	0.2189	4.568	0.2938	0.2177	0.9443	3.0801	1.1356	0.682	0.1058	14.3032	0.0708	5.8027	5.3125	2.0519	5.4786	0.3994
Bacteroides_sp._14(A)	0.0659	0	1.191	0.2268	0	0	0	0	0.1684	0.557	0.0771	0	0.2132	0	0.0696	0.0215	0	0	0.4737	5.9096	0	0	0	0.3319	0	0.1681	0	0.3465	0	0	0.5914	0	0.0133	0	0.0334	0.6085	0	1.3808	0.0854	0	0	0.0822	0	0	0	4.6261	0	3.194	0
Salmonella_sp._HMSC13B08	0.248	0.3076	0	0.0116	0	0	0.2511	0.14	0	0.4969	0.063	0.7946	2.2345	2.3187	0	0.2369	1.1056	0.586	0.4907	0.6041	0.0577	1.0238	0.5984	0.2171	0.6766	0.7562	1.1449	0.425	0.9048	1.2367	0	0.46	1.9537	1.5833	0.3826	0.2488	7.3663	0	0.0233	0.0858	1.9018	0.0112	0	0.5297	0.4188	0	0.0436	0.1833	0.9074
Spirochaetae_bacterium_HGW-Spirochaetae-4	0.0592	0	0	0	0	0.1688	0	0	0	0	0	2.999	0	0	0	0	0	0	0	0	0	0	0	0	0	0	0.4099	0	0	0	0	0	0	0	0	0	0	0	0	0	0	0	0.175	0	0	0	0	0	0.0897
Clostridiales_unclassified	44387.6	22710.4	24880	10577.6	35786.2	35919.9	59684.9	71476.7	23971.1	40736.1	68209.2	18716.2	3661.75	9171.7	51703.1	40269.7	12895.7	67994.7	28314.1	23842	35240.3	34761.4	67048.5	39199.3	38135.5	22826.7	35308.2	62155.6	23564.7	42377.7	37750.8	37940.9	8662.6	35692.9	53215.8	44263.4	19782.4	65547.4	25328.4	60148.2	25170.3	13763.2	57221.4	52033.9	54080.3	21882	28844.7	54737.1	39059.3
Roseburia_sp._OF03-24	12457.1	3829.89	173.257	101.051	105.739	65.3844	722.163	686.362	231.057	3342	9013.58	111.533	92.9449	165.856	122.477	3227.61	185.925	583.622	2296.35	152.536	3863.59	6906.46	213.389	3591.68	1284	322.911	113.449	281.786	980.667	1016.56	2436.54	581.098	41.8832	52.991	123.425	2850.91	6.8407	350.909	914.632	2032.67	122.777	1744.41	699.801	5050.95	287.582	709.383	99.0952	791.26	72.06
[Clostridium]_scindens	151.915	52.1979	467.963	84.1071	202.192	312.831	624.149	641.12	119.9	380.705	347.819	161.568	44.8063	149.511	169.853	184.045	76.9391	259.543	209.489	327.066	322.479	160.797	233.463	183.233	244.611	372.424	130.709	188.548	104.305	249.905	495.527	433.822	55.1817	91.2726	315.644	158.628	72.3465	685.408	217.531	580.259	138.217	99.2461	807.186	191.044	504.488	203.833	60.7426	470.979	249.051
Bacteroides_vulgatus_CAG:6	229.932	1.0139	261.362	710.093	299.39	281.072	127.333	13.7296	283.239	97.6838	16.5201	6.0054	42.6296	0.1737	240.083	97.5307	3.7498	2.6704	94.3487	107.622	0.92	2.9185	11.2418	117.381	2.3156	54.4837	10.5583	183.844	2.6317	1.7865	56.8916	9.815	0.1732	10.8003	48.5308	40.3005	0.3423	62.6094	3.3192	6.2255	11.0439	507.481	35.3954	88.7461	20.923	267.584	7.3537	188.19	162.393
Lachnospiraceae_bacterium_oral_taxon_082	67.9126	9.3377	67.8653	14.307	68.1913	11.9088	146.573	179.115	28.9001	56.8263	56.4928	28.6883	3.9819	34.9285	127.277	26.025	12.8088	83.8981	87.0777	153.292	96.8311	19.0433	114.085	20.5849	451.343	77.8797	30.0484	26.3015	10.9234	56.1452	236.751	51.3253	4.448	15.2631	19.9433	28.1848	13.3888	487.942	18.1458	131.01	9.0814	14.0853	989.13	154.084	121.53	80.9483	31.9135	130.181	74.8414
Sulfuritalea_hydrogenivorans	1.1665	1.1011	2.4612	3.1298	4.3441	2.0752	14.1237	4.9105	21.1355	14.756	0.7738	3.6574	7.4885	12.3065	1.5717	5.5377	33.1398	8.6315	5.0721	5.1904	0.4253	9.12	5.3134	1.3325	5.2843	6.4569	8.8588	15.4571	43.7679	9.0603	2.3746	53.1061	16.0754	12.655	1.5094	23.3341	32.0364	3.1762	3.5702	14.9461	16.0552	6.598	2.3474	2.9442	3.7563	3.265	1.0707	1.9687	5.4177
Firmicutes_bacterium_ASF500	3.4822	22.2946	2.9987	0.602	12.6471	2.0687	7.7518	5.6744	0.515	8.6875	2.873	11.3354	28.4663	41.6793	4.0427	9.7901	12.0178	12.4428	8.4697	20.0188	3.2241	12.2805	9.2142	2.325	17.1655	13.6205	16.2021	8.69	9.773	17.1145	20.3105	19.9609	28.2437	21.5734	6.9724	2.5252	12.5449	16.3898	0.5537	5.5106	29.1389	0.5465	9.5335	4.8674	15.2983	3.5361	1.5935	4.5326	15.5649
Streptococcus_phage_Javan311	0.0413	0	0	0	0	0	0	0	0	0	0	0	0	0	0	0	0	0	0	0	0	0.0632	0.2923	0	0.1883	0	0	0.1205	0	0	0	0.22	0	0	0	0	0.096	0	0	0.1313	0	0	1.2197	0	0	0	0	0	0
Actinomyces_sp._oral_taxon_178	0.5183	0.0344	0	0	0	0.2886	0.1122	0.161	0	0.1111	0.8456	1.0658	0	0.1441	0.8015	0.5649	0.3422	0.9432	0	0.2161	3.3459	0.4429	0.6831	1.3105	1.0559	0.2582	6.839	0.8446	1.2136	0	0.346	0.1928	0.1757	0.104	0.1466	0.292	1.2455	1.0728	4.504	2.6225	0.2063	0	1.7101	0.7565	0.5185	0	1.95	0	1.1402
Alistipes_sp._5CPEGH6	0.306	0	40.9492	194.102	8.6677	27.1962	11.6415	1.2492	6.7817	41.2326	0.9843	0.2271	3.8316	0	0	0	0	0.7879	0.6328	50.5199	0	0.1719	0	0.2596	0	0.1431	0.7046	1.3108	0	0	11.4072	0	0	0	8.5543	0	0	15.219	0	0	0	2.9141	1.5989	0	0	27.2944	0	72.6939	4.5092
Haemophilus_sp._HMSC71H05	0.2751	0.0246	0	0	1.4595	0	0	0	0	9.1922	0	0.2743	0	0	0	0.3174	0.6015	1.9468	0	0.4243	0	1.7661	0.9837	0	0.2441	0	0.0334	0.0724	0	0	0	62.1093	0	0.3424	0.0367	0	0	0	2.8915	0	0.0188	0.5995	0.8858	0.1183	0.0735	0	0.1426	2.234	0.1705
Clostridium_sp._OF10-22XD	67.5776	0.2138	11.6206	0.3678	6.0818	8.0118	14.6995	10.8305	1.2654	6.9828	23.7119	0.5905	0.4733	1.5452	3.2972	0.9684	1.1318	6.3632	22.9899	3.6119	2.0898	0.2754	1.6358	3.23	4.8605	3.9848	0.4572	2.9486	1.5392	1.4538	5.2584	8.3335	0	0.2695	7.9553	1.6195	0.4186	76.0572	10.7048	0.6283	0.5831	0.3458	14.9116	1.8428	18.61	3.0579	0.2851	17.7461	0.9812
Kluyvera_unclassified	0.0508	0.0604	0	0	0	0	0.1972	0	0	2.3423	0	0.2341	0.6723	1.0972	0	0	6.013	0.1579	0.1217	0	0	0.0778	0.4802	0	0	0.1296	0.2346	0	0.7527	0.5423	0	0.1355	0.2572	0.5483	0	0.1466	0.2366	0	0	0	0.3296	0	0	0.0942	0.3037	0.2787	0	0	0.3083
Bacteroides_sp._AM56-10ce	5.6113	0	11.3674	92.1487	23.5607	24.5811	18.0429	5.0477	29.424	36.9729	2.8225	0.6478	26.0915	0.2405	106.754	12.5992	0.2874	2.1448	19.1897	183.381	0.5992	0.8195	2.1576	10.1032	1.2131	12.2645	0.3395	29.4276	0.1111	0.4723	24.7013	10.4536	0.0912	1.4193	37.6613	5.1903	0.0752	17.9538	0.5779	0.2278	1.4462	12.3951	5.7577	116.103	1.7671	245.193	0.4146	42.1981	2.5106
Coprobacillus_sp._AM42-12AC	3.09	0.0878	3.4083	14.9832	1.1844	0.7691	4.258	5.3302	8.5896	0.638	5.3218	1.8279	0.624	0	0.089	3.3337	0.2912	0.4862	11.0094	3.9631	3.361	4.2302	1.3874	3.3505	0.379	1.0356	0.1278	5.1668	8.6556	3.151	23.9007	0.2953	0.0187	0.2213	13.2392	0.4864	0	46.9273	0.1195	0.1762	0.1634	9.6236	23.2267	0.3126	0.8824	2.8335	0.2317	0.6276	1.994
Rothia_dentocariosa	2.2442	0.7781	0	0	1.4446	4.7993	0	0	0	0	12.5774	15.5075	0	0.3106	5.6769	1.37	2.2128	2.9046	0.8961	2.4453	24.8423	5.4423	5.7426	18.3612	1.2803	0.2385	25.6884	0.2731	7.3861	0	3.0764	0.7481	3.124	0.6726	2.8443	0	10.6665	2.4486	43.5959	18.4461	3.1535	0	5.5294	5.8948	3.0736	1.0255	5.8007	0	7.3735
Streptococcus_sp._HSISS1	5.9021	2.9772	1.1379	0	0.1092	0.6501	0.7417	0.7165	2.8723	0.3081	28.4239	67.9057	0	0.4985	1.0622	0.7189	17.7563	22.3202	1.1121	60.3124	1.985	7.9747	32.8106	66.3288	17.0822	1.3444	11.0532	3.9934	3.8333	0	36.4552	112.088	0.8831	0	0.2659	31.3631	1.9979	0	13.0803	67.5234	2.4701	1.1136	91.1587	7.8403	8.4827	2.817	115.827	41.8334	25.725
Peptostreptococcaceae_bacterium_ZHW00191	3.1316	0	0	0.533	0.7829	0	0.164	0.9545	1.8082	0.1217	0.0618	0	0	0	0	0.396	0	0	0	0	0.2606	0.1242	0.0499	0	0	0.2068	0.0488	0	0	0.0376	0.1264	0	0	0	0.8973	0.0609	0	0	0.4375	0	0.0526	0.0842	0.4372	0	2.0593	0	1.3975	2.0678	1.4754
Prevotella_sp._kh1p2	0.013	0	18.7043	0	0	0	0	0	0	0	0	0	0.0192	0	0	0	0	0	0	0	0.0279	0	0	0	0	0	0	0	0	0	0	0	0	0	0	0	0	0	0	0	0	0	0.0771	0	0.039	0.3574	0	0	0
Anoxybacillus_flavithermus	1.2553	0	0	0.6557	0.4711	0	0	0.4526	0	0	0	0	0	0	0	0	0	0	0	0	0	0	0	0	0	0.3632	0	0	0	0	0	0	0	0.1707	0.7729	0	0	0	0	0	0.5541	0	0	0	0	0	0	0	0.3239
Blautia_sp._AM16-16B	0.1234	0.3633	0.3227	0.4243	1.0709	1.5006	16.5678	8.0631	0	21.0869	1.811	0.5688	0	0.2269	0.2057	0	2.6223	3.1152	0.8922	2.5556	11.1489	0.5672	4.5513	4.6774	1.4087	1.1822	1.1354	2.3525	2.4481	11.4719	5.8447	1.8243	1.2622	0	1.2467	1.9738	0	5.9801	11.2711	2.3087	1.0895	0.1577	8.2822	0.8875	3.9463	0	4.3207	6.0182	2.1009
Escherichia_fergusonii	134.942	72.658	1.503	7.8029	0.073	0.4089	53.5354	40.261	0.1859	147.492	34.2261	408.181	1167.9	907.231	1.2366	98.7591	422.006	337.916	217.362	253.917	26.5359	383.3	244.393	68.0247	329.91	284.868	385.065	197.698	540.78	503.4	15.8829	443.214	891.742	676.064	88.2109	53.5609	670.592	5.9538	2.1148	103.815	942.586	3.3031	6.1139	164.285	119.449	7.2685	18.6408	16.9437	269.904
Citrobacter_sp._KTE151	0.7667	0.6431	0.0729	0.0875	0	0	0.1048	0.2547	0	3.7176	0.1605	4.2601	5.9871	7.1858	0.0725	0.9369	12.8805	3.6842	1.576	2.355	0.2048	4.468	3.2274	0.5457	2.4948	2.4409	3.9824	1.8273	3.2498	4.0368	0.2463	1.9006	6.4664	3.8083	0.7918	2.9945	3.7272	0	0	2.8161	12.7465	0	0	1.7605	7.0292	0	0.111	0.35	2.5312
Rothia_sp._T40-1	0.0932	0	2.3965	0	0	0	6.3365	13.5598	4.6695	0	11.1851	0.429	0	0	0	0	0.3677	0.6749	0	0	0.0666	0	0.1466	0.3125	7.9117	0.0397	79.1981	0.4533	6.1366	0.966	0.4181	0	0	0	0	0.2241	0.289	0	0.7369	12.1506	0.0807	0	3.397	0.173	2.9249	0	0.4604	0	0
Clostridiales_bacterium_Marseille-P2846	2.1116	0.02	19.2046	0.0956	0.0857	0	14.1729	11.534	1.3358	22.3071	1.4715	0.9511	5.0729	0	0	0.1372	72.5404	15.271	1.004	23.2522	0.547	0.154	0.0685	0.1452	0.1127	1.6923	0.0815	0.3875	0.6333	1.3627	7.0354	0.1184	0	0	0.487	0.285	0.2131	78.5965	0.42	0.0536	0.2673	0.1245	105.204	0.5568	3.756	11.0968	0.4868	25.339	0.4913
Bacteroides_sp._CAG:702	35.1391	0	41.1193	101.528	50.3653	43.1451	15.1946	0.121	42.3237	15.133	2.2357	0.2254	7.5621	0	26.5669	18.0624	0.4191	0.6601	11.6443	2.7632	0.9106	0	0.251	9.5368	0.3169	10.9296	1.5836	33.2022	0	0.436	13.5772	2.3961	0	3.8259	1.6749	2.9232	0	6.4882	1.374	0.2076	2.5604	70.411	14.3307	14.1836	0.5124	28.4378	0.3454	28.4308	24.4901
Treponema_brennaborense	0.503	0	1.1493	0.3226	0	0	1.0189	1.3917	0	0	1.4062	0	0	0.2491	0	0.6716	0	0	0	0	0	0	0	0	0	1.7219	0.1732	0	0	0	0	0	0	0	1.521	0.1082	0	0	0.438	0	0.0486	0.1558	0	0	1.3448	0	0.9104	0.3845	2.0473
Anaerostipes_rhamnosivorans	13.5659	8.2738	1.2507	6.814	3.1691	5.0309	2.1089	2.2687	9.5686	1.4063	5.5348	75.2083	0	0.1702	0.5698	1.0052	1.2263	4.8688	5.0834	1.1559	19.5259	14.9776	7.8996	14.3063	8.1494	11.4613	8.8938	3.6064	7.5737	2.837	4.2364	2.5994	0.1049	10.2705	7.77	17.0902	7.0671	0.8738	0.9436	9.8932	1.7895	1.7571	6.2738	0.8536	7.3512	0.1894	6.9792	8.9691	5.3936
Streptococcus_sp._CM6	0.0734	0	0	0	0	0	0	0	0	0	0	2.4526	0	0.122	0.0969	0	0.5793	0	0.088	0	0	0.0562	2.5151	0.1849	0	0	0.2543	0.1072	0.5438	0	0	0	0	0.088	0	0.4237	0	0	0	0.9346	0.0476	0	0.4343	0	0.1097	0	0.099	0	0.4454
Butyricicoccus_sp._OF10-2	0.1486	3.7791	0.2452	2.3652	0.9645	3.8153	0.2773	1.7856	0.2948	0.859	0.5659	0.2125	0	0.0766	4.9592	2.4742	0.1365	2.6893	0.1105	0	0.0741	1.1891	2.6973	0	1.5793	0.7944	0.2947	0.0674	0.2352	0.4718	2.4252	0.3076	0	0	4.4442	0.3661	0	0.3687	0.2988	0.1101	2.4537	0.1917	0.5546	0.7127	2.4257	0	0	1.6657	0
Rhodotorula_toruloides	0.0323	0.0384	0.3435	0.4865	1.3731	1.6588	2.007	0.2399	0.413	0.2483	0	0	0	0	0	0	0	0	0	0	0	0	0	0	0	0	0	0	0	0	0.0967	0.0862	0.0327	0	0.0819	0.1865	0	0	0	0.1028	0	0	0	0	0	0	0	0	0
Desnuesiella_massiliensis	0.8692	0	0	0	0	0	0	0.6673	0	0	0	0	0	0	0	0	0	0	0	0	0	0	0	0	0	0	0	0	0	0	0	0	0	0	0.6078	0	0	0	0	0	0	0	0.3545	0	0	0	0	0	0.0909
Ruminococcus_sp._AF17-11	21.622	833.088	436.929	18.9432	1055	979.448	121.067	170.559	191.861	644.168	213.759	14.7954	11.4218	2048.44	472.402	99.4087	1609.84	244.434	932.599	355.569	3344.2	164.26	650.025	505.191	4329.96	2617.26	42.1155	22.0558	21.8687	256.978	168.052	1511.38	148.393	12.8452	2490.04	199.13	19.0986	66.3027	4119.06	1260.59	182.423	27.7301	403.522	283.235	1297.91	227.858	5865.84	106.102	24.1897
Shigella_boydii	159.182	181.419	2.7583	10.9605	4.1621	0.8614	127.529	98.9952	3.638	329.489	83.8328	500.364	2448.27	2345.85	4.161	252.662	1002.12	801.638	512.126	518.946	58.2181	1080.22	614.633	169.178	705.557	860.426	1035.07	269.388	576.347	1186.05	23.0423	555.117	1794.72	1526.36	197.327	56.3165	980.463	13.1786	4.3943	73.7895	2040.02	4.6625	6.225	389.554	278.407	830.176	36.8749	64.6357	694.448
Erysipelotrichaceae_bacterium_3_1_53	98.615	74.0386	145.825	14.806	188.725	74.5252	189.329	272.926	110.535	160.911	210.915	56.7458	15.2767	81.8861	129.923	107.595	79.3304	123.528	97.908	144.391	368.138	180.99	108.731	150.176	346.019	53.7911	56.9825	403.799	124.785	227.105	178.954	190.256	19.3436	55.4623	152.569	257.052	85.1319	193.952	70.1691	541.45	62.2253	47.1601	310.949	163.669	204.528	181.771	56.4582	321.865	141.179
Clostridium_sp._CAG:302	33.7282	14.5465	27.7941	41.7749	46.7166	33.4462	42.6058	52.337	32.0586	39.872	60.7758	11.8969	16.9421	10.7199	41.9365	35.2684	135.058	66.9047	30.8302	30.3332	58.2497	34.868	53.695	41.0241	40.8554	39.258	39.7709	116.364	7.4369	38.6282	901.554	35.7165	4.4164	27.1896	14.4385	53.4811	3.9662	109.06	12.102	54.6492	25.2958	27.9465	85.205	48.78	31.859	34.8895	25.1286	211.198	47.4589
Streptococcus_sp._CCH5-D3	10.9882	4.8112	7.436	0.4476	0.1527	1.3186	2.3917	1.9459	5.3047	3.8014	48.8934	85.3704	0.4413	0.4996	3.5523	2.8593	69.6446	45.2575	4.1108	266.439	1.7663	11.0482	44.5045	136.73	20.7973	2.8186	14.797	2.5309	21.1704	0.0366	138.89	154.287	0.7902	0.3928	0.6066	42.9246	2.7288	1.3537	16.2177	81.1783	4.1206	1.4081	183.248	22.5925	15.3528	4.5783	160.141	40.2892	35.7651
Oscillospiraceae_unclassified	4.5361	0.6561	90.4006	43.6097	10.2832	3.9435	36.4339	10.8334	22.1967	24.6947	5.821	0.2577	0.4361	0.1072	13.0898	4.1577	0.8753	0.5668	6.5369	10.1163	0.3424	0.422	1.4264	25.7586	0.7497	2.0922	2.0487	178.755	0.0707	0.6982	31.4564	0.6386	0	1.3003	73.2577	8.1987	11.3417	33.5242	0.2329	0.4146	0.1762	18.4306	51.058	2.0587	5.8396	21.5096	26.5237	102.89	1.7863
Eubacterium_sp._AM18-26	0.0569	1.3069	0	0	0	0.054	0	0	0	0	0.1108	0	0	0.0315	0	0	0	0.0589	0	0	0.203	0	0.0895	0.4772	0.1298	0.2417	0.6564	0.0554	0.2807	0	0.0567	0	0	0	0.3844	0	3.7948	0.4963	0.1227	0	0	0.1969	0	0.0703	0	0	1.1758	0	0.0287
Anaerococcus_sp._Marseille-P2143	0.1651	0.0283	0	0	0	0	0.5536	0.0882	0.2207	0.8218	0	0	1.258	0.3553	0	0.4644	11.7375	0.0738	0.6265	0.5329	0.1019	0	0	0	0.651	0.1819	0.2744	0.6943	2.6994	0.4228	0	2.3457	0.4573	1.6531	0.1205	0.8917	2.3798	0	0	1.2859	0.3392	0	0	0.2645	0	0	0	0	0
Bacteroides_sp._AM30-16	3.9446	0	4.8906	0	0.7716	0.3846	6.374	1.6487	4.4905	2.2854	0.0928	0	0	0	5.3836	1.2786	0	0	1.3043	0	0	0.0243	0.1312	14.4595	0	0.3881	0.0733	20.1331	0	0.1129	0.7593	0	0	0	0.2522	4.4863	0	2.7699	1.4213	0.0505	0	14.2245	0	0.0147	0.2371	4.528	0.0894	1.9897	0.0241
Bifidobacterium_sp._N5G01	3.183	0.4621	0	0.2365	0.0327	0.5053	0.0657	0.1882	0.4813	12.3084	0	0	0.1489	0.4207	0.8986	0.0412	38.1172	1.3116	0.6672	0.6939	11.0687	0	1.6162	0.4257	0.6122	1.1637	0.2908	0.0739	6.2495	0.9916	0.0253	0.5401	1.2052	0.5047	0.0214	0.0976	0	0	11.2198	0.7519	0	0.0176	0.1001	1.6927	0	0	0.8783	0	1.3688
Paenibacillus_unclassified	1.0408	0.2284	0	0	0	0.137	0	0	0	0	0	0	0	0	0.3804	0.9905	0	0	0	0	0.0686	0.0245	2.2314	0	0.2558	0	0	0	1.8181	0	0	0	0.0162	0	11.2831	0	2.7956	0	0	0	0.0415	0	0	0.1484	0	0	0.0864	0	0
Actinomyces_mediterranea	1.3913	0.1444	0	0	0	0.6626	0	0.4692	0	0	7.3332	2.638	0	0.142	0.8635	0	0	0.3927	0	0	3.2043	1.3635	4.5279	3.3954	0.5536	0	6.7124	0.9991	0.826	0	0	1.4512	0.4612	0.1025	0.2043	0	2.9265	0.1785	3.2185	1.7509	0.328	0	1.0115	0.6343	0.1222	0.7503	2.3492	0	1.8157
Roseburia_sp._CAG:45	0.3061	0.1401	0.0802	0.0594	0.9598	0.6334	0.8839	0.3995	1.2348	49.7189	8.2478	0.0356	0.4957	0.1834	1.1661	1.9072	0.4266	0	18.7009	2.2224	5.3832	0.5526	0.5854	8.5625	0.5041	0.2901	0.3187	0	0	0.1325	0.9486	0.2209	0.9443	0	0	9.6307	0.1286	26.1975	0	0.096	0	0.1271	1.6073	0.2525	0.2475	180.608	23.9629	17.1262	0.176
Planctomycetes_bacterium_RBG_16_55_9	0.2484	0	0	0	0	0	0.6359	2.4516	0	0	0	0	0	0.2151	0	0.6537	0	0	0	0	0	0	0	0	0	1.2536	0.1038	0	0	0	0	0	0	0	0.5292	0	0	0	0	0	0.2194	0	0	0	0.7582	0	0	0.6964	0.0601
Clostridium_sp._OF09-10	262.04	12.687	72.8565	15.0363	66.807	94.3141	246.534	254.096	122.448	91.6181	145.008	32.9514	9.1437	53.8781	92.7603	134.727	12.0038	71.7155	87.5191	32.9057	65.4146	38.9773	313.319	43.7389	131.224	53.9515	72.3787	108.854	5.1466	174.565	100.387	87.0039	6.0795	48.5754	74.3214	96.092	2.5399	115.114	22.4337	156.289	21.0033	56.9902	107.246	233.651	129.916	53.1788	66.184	93.0402	571.758
Enterobacter_asburiae	22.9049	20.748	0	1.3738	0.1676	0.1554	38.8596	28.8895	0	57.8909	7.4208	67.5279	261.508	234.53	0.618	31.1491	184.363	70.6307	51.367	65.1817	10.6649	104.59	74.7238	14.5674	84.2354	79.9608	116.243	86.7233	297.559	123.702	7.3516	193.561	203.16	309.704	21.7892	169.488	238.691	0.8632	0.3731	49.1232	225.851	0.9835	0.6864	40.9916	34.7987	1.3947	11.9007	6.0836	76.2425
Escherichia_sp._E4208	0.6719	0.4493	0	0	0	0	3.4229	1.2467	0	2.5808	0.2456	2.3215	9.0125	10.0431	0	2.3927	11.0971	2.7393	2.7164	2.3532	0.3599	4.1807	2.3806	0.8457	2.9708	3.2134	5.2352	9.4432	43.9517	6.1243	0.5024	25.757	1.6156	24.4685	0.958	8.4813	27.1779	0	0	5.4783	6.5365	0	0.2483	1.713	1.6313	0	0.3398	0.5355	2.4199
Pluralibacter_gergoviae	2.9218	0.9482	0.5299	0	0	0	6.3212	4.9337	0	14.865	0	6.9368	38.9545	19.4614	0	2.8836	40.9385	8.0125	2.1053	1.2416	1.1394	4.9168	10.3899	5.6693	11.3402	1.9498	5.2402	12.4716	8.5566	7.7537	0.0994	10.7549	6.528	51.6273	1.6132	20.4397	13.3312	0	0	18.7389	58.8044	0.0691	0	4.8777	3.9025	0.1822	0.0896	1.2716	2.52
Lactobacillus_paragasseri	0.078	2.5795	0	0	0	0	0	0	0	0	0	0	0	0	0	0	0	0	0	0	0	0.0621	0	0	0	0	0	0	0	0	0	0	0.041	0	0	0	0	0	0	0	0	0	0	1.8318	0.1211	0	0.0788	0	0
Kineothrix_alysoides	4.6896	0.5335	0	1.0977	1.6685	0	2.0588	1.6918	1.144	0	1.034	1.8939	0.1422	0.5237	0	0.6716	0.304	0	0	6.2228	0.3109	0.7593	0	0	0	2.8716	0.317	2.3477	0.6713	0	0.0795	0	4.6017	0.2156	2.1805	0.1046	0	17.3826	0.672	0	0	0	12.8781	2.2327	1.4653	1.6054	1.3561	3.7247	3.6344
Enterobacter_hormaechei	166.976	51.7889	44.473	14.7048	30.5141	18.3521	320.598	236.423	20.3238	243.987	35.9956	178.122	1593.78	1310.18	2.6672	106.654	651.596	258.807	263.769	132.332	25.8545	245.29	326.597	51.7094	346.375	164.887	302.988	418.726	1363.89	370.334	32.3587	915.565	562.199	1159.56	60.5654	248.082	821.675	8.6027	24.5209	432.406	662.378	18.4941	69.6794	118.08	125.556	48.847	46.2271	94.2681	240.819
Oscillospiraceae_bacterium_VE202-24	44.3652	37.77	97.6797	12.7688	147.444	49.4051	223.332	262.709	36.6942	118.194	89.0432	8.3655	9.127	3.9529	50.1922	65.9994	35.45	164.093	71.5401	38.588	63.1333	65.9552	50.2089	45.4356	52.7797	54.3364	5.1143	68.5655	9.4483	74.2671	73.6767	43.8973	2.1652	43.7804	126.936	69.4839	0.0889	54.6217	38.5363	49.5251	33.6795	46.2315	107.627	50.5369	67.7895	26.7142	7.8769	106.801	74.1094
Grifola_frondosa	0.3507	0.139	0.6212	0.2513	0.9029	0.9999	0.9073	1.3013	2.2404	0.8979	8.2027	17.769	17.5251	4.0765	4.0108	2.6639	3.227	4.7199	4.2004	7.8598	2.2538	1.9692	2.7609	11.77	15.2038	6.2609	7.2856	8.5336	6.9245	5.1969	2.4471	1.2468	0.1183	0.2803	0.8888	1.0117	0.5442	4.081	0.2523	0.3719	0.1516	1.9428	14.5148	2.8174	0.3493	7.6909	2.2068	3.478	1.418
Prevotella_oryzae	0.0392	0	13.4297	0	0	0	0	0	0	0	0	0	0	0	0	0	0	0	0	0	0	0	0	0	0	0	0	0	0	0	0	0	0	0	0	0	0	0.2565	0	0	0	0	0.8109	0	0	0.1074	0	0	0
Porphyromonas_crevioricanis	69.8054	0	111.726	176.317	83.9597	43.4708	45.6797	6.3837	42.666	102.363	2.5795	0.3048	23.5276	0	52.287	39.9037	2.7834	1.0961	28.2011	102.879	0.6615	1.9591	0.1042	34.5496	0	6.0618	1.2806	54.9496	0	0.4374	65.5727	0.3707	0	1.0047	16.5471	10.5624	0.2054	79.6801	0.15	0.1403	0.801	41.3822	33.4251	16.3564	1.6776	74.2199	0.7138	20.3855	16.5208
Streptococcus_sp._449_SSPC	6.1434	2.7035	1.1558	0.0705	0	0.7069	1.387	0.6115	3.2324	0.7706	21.9862	35.9013	0.2452	0.7914	1.963	1.0662	13.8963	22.4329	0.5999	65.595	0.8586	8.7452	21.646	49.7856	15.8838	1.0019	9.2266	0.9832	5.2025	0.164	39.459	79.0935	0.579	0.244	0.1804	26.4894	1.3909	0.6608	14.5989	41.912	2.8594	0.1513	73.473	4.7539	7.1941	3.2215	42.3876	21.2938	20.9376
Rothia_sp._HMSC069C04	0.1241	0	0	0	0	0	0	0	0.3965	0	0	1.5725	0	0	0	0	0.4896	0	0	0	0	0	0	0	0	0	0.2149	0	0	0	0	0.4965	0	0.0372	0	0	0	0	0	0	0	0	2.7525	0.0575	0	0	0	0	0.0941
Prevotella_sp._AM42-24	1.7932	0.0382	21.2656	0.2767	1.1129	0.8758	0.1249	0	66.0661	1.2302	8.2367	9.2273	0	0	0.6254	20.0413	0.2538	0	0	0.3605	0.0689	0	0	0.5155	0	7.476	2.3635	0.1879	0.2527	0	1.019	0	0	0	0.341	0.0928	0	4.4426	0	0	0	0	19.1219	0.0949	0	3.649	0	4.5197	0
Streptococcus_sp._HMSC062B01	0.0246	0	0	0	0	0	0	0	0	0.0945	0.2878	3.5708	0	0	0.1299	0	3.8821	0	0	0	0.2636	0.1131	0.1162	0.3717	0.1123	0	1.3066	0	0.243	0	0.2944	0.525	0.1246	0	0.1248	0.284	0	0	0	0.0783	0.2234	0	1.4551	0.4563	0	0	0	0	0.3732
Rhizopus_delemar	0.247	1.214	3.3045	3.0357	8.3455	6.4665	4.1694	0	0.2104	0.1265	0	0	0.0968	0	0	0	0	0	0	0	0	0	0	0	0	0	0	0	0	0	0	0.2855	0	0	0	0	0.1246	0	0.1156	0	0	0	0	0	0	0.2935	0	0	0
Xanthomonas_campestris	0.0961	0.2284	0.2553	0	0	0	0	1.6043	2.4552	1.2915	0	0	0	0	0	0	0	0	0	0	0	0	0	0	0	0	0	0	0	0	0	0.2562	0	0.1152	0.1218	0.1386	0	0.4193	0.1037	0	0	0	0	0.0891	0	0.2634	0	0	0
Anaerotignum_sp._KCTC_15736	214.686	134.393	671.014	120.791	534.012	384.358	875.741	1221.24	653.369	707.559	632.639	272.998	58.3221	111.442	191.542	402.421	637.708	742.8	351.714	341.656	632.876	127.501	580.49	417.079	704.887	403.54	164.155	377.421	364.249	213.826	506.653	761.723	57.8445	116.618	516.319	725.261	107.716	755.249	469.462	321.873	122.434	174.865	1446.5	456.181	601.201	424.183	589.159	546.814	332.322
Citrobacter_unclassified	90.536	82.5479	2.8197	8.9243	3.4533	1.5203	78.9763	49.4148	0.2943	666.135	37.5687	259.806	985.293	941.138	9.8624	132.543	1957.52	372.376	209.735	241.279	37.5443	399.438	306.69	52.4147	318.167	283.282	442.875	267.641	1095.01	585.104	25.6661	651.656	716.103	710.734	123.401	754.823	1408.54	7.1561	1.2691	1143.65	1225.95	3.2293	1.6163	293.319	341.563	9.5755	40.0388	33.0901	310.909
Bifidobacterium_adolescentis_CAG:119	23.7925	0.5171	87.9754	4.2288	6.4884	6.2444	4.2419	13.723	5.1218	26.8669	0.6781	526.808	0.1456	3.6922	0.8757	4.1423	102.077	775.035	6.1431	29.5988	173.208	0.183	21.8975	10.8506	33.0802	279.454	0.1166	0.073	12.7438	289.048	0.5932	1.9763	7.1156	3.4476	0.2195	30.3427	0.2816	0.2588	1879.47	58.7478	0.0143	0.5889	19.6536	4.2505	77.594	3.948	42.744	4.8858	462.554
Citrobacter_youngae	12.4902	12.5233	0	0.7269	0.1714	0.1316	11.913	12.3351	0	99.4367	5.6845	37.1075	136.319	135.897	0.3947	23.051	297.298	50.3512	28.6677	32.8275	5.902	56.7406	51.7191	9.455	46.3444	46.6192	77.5208	65.7609	241.446	81.2643	4.9601	154.053	124.932	97.6249	18.3574	123.789	183.917	0.576	0.2824	196.189	151.163	0.3457	0.1646	29.6689	40.5932	0.5166	2.4395	11.1208	50.8086
Clostridia_bacterium_UC5.1-1E11	39.5394	8.1425	57.6571	5.6926	61.6749	3.1335	43.2359	29.4162	14.8603	47.9645	33.4283	29.0474	3.7873	6.3974	8.5671	27.8505	18.7901	13.0902	39.6178	51.6204	24.5558	25.9106	5.8377	11.5855	10.4869	50.5223	8.4006	5.1754	19.467	34.0065	29.0276	3.3035	0.1011	5.2987	26.0319	31.5281	4.1748	114.485	19.9929	20.4938	5.7032	11.3031	29.9532	43.5958	68.7388	12.3395	62.9285	65.104	63.5703
Prevotella_marseillensis	27.974	0.0128	149.895	156.152	16.1646	17.5297	30.3117	3.0253	662.923	54.5559	17.8073	11.3048	20.9479	0.0078	3.9425	10.1237	0.0092	0.0073	3.9708	36.9703	0.2473	0.1686	0	22.3512	0.2634	41.5527	0	18.5875	0.104	0	16.8771	0	0	0	33.8643	4.6388	0	32.6413	1.2208	0.4974	0.1467	51.2802	24.9949	7.1309	1.7438	85.0712	0.6102	12.5213	14.9302
Pseudomonas_sp._OV144	1.4262	0.0502	0	0	0	0	0	0.2438	0	0	0	0	0	0	0	0	0	0	0	0	0	0	0.0905	0	0	0.1078	0	0	0	0	0	0	0	0	0	0	0	0	0	0	0.0497	0	0	0	0	0.2317	0	0.1396	0.3606
Cedecea_sp._NFIX57	0.5501	2.9425	0	0	0	0	3.2024	3.0618	0	6.3381	1.6084	5.3845	30.1181	20.0972	0	2.6863	10.3047	6.8343	5.271	5.1371	0.5892	9.0564	7.1458	1.3847	3.4518	12.2762	7.6189	5.2206	2.7155	9.7824	0.4113	6.2339	12.2509	19.7833	3.4857	0.7935	9.9238	0	0	0	17.4797	0.2857	0	2.2947	3.2873	0	0.3709	0	9.1752
Alistipes_putredinis_CAG:67	9.7891	0	216.063	81.0639	1.1151	10.9017	207.388	73.357	21.8593	232.058	3.8059	0.0851	101.071	0.2231	449.07	98.5285	13.5914	4.4019	120.425	398.703	0.9997	0.2122	0.2147	0.7446	0.597	0.3599	18.4987	91.1439	0.4945	0.6215	424.055	0.512	0	0.018	99.2562	32.081	0.2075	278.029	0.084	0.5229	0.8478	1.8826	9.4274	0.3634	21.715	927.547	9.8567	14.6569	0.0759
Parabacteroides_merdae_CAG:48	3.1852	0	82.3125	3.9283	280.028	13.6298	207.698	28.11	279.934	34.7472	4.6202	5.8453	30.4246	0.2345	7.0452	88.8282	4.986	0.0775	10.9904	39.969	0.1326	0.965	0	83.2491	0.0214	12.2709	4.1144	306.886	0.3219	0.5113	202.313	0.4349	0.0802	0.4443	1.1409	6.2035	0	655.515	2.4314	2.3486	0.2564	89.2932	69.3375	4.9941	6.4863	159.502	0.8474	102.937	5.8019
Parabacteroides_sp._AF27-14	31.6855	0.2919	48.062	123.837	52.1079	95.1885	21.5173	4.7885	50.2477	84.9875	6.0822	3.9562	8.661	0	39.9229	29.6579	20.518	2.2667	15.9387	70.5361	0.3705	1.8772	2.5414	58.7106	0.3369	20.3284	9.7528	131.216	1.3956	2.0856	31.0911	3.1087	0	0.7056	46.1553	21.1024	0	371.396	2.2612	2.9272	65.2602	59.1766	11.3135	6.6943	8.9656	163.233	3.1594	29.3412	15.1005
Bacteroides_ovatus	1810.81	51.2959	7422.91	15785.2	8011.74	8256.77	4969.07	1030.91	13701.4	5905.81	574.424	644.444	3334.77	481.164	12878.1	3398.58	546.384	343.592	3533.34	29035.1	181.571	459.379	327.753	3072.55	297.938	4689.62	555.352	5909.79	2316.73	314.321	4387.46	2707.44	457.512	620.489	8449.16	2023.57	1498.65	4491.2	230.116	516.378	580.133	7209.72	2189.56	22499.1	943.519	29107	470.297	7545.13	1366.84
Ruthenibacterium_lactatiformans	279.113	95.8348	1283.39	557.248	1041.17	682.824	934.571	912.691	2316.9	742.696	1777.97	144.927	160.577	101.894	1161.65	357.076	881.502	348.593	452.913	1359.51	301.884	87.6013	265.91	1267.44	113.682	397.762	139.262	696.399	152.509	135.748	781.635	180.671	26.574	44.7402	913.838	836.614	39.9039	1415.99	179.657	354.082	95.8537	885.954	2504.61	1078.68	964.392	1012.96	1561.09	1584.5	154.313
Clostridiaceae_bacterium_AF31-3BH	138.566	59.0264	234.915	57.0995	240.589	219.316	367.355	537.032	167.535	410.887	259.047	103.154	42.6638	65.8839	170.466	124.222	68.4621	343.078	170.719	162.974	235.368	121.43	363.883	149.691	283.074	315.855	250.438	307.774	122.616	221.235	198.767	319.897	30.2601	90.6015	128.466	328.093	47.1087	635.384	293.521	424.751	94.2073	77.7876	483.343	303.369	345.142	127.558	184.961	450.083	255.251
Lachnospiraceae_bacterium_3_1_46FAA	55.1409	84.3479	60.4169	20.6272	113.035	53.4373	45.5303	47.5605	19.1458	32.1325	32.8372	44.3903	1.498	13.1482	97.4967	64.908	8.5592	31.509	23.3547	70.4496	39.454	107.318	78.4238	69.5718	58.2552	16.8949	42.3716	24.3615	141.284	33.7992	22.0537	15.6782	12.7097	147.131	357.474	90.0617	195.344	38.9243	72.4868	125.777	138.749	28.9877	73.0502	45.9316	110.113	6.3652	38.0882	45.4872	212.75
Bacteroides_uniformis_CAG:3	3.3828	0.4499	62.496	49.3311	59.1305	15.3843	110.78	21.026	4.5428	184.589	3.6318	4.6583	14.9851	1.6239	73.5925	8.983	8.69	13.8312	94.2397	383.344	1.692	0	4.1406	54.9339	1.4071	4.5424	2.6194	104.793	8.5108	1.2645	53.6669	3.7813	0.3555	1.0492	39.8252	16.379	0.2633	186.213	6.4546	5.9539	5.7893	134.741	13.6452	0.1436	9.82	560.573	15.0547	126.775	1.2308
Serratia_fonticola	5.0496	3.0013	0	0.6032	0	0	10.3437	7.2872	0	17.2396	0.8203	20.9997	49.6887	59.4008	0	8.905	50.8944	23.0913	13.7772	12.5757	4.8082	30.5053	20.2095	4.2372	17.9244	23.6124	58.9323	61.4419	484.713	46.1487	5.4536	250.604	43.8779	54.9877	3.9109	64.7486	262.2	1.2243	0.3027	39.2724	62.0386	0	0	12.7433	6.2869	0	4.5397	1.1924	15.9523
Fusobacterium_sp.	0.4248	0	0	0	0	0	0	0	0.3628	0	0.2272	0.4796	0	0	0	0	0.4479	0	0	0.1061	0	0.2609	0.4882	0	0	0	0.6834	0	0	0	0	0	0	0.329	0	468.845	0	0	0	1.4653	0.0737	26.9643	1.2637	0	0	0	0	0	0
Blautia_sp._TF12-12AT	0.1134	0.6154	0	1.2356	0.1248	0	0	0.2703	0	0.404	0	0	0.1425	0	0	0	0.2874	1.1826	0.0971	0	0.3814	0.4589	11.1069	0.775	4.6928	0.7643	0.2238	0	0.3596	0.8768	2.0333	1.1876	0.041	0.155	0	1.3782	0	1.2694	0	0.7982	0.0945	0	0.2397	1.3508	1.452	0.4446	0.1743	0	0
Prevotella_sp._AM23-5	0.1238	0.01	0.0621	0	0.8983	0	0	0	28.0435	0.6392	73.7564	13.9401	0.185	0	0.62	0.9969	0.2095	0.0261	0.028	0	0.035	0.0257	0	61.8304	0.1808	1.6904	1.5239	0	0.6397	0	0.8869	0.317	0	0	0.6675	0	0.0195	80.5658	0	0.0534	0	0.0706	24.5775	0.255	0	0.368	0	9.0295	0
Mus_musculus_mobilized_endogenous_polytropic_provirus	0.5293	0.3146	1.758	0	0.5111	0	0	2.2097	4.6498	2.033	0	0	0	0	0	0	0	0	0	0	0	0	0	0	0	0	0	0	0	0	3.364	3.1758	0.7368	0.9518	1.5094	1.5271	1.0781	5.1975	1.8565	2.1051	1.3731	0	1.9562	0	0.1977	0.7256	0	0.8437	0
Escherichia_sp._MOD1-EC7003	14.9145	4.014	0.0963	0.8183	0.07	0	1.9694	1.6249	0	12.5774	1.4837	24.5265	68.8589	46.3505	0	7.0737	31.0049	19.2876	11.6057	14.866	1.4743	24.9243	15.5379	2.9197	21.304	23.7122	25.1429	7.7523	20.3201	27.3919	0.3252	30.3377	51.4042	33.2681	5.6264	1.5586	25.7678	0.1582	0	9.4602	59.0137	0.2636	0.2143	5.8264	9.99	0.4968	0.8798	0.8473	14.8482
Bacteroides_sp._AF32-15BH	16.5237	0.0579	25.2669	63.2615	15.4243	20.9793	7.8762	1.4459	28.9248	6.7966	0.3798	0	2.2193	0	10.884	9.5932	0.1281	0.7596	4.1322	1.3342	0.0696	0.2415	0.5752	8.2553	0	5.3307	1.0104	11.3533	0.2603	0.404	2.6705	0.5195	0.0329	0.4671	1.6049	1.6862	0	2.9049	0.2102	0.1033	0.4264	44.1883	2.5919	5.4482	0.2426	12.0613	0.0876	13.3007	38.3373
Streptococcus_sp._HMSC072D03	2.8974	0.4182	0.6664	0	0	0.0384	0.0809	0	0.0757	0	7.6166	24.6847	0.0285	0.2251	1.8125	0.8839	5.1309	5.7057	0.3424	11.095	0.3375	8.7463	13.3118	12.7722	4.4259	0.0229	5.3464	1.2941	0.3824	0.0529	13.2134	34.4429	0.2676	0.0885	0.0528	9.5904	0.0829	0	4.9668	20.0692	0.0829	0.0836	26.4105	3.4953	4.208	0.7825	7.2169	7.6384	4.7865
uncultured_alpha_proteobacterium_EB080_L06A09	2.8432	0.9013	0	0	0	0	0	0	0	1.456	0	9.1683	0.2786	9.7585	0	1.2342	2.2427	2.9438	0.9082	1.4162	0	5.8061	1.7908	0	8.6508	3.8677	4.8133	2.2141	1.8715	3.7081	0	7.5818	4.0297	14.9979	2.4023	0	7.06	0	0	3.0154	0.2459	0	0	0	0	0	2.5561	0	0.8623
Bacillus_anthracis	679.026	900.445	2262.91	437.995	3290.03	1748.16	4171.34	6467.71	1996	2628.8	2811.45	1369.92	128.842	449.987	1113.05	1602.05	1103.92	2864.54	1284.54	1689.18	1762.71	1171.93	2704.53	1797.47	2196.17	1731.57	1846.39	847.894	1271.59	1552.13	1844.18	1792.12	707.902	842.523	2057.59	2664.35	819.059	1869.41	1323.96	2746.01	707.8	642.114	4470.79	1384.23	2715.92	1923.86	1355.24	2291.25	1351.61
Citrobacter_sp._86	34.5589	20.2543	1.6564	3.2808	0.6019	1.0438	36.4719	26.009	1.9481	63.8549	13.2656	122.369	340.703	359.706	0.3	49.7684	243.092	134.332	79.3606	83.1041	12.8575	180.487	142.782	21.6069	116.123	124.112	218.902	139.958	810.864	224.899	12.9486	381.019	305.029	340.106	32.1716	109.111	489.486	0	1.0092	77.703	334.713	0.6476	0.4147	74.0316	47.1136	2.8847	13.4214	14.9832	138.413
Dialister_sp._CAG:486	31.933	261.363	116.54	7.2964	81.9222	4.5869	102.168	174.898	146.671	57.7661	349.233	17.7451	0.7013	14.6209	0.5037	10.6498	4.0594	3.2093	28.0745	8.1928	75.9008	13.76	36.5392	52.1393	5.1781	6.8222	8.04	14.1719	7.235	0.2545	10.0997	27.5157	13.3563	3.8161	4.9166	437.907	8.0105	9.0959	2.1818	6.4655	1.1139	5.4516	159.383	34.4406	42.6745	416.2	5.203	38.4869	1.5283
Clostridium_sp._AF12-28	73.6455	4.4797	22.9261	6.2467	17.7905	13.8702	98.1881	73.6808	34.7089	38.8013	48.0326	9.3342	3.2197	1.6321	35.3993	35.8109	7.9703	4.4798	37.8112	30.0994	10.6544	55.6138	87.3336	15.613	43.0886	3.4267	1.0722	13.3192	1.9392	39.2394	19.3361	6.2667	3.7162	14.7141	1.6814	11.5964	0.5288	48.6063	85.9969	23.1827	1.3291	13.9321	15.5656	92.7115	37.0812	15.644	7.419	39.9055	222.672
Ruminococcus_sp._AM44-9AT	10.2108	7.3969	6.6272	5.3909	10.7627	7.9915	22.0816	15.3354	3.8096	22.4994	11.9728	4.6504	2.1116	0.7302	111.76	11.1391	34.5836	9.6786	22.0469	14.5198	12.7363	8.3588	24.2525	80.1104	15.221	10.0862	4.225	13.476	13.833	17.434	23.0375	10.8165	19.4426	4.214	21.5813	44.7363	0.1424	66.4641	102.266	23.8933	12.842	5.5729	45.4651	8.0004	18.2216	2.0106	89.852	75.1223	22.5985
Citrobacter_sp._MGH105	0.1742	0.1774	0	0	0	0	0.9107	0	0	10.9976	0.3536	0.5891	1.0552	1.6169	0	1.4693	37.8071	1.8542	0.2299	0.3316	0.038	0.8165	2.2487	0.1788	0.6077	0.3084	2.7416	5.0781	45.1352	3.0457	0.7233	13.315	1.0284	0.6685	0.6032	12.6151	17.5014	0	0.0383	4.6946	3.0603	0	0	3.025	1.2418	0	0	0	0.5442
Butyrivibrio_sp._AC2005	0.1275	0	0	0	0	0	0	0	0	0	0	0	0	0.0706	0.1122	0	0	0	4.684	0	0	0	0	0	0	0	0	0	0	0	0	0.1133	0	0	0.1077	0	0	0	0	0	0	0	0	0	0	0	0	0.1807	0
Citrobacter_sp._KTE30	0.2074	0.436	0.1702	0	0	0	0.2781	0.1188	0	1.1041	0.3746	1.0291	3.9889	5.0537	0	0.6491	4.0266	1.8616	0.8805	1.3102	0.0686	1.8848	1.4137	0.2802	1.2197	0.8148	1.2902	0.3028	1.0276	2.5818	0.2144	1.0228	3.2528	2.6043	0.6069	0.9195	1.8975	0.0699	0	9.9294	4.3377	0	0	1.6851	0.622	0	0	0.4764	0.9573
Citrobacter_europaeus	3.6331	5.5165	0	0.9739	0	0	7.4432	3.5677	0	41.1265	3.1467	20.468	53.7324	67.204	0	9.98	154.254	29.8695	10.7305	17.242	2.3649	23.7458	20.8513	3.6071	19.18	16.8987	34.7208	14.0085	42.49	36.4076	0.2808	25.9254	61.5322	40.0808	8.2224	41.6085	40.1195	0.4637	0	66.393	72.6287	0.3938	0	19.068	13.8062	0	1.0614	1.3151	18.3298
Negativibacillus_massiliensis	56.916	3.9491	350.85	105.933	155.336	167.428	87.3175	24.1113	216.094	203.988	23.4903	32.89	39.1372	0.8393	204.052	35.0532	22.055	6.4778	81.3162	315.21	4.9795	18.9994	1.8085	76.8887	1.8872	116.82	18.367	151.976	4.2229	2.8387	228.093	5.2191	0.4128	4.4024	100.418	61.1724	0.3815	241.242	6.7801	18.8041	2.8232	365.292	108.597	17.5321	31.1845	454.02	28.1349	175.47	27.6176
Bacteroides_sp._CAG:98	93.9118	0.3281	459.346	378.544	156.724	175.882	102.616	16.0063	325.898	84.2954	20.9045	1.8189	26.3573	0.3154	129.192	50.1508	1.3327	7.9734	156.91	196.133	2.74	6.9985	2.8112	63.2279	0.1685	81.6309	6.5186	118.365	0.6079	1.9799	97.7971	7.4573	0	5.7862	23.7939	18.4766	0	61.3418	6.3114	10.9611	5.1543	312.678	21.9728	50.0505	11.5366	188.505	19.1167	121.53	84.5955
Haemophilus_parainfluenzae	10.326	4.9126	0.7362	0.696	26.1421	1.6494	1.8687	1.2257	3.9921	103.401	6.559	12.0056	0.3682	0.2929	12.2595	21.3674	7.6821	35.1798	12.0757	8.3679	3.1883	29.9703	16.2752	25.418	26.1229	6.1037	6.6124	35.98	4.045	1.0078	8.1756	1922.69	9.2475	20.3988	26.7492	14.9406	65.1953	10.4863	171.433	5.5536	4.054	7.0311	88.7444	6.7274	22.3522	2.9178	4.8882	36.9991	15.9209
Anaerotruncus_sp._22A2-44	22.0035	2.7256	26.0384	16.1594	32.8972	4.1928	63.2063	88.2387	12.0652	32.8147	59.105	7.4555	5.5192	7.7358	55.6133	9.6378	23.9956	41.8166	18.0039	68.5044	27.9116	60.1842	40.181	14.104	86.9703	39.0554	6.022	25.5741	1.7991	9.6344	114.184	10.262	0.1869	2.511	6.1558	13.6694	6.2431	140.088	27.1044	47.5718	10.2642	6.3936	256.285	147.135	57.3683	38.7016	5.001	65.7785	29.5948
Bacteroides_sp._AM16-15	26.46	0.4386	141.845	34.3858	22.755	31.9365	47.8309	5.9089	168.096	32.0155	0.4615	0.6549	6.6231	0	19.2821	7.9537	0.3002	2.5336	53.2185	74.432	0.5488	1.5167	1.5826	7.5746	3.6045	12.5567	0.8448	61.2816	0.3467	0.2131	46.7535	0.9898	0.4477	0.7867	1.809	0.5677	0.3515	7.2651	1.2316	0.8156	1.0156	26.186	33.0622	6.7731	2.032	17.6626	3.7093	13.6247	11.6048
Anaeromassilibacillus_sp._An172	23.181	1.3196	0.3777	2.1279	5.8512	0.4602	13.5041	7.3629	2.0759	0.3945	9.6822	11.1061	1.5945	74.6584	0.1549	6.3763	1.0925	0.0911	0.4921	3.88	7.8827	4.6581	0.7396	1.501	2.2718	20.8625	1.1518	0.2416	6.2833	0.489	0.351	1.0563	5.428	4.594	18.609	7.4959	5.5049	2.01	1.8836	2.7665	4.1491	4.2067	0.5206	11.7378	26.6533	0.2572	13.7117	20.1434	28.9366
Streptococcus_pharyngis	0.2041	0.0434	0	0	0	0	0	0	0	0	1.0681	1.8509	0	0.2427	0.1928	0	1.1525	1.475	0	1.9104	0.4695	0.9511	2.6746	1.4713	0.4168	0	0.5059	0.2133	0.7213	0	2.2942	2.9222	0.2219	0	0	1.0539	0	0	0.3942	4.9228	0.2843	0	4.5359	0.3386	0.2183	0.2003	48.7661	1.7079	1.274
Veillonellaceae_bacterium_DNF00751	0.2415	0	0	0	0	0	0.0815	0	0.1342	0.1931	0	0.3589	0	0	0	0.1025	1.7315	0.0781	0	0.3447	0.6049	0.6039	0.0496	10.8596	0	0.1071	0.9658	0	0	0	0.3793	0.112	0.2003	0	0.1064	0	0.4592	0	0	0.2004	0.0652	0	0	0.6408	0	0.1151	0.2049	0.1269	0.0453
Prevotella_copri_CAG:164	1.1635	0	26.7932	5.8375	55.796	3.594	0.2509	0	903.164	12.6616	5.6701	84.4158	3.563	0	0	14.0999	0.8923	0	4.6456	7.8477	0	0	0	20.6653	0	68.1728	0.7461	0	0	0	30.9312	0	0	0	8.6018	2.3311	0	14.81	0	0	0.3354	357.754	64.4042	0	0.1931	9.2149	1.2203	9.2043	0
Citrobacter_sp._CF-BD	0.0568	0.4388	0	0	0	0	0	0	0	10.0332	0.3321	0.7194	2.7129	3.2065	0	0.4622	23.1807	1.1465	0.4762	1.0607	0	0.7828	1.4754	0	0.5831	0.3621	1.9664	0.2488	4.3453	3.7872	0.0849	0.7572	2.2421	1.702	0.5758	11.4686	1.5203	0	0	1.0841	2.357	0	0	1.2635	0.9333	0	0.1532	0	0.4306
Flavonifractor_sp._An10	23.941	0.1987	2.5753	6.3542	8.3186	0.1896	5.4125	2.9008	0.4924	3.7757	3.4929	1.4012	1.0383	0.7259	3.4394	0.7046	1.1234	5.9193	2.1696	1.3025	3.1121	0.7548	0	1.2692	0	3.5205	0.2065	2.1036	2.2578	0.1273	2.7171	0	0	5.4752	2.4986	0.4447	0	3.6414	0.6374	0	0.2033	13.2321	1.6301	2.2003	8.2839	13.5881	2.3233	28.9623	2.7801
Pantoea_ananatis	97.483	87.5391	1.0353	9.2156	0.7524	0.5555	170.126	136.635	2.4893	339.996	25.0638	225.702	776.887	859.756	2.571	127.293	853.769	278.959	210.952	271.739	42.9899	431.974	289.431	61.7925	280.069	281.241	616.127	1053.81	6244.9	550.596	86.8142	3979.33	886.314	1210.36	76.5396	1221.11	4042.11	3.4008	1.6819	663.837	880.346	4.4522	4.6079	199.338	147.859	8.5455	88.7971	25.6707	313.413
Bacillus_subterraneus	0.1275	0	0	0	0	0	0.2475	0	0	0	0.3728	0	0	0.3177	0	0	0	0	0	0	0	0.2929	0	0	0	0.6505	0	0.3724	0	0	0	0	0	0	0.1616	0	0	0	0.1376	0	0	0	0	0.1182	0.5715	0	0	0.813	0.7734
Serpula_lacrymans	0.1461	0.6079	2.7176	0	0	0	0	0	0	0	0	0	0	0	0	0	0	0	0	0	0	0	0	0	0	0	0	0	0	0	0	0	0.037	0	0	0	0.085	0	0	0	0	0	0	0	0	0	0	0	0
Pelotomaculum_sp._PtaU1.Bin065	9.2266	0	0	0	1.8912	0	0	0	0	0	0	0	0	0	0	0	0	0	1.16	0	0	0	0	0	0	0	0	0	0	0	0	0	0	0	0	0	0	0	0	0	0	0.0955	0	0	0	0	0	0	0
Bacteroides_faecichinchillae	28.0246	0.0436	128.248	58.7144	52.3178	50.1346	50.5206	13.7362	30.6107	88.1981	6.3798	0.2288	13.1336	0.4047	92.6689	15.1023	0.8631	0.9548	41.7598	80.1555	0.3434	1.0967	0.6824	18.2113	0.6297	9.252	6.9103	49.6115	0	0.7686	32.0039	2.4594	0	0.7315	34.6539	5.146	0	44.7606	2.5387	6.3092	1.4158	130.046	3.7733	26.2023	4.8816	115.454	12.0913	78.483	14.4228
Streptococcus_sp._ChDC_B353	1.885	0.9188	0	0.1051	1.4122	1.1672	0.1439	0.5548	0.5121	1.4121	0.3788	62.3768	0	0.3395	1.6688	1.7162	46.4435	4.2418	0.0512	0.9865	3.6811	2.6981	35.1883	8.6589	2.2089	0	16.4504	1.562	14.4769	0	2.9863	5.7284	0.4491	1.3011	0.9261	9.4584	1.4368	1.8307	2.9369	20.6935	1.7535	0.2729	6.669	3.3613	30.878	0.1225	11.984	5.1904	16.6342
Bacteroides_unclassified	115221	261.835	96179.2	281858	92816.2	112390	57001	9888.97	97546	59043.7	6801.77	965.389	24243.9	431.288	172250	46426.1	1311.5	2515.61	67322.9	122944	1629.07	1320.22	2768.35	44944.9	924.712	22835	7449.42	78819.8	1194.84	995.821	92010.2	7767.2	515.013	3465.5	62756.7	12211.2	818.639	38666.3	2736.28	2626.49	2761.33	168733	11169	59234.6	7028.67	179956	1942.69	108719	57747.8
Bacteroides_sp._4_3_47FAA	1441.33	5.3715	1757.46	4450.11	2192.33	1851.77	1224.04	164.63	1467.74	1079.71	105.006	3.9958	202.699	4.1103	1096.86	691.5	9.7417	21.4887	354.287	288.863	9.3669	20.5664	30.6633	666.523	7.762	399.061	61.745	1202.01	8.0596	26.3073	312.62	41.0262	0.1543	56.9406	93.0396	160.686	3.7866	290.18	25.6266	28.9092	37.5469	5630.38	152.922	557.768	102.288	996.292	42.9687	1119.15	1052.23
uncultured_nuHF1_cluster_bacterium_HF0770_35I22	10.6173	7.0633	12.4234	15.2896	5.2668	19.7194	11.7198	7.9523	21.7813	54.6219	104.242	23.7817	6.443	6.7942	8.9986	9.5139	33.4225	18.1535	10.2675	16.7384	25.2513	9.1003	20.4764	14.7125	78.2416	22.1117	32.1555	413.311	43.7588	27.5437	34.3761	33.2477	8.3819	13.5461	16.7893	13.7703	13.6052	224.88	4.6253	14.2561	10.2336	5.2616	275.897	23.2977	58.2121	14.9546	58.8478	19.046	5.022
Epulopiscium_sp._Nuni2H_MBin001	56.9969	0	2.169	1.3959	2.8212	0	19.7248	39.2181	5.294	1.618	15.38	31.1609	0.318	0.0656	0	0	0	22.6139	1.9462	0.2158	105.501	2.7973	43.9982	0.1639	7.0413	2.6335	47.9558	10.6753	2.731	3.1247	0	3.8867	0	10.1287	0.3914	8.6478	0	1.5215	0	6.5979	0	1.8979	13.4402	92.1466	17.3755	2.2397	0.984	4.412	0.1759
Aminipila_sp._JN-39	0.6051	0	0.686	0.327	0.6607	0	1.5491	0.7758	0	0	1.2226	0.2627	0.2103	0.4419	0	0.7425	0	0	0	2.411	0.6922	0.0873	0	0	0	0.9696	0.0878	0.111	0.3753	0	0	0	0	0.0228	2.1679	0.1096	0	1.1267	1.0409	0.1369	0.493	0.2369	2.2354	0	1.8742	2.5951	0.5639	3.6604	2.6227
Lachnospiraceae_bacterium_NK4A144	25.605	0	0	0	1.1777	0	1.1835	0	0	0	13.6086	7.7257	0	0	0	4.4674	0	1.8943	0	0.6895	5.8796	1.6345	9.3629	0.7676	0.3479	0	0.7039	2.2262	0	1.6269	0	0	0	6.2145	0	2.1993	0	0	0	8.2464	0	0	5.4093	0	1.3667	0	0	1.2961	0
Bacteroides_sp._An322	1.3242	0	1.8244	2.4255	1.3259	1.8179	0.3807	0	0.6267	2.0721	0	0	0.0721	0	2.3301	0.7984	0	0	1.9974	0.7328	0	0	0	0	0	0.5004	0.2264	1.8619	0	0	0.7334	0.2616	0	0.1176	0	0	0	0.6421	0.1059	0	0.2544	4.4833	0	1.0003	0.1465	5.3783	0	2.9186	0.8924
Citrobacter_braakii	6.1237	5.6721	0	0.5347	0	0	5.1714	5.6927	0.2435	76.7069	2.9833	19.5117	63.3386	68.4825	0.2181	15.7561	189.78	29.1699	12.5766	17.4464	3.8187	33.2143	24.5448	4.0894	21.5794	21.0731	27.7105	12.5339	48.4316	42.2908	1.1754	24.3193	55.6632	48.4083	8.9547	61.4638	58.1272	0.153	0.1695	83.4564	106.478	0.33	0.4508	22.5755	34.9463	0.627	2.0585	1.169	26.3294
Ruminococcus_sp._AF24-16	0.5101	0.5305	0	0.8226	0	0.7272	1.2373	1.4196	0	1.2244	1.8642	1.7622	0.4686	0.7412	3.0291	1.453	0.5029	0.5941	0.9164	0.2382	3.6881	1.2694	1.2047	1.284	1.0184	0.1626	2.7965	1.8619	0.9442	1.7008	0.9534	1.1901	0	11.0831	0.3232	6.622	0	1.113	3.9908	1.42	0.7443	0.9272	0.377	1.5368	0	0	3.4392	0.813	0.6768
Clostridium_sp._AF28-12	1375.13	26.9408	255.792	84.9466	383.458	294.949	1517.9	1704.41	657.706	249.342	2795.63	152.436	16.1572	27.5136	342.011	708.933	34.275	932.582	300.467	54.3597	158.359	225.497	1975.06	138.618	1048.93	335.182	178.606	208.602	80.382	368.994	198.942	296.75	49.6859	393.42	219.492	85.1615	4.2671	191.91	68.8632	141.894	32.94	98.7599	594.711	1809.36	314.192	84.0068	25.4852	278.217	752.244
Fusobacterium_mortiferum	83.8358	5.257	16.1998	15.9867	825.528	24.6087	27.6548	48.0812	47.0098	28.7955	333.139	2534.85	1.9946	12.1398	19.9534	25.6001	15.2853	26.715	25.1119	17.151	20.2875	30.4613	28.7482	8.706	16.1721	34.303	32.8104	15.1597	4.0501	19.2199	17.9548	17.6829	2.3092	10.0774	26.2577	3807.45	15.7918	34.2258	12.2111	413.537	7.7861	18966.4	3558.56	37.0227	33.8503	24.4388	20.5491	27.3123	18.1491
Clostridia_bacterium_UC5.1-1D10	40.9111	187.117	7.8587	5.3023	33.0018	7.0936	48.2399	58.7126	13.9854	23.4771	51.8163	13.9815	1.5871	0.112	194.541	13.9356	2.4939	64.1245	8.6137	15.0768	41.9051	13.2852	28.4507	6.9716	7.0113	9.7903	17.3466	40.8688	39.4124	11.9606	25.3908	21.0774	8.4213	48.9777	67.0047	39.6931	21.1395	22.8731	67.0169	15.3193	30.8258	3.7141	92.7493	28.5268	16.1538	9.4389	17.8243	26.8359	32.0997
Bacillus_sp._OxB-1	0.2614	0	0	0	0	0	0	0.9699	0	0	0	0	0	0	0	0.5673	0	0	0	0.3255	0	0.0667	0	0	0	0.5555	0	0.1272	0	0	0	0	0	0	0.4417	0	0	0	0.094	0	0.113	0.6335	0	0.5654	0.5207	0	0.235	0.3703	1.6514
Bacteroides_sp._CAG:144	0.2885	0	7.0487	2.0249	2.2925	1.423	2.5998	0.3692	1.2394	1.7003	0.1939	0	0.0731	0	1.6936	17.878	0.327	0.0515	0.8898	2.5208	0	0.0254	0	1.6195	0	0.1269	0.1148	6.1829	0	0	4.6364	0	0	0	1.6012	0.1435	0	4.4862	0.204	0.0528	0.1011	3.2793	10.4609	0.4611	0.3963	4.0818	0.0894	1.4588	0.4702
Bacteroides_zoogleoformans	8.0547	0.0947	67.6385	13.8258	9.4421	98.5328	8.9311	3.2406	12.6982	54.0375	4.0633	1.2772	8.6831	0	56.3944	3.6698	0.1299	2.3952	25.3536	81.3781	0.1707	0.2441	0	3.6904	0.1503	8.3972	1.6558	17.2442	0	0.1757	37.3456	0.7393	0	2.5757	8.5954	1.9896	0	25.9308	0.4563	4.4713	1.4292	20.3658	13.7794	5.5423	5.058	49.6069	1	19.7628	3.9677
Candidatus_Portnoybacteria_bacterium_CG06_land_8_20_14_3_00_39_12	1.2878	0	0	0	0	0	0	0	0	0	0	0	0	0	0	0	0.3125	0	0	0	4.1172	0	0	0	0	1.3138	0	0	0	0.458	0	0	0	0	0	0.6859	0	0	0	0	0	0.3293	0	0	0	0	0	0	0
Eubacterium_dolichum_CAG:375	0.5749	0	0	0	0	0	0	0	0	0	0	0	0	0.5728	0	0	0	0	0	0	0	0	0	0	0	0.2932	0	0	0	0	0	0	0	0	3.4971	0	0	0	0	0	0	0	0	0	1.7177	0	0.6202	1.4661	1.9178
Clostridium_amylolyticum	0.1699	0	0	0.1523	0.5431	0	0.1364	0.4595	0	0	0.2071	1.9433	0	0	1.5426	0.1153	0	0	0	0	1.4555	0.7531	0	0	0	0.2696	3.1031	0	1.128	0.4158	0.1748	0	0	0.1264	0.3591	0.3058	0.2721	0	0.2523	0.3719	0.1371	0.0736	0	1.1839	0.6326	0	0.2377	0.2241	0.9628
Bacteroides_sp._AM26-11	21.7372	0	40.1594	61.3073	28.8295	13.0944	47.6043	13.8227	15.7144	77.8587	6.9331	0	12.9848	0	53.8482	6.7264	20.585	0	34.6842	58.9719	0.4257	4.5402	0.7008	4.3015	0	6.0656	3.2117	37.4573	0.2421	0.216	36.14	0.5759	0	0.7649	8.5801	1.7402	0.2283	107.991	1.3915	0.3121	0.5952	26.4012	2.0823	13.5591	2.8565	387.575	0.2899	77.9837	14.7391
Clostridium_sp._CAG:7	3025.24	26.3832	215.453	409.173	674.239	907.749	426.079	754.204	178.22	94.4513	979.999	4113.77	9.1348	153.165	284.695	679.721	11.4876	867.116	135.528	34.2513	1681.58	412.212	1160.35	61.4164	562.531	363.706	6029.77	410.497	1842.2	4264.94	30.0366	457.965	13.0081	3325	44.842	299.978	4.5006	184.868	30.5295	716.499	128.191	136.053	2278.33	3465.55	1210.38	41.263	7.4108	170.332	19.3724
Citrobacter_koseri	77.8597	47.7542	0.7937	4.2899	2.6748	0.372	78.7251	47.7346	1.0216	209.848	24.1952	218.592	681.725	678.317	1.6299	92.9936	701.671	225.672	172.498	193.235	27.9804	303.531	202.37	60.8202	218.772	225.591	362.388	366.128	1684.69	385.735	28.0435	1080.11	577.49	619.778	66.091	324.881	2103.47	3.4042	1.3286	286.725	608.872	2.4593	4.2988	152.899	92.1909	3.7572	29.1395	20.0588	231.259
Shigella_sp._SF-2015	75.7403	78.7333	2.3805	7.4471	0.2339	0.2893	57.1283	46.2669	0.8892	175.639	42.3214	173.605	1080.9	1035.48	1.3276	101.525	480.212	370.497	219.851	192.795	25.247	418.825	303.411	72.6106	337.684	311.028	458.622	138.469	260.329	531.246	13.7381	217.863	758.207	714.811	82.2297	19.8013	444.681	2.3196	1.2539	34.622	815.779	3.0093	2.0992	174.317	123.906	6.405	13.9447	28.9696	325.029
Sphingobacterium_sp._JUb20	6.1817	4.7318	0.0966	0.9844	2.5252	1.3952	11.6901	11.4662	1.3025	18.5467	5.3477	10.0882	62.785	61.7869	2.1408	8.8254	51.2036	26.769	15.5116	13.217	3.5595	22.1731	24.2537	5.4883	22.3628	16.2005	41.13	61.8933	336.229	34.897	6.6002	198.308	41.3729	69.0503	7.221	65.7408	222.769	3.3203	0.4601	38.1672	54.4416	0.7541	1.7952	13.8266	11.303	0.0996	5.2417	2.346	19.4663
bacterium_LF-3	2.7406	9.6359	1.6768	1.6193	12.5582	0.4123	2.6023	3.2688	11.7541	18.9237	9.351	1.9303	2.9538	0.4395	18.4549	41.2979	5.5526	8.6507	34.7211	3.0869	5.453	2.7549	7.6788	39.6444	17.4546	20.1424	8.13	4.2972	6.856	7.7163	6.8226	2.5126	2.0963	5.9391	1.4085	38.6044	3.0844	36.6465	4.0727	3.9594	1.5788	1.1792	14.59	5.3465	39.365	36.0989	64.3207	43.1394	5.8151
Lachnoclostridium_sp._An118	9.4556	0.3443	4.3341	2.2483	5.2667	1.9106	2.24	3.9059	3.2893	4.4992	5.5238	9.9207	0.0634	0.11	1.0612	5.656	0.3257	13.4856	2.0789	150.747	13.1279	0.7792	11.9738	2.3883	22.9568	0.7821	2.2866	22.549	0.9286	3.0124	1.6029	1.1204	0	6.1786	7.2448	4.7497	6.997	3.3501	1.0314	6.3136	2.8734	0.9727	12.2927	0.6626	8.5793	1.2651	1.4597	17.2901	0.2109
Enterobacter_cancerogenus	1.3787	1.4837	0	0	0	0	35.9616	16.8979	0	14.7627	0	3.4404	8.3467	13.8191	0	7.5034	42.7023	2.4907	3.0601	3.0183	1.8717	3.896	9.3945	0	3.6173	4.3635	12.7007	35.3265	204.737	15.7697	4.7513	125.359	5.1241	94.6071	1.1147	65.8583	108.275	0	0	16.9072	12.221	0.4939	0	2.04	1.1058	0	1.5337	0.1253	0.8282
Papillibacter_cinnamivorans	4.5354	0	0	0.829	2.0058	0	0.6855	2.1348	1.0973	0.6597	1.0472	1.2856	0.3545	0.1983	0	0.583	0	0	0	0.223	1.1025	0.5559	0	0	0	1.8537	0	0	0.5614	0	0	0	0	0.2698	1.567	0.0861	0	0	0.1288	0	0.0774	0	0	1.4416	2.4632	0	0.7178	0.6343	1.8102
Tindallia_magadiensis	1.9796	0	0	0.2165	0.5184	0	0.521	0.1245	0.4288	0	0	0	0	0	0	0	0	0	0	0	0	0	0	0	0	0	0.1951	0	0	0	0	0	0	0.1013	0.6615	0	0	0	0	0	0	0	0	0	0	0	0	0	0.2035
Escherichia_sp._20412-1	2.2644	11.7254	0	0.2338	0.21	0	7.3887	5.0085	0	21.3188	6.2325	9.8448	115.894	123.169	0.3918	16.0778	54.5475	52.3443	29.2036	23.6203	3.8881	79.0603	43.974	4.071	52.555	54.776	66.3086	12.7364	28.3769	78.3303	1.8557	13.9682	107.877	107.678	13.0085	3.9088	72.9207	0.2373	0	4.6566	130.948	0.3084	0.2194	24.3491	19.2442	0.2035	3.3353	4.1524	39.7468
Lachnospiraceae_bacterium_TF09-5	2.2932	24.414	1.4494	0.4286	0	0	3.0537	2.0309	0.4631	0.6485	0.1991	0	0.1527	0.1131	0	0.1691	0.1537	0.1614	0.4537	0.9218	0.0729	0	0.0428	0	0.0827	0	0.4309	0	0.0641	0	2.8397	0	0	0.0217	0.5053	0	0	1.5871	0	0	0.0883	0	1.7877	1.01	0	0.1424	0.2933	1.2582	0.055
Prevotella_sp._Marseille-P4119	48.415	0	59.8361	0.6283	174.993	15.9153	2.8598	1.4961	2009.38	24.746	213.395	158.486	8.4868	0.1723	0.9682	48.6169	0.6831	1.6483	2.7236	31.8358	1.1492	0.4131	0.1715	29.8072	0.6956	139.935	23.9501	10.746	0.8195	0.1292	64.4138	0.6278	0	0.5319	17.5519	0.3558	0	527.336	0.3368	13.2252	0.4106	359.851	249.829	0.1383	2.5268	36.7154	0.4123	217.156	6.5268
Bacteroides_sp._AM27-13	59.6207	0.1733	154.889	178.067	59.2857	112.362	58.0207	12.6592	48.2468	69.3894	8.3259	0.958	12.4103	0.3937	103.464	44.5844	0.7428	5.0365	11.6643	80.6463	0.5372	0.5725	1.5466	29.7332	0.3675	12.0872	0.9156	28.2598	0.5922	2.0701	14.8912	1.6651	0.24	1.0799	14.1983	8.2678	0	56.6298	0.9805	1.4648	1.6098	224.065	12.975	17.4676	9.4368	184.436	0.2704	28.4935	47.5398
Bacteroides_sp._AF39-10AT	0.6206	0.0407	78.9081	53.2717	64.6117	82.3327	58.9271	9.2185	42.0679	83.251	1.406	0.2222	11.6187	0.1989	47.3876	32.1202	1.369	5.3165	9.1733	58.879	0.3075	2.9493	0.5044	12.3658	0.4376	8.1854	19.299	66.5838	0.1178	0.0608	8.9213	1.4097	0.1019	0.1099	15.9813	1.3147	0.8965	98.6952	0.6468	3.1813	0.7831	11.4022	3.1695	6.9731	9.6387	156.071	0.8923	77.7474	12.7239
Actinomyces_sp._HMSC062G12	1.1653	0.1404	0.1718	0	0	0.9283	0.5924	0.154	0	0	2.0938	5.4991	0	0.1119	0.3702	1.1484	0	1.1394	0	0	9.5085	1.6865	0.2485	2.5554	0.1894	0.3175	10.088	0.2156	4.3331	0	1.4004	0.44	0.6355	0	0.7555	0	1.9032	0.5152	9.7093	15.3175	0.5316	0	0.7362	1.4906	0.8767	0.1923	1.9986	0.6869	4.823
Oribacterium_unclassified	9.2597	0	1.5529	0	0.7465	0.25	0	0	0	0	0	8.4627	0	0.1387	0	0	0	0.2866	0	0.6189	0.7763	0	0	0	0.4001	0	3.1457	0	0.4328	0.0491	0.552	0	0	0	0	0	0.2401	0	0	0	0.456	0	0.9796	0.3251	0	0	0	0.1174	0.2747
Raoultella_planticola	12.5054	8.7011	0	0.377	0	0	17.8732	14.4015	0	35.2887	4.0791	40.7803	104.663	113.219	0	15.4705	90.3387	40.9527	37.6055	28.9759	3.4542	62.5973	37.1806	4.0683	37.3516	40.4541	91.1202	105.403	526.034	67.7657	10.1228	304.512	108.343	126.285	15.9526	82.2205	283.502	1.4306	0.7075	55.3117	110.064	0.3643	0	29.7476	19.7263	0	15.7611	7.1287	41.2678
Leminorella_richardii	0.3174	0	5.4611	0	0.8607	0	0	0	0.957	0	0	0	0	0	0	0	0	0	0	0	0	0	0	0	0	0	0	0	0	0	1.0833	0	1.9651	0	0.526	0	0	0.5144	0	0.3906	0.2356	0	0	0	0	0	0	0	0
Parabacteroides_sp._AM18-12LB	0.9951	0	1.1332	2.0888	6.9547	2.905	0.092	0.0879	0.1514	2.0931	0.4157	0.2729	0.7662	0	0.1251	0.5785	0	0	0.3406	1.5932	0	0	0	0.7157	0	0.7856	0	1.799	0	0	0.9212	0	0	0	0.7207	0.0684	0	5.5838	0	0	0	1.1814	0.2802	0.0439	0.4956	2.2085	0.0639	0.5036	0.2874
Clostridiales_bacterium_Choco116	0.8489	0.0493	36.6494	1.2049	2.0126	0	43.3987	17.4065	15.898	45.8738	88.5149	4.8686	8.9	5.1298	0.9624	3.4794	36.4745	4.0022	16.3845	116.628	1.1805	0.2327	0.9484	42.4588	0.3969	1.5675	1.3067	37.8167	0	0.6858	22.7926	2.3478	0.0858	0.0367	0	18.6935	0	50.3399	1.9957	1.2347	1.295	1.6213	209.867	106.819	47.8477	54.2176	76.0527	80.3898	2.029
Clostridium_sp._chh4-2	84.1126	0	0.9524	0.3169	2.2819	4.7106	11.6996	6.6573	4.2316	0.2974	14.2581	13.4181	0.095	0.0922	4.653	0.4716	0	2.2854	2.9346	0.7244	0	0.5635	0.2832	1.8271	1.3332	6.4632	1.5018	0.1107	6.1524	33.8717	1.5611	1.0283	0.3277	0.7761	47.5612	2.3795	1.5446	4.3837	0.0399	0.7798	0.5854	2.1976	4.5516	3.61	144.18	0.6202	1.0846	12.4696	1.0485
Mannheimia_haemolytica	106.953	97.5436	56.8369	31.2913	16.9292	1.9997	134.06	111.26	21.2834	343.445	28.7094	278.246	1224.69	1193.55	6.479	176.102	1033.79	421.524	265.463	299.982	59.3511	612.523	408.332	79.4475	378.094	340.769	839.461	1220.65	6442.35	655.436	89.1447	4228.48	1327.87	1252.57	97.3288	1159.4	3952.18	9.1822	39.3574	664.395	1228.26	2.1856	17.6251	223.333	201.181	25.9569	85.592	35.028	430.445
Bacteroides_pyogenes	50.1105	0.1598	328.109	290.473	321.106	295.28	154.591	22.8453	245.861	177.467	6.8688	7.7676	41.7493	1.4143	146.541	42.8454	2.5057	7.216	79.5435	276.34	2.0712	4.9446	2.1699	74.3035	2.2655	126.368	13.09	170.071	2.5967	2.9467	100.694	8.0455	0	2.6499	89.7545	16.9634	0.0548	178.241	8.7166	12.3752	1.311	403.382	19.0767	59.6815	26.2412	316.275	23.976	134.929	50.759
Tannerella_forsythia	31.7901	0.1832	417.789	114.84	169.255	178.802	69.9652	7.5218	169.199	136.745	13.896	54.0762	33.2111	0.3129	122.442	30.4837	6.3733	4.7607	56.2562	252.055	1.765	2.5236	0.7938	46.3929	0.7495	61.07	5.2887	80.2102	1.86	1.3836	93.6006	6.0035	0.156	0.826	40.6382	4.7312	0.0868	131.866	5.0592	22.7286	3.6339	196.49	35.8646	22.533	10.8326	146.139	12.2254	125.672	27.4422
Stomatobaculum_longum	16.401	0.3168	6.1226	3.0596	6.1363	4.3109	10.2737	8.2516	33.0239	9.7744	9.6891	91.8698	0.9469	0.1911	2.7647	11.012	1.3664	9.8735	47.8979	0.319	10.7246	14.5816	7.0687	11.1307	9.8339	20.9878	49.0217	18.9507	25.2345	2.5729	5.7008	12.6746	2.8279	9.9885	9.8606	9.7005	15.8071	36.2178	7.1175	50.1746	2.6052	11.9489	37.2102	1.7194	13.4125	4.18	4.3485	113.29	10.2241
Faecalibacterium_sp._CAG:82-related_59_9	1.3271	0	0.138	0	0.1894	0	0.3807	0	0	5.5869	0	0	0.3054	0	0	0	16.1862	0	0.4217	0	0	0	0	0	0	0	0	0	0	0.2772	0.0777	0	0	0	0	0	0	0	0	0	0	0	14.5916	0	0	0.997	0	0.9937	0
Kyrpidia_tusciae	1.1188	0	0	0.0359	0.1935	0	0.2592	0.1239	0.8535	0	0	0	0	0	0	0	0	0	0.08	0	0	0	0.0789	0	0	0	0	0	0	0	0	0	0	0	0.8042	0.1445	0	0	0	0	0	0	0.5924	0	0	0	0.0901	0	0.0253
Streptococcus_sinensis	0.1144	0	0	0	0	0	0	0.347	0	0	0	3.689	0	0	0	0.0462	4.0843	0.0882	0	0	0.4846	0.06	0.1775	2.6571	0	0	3.5382	0	0	0	0.544	0.2494	0	0.1242	0	0.2698	0.1322	0.204	0.429	0	0.4817	0	1.2391	1.2231	0	0	0.0766	0	1.4826
Paenibacillus_amylolyticus	2.1357	2.3673	0	0	0	2.1396	0	0	0	0	0	0	0	0	0.3809	2.2551	0	0	0	0	0.5565	0.1326	5.215	0	0.1646	0	0	0	3.9182	0	0	0.0385	0	0	19.8985	0	6.5843	0	0.0623	0.0918	0.1123	0	0	0.1338	0	0	0.0778	0	0.1532
bacterium_D16-54	5.8383	0	0.369	0.075	0.8086	0	0.4063	0.1295	1.7745	0	0	0	0	0.1159	0	0	0	0	0	0	0	0.2672	3.8735	0	0	0.356	0	0	0.8613	0.1862	0	0.3722	0	0.1673	0	0	0	0	0	0	0	0.145	0.4126	0	0.1043	0	0	0	0
Paenibacillus_sp._UNC496MF	1.5855	0	0	0.4011	0.1441	0	0	0.4153	1.1917	0	0	0	0	0	0	0	0	0	0.0894	0	0	0	0.2643	0	0.0426	0	0	0	0	0	0	0	0	0	0.7565	0.2153	0	0	0	0	0	0	0.6618	0	0	0	0.1006	0	0.1131
Serratia_plymuthica	7.4014	0	0	0	0	0	0	0	0	0.2777	0.5192	22.7317	1.0439	3.6957	0	0.1177	0.7129	1.1641	0	7.9678	0	2.5623	0.2097	0	1.4181	0.4529	0.0835	0.6241	6.1492	2.3389	0.3244	26.0637	0.8987	0.9579	0.5498	0	1.599	0	0	0	3.68	0	0	1.17	0.7562	0	0	0	5.2828
Clostridium_sp._CAG:964	12.5903	0.0395	0	3.8284	2.6068	9.3062	2.7885	2.6145	0.8868	0.5449	3.0901	3.4683	0.7724	0.7622	0.1095	39.3518	0.37	0	0.5724	2.1763	2.6849	1.6114	0.0771	0	0.1913	7.1924	0.1131	0	4.7811	3.2842	0.3699	0	0	0.32	6.0593	4.978	0.1366	56.0758	1.1273	0.5152	0.5927	0.4055	338.549	5.2742	9.678	0	4.1709	6.7631	6.3859
Enterobacteriaceae_unclassified	23200.7	12421.3	595.11	1512.3	597.486	476.69	9678.22	8675.24	447.28	26016.8	6039.81	60918.8	186732	162947	454.597	18121.9	75967.7	56297	35468.4	48468.2	4860.81	74306.4	44280.3	11972.9	50880.3	49834.5	73800.6	32073.5	92511	82576.5	2717.57	82166	156646	115111	14104.4	10038.4	104795	1304.94	821.806	13350.7	150737	539.063	1595.16	29448.6	21368.1	1582.19	3976.04	4846.29	55152.3
Capnocytophaga_sp._oral_taxon_332	65.5506	0	197.097	4.7646	147.98	230.213	14.1111	2.6345	117.928	139.064	28.4326	293.689	19.3528	1.0361	15.2747	33.4446	39.284	5.9472	19.1207	223.096	2.3506	2.4712	0.1016	104.305	0.1473	69.1931	10.2306	14.5752	0.2124	0.4974	161.625	1.0326	0.0653	0.0774	78.9057	13.1583	0	163.177	3.5754	8.1452	2.7904	325.293	345.761	27.682	10.5425	389.029	3.0752	42.0647	53.1089
Clostridium_sp._AF23-8	31.5904	2.6307	401.945	130.183	266.72	185.958	121.188	24.7935	91.4029	117.682	19.5105	0.3523	16.4024	14.068	51.4707	19.1542	5.5981	8.1307	44.0306	116.775	1.4634	24.1403	2.6159	76.7952	12.3203	53.1752	24.6937	113.043	2.4559	11.9111	44.9708	1.8605	2.7042	6.6046	19.8579	52.4484	7.3706	76.6263	11.7013	25.0814	21.7067	284.963	192.143	12.8477	21.5554	132.761	33.5407	64.7613	31.5188
Blautia_sp._aa_0143	6.2798	11.3896	9.902	4.5831	5.7235	7.714	57.7217	53.1022	13.3175	36.2579	11.1071	9.8995	2.8098	2.4594	19.7514	9.7782	14.2885	23.0021	24.4219	14.8733	20.6693	18.7249	10.6644	19.1641	43.8091	6.1372	9.7441	6.9783	20.4892	13.0055	24.0003	4.0186	11.3978	4.8986	16.4812	21.5403	3.2196	25.2185	22.9167	29.5727	7.9573	16.4704	28.0792	19.1896	25.6778	19.4082	11.8995	36.4189	32.948
Flavonifractor_unclassified	8.8156	1.3893	2.0703	3.8575	7.6791	9.8775	18.5073	15.9739	10.1787	21.6496	15.2499	5.9325	1.9364	2.6796	3.9333	6.6689	2.2306	1.736	3.8847	34.8831	2.727	82.8535	1.2928	6.8544	3.7057	3.8171	27.7855	3.7613	2.7041	8.2873	7.9515	2.9321	0	6.0642	7.8979	5.6408	0.8077	5.0613	14.0706	6.5323	1.5608	3.5719	3.3145	4.484	11.8137	1.5979	2.2362	2.1237	6.8509
Acidaminococcus_fermentans	10.5763	28.8583	9.8109	0.9328	1.1085	1.8012	6.2819	8.0246	1.6132	3.562	1.262	0.4971	0.4774	1.2751	1.4342	0.1177	2.1321	8.3374	7.6187	24.6993	12.91	15.825	5.8671	0.717	10.0653	4.5222	0.1669	0.8926	1.2356	1.8826	3.1528	5.3058	0.768	0.0854	0.0902	2.334	0.456	9.6319	3.4308	6.104	3.2066	2.9298	2.7216	26.5157	2.1341	8.2072	4.3061	26.3931	6.5088
Prevotella_sp._OH937_COT-195	0.3425	0	0.0791	0	0.2875	0.1061	0.2312	0	0.333	0.0858	0	0	0.0219	0	0	0.0121	0	0	0.0178	0.445	0	0	0	0	0	0.019	0.0172	0.4783	0	0	0.0223	0	0	0	0	0	0	0.065	0	0.2843	0	0.2475	0.2201	0	0	0.6123	0.0201	0	0.1581
Clostridium_isatidis	0.7855	0	0	0	0	0	0	0	0	0	0	0	0	0	0	0	0	0	0	0	0	0	0	0	0	0	0	0	0	0	0	0	0	0	0.5689	0	0	0	0	0	0	0	0	0	0	0	0	0	0
Streptococcus_sp._CCH8-G7	0.1237	0.0761	0	0	0.1237	0	0	0.2215	0	0	0	5.8359	0	0.1064	0	0.1943	6.8466	0	0	0	0.3836	0.1438	0.141	0	0	0	1.6349	0	0.1473	0	0.3831	0.3241	0	0.2531	0.3026	0	0	0	0.3314	0.8012	0.1935	0	4.7301	1.0203	0.1914	0.3512	0.3337	0	0.8377
Bacteroidales_bacterium	0.0572	0	12.7038	0	0	0	0	0	0.1629	0	0	0.235	0	0	0	0	0	0	0	0	0.0546	0.3125	0.2409	0	0.1746	0	0.0589	0	0	0	0.4576	1.7682	0	0	0	0.6622	0	0	0.3303	0.8926	0	0	0.754	0	0.0762	0	0.2063	0.2168	0
Blautia_sp._YL58	1.8077	0	0	0	0.5047	0	0	0	2.5047	0.0837	0	0	0	0	0	0	0	0	0	0	0	0	0	0	0	0.3333	0	0	0	0.2324	0	0	0	0	0	0.1256	0	0	0	0	0	0	23.4401	0	0.1302	0	0	0	0
Bacteroides_fragilis	3830.45	234.781	29481.3	12458.6	8351.04	14538.5	6363.6	1385.47	28175.9	7329.68	1515.89	921.398	1475.36	69.2582	17808.6	2768.8	428.339	414.278	3771.69	11469.8	247.25	229.019	700.21	10422.5	145.988	3321.76	453.533	11077.7	120.575	540.173	138792	344.381	582.482	298.846	72192.2	792.88	136.411	7277.79	469.926	1676.63	401.714	24814.2	3633.87	1461.19	1294.39	14370.6	828.916	5975.39	5348.97
Ruminococcaceae_unclassified	549.203	273.777	543.21	113.402	610.305	302.984	1179.35	1514.44	406.594	1074.33	5897.19	369.291	425.137	344.133	2357.59	686.672	2657.79	1153.16	892.167	3616.83	528.031	320.987	636.377	4255.66	573.247	606.491	219.953	1315.14	256.298	264.564	1590.21	773.397	190.025	133.529	3362.99	2248.65	94.0037	3102.41	609.922	439.778	248.316	299.885	6539.22	3431.41	2646.25	1077	5619.77	3803.79	553.064
Bacteroides_clarus	49.3542	7.6987	340.14	340.235	78.5817	1003.4	272.391	34.9924	416.106	554.727	14.8526	2.2723	75.0419	0.0943	206.235	64.3785	26.9267	18.9432	269.058	472.758	1.0806	2.0342	2.1454	77.6438	1.1324	41.8212	4.4275	216.404	0.8018	1.1279	97.6309	5.6966	1.2676	1.3976	129.726	32.1292	0.2721	471.47	9.7162	23.8074	19.5368	301.112	23.9427	40.3464	31.4035	846.628	12.6815	119.215	55.4798
Escherichia_sp._MOD1-EC5189	1.2578	6.9778	0.8102	1.5572	0.2944	0	5.0298	2.546	0	14.6396	3.7893	4.7408	138.217	108.18	0	14.3329	35.6273	35.6362	22.7367	14.9507	2.5315	54.699	35.9212	7.6761	38.0095	39.3734	51.2102	13.023	21.8271	58.5671	1.7099	9.9607	166.965	65.344	8.5021	4.2887	59.1827	0.3327	0.2468	9.0953	87.9994	0.5543	0.2254	17.6676	17.3118	1.8809	1.1308	4.5365	44.1577
Bacteroides_graminisolvens	0.3684	0.2605	1.8606	0.5498	0.5643	49.5963	2.6937	0.8133	1.4002	19.8638	0.8544	0.0421	1.2709	0.0303	2.0729	0.4162	0.2161	0.624	2.9315	5.3116	3.0521	0.3916	3.9256	59.4017	2.2506	1.1725	0.0843	6.7917	0.0902	0.0974	2.4674	2.4351	0.4622	0.3722	2.2842	2.5819	0.2126	11.5575	0.3942	1.2784	0.4027	13.9062	12.9597	0.6095	2.9748	3.8054	1.0837	23.536	0.2216
Tannerella_sp._oral_taxon_HOT-286	0.2892	0	0	0.1947	0.1224	0.1075	1.7918	2.0044	0	0	1.2792	1.7516	0.0932	0.2631	0.5971	0.3267	0	0	0	0.2367	0.7468	0.3397	0	0	0	1.9892	0.3825	0	1.0428	0	0	0	0	0.1393	3.3457	0.1088	0	0	0.2052	0	0.1815	0.4325	0	1.175	3.6105	0	0.9116	0.8081	3.5188
Succinatimonas_sp._CAG:777	0.2766	0	0	0.1476	0.3977	0	0.0444	0.0849	0.4386	0	0.6691	0.2511	0.0168	0	2.1139	1.6389	0.4299	0.4034	1.0963	0	0.049	0	1.3782	2.8225	0.2872	0.5544	0.4847	0.4343	0.887	0.1017	0.5817	0	0	0.0137	0	21.2611	0	1.3481	0.0494	0.2612	0	0.0238	44.3499	0.1061	1.2649	0.4391	0.1851	1.5562	0.1102
Eubacteriaceae_bacterium_CHKCI005	3.9134	0.1984	2.2818	7.0379	1.1059	0.8162	6.9906	1.1513	4.5722	0.5497	3.2453	3.8611	1.2625	0.4342	0.1851	4.0288	0	0	0.2154	0.2848	3.0624	1.4456	0	3.0187	0	6.5011	0.25	1.2539	1.4481	0	0.5421	0	0.0617	0	4.0325	1.1607	0.1633	3.1232	1.1857	0	1.6248	6.9977	0.8463	5.5673	8.1928	0	3.4665	4.8433	10.8871
Escherichia_sp._TW15838	3.9529	0.5053	0	0	0	0	0	0	0	0	0	7.1468	0	3.4589	0	0.346	0.8382	1.4523	0.4073	0.3176	0	16.0794	1.6063	0.214	0.194	0.2168	0.6869	0.4965	3.3573	0.8315	0.1271	7.3674	1.5921	3.7199	0.2155	0.1226	0.9895	0.742	0	0	16.3738	0	0	0	2.7942	0	0.1146	0	0
Raoultella_unclassified	9.3818	8.0203	0	0.2556	0	0	28.3442	13.6771	0	33.5869	6.9475	46.2237	107.942	113.851	0.6275	18.7134	85.0242	28.2956	28.1508	37.3652	7.5657	54.3483	41.7064	11.423	57.1418	35.0886	119.186	180.392	1139.12	82.1897	12.922	595.467	97.9903	118.347	7.642	172.852	615.37	0	0.2566	84.7132	108.954	1.017	0	23.5599	20.2983	0.6518	15.2224	3.7708	39.9583
Streptococcus_sp._HSISS2	4.5444	0.71	0	0.0701	0.6053	0.082	0.3518	1.3827	1.1202	0.3306	3.0434	36.5979	0.0669	0.3861	1.5197	0.2165	9.3959	1.6837	0.2812	7.8969	2.3069	4.1144	14.028	45.0511	7.7777	0.2989	5.936	0.7	3.4769	0.243	8.8536	24.8689	0.9094	0.1578	0.5772	10.6581	4.4318	0.7698	6.3109	28.8682	1.9658	0	27.0127	7.0328	5.5271	0.9226	75.4322	5.7011	4.2704
Oscillibacter_sp._KLE_1728	71.5854	52.8607	396.455	51.6591	245.488	208.68	487.047	512.229	174.448	375.324	278.895	163.734	30.275	82.0637	164.019	181.432	112.458	239.566	268.995	218.714	211.207	147.93	270.651	211.762	280.179	365.572	229.097	324.541	65.8021	128.744	328.796	316.771	46.2172	99.3112	299.619	255.956	56.4476	340.29	176.827	774.062	111.587	91.8407	597.522	184.614	330.582	223.623	86.6206	586.153	97.7012
Shigella_unclassified	111.635	115.346	3.0825	9.8163	2.4345	0.3392	77.3799	66.4158	2.3	208.489	58.0288	289.521	1638.38	1425.08	2.316	147.473	579.192	515.011	309.773	390.246	34.624	643.754	383.573	106.841	478.033	474.437	647.561	182.621	374.009	695.84	17.9122	331.533	1071.87	885.444	123.265	30.31	682.483	5.9494	2.5663	53.0694	1182.6	3.1301	7.9674	231.005	173.302	7.4334	29.1756	39.8187	489.909
Campylobacter_coli	194.777	22.7116	44.7816	84.3123	121.566	146.165	99.5027	109.058	105.812	36.1801	160.8	126.303	7.8595	27.1953	179.046	109.106	15.3444	203.12	87.8285	35.5907	165.828	117.935	95.2146	35.8699	144.326	126.521	911.171	198.997	306.774	568.677	32.6638	45.5888	15.5821	425.496	72.1637	96.6143	6.5932	75.3327	45.0661	176.382	16.9177	23.5444	362.381	263.513	171.689	50.3302	15.0342	90.1177	34.5466
Ruminococcus_sp._AF41-9	95.1663	41.2549	54.6615	35.4743	95.2811	65.3869	169.699	231.129	75.7125	161.688	128.557	71.5803	15.1866	10.1003	93.0646	90.1535	61.1263	182.417	106.017	69.0466	138.509	96.1227	104.29	177.916	109.457	69.8596	76.0386	95.0952	60.8829	118.998	81.1798	116.492	18.4382	39.2136	179.454	80.3451	67.7569	220.403	90.4063	360.67	90.229	33.1722	298.047	144.573	218.583	67.1529	111.176	170.114	72.4419
Pseudoflavonifractor_sp._BSD2780061688st1_E11	90.7164	4.0152	29.894	2.0708	16.2914	28.3164	17.124	20.1336	9.8992	48.1794	12.7291	9.855	1.1782	1.1681	4.9429	2.6052	4.7126	2.916	5.7234	11.2563	1.6019	1.6665	17.054	9.4823	19.0011	8.3392	4.663	4.4799	1.6186	1.3171	12.0813	21.4621	1.237	6.254	7.9689	34.3861	2.2994	1.7188	6.7977	3.0441	41.1265	3.4764	6.8063	3.2784	7.9484	9.8217	2.8378	9.6216	43.6046
Anaerovibrio_sp._JC8	0.0445	0	0	0	0	0.0635	0	0	0	0	0.3906	0	0	0	0	0	0.6147	0	0	0.2495	0	0	0	0.4484	0	0	0	0	0	0	0	0	0	0	0	0	0	0.1943	0.0961	0.2125	0	0	0	0	0.0665	0	0	0	0
Gracilibacillus_thailandensis	12.8988	0	0	0.0758	0	0	3.83	5.3621	0.4503	0	0.8244	4.5457	0	0	0	0	0	3.2841	0.3377	0	15.4786	0.3239	5.2443	0	0.563	0.809	5.9391	1.9554	0.8699	0.8775	0	2.0675	0	1.352	0.1787	1.5252	0	0.1538	0	0.1121	0	0.2929	1.6672	14.4409	1.5796	0	0	0	0
Bacteroides_ilei	0.4636	0	5.5905	1.6015	4.8242	50.1855	1.7046	0.2603	1.3442	0.1219	0.1856	0	2.5925	0	0.7267	4.391	0.5532	0	0.336	0.786	0	0	0	0	0	0.5366	0	14.671	0	0	0.5695	0	0	0	0.0804	0.1874	0	2.4929	0	0	0	0.4371	0.4147	0	0.6287	8.9455	0	3.8754	0.2608
Kribbella_sp._NEAU-SW521	1.464	1.3965	3.1447	9.9546	19.2059	13.6289	17.8148	1.5565	3.0103	3.4246	0	0	0	0	0	0	0	0	0	0.2607	0	0	0	0	0	0	0	0	0	0	0.2706	0.3853	0.0628	0.0418	0.0884	0.1194	0.0812	0.3949	0	0.1975	0.0805	0.2175	0.619	0.1233	0	0	0	0	0
Schaalia_radingae	0.1913	0	0	0	0	0	0	0	0	0	0	0.7343	0	0	0	0.1038	0	0	0	0	1.6392	0	0.1506	0	0	0	1.9134	0	0	0	0.5721	1.0201	0	0	0	0	0.1484	0	0	0.2029	0	0	0	0.7093	0	0	0.6878	0	0
Geobacillus_sp._E263	0.029	0	0	0	0	0	0	0	0	0	0.1698	0.4348	0	0	0.0767	0	0	0	0	0	0.9333	0	0	0.3655	0	1.3333	0	0	0	0	0.5646	9.6026	0	0.1915	0	0.377	0	0	0	0	3.0134	0	0	0	0	0	0	0	3.0605
Pectobacterium_unclassified	0.8663	3.9233	0	0.2661	0.3187	0	1.6012	2.6026	0	6.9719	1.4475	7.4117	54.2731	43.5058	0	4.2309	13.9927	15.6334	10.4762	4.3152	0.6187	13.6478	13.0573	6.0235	15.1567	16.2046	12.6664	1.9276	6.1098	22.6708	1.1105	5.3905	9.5641	35.2637	5.6468	0.9522	21.2241	0.18	0	0.1313	38.2591	0.1714	0.4879	8.4139	3.0818	0	0.2225	1.7536	13.1997
Bacteroides_sp._AF17-1	28.965	0	3.937	22.7358	6.104	4.7881	1.2232	0.3666	0.9466	1.3003	3.796	1.8011	0.5082	0	67.4839	2.1708	0	0.705	20.7251	2.6094	0.8037	0	0	0.2487	0.381	1.6376	1.9947	2.5961	0	0.5521	0.4431	1.0581	0	0.0592	3.69	0.285	0.1395	2.2375	0.3198	0.7892	0	5.3576	1.5715	1.9928	2.1098	2.4373	0.1617	30.3269	2.9208
Dialister_sp._Marseille-P5638	0.3287	0.0824	547.132	0	0	0	0	0.4604	670.088	346.209	2222.47	0.1356	0.1325	0.0996	0.2123	0.1335	1.7237	0.266	0.2009	26.3033	0.2788	0.1958	13.1525	22.8533	29.3627	0.381	0.5232	0.4212	0.2645	0.2704	1.052	0.1681	0.0915	4.3953	0.1206	2390.68	0.3454	0.4344	0.2898	17.8491	0.0327	0.121	1.2246	138.276	283.162	2265.48	24.0204	229.616	1.4975
Shigella_flexneri	1389.72	888.114	19.1042	82.801	21.1477	4.6273	674.178	552.685	18.9144	1859.65	453.178	2998.21	13591.6	12240.8	17.0136	1329.27	5561.63	4182.78	2727.38	3098.42	329.939	5524.55	3468.83	923.072	4264.88	3937.26	5453.16	2015.78	5324.58	6346.21	152.129	5325.57	10249.5	8511.86	1056.5	595.14	6955.23	53.916	29.3864	1124.6	10840.8	29.4591	35.947	2193.96	1609.09	82.6291	238.472	347.514	4006.88
Subdoligranulum_sp._4_3_54A2FAA	144.894	21.7993	115.598	19.1274	122.981	115.68	446.099	572.991	108.879	229.562	1207.76	108.563	70.0767	47.1679	473.702	149.221	540.341	220.219	213.903	795.556	123.447	145.382	86.1732	821.524	113.68	62.3635	34.8003	285.698	130.705	124.971	321.693	128.018	6.021	8.3613	634.569	600.594	23.4367	615.888	176.663	229.811	54.9168	17.7508	1466.3	742.537	564.738	331.9	1076.5	745.878	72.1015
Clostridium_phoceensis	28.6356	500.649	14.4715	10.696	101.988	46.0989	36.2685	27.0619	34.9598	32.222	48.4314	28.1281	3.6229	6.5787	110.253	5.7583	7.4189	12.5514	7.4364	35.6475	11.2653	245.53	15.1723	58.4204	18.3824	23.0578	13.7337	12.3161	20.1081	16.3653	116.024	10.7128	10.0709	3.3638	14.713	104.096	26.1275	358.546	1.4151	54.8505	3.0451	17.3648	36.6028	3.8952	62.4526	16.2925	4.4712	85.1871	8.3993
Prevotella_sp._885	28.1905	0.9528	102.137	79.1191	25.9909	89.6003	52.5944	7.7244	51.3631	35.8418	32.2532	17.8486	11.7389	0.6673	32.6275	17.1925	7.6846	2.5573	31.5286	65.0655	2.3809	1.0867	0.2578	16.9015	1.1685	29.6197	5.1992	37.4355	1.3635	0.9158	27.4256	0.9883	0.0829	0.1326	23.0897	7.3799	0	64.5186	4.9384	6.3644	0.2832	138.319	55.348	7.8975	10.8582	136.181	8.7357	18.2889	16.9535
Clostridiales_bacterium_VE202-27	14.1053	13.9933	3.7796	3.0041	17.3887	3.85	26.4476	30.1262	18.2372	38.1991	15.4649	2.2795	1.7997	7.8019	3.4801	12.484	3.041	13.3825	12.9661	11.4471	13.0878	3.8006	6.8956	13.7643	5.5564	3.9152	4.5888	2.6671	5.3435	7.7266	8.0517	5.2418	0.4256	0.4532	16.3513	28.7081	2.3032	9.8434	5.2986	20.2346	5.1862	4.0161	24.9515	8.8702	64.8868	18.3019	1.1427	24.37	14.0828
Olsenella_sp._GAM18	0.1469	0	0	0	0	0	0	0	0	0	0	0	0	0	0	0	0	0	0	0	0	0	0	0	0	0	0.2543	0	0.1813	0	0	0	0	0	0	0	0.0855	0.9615	0.2378	0.2337	0	0	4.3425	0	0	0	0	0	0
Actinomyces_nasicola	0.1503	0	0	0	0	0.5713	0	0	0	0	0.5859	1.3846	0	0	0	0	0	0	0	1.1228	0.7513	0.1534	0.4733	0.5044	0.2286	0	2.5442	0	0	0	0	0	0	0	0	0	0	0	2.4869	0.1594	0.065	0	2.3698	0.0929	0	0	0.6755	0	0.1519
Oribacterium_sp._NK2B42	21.5553	0	0	0	0	1.4424	0	0	0	0	0	1.5832	0	0	0	0	0	0.0931	0	0	0	0	0	0	0.0684	0	0	0	0	0	0	0.5217	0	0	0	0	0	0	0	2.1702	0	0	1.042	0	3.481	0	0	0	0
Acholeplasma_palmae	0.0501	0	0	0.0539	0.0967	0	0.5833	0.0929	0	0	0	0.3461	0.0368	0	0	0.2039	0	0	0	0.4678	0	0	0	0	0	0.5111	0	0	0	0	0	0	0	0	0.8888	0	0	0	0.1081	0	0.0975	0	0	0.2322	0.1497	0	0	0.1065	0.3798
Alkalibaculum_bacchi	0.6072	0	0	0.1231	0	0	1.5262	0.5311	0	0	1.1718	2.1659	0.1728	1.1261	0	0.7211	0	0	0	0	0.7555	0.4201	0	0	0	2.0831	0	0	0	0	0	0	0	0.2818	2.0013	0	0.1824	0	0.0618	0	0	0.2379	0	0.3632	3.1199	0	1.5808	3.7979	4.1972
Proteobacteria_unclassified	7352.73	6534.43	109.638	596.069	131.808	34.2177	4413.38	3716.38	116.485	12571.6	2937.39	20713.8	94360.5	82521.6	115.584	8872.72	37070.2	29295.5	18198.9	21175.9	2197.47	37239	22739.1	6283.2	28964.1	27321.7	37511.9	13010.2	35034.4	43079	1015.59	28438.6	69557.1	56353.5	7291.87	3882.12	47255.7	344.628	181.957	4690.69	76106.8	222.875	222.651	14422.8	10623.7	647.418	1595.06	2292.27	28019.7
Clostridium_sp._AM22-11AC	3301.65	84.8335	601.322	716.233	1330.58	1268.14	846.116	1246.62	476.734	299.25	1514.5	7899.75	52.9473	354.942	631.316	1098.45	113.875	1327.93	253.048	170.963	2413.79	723.97	1787.73	188.781	1000.88	593.106	9816.15	634.895	3133.51	7015.37	154.609	721.098	40.3426	4698.16	170.206	563.847	139.648	368.761	92.0324	1078.13	260.531	243.157	3405.9	5327.04	1687.57	182.009	61.8999	378.971	133.649
Acutalibacter_sp._1XD8-33	49.3201	45.7342	91.4614	30.3298	139.062	109.55	176.451	275.564	77.0597	229.092	138.064	39.0843	34.3085	51.3083	121.263	58.7965	36.7258	209.938	112.395	66.1924	137.006	86.3755	204.124	67.8747	145.843	185.343	234.093	126.226	73.7528	127.133	83.0756	144.329	20.0737	55.9543	72.8683	147.626	29.5693	241.422	58.3834	237.206	54.806	47.7705	354.607	169.943	149.346	60.1899	122.781	187.957	128.792
Acidaminococcus_intestini	64.5456	364.499	90.7839	77.693	65.7631	15.9453	170.001	214.526	22.3435	65.6757	104.112	24.8327	5.5124	25.1528	124.011	25.879	8.7384	91.717	82.5167	116.031	96.4658	24.8818	110.08	30.032	388.64	70.6153	39.3006	28.4895	8.1534	30.4324	227.191	42.0864	1.6763	12.7182	16.704	78.4926	16.3563	536.469	14.4696	145.822	7.4156	12.4701	802.636	138.632	124.333	68.6478	33.4517	106.956	81.45
Dorea_sp._CAG:317	17.3603	24.2938	1.8572	2.2363	4.2668	0.2702	26.6919	21.3129	1.6653	55.3485	9.5222	33.1437	285.272	310.144	6.2174	41.2779	148.606	111.911	74.6687	33.756	12.8864	158.396	108.543	32.2632	112.62	105.03	190.594	147.73	952.514	141.863	17.4971	575.484	224.946	265.913	30.8345	165.719	605.63	5.7317	7.1361	86.4907	306.588	1.6505	4.5636	58.5312	64.801	2.2289	114.105	13.648	77.8681
Clostridiales_bacterium_CHKCI006	4.4918	22.9808	27.6513	14.864	17.7214	37.6711	82.96	119.914	14.269	110.4	31.0589	4.1084	5.5978	6.0063	13.0693	44.8604	13.6207	18.7751	13.8753	104.05	27.7289	38.1366	23.6932	13.6395	49.2821	10.7601	18.0759	14.9423	7.7026	56.3798	24.8445	32.8927	0.8955	4.43	28.1242	15.2179	21.8176	42.3074	34.0566	19.5825	10.4159	3.4932	58.9614	25.3971	35.6393	20.4833	12.7583	53.5986	11.569
Blautia_sp._AF32-4BH	6.5397	18.3939	6.3596	8.4617	15.7599	14.7621	2.859	6.0793	2.9841	8.9245	1.5659	1.1663	1.5946	1.1912	6.2088	18.7216	0.5095	38.7216	1.6516	5.194	148.715	15.1603	119.954	17.9267	114.542	38.0693	4.8118	1.512	21.2595	2.9512	38.162	92.7121	4.4414	19.6545	43.8657	18.7747	24.9259	22.1348	11.5113	28.9416	27.9451	3.0178	17.2684	10.2125	35.8734	3.5928	59.4575	1.934	16.6115
Anaerococcus_sp._Marseille-P9784	0.1552	0	0	0	0	0	0	0	0	0.0795	0.121	0.548	0	0	0	0.101	7.3026	0.1285	0	0	0.0665	0.0317	0	0.2083	0.0708	0	0.5015	0.0302	0.0511	0.0184	0.4331	0.0276	0.1047	0.0372	0.1049	0	0.1445	0	0.1116	0.1316	0	0	0.0612	0.2301	0.0927	0.0567	0.0279	0.1319	0.1569
Clostridium_frigidicarnis	0.1853	0	0	0.0809	0.3564	0	1.0226	0.3725	0	0	0.2083	5.6614	0	1.527	0	1.3308	3.8381	0.6449	0.1658	0.7046	1.3614	0.1331	3.9778	0	0.3159	1.536	0.6391	0.2145	0.4556	0	1.7249	0	0.3737	0.196	1.0607	0.6399	0	0.1602	1.0999	3.7434	0	0.1983	3.3547	0.5745	4.7161	0.4027	3.2537	1.4918	1.2719
Bacteroidaceae_bacterium_HV4-6-C5C	1.3953	0	0.4659	4.4665	1.8364	1.3557	1.3841	0	2.2783	0.4566	0	0	0.1747	0	0.9256	0.1935	0	0	0.6301	2.6422	0	0	0	1.0399	0	0	0	0.6031	0	0	0	0	0	0	0	0	0	0	0	0	0	1.7287	0	0.4408	0	4.0166	0	5.6654	0.5408
Trabulsiella_unclassified	12.1923	9.1066	0	1.508	0	0	7.3285	3.6036	0	17.6126	6.6252	29.8221	132.112	120.952	0	11.6801	42.3411	37.0331	27.5285	32.2453	2.8895	51.6409	30.8367	11.4078	37.794	31.0979	48.8196	14.494	38.3509	62.9388	0.3227	26.6141	94.3751	73.1487	10.8029	2.9573	50.8626	0.9418	0.1164	3.9478	93.9046	0.2242	0	18.7048	12.5738	1.7748	2.037	2.5225	34.3587
Caloramator_sp._ALD01	0.0512	0	0	0	0	0	0	0	0	0	0	0	0	0	0	0	0	0	0	0.1912	0	0	0	0	0	0.3917	0	0	0	0	0	0	0	0	0	0	0	0	0.8839	0	0	0.4254	0	0	1.3767	0	0	0	2.484
Ruminococcus_sp._AF16-40	4.6105	789.452	317.204	0.8911	862.725	1074.23	6.2341	7.4906	41.3325	555.61	115.455	1.3326	3.5174	2128.98	454.978	1.3257	1817.34	3.1666	865.388	390.926	3317.7	0.9385	320.549	325.121	4278.87	2722.94	13.7376	4.2601	2.459	16.085	161.397	1242.56	0.2014	0.2892	1972.25	134.604	0.4269	3.389	3967.9	240.556	77.526	15.7018	338.949	256.561	808.799	238.379	6477.42	65.6066	0.8027
Bacteroides_oleiciplenus	1207.11	1.1373	3318.97	2904.69	273.943	1329.22	93.958	16.5608	468.972	271.984	23.8993	3.6652	64.8991	1.1155	632.043	754.42	13.8867	24.7655	454.051	352.32	25.0059	9.1931	3.2239	15.7515	0.2307	122.664	13.6941	628.937	1.2741	5.6017	1241.08	4.6702	0	4.4145	228.266	116.611	1.1632	181.071	54.8589	7.1586	16.8337	223.69	53.1294	110.234	67.9099	551.546	220.734	731.528	37.492
Bacteroides_acidifaciens	38.4473	0.1502	99.4785	110.126	48.9811	103.444	79.3727	13.9891	66.7407	98.1551	7.7258	0.4341	36.3384	0.3757	155.405	24.9741	3.3581	4.2757	64.1851	117.064	0.6814	0.38	1.1472	17.4417	2.1207	16.4572	2.4248	51.5299	5.3665	1.4036	95.9342	3.6093	0.5717	0.8433	43.8112	5.1109	0.0912	101.353	2.4119	19.7387	4.1447	38.0077	31.4167	54.1903	11.5185	191.033	22.2491	93.2837	14.4839
Bacteroides_sp._CAG:530	18.5213	0.2059	277.996	101.423	150.155	115.081	69.5877	14.9806	60.9664	72.4834	3.4722	1.396	12.7083	0.5752	47.7883	13.8353	1.7074	6.0283	57.3045	112.626	0.0569	4.8628	0.4761	26.5069	0.4827	51.7701	4.2617	122.307	0.8769	3.0443	42.6746	2.0196	0.1753	1.1114	33.8758	10.9247	0	37.7897	2.3914	17.1793	1.2353	264.05	59.2598	7.3944	10.6693	185.984	22.5995	52.0014	18.3184
Ruminococcus_gauvreauii	7.9055	0.9062	0.9284	2.2824	3.0161	3.4404	9.9255	11.2838	0.9147	4.6343	11.9445	10.5147	0.974	2.4985	4.9762	6.1615	0.5948	1.7874	6.2865	3.6109	9.1998	4.464	1.8612	11.0106	1.6261	15.6957	0.8491	1.2841	8.0071	2.2061	0.2239	0.6033	4.256	1.355	14.3795	7.3187	2.0767	3.6474	2.2732	3.0218	1.3331	3.095	6.5079	7.1801	26.2225	8.1591	9.9834	23.7035	22.9621
Coprobacillus_sp._8_1_38FAA	4.1179	9.4079	10.9417	1.5218	5.467	4.0361	9.2399	10.5058	8.2215	3.954	4.139	4.1496	0.0946	0.1069	3.5664	0.6284	5.0752	14.5894	7.2447	5.0476	113.726	4.6316	11.55	6.8028	4.5516	13.293	7.2782	21.608	13.976	14.0746	11.1611	18.5302	0.3257	9.8735	8.4807	13.5512	2.8459	8.4241	1.5276	13.7159	5.508	1.2031	28.9155	25.5295	4.2297	0	30.7158	0.8205	26.5383
Alistipes_sp._5CBH24	1.9819	0	68.5672	0.2866	0	0.9975	16.8106	4.0182	1.2772	70.9401	0.0974	0.1535	28.0139	0	6.2877	22.5257	6.3707	0	36.4794	0.1394	0.1688	0	0	0	0.076	0	0.0385	0.3892	0	0.1552	108.561	0.1439	0	0	45.776	0.2037	0	68.2797	0.036	0	0.4105	1.0895	0.7615	0.0731	1.6175	221.357	2.3933	0.0708	0.1195
Caproiciproducens_galactitolivorans	51.8703	1.8323	285.79	47.7706	89.5614	33.3479	166.594	116.866	60.6135	24.4247	116.378	218.251	28.7451	30.6169	17.4626	91.1825	10.294	40.0559	33.9332	77.132	116.623	52.001	1.5921	15.9333	1.1479	224.281	5.9577	128.06	136.961	7.1224	22.3981	1.4804	1.2605	15.5294	165.185	524.991	8.1766	44.5209	30.1037	7.977	18.6345	80.5569	185.383	131.78	316.837	30.2915	129.205	203.767	293.992
Ruminococcus_sp._CAG:254	6.814	6.4141	17.4651	5.3225	18.7577	11.4611	10.5944	19.3855	22.1576	30.6097	88.5171	9.0715	6.9169	1.4785	15.5118	20.3369	15.6228	66.1263	26.8639	21.0633	10.7996	22.0375	20.8006	57.6171	44.0005	28.8155	19.9234	14.6248	19.5493	21.8566	31.6258	15.7881	10.179	3.5895	6.7031	38.4812	10.5614	32.2661	10.4648	49.2158	9.1806	40.6302	162.161	11.5916	38.7515	21.3602	57.7267	29.3718	10.0005
Clostridium_sp._CAG:452	23.3298	0.4776	58.65	51.1064	16.235	69.4709	3.4362	1.062	27.2437	25.7876	1.5746	2.7381	9.3271	4.8434	7.9709	3.9046	5.192	1.3617	5.9491	6.1969	0.5248	2.5538	1.6957	21.0391	1.7787	8.3733	2.032	22.9073	1.0331	2.4381	16.525	2.4054	4.4199	4.1967	13.3896	5.1099	1.9851	12.3692	0.4283	0.3881	3.9395	21.096	35.0053	4.4688	4.4012	69.2488	2.0971	30.2456	10.4484
Streptococcus_phage_YMC-2011	1.3706	0	0	0	0	0	0	0	0	0	0	3.7746	0	0	0	0	0	0	0	0	0	0.1013	0	0.4269	0.0804	0	0.1154	0	0.0617	0	0	18.8255	0	0	0	0.3582	0.0513	0	0.2428	1.9812	0.11	0	3.0871	0	0.9513	0	0	0	0
Butyricimonas_sp._Marseille-P4593	0.4586	0	1.3804	0	0	0	0	0	0	0.6288	0	0	0	0	0.2607	0	0.2561	0	0	0.2426	0	0	0	0	0	0	0	0	0	0	0.0971	0	0	0	0	0	0	2.1555	0	0	0	0	0	0	0	2.871	0	0	0
Paenibacillus_sanguinis	7.3699	0	0.2106	0	2.6015	0	0	0	0	0	0	0	0	0	0	0	0	0	1.8985	0	0	0	0	0	0	0	0	0	0	0	0	0	0	0	0	0	0	0	0	0	0	0.7409	0	0	0	0	0	0	0
Clostridiales_bacterium_CHKCI001	11.6343	0.0933	0.4579	1.2927	3.2253	0.1887	3.8309	5.531	8.0468	1.4193	4.7644	3.3808	0.6583	0.2284	0	4.1614	0	2.9915	2.3339	2.3931	4.0478	1.0133	4.7462	0.5722	3.5478	2.1459	1.3939	3.5972	3.2663	24.4417	2.7875	1.5429	0	5.5307	2.7276	5.4708	0.2996	3.4252	0.2013	3.6907	0.1878	0.6926	7.7808	8.8325	6.3636	8.398	1.4899	3.6695	3.0973
Brevibacillus_sp._LEMMJ03	0.1971	0	0	0	0	0	0	0	0	0	0	0	0.2494	0	0	0.3546	0	0	0	0.2055	0	0	0	0	0	3.1986	0	0	0	0	0	0	0	0	0	0	0	0	0	0	0.0565	0	0	0	2.3154	0	0	1.4029	0
Fibrobacter_sp._UWH8	0.0941	0	0	0	0.1818	0	0.1827	0	0	0	0.2753	0.1084	0	0	0	0	0	0	0	0	1.1093	0.0721	0	0	0	0	0.2173	0	0.6971	0	0.1408	0.251	0	0	0.1193	0	0.3287	0	0.7112	0.2995	0	0	0.2783	0.0873	0	0.5162	0.1269	0	0
Erysipelotrichaceae_bacterium_SG0102	1.3487	51.1446	1.4335	0.87	3.1254	1.9228	10.4693	13.5133	3.4467	3.6261	2.3662	1.5532	0.793	0	0.356	1.5369	0.5319	5.0271	1.9386	6.5498	3.7564	6.8166	7.0083	1.3581	1.8466	1.376	0	2.3632	1.3316	2.1587	0.4034	2.5176	2.4577	1.4552	1.0256	5.4476	0.314	8.8291	0.5822	2.1456	0.1749	0.2802	13.5578	6.7517	13.7022	8.8741	3.6376	4.5863	1.4316
Escherichia_coli	41592.9	28620.5	2114.93	4056.44	2354.35	1506.18	21188.4	18083.5	4109.77	60856.6	14788.8	118147	427934	379625	1581.47	42473	181878	131034	82944.2	113204	12851.2	178682	104051	29075.1	123216	120873	169906	70610	156316	191559	6337.37	146513	355869	261159	32930.1	22312.4	223969	3050.01	2558.74	26942.5	348386	3096.98	4151.46	75582.9	49577	4396.17	9533.76	12135	129520
Bacteroides_uniformis	2933.66	61.6499	9944.77	6268.97	4899	5109.52	6936.53	1417.53	4201.59	8868.38	458.96	542.937	1070.65	132.261	5114.03	1388.69	472.832	763.838	5439.83	18863.4	295.942	227.154	229.233	2764.2	413.982	1554.63	565.78	5865.07	322.455	334.977	3928.67	499.972	28.6541	320.496	2953.66	987.941	45.713	7775.87	478.002	479.932	190.848	6430.65	1388.78	1490.25	784.482	24980.8	609.98	7266.97	773.203
Gammaproteobacteria_unclassified	384.758	114.793	6.2795	8.9337	2.6464	9.3406	95.0515	81.7626	11.5567	518.355	29.2656	1275.02	2078.81	1346.35	3.8218	159.275	1575.43	421.004	456.287	576.968	85.739	832.655	335.62	99.3581	301.159	242.562	488.742	504.652	3292.93	476.206	63.8981	2824.79	2724.75	1590.29	102.496	505.83	2085	8.0859	22.4778	535.142	2266.08	7.524	14.2025	388.894	170.714	21.0384	49.5007	42.1587	349.566
Bifidobacterium_callitrichidarum	0.6615	25.8298	4.8462	0.4254	1.1104	2.1088	7.0038	12.9655	0.9776	2.9178	1.1208	20.4399	0.3567	0.213	4.0593	0.2919	6.0045	43.3212	0.2611	1.6312	0	0.4013	1.2212	0.2257	2.1938	17.8626	0.6351	1.1171	1.0759	14.0628	1.6249	6.6008	0.7316	0.3289	2.0411	0.9833	0	0.3339	71.7975	8.1043	0	0.981	2.4951	0.0716	2.4824	0	13.0208	0.1084	20.3791
Pseudomonas_abietaniphila	0.3837	0	0	0	0	0	0	0	0	0	0	0	0	0	0	0	0	0	0	0	0	0	0	0	0	0	0	0	0	0	0	0	0	0	0	0	0	0	0	0	0	0	0	0	0	0	0	0	0
Xenorhabdus_bovienii	0.2768	0	0	0	0	0	0	0	0	0	0	0	0	0	0	0	0	0	0	0	0	0	0	0	0	0	0	0	0	0	0	0	0	0	0	0	0	0	0	0	0	0	0	0	0	0	0	0	0
Citrobacter_sp._AAK_AS5	7.0759	4.5407	0	0.2693	0.2418	0	5.8329	6.0417	0	18.7596	4.0281	18.1728	68.2042	72.7951	0	9.9896	48.652	22.9512	21.0018	18.9477	1.744	30.4017	18.6358	6.6206	18.8618	21.881	43.222	49.5558	271.414	40.3133	5.0565	164.309	48.749	47.4446	4.603	40.4679	183.087	0	0.2703	32.6738	66.1126	0.3903	0	15.0932	8.6071	1.3734	1.8578	1.3309	24.5931
Lachnospiraceae_bacterium_AC3007	0.4749	0	0	4.2413	0.1411	0	0	0	0	0	0	0	0	0	0	0.6541	0	0.1135	1.0501	0	0.0783	0	0	0.7356	0	0	0	1.4934	0	0	0.9832	0	0	0.1752	0	0.2108	0	0	0	0	0	2.049	0.216	0	0.2183	0	0	0	0
Escherichia_virus_K1G	0.0788	0	0.2792	0.113	0	0.3745	0	0.3899	0	0.6053	0.1536	0.6655	0	0	0	0	0.4144	0.1632	0	0	0	0.0805	0	1.7192	0.0599	0	0.8489	0.3835	0.6484	0.1401	0	0.4203	0	0.1889	0	0	0.4892	0.5732	0.0567	0.1671	0.4088	0	0	0.0974	0.157	0	0.2125	0.335	0.5178
Prevotella_intermedia	15.4085	0	14.8497	4.16	4.2456	1.0657	1.9626	0.4895	3.2306	4.9821	0.5956	0.0696	5.0058	0	18.3953	0.8589	4.5824	0.4097	4.9509	2.2149	0.0942	0.0337	0.6915	1.3928	0	1.2897	1.4254	1.0585	0	0	0.5918	0.8794	0	0.0447	12.5317	0.3806	0.1535	6.5911	0.128	0.306	0.4304	1.2969	0.7588	5.503	0.9655	13.6253	0	4.4857	0
Megasphaera_sp._Marseille-P4857	0.0583	0	0	0	0	0	0	0	0	0	0	0.0672	0	0	0	0	0	0	0	0.1092	0.8139	0.2682	0	0	0	0	0.0675	0	0	0	0	0.1557	0	1.2086	0	0	0.1698	0	0	0.5572	0	0.0607	0	0.0542	0	0	0	0	0
Bacillus_sp._CGMCC_1.16541	0.0662	0	0	0	0	0	0	0	0	0	0	1.1429	0	0	0	0	0	0	0	0	0	0.1013	0	0	0	0	0.2291	0	1.3065	0.353	0.4947	0	0.0335	0.0793	0	0	0	0	0	0	0	0	0.1956	0	0	0	0	0	0.1505
Actinomyces_sp._HMSC075C01	0.0668	0.1588	0	0	0	0	0	0	0	0	0	2	0	0	0	0	0.5269	1.6597	0	0	3.1482	0	0	0.3363	0.3048	0.3407	4.78	0	0	0.2376	0.3995	0	0.3381	0	0	0.3854	0.7774	0	2.7392	2.3376	0	0	1.5798	0.1238	0	0	2.522	0	0.3039
Bacteroides_thetaiotaomicron	1077.68	115.809	2870.9	2448.14	1826.31	2488.39	1081.68	255.602	2084.29	1621.14	384.979	267.925	622.432	89.2967	2633.46	831.029	116.193	200.367	1315.26	4249.84	119.407	240.408	149.343	1988.8	112.921	911.929	142.67	1760.02	157.914	105.941	1062.31	221.523	374.325	141.234	1279.75	332.631	170.091	2029.83	144.275	237.803	171.761	2078.04	543.951	624.118	259.142	5566.48	148.445	2719.35	542.22
Firmicutes_bacterium_AF16-15	84.5299	59.0751	113.326	33.8584	165.363	157.359	519.557	701.25	150.077	258.172	247.047	75.4809	13.3602	4.3834	89.9655	136.418	194.033	299.236	375.117	219.105	57.6233	69.346	666.624	200.523	110.512	44.6837	34.8635	53.1532	55.0805	232.048	154.223	412.74	37.6047	40.8927	37.7213	182.575	27.7481	335.892	380.474	2558.23	183.61	55.2215	172.505	60.6514	437.078	178.067	48.7379	121.574	71.0423
Veillonella_tobetsuensis	96.7252	55.3003	0.707	0.9282	52.3749	127.123	6.0454	6.5491	3.1588	7.2707	3.737	6.5527	1.7739	1.2013	16.8818	26.2824	7.5387	501.815	2.6755	1239.57	25.7202	630.713	197.82	34.4676	86.3074	26.4618	40.5506	3.1639	2.8745	1.5753	4.2032	43.9012	111.925	14.8925	75.4383	7.8021	19.0056	4.379	58.8994	416.73	148.628	65.7855	19.553	137.848	55.2999	2.437	9.3986	5.5762	79.7103
Kluyvera_ascorbata	6.8974	24.3072	0.1409	0.4528	0.1168	0.1514	5.8066	2.9699	0.2546	230.601	3.1284	21.0986	67.5651	67.5091	1.7393	10.9679	456.436	22.4346	14.8517	19.1489	2.1959	26.91	24.8734	7.808	21.4903	26.1495	30.8594	26.1368	103.838	30.9723	1.5848	81.2084	51.4776	42.6789	14.2675	29.8535	91.4727	0.4208	8.7404	25.2797	51.7935	0.142	0.1815	11.6623	11.0837	0.2139	8.3764	0.8371	23.1288
Butyricimonas_faecihominis	15.5573	7.123	36.6513	17.9986	12.2897	11.6609	30.5871	23.5665	14.42	28.8676	9.6447	11.6132	10.1967	4.2602	79.6191	38.3489	3.5905	27.6204	8.7498	35.4647	7.7184	9.6453	24.4428	14.3447	12.8924	10.5174	10.7504	70.4604	12.8875	11.9549	13.2499	7.433	15.08	16.5104	31.8683	8.207	11.4511	64.3994	10.5051	8.6553	15.4725	38.5274	11.316	12.8248	15.8428	47.6793	6.5241	23.0733	16.2447
Clostridium_sp._29_15	0.7688	13.303	0.8349	0.116	1.0622	0.2477	2.607	0.5311	0.2163	5.4768	17.7926	2.3081	0.7526	1.9706	0.6432	15.341	0.5527	2.7709	10.1364	4.7043	59.4619	25.8942	2.6523	9.7002	18.1498	1.6593	21.3268	1.2881	4.0553	5.3307	17.1625	4.4906	0.1534	0.3936	1.9074	10.744	0.1956	1.1339	5.3197	9.1449	0.3451	9.565	5.5572	18.5152	7.7835	1.5696	1.1061	3.481	0.2715
Bifidobacterium_sp._MSTE12	0.5727	0.0451	3.4248	0	0.8785	0	0.2943	0	0	7.9615	0	12.2244	0	0	0	0.3086	4.4611	28.0251	3.521	0.832	0	0	0	0	1.5571	7.7354	0.0875	0	0	9.1691	2.9155	0	0	0.6145	0	0.5469	0	0	55.1096	1.9298	0	0	0.6725	3.1593	0.7929	0	0	0	12.9343
Enterobacter_sp._18A13	0.6099	1.0874	0	0	0	0	8.6789	4.5262	0	1.9519	0	2.5752	11.3547	12.1536	0	0.6618	11.2244	1.8943	4.6265	2.6579	0.4355	2.6464	1.6805	0	1.8555	1.5555	3.9889	4.4523	5.5195	6.3267	0	3.2525	5.2478	34.3627	2.0611	4.9852	6.8618	0	0	0.9702	10.2831	0	0	1.6961	1.2149	0	0	0	4.778
Pseudomonas_sp._GM78	0.421	0	0	0	0	0	0	0	0	0	0	0	0	0	0	0	0	0	0	0	0	0	0	0	0	0	0.1652	0	0	0	0	1.4306	0	0	0	0	0	0.3518	0	0.3688	0	0	0	0	0	0	0	0	0.1085
Neisseria_mucosa	0.0948	0	0	0	0	0.3999	0	0	0	0	0	0.8615	0	0	0.0823	0.0254	0.3688	0.3428	0	0.2958	0	8.0261	0.7393	0.1569	0.0356	0	0.9773	0.091	0.3078	0.0277	0.1437	0.5471	0.159	0.0187	2.0212	0.0899	0.2902	0	0.6083	2.0493	0.3301	0.2293	0.5529	0.289	0.3337	0.1709	0.1681	0	0.1891
Leuconostoc_unclassified	4.5502	2.6215	0.5324	2.4338	0	2.4284	1.8179	2.651	0	1.0964	7.0442	163.009	2.4264	0.3216	0.5721	17.5926	1.5037	9.9354	6.6257	0	0.4311	0.9591	71.859	14.5182	9.3477	0.3657	1.9083	0.2726	6.5213	0.4263	5.5762	24.0168	0.0513	0.2993	10.3447	12.8976	0.0523	67.1913	0.2537	1.9402	16.459	0.2082	1.075	2.36	30.4969	0.4446	5.4448	22.1088	1.0605
Erwinia_mediterraneensis	0.0422	0.2511	0	0	0	0	0	0	0	3.8945	0	0	39.6208	3.9292	0	0.4814	2.3328	5.5117	1.6194	0	0	0	0.5987	0	0.1928	0	0.0975	1.1104	0	0.4508	1.3899	0.9013	0	1.1143	0.3213	0	0	0.3688	0	2.1507	0	0	0	0.0783	0.2525	0	0.4558	0	0
Lachnospiraceae_bacterium_XPB1003	1.4393	0.9263	0	0.7487	5.4629	0	0	0	1.2711	0	0.5696	0	0	0	0	0	0	0	0.1192	0	0	0	0.235	3.1877	0	0.1269	0	0	0	0	0	0.2597	0	0	0.2522	0	0	0	0	0.3099	0	0	0.5882	0.1806	0	0	0	0	0
Rothia_sp._HMSC061C12	0.0618	0	0	0	0	0	0	0	0	0.1187	0	4.1985	0	0	0.1631	0	0.6093	0.7677	0	0.6925	0	0	0	0	0	0	0	0	0	0	0	0	0	0	0	0.2674	0.0719	0	0.5335	0.5898	0	0	1.6442	0.1146	0.1846	0	0.25	0	0.5153
Thermosediminibacter_litoriperuensis	2.1157	0	0	0.2527	0.3026	0	0.5322	0.2908	1.5019	0	0	0	0	0	0	0	0	0	0.1408	0	0	0	0.0925	0	0	0.2998	0.4522	0	0	0	0	0	0	0	0.3973	0	0	0	0	0	0	0	0.9267	0	0	0	0.5284	0	0.0594
Clostridium_homopropionicum	2.1983	0	0.1569	0.3053	0.3992	0	1.7008	2.2341	0	0	1.9936	2.8429	0.0868	0.1471	0	2.6773	0	0.1649	0	0.7219	1.4235	0.2261	0	0.1487	0	1.6927	0.6642	0.2587	1.312	0.2045	0.0442	0	0	0.4139	4.1039	0	0.1375	0	0.3679	0	0.0383	0.4908	0.2266	1.3688	4.1329	0	1.962	1.33	2.5258
Salmonella_enterica	641.123	308.067	30.9254	32.5942	16.2648	12.8619	379.916	326.065	127.015	1123.09	237.714	1698.15	3983.76	4665.75	10.677	648.946	3048.2	1364.94	1139.55	993.548	145.564	2456.3	1273.64	444.211	1429.21	1091.56	2005.14	1830.55	9148.56	2096.57	177.838	6255.08	3341.1	4085.58	337.294	1544.51	7150.11	51.4953	27.3398	1262.93	4267.16	28.597	80.0291	860.283	608.952	83.9634	195.566	173.309	1258.28
Enterobacter_roggenkampii	100.819	19.5177	125.661	80.2902	81.5986	108.662	74.4348	37.395	76.083	136.822	18.0074	144.736	296.105	317.092	130.094	69.0101	175.315	67.2011	149.069	243.535	9.536	68.2069	109.23	76.8179	90.5587	108.271	148.393	540.969	486.247	139.879	119.84	309.757	213.712	532.942	100.552	50.1078	317.29	76.6662	4.973	67.5377	248.132	91.8763	15.1491	61.5592	43.9875	204.053	2.3164	112.106	95.5033
Curvibacter_putative_symbiont_of_Hydra_magnipapillata	15.3534	21.2933	78.5694	153.451	116.399	27.2934	146.033	184.29	162.275	141.601	36.0253	191.006	127.05	236.565	12.5077	74.9799	129.329	94.4963	41.3225	45.3177	17.8683	180.425	104.316	20.518	213.675	88.4738	195.814	265.141	820.643	95.5672	29.7622	545.385	124.633	227.468	24.7436	323.469	561.932	41.3614	20.2515	95.2862	163.369	60.4486	242.661	50.4319	122.34	24.4239	17.8929	27.394	65.3899
Clostridiales_bacterium_VE202-03	63.95	98.3446	42.0604	40.3517	49.865	24.7646	107.995	100.254	63.5148	77.4689	50.0253	6.6391	4.5628	0.8412	301.727	28.1508	9.3235	59.4481	35.8995	104.267	16.3072	18.9093	33.6739	202.409	16.8325	30.6763	10.8546	10.6313	14.7007	17.8691	57.0676	22.3167	2.8104	3.2482	236.644	23.7713	5.4429	77.3233	60.093	40.9265	9.9308	43.625	46.6079	16.4376	152.469	62.2949	15.4308	67.7578	149.45
Firmicutes_bacterium_AF19-2LB	19.3808	7.8169	67.5593	6.7112	37.787	41.0179	114.421	131.644	57.5297	107.458	50.2387	19.3139	6.7699	12.5133	29.6873	39.0845	17.2904	76.271	29.0755	35.53	43.3022	13.3422	66.4297	25.7373	45.7324	69.1732	19.2552	26.3704	23.6175	10.147	48.1953	97.725	12.1519	6.6608	54.9743	24.3426	3.8163	69.5865	40.695	113.072	16.5874	16.262	82.0169	28.5506	60.808	22.8255	5.6081	73.0258	40.8202
Streptococcus_sp._ACS2	18.1472	5.6999	9.2694	14.5296	8.8974	10.8629	4.4366	2.1427	9.1521	3.1778	38.9321	99.5566	0.8111	0.6416	5.3671	7.7321	50.3876	47.3711	2.6167	172.446	1.4759	10.9617	50.3016	144.187	27.8614	4.9488	20.2101	8.8477	14.2391	0.2207	131.415	186.579	1.0316	0.306	0.3383	57.7721	2.5857	3.6853	26.4016	94.994	6.1616	15.1085	422.051	19.6505	21.1755	15.4623	163.418	40.4787	38.7282
Parabacteroides_sp._D26	25.969	0.1142	34.3973	83.0518	45.4499	92.5578	14.7373	2.0801	33.2823	87.3173	12.3412	3.6588	9.9649	0.0201	26.0555	9.2557	2.1482	0.0658	10.1161	63.8375	0.0618	0.1455	0.4001	38.682	0	10.4736	4.7871	134.678	0	0.7656	25.9874	0.7362	0	0.5099	66.8417	13.5906	0	204.899	1.0661	0.5247	1.0614	31.4399	11.948	1.768	2.8907	119.67	1.375	45.1031	10.7911
Ruminococcus_sp._OM07-7	3.7914	21.407	11.1172	4.2503	68.9248	23.8937	18.0911	19.7591	10.4672	31.3784	22.766	5.9941	1.2055	20.8125	14.6121	28.4877	1.9004	39.1742	25.9964	4.0681	13.0417	75.5454	20.6925	12.1161	13.6692	42.7204	57.6109	5.6251	113.19	19.3882	7.6694	46.7805	56.1655	63.1276	41.5575	46.3313	15.4902	23.3706	20.3832	149.5	42.5272	8.1232	23.4866	8.6505	82.0581	112.035	21.6959	8.3908	20.7121
Clostridium_sp._CAG:433	12.058	10.677	16.0781	10.3098	3.1489	5.3092	18.0705	13.0195	4.3373	13.3011	19.3803	25.815	37.847	42.5403	6.8185	6.2018	31.6462	25.8186	10.6647	18.7883	4.7517	23.7941	14.034	6.4107	17.79	12.5331	23.7014	9.8809	12.8328	19.7259	170.358	8.5152	37.4111	23.3097	8.8343	42.1704	18.2619	125.7	20.7908	10.7731	37.7755	4.4956	23.4975	12.8996	6.7457	19.5682	2.0728	5.8628	21.082
Streptococcus_sp._HMSC074B11	1.1135	0.229	0	0.2725	0.7999	1.7451	0.164	0.0776	0	0.25	3.8024	24.8759	0.0154	0.5104	1.9615	0.355	85.4974	0.5912	0.1012	4.4936	1.6688	0.28	7.8889	7.9192	1.598	0.1095	4.3038	1.162	0.5109	0.0378	2.3888	13.8425	0.2777	0.038	0.4181	6.2195	1.7101	0.3854	1.5705	10.3082	0.6162	0.1756	7.8316	2.9614	4.5668	2.0849	3.7765	0.9118	5.5462
Eubacterium_sp._68-3-10	14.1856	0	0	0	0	0.4899	0	0	1.1533	0.12	1.1249	2.1828	0.0459	0.1038	0.0825	0.2831	0.5722	0.1941	0.2668	0	2.4924	0.905	0.0738	0.4821	0.2341	0	5.7083	0	1.5391	0	0.4266	0.2429	0.4243	0.0961	0.26	0.1803	2.9441	0	0.1011	1.6033	0.1921	0	0.1847	0.2934	0.4201	0	1.3835	0.1328	1.2975
Lachnoanaerobaculum_sp._MSX33	0.766	0	0	0	0.4167	0	0	0	0	0	0	2.3039	0	0	0	0	0	0	0	0	0.8122	0	22.1719	0	0	0.5664	7.5397	0.3151	0	0	0	0	0	0	0	0.2136	0	0.0808	0.3994	0	0	0	0	0	0.6635	0	0	0	0
Litorilinea_aerophila	0.1252	0	0	0	0	0	0	0	0	0	1.0986	0	0	0	0	0	0	0	0	0	0	0	0	0	0	0.3194	0	0	0	0	0.1873	0	0	0.3003	0	0	0	0	0	0	0	0	0	0	0	0	0	0	0
[truncated: 2,862 more rows]
[truncated: 56 more columns]
